# Supplementary material for: Se-methylselenocysteine inhibits inflammatory response in an LPS-stimulated chicken HD11 macrophage-like cell model through the NFKB2 pathway
Source: Front Vet Sci. 2025 Jan 8;11:1503436. doi: 10.3389/fvets.2024.1503436 (PMC11751066; doi:10.3389/fvets.2024.1503436)
Supplement: Supplementary file 3 [file Data_Sheet_3.XLSX]

## Sheet: SeMC+LPS LPS
Limma resutls for SeMC+LPS/LPS
Transcript	logFC	AveExpr	t	P.Value	adj.P.Val	B	Diff
C1QB	3.28321	8.55181	69.1918	1.10522e-08	0.000178615	8.11977	T
LOC121109581	-1.20884	1.38692	-33.256	4.35774e-07	0.0029855	6.76936	T
BTN3A3L2	-0.97675	1.96168	-29.879	7.44663e-07	0.0029855	6.4504	T
NFKB2	1.66778	11.7829	29.0741	8.53635e-07	0.0029855	6.36364	T
PMEPA1	1.39951	8.66538	27.1111	1.21064e-06	0.0029855	6.13169	T
LOC121111987	-1.05285	3.68172	-27.0358	1.22758e-06	0.0029855	6.12217	T
C1QC	2.83236	8.38324	25.4799	1.65048e-06	0.0029855	5.91406	T
C1QTNF9B	-0.798747	0.399373	-24.4339	2.03459e-06	0.0029855	5.76094	T
LOC121107608	-0.798747	0.399373	-24.4339	2.03459e-06	0.0029855	5.76094	T
SCX	-0.798747	0.399373	-24.4339	2.03459e-06	0.0029855	5.76094	T
IRF8	0.829542	12.2641	23.9694	2.23902e-06	0.0029855	5.68923	T
TMPRSS6	3.32247	2.45998	23.7734	2.3326e-06	0.0029855	5.65825	T
DNASE2B	1.57144	7.66087	23.635	2.40155e-06	0.0029855	5.6361	T
BTBD18	1.57845	4.82571	22.548	3.03689e-06	0.003276	5.45426	T
TULP1	2.05698	4.73955	22.5424	3.04065e-06	0.003276	5.45328	T
LOC112531786	0.782498	0.391249	21.8818	3.52632e-06	0.0035618	5.33543	T
LOC121110003	-0.689915	4.9245	-20.5713	4.79558e-06	0.00390655	5.08363	T
C1QA	2.72501	8.96794	20.4937	4.88658e-06	0.00390655	5.06793	T
UMOD	3.65481	1.82741	20.2028	5.24673e-06	0.00390655	5.00819	T
CDH23	1.85514	6.99157	20.075	5.41491e-06	0.00390655	4.98153	T
CSMD1	-0.698917	10.3689	-19.8937	5.66473e-06	0.00390655	4.94325	T
NRK	0.801588	11.6563	19.7016	5.94464e-06	0.00390655	4.90209	T
LOC107055195	-0.904787	7.90824	-19.4047	6.41066e-06	0.00390655	4.83724	T
HIST1H2A4L2	4.35075	2.97412	19.3195	6.55235e-06	0.00390655	4.81836	T
IL13RA2	-0.841186	10.6165	-19.1945	6.76708e-06	0.00390655	4.79042	T
VSIR	1.66957	9.50485	19.1244	6.89118e-06	0.00390655	4.77463	T
LOC124417891	-0.955207	6.64328	-19.0705	6.9884e-06	0.00390655	4.76243	T
LOC107052519	1.48228	7.96183	18.9754	7.16419e-06	0.00390655	4.74077	T
PTGS2	-0.823041	8.47264	-18.7715	7.55894e-06	0.00390655	4.69379	T
NOS2	-0.733151	11.0072	-18.3973	8.35351e-06	0.00390655	4.60555	T
LOC107053051	-0.771568	4.38195	-18.3186	8.53321e-06	0.00390655	4.58664	T
MMR1L4	1.12957	10.6069	18.2905	8.59831e-06	0.00390655	4.57988	T
ENKUR	-0.828675	7.55432	-18.073	9.12405e-06	0.00390655	4.52691	T
CD83	-0.668949	8.83252	-18.0656	9.14278e-06	0.00390655	4.52507	T
LOC101751026	-0.753425	6.41706	-18.0253	9.24449e-06	0.00390655	4.51516	T
IL1R2	-0.643509	9.20275	-17.9713	9.38314e-06	0.00390655	4.5018	T
MRGPRH	-0.712722	12.8182	-17.9706	9.38482e-06	0.00390655	4.50164	T
LOC121108265	4.84279	2.95389	17.9539	9.42827e-06	0.00390655	4.49749	T
GPRC5A	-0.736926	1.15096	-17.8628	9.66908e-06	0.00390655	4.47481	T
LOC417067	-0.736926	1.15096	-17.8628	9.66908e-06	0.00390655	4.47481	T
MEF2D	0.726757	10.7851	17.6281	1.03245e-05	0.00394137	4.41557	T
NFKBIZ	-0.607976	10.4541	-17.568	1.05006e-05	0.00394137	4.40024	T
LOC107053298	1.11453	9.28113	17.4313	1.09153e-05	0.00394137	4.36502	T
LOC429518	0.689533	10.3666	17.3839	1.10635e-05	0.00394137	4.35273	T
LOC107054727	1.69136	4.60815	17.3564	1.11505e-05	0.00394137	4.34558	T
CD1C	1.07336	8.28143	17.3351	1.12185e-05	0.00394137	4.34002	T
FAM65B	1.16279	7.51143	17.1352	1.1882e-05	0.00395154	4.28741	T
LOC121107106	1.54508	3.30998	17.0985	1.2009e-05	0.00395154	4.27765	T
LOC121113303	3.75164	3.7151	17.0317	1.22439e-05	0.00395154	4.25983	T
LOC124417679	-0.710722	5.05727	-17.001	1.2354e-05	0.00395154	4.25159	T
PDCD4	0.737263	12.9202	16.9611	1.24984e-05	0.00395154	4.24087	T
HOXD9	-0.638842	9.49257	-16.8216	1.30202e-05	0.00395154	4.20308	T
LOC121110552	-0.936118	5.90707	-16.7903	1.31409e-05	0.00395154	4.19454	T
OASL	0.892926	8.01854	16.7741	1.32036e-05	0.00395154	4.19013	T
HMGB1	0.573546	13.0978	16.5939	1.39288e-05	0.00409278	4.14046	T
PADI2	2.47277	1.23638	16.1567	1.5895e-05	0.00458713	4.0168	T
GLUD2	0.728765	12.1897	16.0708	1.63195e-05	0.00461708	3.99195	T
CAPN14	-0.668997	10.2644	-16.0214	1.65702e-05	0.00461708	3.97756	T
LOC101751866	-0.585361	7.93828	-15.8418	1.75192e-05	0.00479473	3.92482	T
DPEP2	1.77165	8.87033	15.7907	1.78011e-05	0.00479473	3.90966	T
LOC121109193	4.65693	4.17347	15.7295	1.81462e-05	0.00480755	3.89139	T
CPEB2	1.06185	8.02274	15.6456	1.86316e-05	0.00485653	3.86624	T
SNX10	-0.695292	11.5685	-15.5826	1.90066e-05	0.00487564	3.84722	T
K123	-0.83506	9.75357	-15.3265	2.06269e-05	0.00513305	3.76881	T
LFNG	0.622517	10.5082	15.3237	2.06453e-05	0.00513305	3.76795	T
CHKA	-0.532388	11.7818	-15.2082	2.14309e-05	0.00518031	3.73199	T
LOC417973	-0.76398	9.02955	-15.0135	2.28372e-05	0.00518031	3.67056	T
NFKBIE	-0.516747	11.6136	-14.9954	2.29735e-05	0.00518031	3.66479	T
AvBD3	-0.678249	8.10387	-14.9872	2.30352e-05	0.00518031	3.66219	T
MEF2C	1.36411	7.81366	14.969	2.31738e-05	0.00518031	3.65638	T
LOC107049468	-0.800335	7.34707	-14.9674	2.31858e-05	0.00518031	3.65587	T
BCO1	0.891729	6.20284	14.9603	2.32407e-05	0.00518031	3.65358	T
DTX2	-0.584702	10.6159	-14.9396	2.33997e-05	0.00518031	3.64696	T
LOC107054619	-0.655342	5.28801	-14.7268	2.51148e-05	0.00526405	3.57813	T
NGEF	-0.632123	7.36834	-14.7252	2.51278e-05	0.00526405	3.57763	T
NREP	1.07301	7.09593	14.7215	2.51586e-05	0.00526405	3.57644	T
LOC121110557	-1.09183	2.46898	-14.6994	2.53462e-05	0.00526405	3.56919	T
SLC11A1	0.504115	12.305	14.6923	2.54066e-05	0.00526405	3.56686	T
FBXL21	-0.602677	11.5396	-14.632	2.5926e-05	0.00528145	3.54709	T
ACTA2	-0.608159	13.8083	-14.6003	2.62049e-05	0.00528145	3.53662	T
MN1	0.584765	9.62568	14.4963	2.7144e-05	0.00528145	3.50213	T
ADGRG6	2.56854	2.08302	14.4519	2.75577e-05	0.00528145	3.48728	T
NINJ1	-0.672328	10.8014	-14.3891	2.81544e-05	0.00528145	3.46623	T
TUBD1	-0.527967	11.3385	-14.3133	2.8896e-05	0.00528145	3.44064	T
UGT8L	-0.579886	7.24302	-14.2509	2.95241e-05	0.00528145	3.41944	T
PATL2	0.4805	8.98952	14.2017	3.00312e-05	0.00528145	3.40263	T
CSF1R	1.69897	10.311	14.1572	3.0498e-05	0.00528145	3.38739	T
FKBP5	1.30103	11.3076	14.1483	3.0593e-05	0.00528145	3.38431	T
NTN4L	-0.649969	9.08056	-14.1281	3.08086e-05	0.00528145	3.37736	T
MGAT5B	0.871418	8.55778	14.1143	3.09577e-05	0.00528145	3.37259	T
UNC13D	-0.63052	9.66843	-14.1117	3.09849e-05	0.00528145	3.37172	T
KCNK13	0.749641	6.12271	14.0889	3.12323e-05	0.00528145	3.36384	T
FRMD4A	-0.792521	7.556	-14.0782	3.13493e-05	0.00528145	3.36014	T
ABCA1	0.982197	10.1032	14.063	3.15167e-05	0.00528145	3.35487	T
LOC428421	0.710409	9.92168	14.0585	3.15663e-05	0.00528145	3.35331	T
SLC7A1	-0.997552	5.22971	-14.0527	3.163e-05	0.00528145	3.35131	T
MXRA8	0.751356	7.15184	14.0221	3.19716e-05	0.00528145	3.34066	T
CMBL	-0.886078	9.41861	-13.9938	3.22908e-05	0.00528145	3.3308	T
PLACL2	0.979977	8.97322	13.9617	3.26574e-05	0.00528145	3.31959	T
LOC124416954	-0.585543	10.7181	-13.9504	3.27879e-05	0.00528145	3.31563	T
LOC121113402	-0.810227	7.67479	-13.9315	3.3007e-05	0.00528145	3.30901	T
FCMAR	-0.949349	7.26686	-13.8863	3.35386e-05	0.0053139	3.29312	T
KCTD12B	1.51272	4.38411	13.7439	3.52809e-05	0.00545363	3.24265	T
KDELC2	0.701315	9.48264	13.7373	3.5365e-05	0.00545363	3.24027	T
RUFY4	0.537246	9.03857	13.7136	3.56656e-05	0.00545363	3.23182	T
FLRT2	-0.764868	8.67352	-13.7055	3.57703e-05	0.00545363	3.22889	T
INPP5D	0.558853	11.0916	13.6594	3.63668e-05	0.00549275	3.21236	T
PRODH2	2.98005	1.49003	13.6101	3.70187e-05	0.00553169	3.19458	T
PI3	-0.891153	9.18937	-13.5784	3.74453e-05	0.00553169	3.18311	T
RSFR	0.836057	12.6315	13.5629	3.76549e-05	0.00553169	3.17751	T
COCH	0.700763	13.7511	13.5382	3.79938e-05	0.00553169	3.16853	T
PDE1B	0.527958	7.83944	13.4843	3.87462e-05	0.00557812	3.14885	T
LOC101750112	-0.794919	9.73472	-13.4373	3.94154e-05	0.00557812	3.13165	T
WBSCR17	-0.784692	8.35231	-13.4334	3.94714e-05	0.00557812	3.13022	T
SEMA6C	-0.582505	8.56876	-13.4134	3.97612e-05	0.00557812	3.12287	T
SH2B1	0.754323	7.81713	13.3876	4.01391e-05	0.00557812	3.11335	T
BTG2	-0.62904	9.92914	-13.371	4.03837e-05	0.00557812	3.10724	T
EHD3	-0.447766	12.965	-13.3305	4.09905e-05	0.00559603	3.09222	T
LOC121107846	-0.548322	5.37324	-13.3162	4.12058e-05	0.00559603	3.08694	T
XDH	2.09135	6.32521	13.2545	4.2156e-05	0.00567737	3.06395	T
C26H6ORF222	0.912691	4.89059	13.063	4.52751e-05	0.00600203	2.99176	T
PRPSAP2	0.563248	9.2784	13.0609	4.53095e-05	0.00600203	2.99099	T
PHEX	0.698347	7.12877	13.0157	4.60869e-05	0.00601837	2.97374	T
SLC6A4	0.60516	10.0343	12.9993	4.63731e-05	0.00601837	2.96745	T
C9ORF58	0.906879	9.81719	12.9892	4.65501e-05	0.00601837	2.96359	T
LOC100858919	-0.462585	10.8028	-12.962	4.70307e-05	0.00603225	2.95316	T
WDR88	1.77315	0.886574	12.8781	4.85508e-05	0.00617358	2.92082	T
SH2D4A	-0.551695	7.20598	-12.8342	4.93692e-05	0.00617358	2.9038	T
BIRC2	-0.637912	11.2065	-12.8033	4.99549e-05	0.00617358	2.89178	T
PRKAR2B	-0.428717	11.2281	-12.7735	5.05294e-05	0.00617358	2.88013	T
VAV2	-0.488329	8.78915	-12.7458	5.10698e-05	0.00617358	2.86928	T
HEPHL1	-0.79714	9.53035	-12.7297	5.13859e-05	0.00617358	2.86298	T
TRPC4	0.985368	8.07283	12.66	5.27856e-05	0.00617358	2.83552	T
LOC107052490	0.485522	8.22211	12.6434	5.31247e-05	0.00617358	2.82897	T
EMB	0.540556	11.9622	12.6285	5.34341e-05	0.00617358	2.82304	T
LOC112530003	-1.06413	2.00538	-12.5879	5.42817e-05	0.00617358	2.80693	T
LOC121109911	-1.06413	2.00538	-12.5879	5.42817e-05	0.00617358	2.80693	T
A4GALT	-0.830554	9.12229	-12.5715	5.46298e-05	0.00617358	2.80038	T
TACC1	0.445744	13.7849	12.5691	5.46807e-05	0.00617358	2.79943	T
LOC395551	-0.769303	10.8778	-12.566	5.47456e-05	0.00617358	2.79821	T
DSE	3.62552	2.07901	12.5643	5.4782e-05	0.00617358	2.79753	T
ZC3H7B	0.474077	11.4201	12.5607	5.48586e-05	0.00617358	2.7961	T
GBP	0.680768	7.37066	12.5538	5.50066e-05	0.00617358	2.79334	T
SH3RF3	-0.725582	9.1312	-12.5471	5.51517e-05	0.00617358	2.79064	T
SLC7A3	-0.625407	12.6021	-12.536	5.53907e-05	0.00617358	2.78621	T
CD274	-0.770927	10.7339	-12.5036	5.60962e-05	0.00620939	2.77323	T
TF	0.476391	11.7007	12.4205	5.79552e-05	0.00634098	2.73976	T
CD72L1	-0.588178	10.661	-12.4155	5.80698e-05	0.00634098	2.73773	T
HIP1	0.534103	9.22472	12.3708	5.91029e-05	0.00641048	2.7196	T
ETS2	-0.44207	10.553	-12.3316	6.00256e-05	0.00646716	2.70366	T
KLF5	-0.43737	10.8155	-12.2894	6.10413e-05	0.00650071	2.68638	T
RGS22	3.45656	1.99453	12.2852	6.11415e-05	0.00650071	2.68469	T
CCL4	-0.750655	9.50439	-12.2533	6.1925e-05	0.00654098	2.67157	T
MAP2K6	1.14509	7.96307	12.2043	6.31487e-05	0.00662692	2.65138	T
LOC121107292	1.20157	5.71149	12.1746	6.39051e-05	0.00666303	2.63908	T
KLHL14	-0.588171	8.71573	-12.0127	6.82198e-05	0.00703977	2.57149	T
IL8L1	-0.774686	10.9376	-11.9997	6.85831e-05	0.00703977	2.56599	T
CSF3	-0.920915	6.9084	-11.991	6.88252e-05	0.00703977	2.56234	T
LAMB2	0.569963	12.1491	11.936	7.03864e-05	0.00715418	2.53907	T
GSTT1	0.70206	6.48337	11.908	7.11976e-05	0.0071914	2.52718	T
LOC107054090	-0.516261	7.80141	-11.7678	7.5432e-05	0.00756553	2.4671	T
TSPAN18	-0.509652	8.60124	-11.7304	7.66112e-05	0.00756553	2.45094	T
GALNT6	-0.469297	11.7466	-11.7039	7.74579e-05	0.00756553	2.43948	T
MDFIC	0.510356	11.5534	11.7014	7.75411e-05	0.00756553	2.43837	T
PCSK5	0.659756	8.45258	11.6876	7.79857e-05	0.00756553	2.4324	T
PDE4B	-0.465538	10.3958	-11.676	7.83643e-05	0.00756553	2.42735	T
DOK2	0.736129	8.53578	11.6708	7.8536e-05	0.00756553	2.42507	T
LOC107053702	-1.08857	3.55383	-11.6674	7.86467e-05	0.00756553	2.4236	T
PTPN2	-0.522061	11.5112	-11.6403	7.95422e-05	0.0076064	2.41178	T
WDFY4	-0.643088	10.4411	-11.5887	8.12814e-05	0.00772699	2.38919	T
LOC121107882	-0.417546	7.81807	-11.57	8.19241e-05	0.00774255	2.38096	T
LOC121111272	-0.593904	4.09186	-11.5485	8.26689e-05	0.00776751	2.37149	T
EAF2	-0.528703	7.33854	-11.5241	8.35275e-05	0.00778376	2.36068	T
ACBD4	0.580705	9.07576	11.5162	8.38051e-05	0.00778376	2.35721	T
LIPG	-0.850526	9.26001	-11.4894	8.47624e-05	0.00780812	2.34532	T
DUSP16	-0.483779	9.18402	-11.4818	8.50337e-05	0.00780812	2.34198	T
LOC121107122	2.21684	3.88392	11.4604	8.58084e-05	0.00781073	2.33248	T
LOC121109965	1.7269	5.67925	11.4544	8.60287e-05	0.00781073	2.32979	T
FAM221A	2.05958	5.08612	11.426	8.70729e-05	0.00782199	2.31715	T
TSKU	-0.465445	9.19513	-11.4248	8.71207e-05	0.00782199	2.31657	T
LOC107054876	-1.05007	2.6392	-11.3724	8.9091e-05	0.00795469	2.29311	T
TLR2A	0.909467	8.64473	11.341	9.02936e-05	0.00801777	2.27904	T
ABCC4	-0.414261	11.648	-11.2928	9.21844e-05	0.00810824	2.25726	T
SLC23A2	-0.537246	10.7966	-11.2774	9.28e-05	0.00810824	2.25027	T
BEST4	-1.03947	3.96117	-11.2605	9.3476e-05	0.00810824	2.24264	T
STAB1	0.481736	10.111	11.2452	9.40978e-05	0.00810824	2.23566	T
LOC121113288	-0.929049	4.6319	-11.2354	9.44981e-05	0.00810824	2.2312	T
LOC121107141	-0.586487	11.3836	-11.23	9.47166e-05	0.00810824	2.22876	T
TMEM119	0.75626	8.21425	11.2274	9.48244e-05	0.00810824	2.22757	T
NRCAM	0.586597	6.78468	11.2004	9.59416e-05	0.00812529	2.21524	T
VSTM5	-1.22115	3.02291	-11.1983	9.60293e-05	0.00812529	2.21428	T
SLC13A3	2.17695	3.23028	11.1614	9.75804e-05	0.00817091	2.1974	T
IER5L	0.612032	10.0634	11.1541	9.78926e-05	0.00817091	2.19403	T
EPB41	0.513253	9.09764	11.1375	9.86006e-05	0.00817091	2.18644	T
P2RY6	1.41741	8.08548	11.1159	9.95348e-05	0.00817091	2.17649	T
FGFR3	0.740267	9.27796	11.1121	9.97036e-05	0.00817091	2.17471	T
J6367_mgt11	1.02912	4.01329	11.1067	9.99365e-05	0.00817091	2.17224	T
ORAI3	-0.457877	9.62162	-11.0741	0.000101376	0.00817091	2.15715	T
LOC121107946	-0.449745	9.54976	-11.0725	0.000101444	0.00817091	2.15645	T
LOC121109966	0.518879	6.99803	11.0695	0.000101579	0.00817091	2.15504	T
DNASE1L3	1.7549	5.6231	11.0636	0.000101842	0.00817091	2.15231	T
LOC107050103	-0.411119	12.0901	-11.0572	0.00010213	0.00817091	2.14933	T
LOC426820	0.475068	12.9782	11.0014	0.000104668	0.00829263	2.1234	T
LOC107049469	-0.68821	5.21376	-11.0012	0.000104678	0.00829263	2.12331	T
VWA5B1	0.961069	5.99366	10.9458	0.000107273	0.00845677	2.09741	T
KCNQ5	-0.636982	6.01297	-10.9246	0.000108286	0.00848569	2.08746	T
SYCE2	1.35302	4.32214	10.9077	0.000109102	0.00848569	2.07951	T
PELI2	-0.407134	8.78523	-10.9022	0.000109373	0.00848569	2.07689	T
TPM1	-0.461849	11.6227	-10.8946	0.00010974	0.00848569	2.07334	T
KDR	-0.630622	4.61518	-10.8385	0.000112523	0.00865948	2.0468	T
LOC121106732	-0.738114	6.06135	-10.8262	0.000113147	0.00866618	2.04094	T
SEC61A2	-0.375487	11.0915	-10.783	0.00011536	0.00879403	2.02039	T
S100A12	-0.840524	6.65469	-10.722	0.000118576	0.00891927	1.9912	T
PPP2CA	0.537336	7.32678	10.7191	0.000118731	0.00891927	1.98982	T
IRAK2	-0.461492	12.5315	-10.7107	0.000119184	0.00891927	1.98577	T
SDC2	-0.67304	7.81648	-10.7077	0.000119344	0.00891927	1.98434	T
LOC416169	-0.606912	10.6711	-10.7	0.000119762	0.00891927	1.98062	T
LSP1P1	0.481987	10.0211	10.6833	0.000120669	0.00893835	1.9726	T
MMP27	-0.884143	8.36392	-10.6691	0.000121448	0.00893835	1.96576	T
RNASE6	1.00926	8.94381	10.665	0.000121678	0.00893835	1.96375	T
GADD45G	0.754249	8.95149	10.6355	0.000123318	0.00899257	1.94951	T
LOC776507	-0.732046	10.371	-10.6318	0.000123529	0.00899257	1.94769	T
SESN3	-0.410217	9.9597	-10.5965	0.000125534	0.00909756	1.93055	T
UGT2A1	-0.593175	11.7241	-10.555	0.000127936	0.00913115	1.91036	T
MGAT3	0.774444	10.2354	10.5505	0.000128202	0.00913115	1.90815	T
LOC101749531	0.488213	10.697	10.5329	0.000129246	0.00913115	1.89951	T
PIK3R5	-0.415234	12.1431	-10.5292	0.000129465	0.00913115	1.8977	T
HIVEP3	0.560286	9.86783	10.5203	0.000129991	0.00913115	1.89338	T
LOC124417970	-0.90526	4.17971	-10.5173	0.000130174	0.00913115	1.89187	T
EPB41L3	0.64249	8.13119	10.5059	0.000130855	0.00913115	1.88631	T
IL8L2	-0.768692	11.949	-10.5051	0.000130909	0.00913115	1.88587	T
MMP1	-0.879727	7.08985	-10.5022	0.000131083	0.00913115	1.88446	T
NDRG1	1.06625	6.35614	10.4526	0.000134119	0.00926554	1.86002	T
LOC100858505	0.526608	8.00108	10.4519	0.000134158	0.00926554	1.85971	T
CNOT6	0.402355	9.93958	10.4235	0.000135934	0.00932417	1.84567	T
C9orf72	0.608119	7.65602	10.4199	0.000136161	0.00932417	1.84388	T
TNFAIP3	-0.375706	11.1954	-10.3911	0.000137997	0.00941	1.82958	T
AKR1B10	0.571844	9.52626	10.3783	0.000138825	0.00942665	1.82319	T
NT5E	-0.432757	11.1393	-10.3415	0.000141229	0.00954978	1.80483	T
CMPK2	0.845709	7.31518	10.3264	0.000142228	0.00957727	1.79729	T
CTSH	0.479598	12.0317	10.2512	0.000147337	0.0098492	1.7595	T
LOC112531816	1.21207	4.29094	10.2491	0.000147485	0.0098492	1.75842	T
MECR	0.591137	9.29015	10.233	0.000148609	0.0098834	1.75029	T
PKD1L2	4.14801	2.074	10.1951	0.000151293	0.0100156	1.7311	T
LOC121106534	-0.742006	6.46886	-10.1875	0.000151836	0.0100156	1.72726	T
TMEM123	-0.504621	12.8178	-10.1717	0.000152981	0.0100454	1.7192	T
ZNF326	0.346657	10.0265	10.1641	0.000153531	0.0100454	1.71535	T
CLIP2	0.457434	9.31139	10.1316	0.000155927	0.010109	1.69873	T
TBC1D7	-0.450428	8.78693	-10.1288	0.00015613	0.010109	1.69733	T
HMGN2P46	0.416017	8.36005	10.1192	0.000156847	0.010109	1.69241	T
FAM169B	-0.48785	9.68111	-10.1171	0.000157005	0.010109	1.69133	T
RAD51B	-0.374256	8.71065	-10.0891	0.000159114	0.010112	1.677	T
LOC124417141	1.09117	5.34559	10.0873	0.000159253	0.010112	1.67606	T
LOC121113291	-1.14672	2.70377	-10.0866	0.000159311	0.010112	1.67567	T
IL1B	-0.806825	13.1217	-10.0834	0.000159554	0.010112	1.67404	T
SOCS3	-0.397228	10.1322	-10.0652	0.000160944	0.0101419	1.66471	T
CA12	-0.52203	8.87683	-10.0609	0.000161282	0.0101419	1.66246	T
CRIP1	0.727974	11.6068	10.0506	0.000162081	0.0101527	1.65715	T
DAP	0.564311	11.1336	10.0413	0.000162804	0.0101586	1.65236	T
FAM20A	-1.031	2.92784	-10.0186	0.000164592	0.0101725	1.64061	T
ARHGAP45	0.373082	11.5996	10.0183	0.000164615	0.0101725	1.64046	T
LOC101748714	0.922216	3.94517	10.0145	0.000164915	0.0101725	1.63851	T
SNTA1	0.573418	10.065	10.003	0.000165827	0.0101828	1.63257	T
LITAF	-0.369495	9.0189	-9.99659	0.000166342	0.0101828	1.62923	T
WIPF3	-0.451383	5.13019	-9.97678	0.00016794	0.0102227	1.61895	T
TXNRD1	0.379692	10.1721	9.97285	0.000168259	0.0102227	1.61691	T
TNFRSF4	0.520137	7.03671	9.94883	0.000170226	0.0102987	1.60439	T
LOC121110618	3.09849	1.8155	9.9368	0.00017122	0.0102987	1.59812	T
KCNAB1	-0.742867	6.86882	-9.93437	0.000171422	0.0102987	1.59685	T
PIGL	-0.458982	6.41561	-9.91621	0.000172939	0.0103514	1.58736	T
CCL5	-0.926755	8.68549	-9.90603	0.000173797	0.0103643	1.58203	T
TBXAS1	0.836	8.96528	9.88426	0.000175647	0.0104362	1.57061	T
DYSF	0.340596	9.72425	9.85828	0.000177887	0.0105305	1.55695	T
GAB2	-0.503617	9.00897	-9.84424	0.000179112	0.0105643	1.54955	T
LOC124417160	1.28086	4.31077	9.81732	0.000181487	0.0106388	1.53533	T
LOC121110450	-0.832409	3.67395	-9.81504	0.00018169	0.0106388	1.53412	T
FYB1	0.423493	8.33159	9.75007	0.000187588	0.0109445	1.49962	T
SLC2A6	-0.43373	9.94052	-9.72915	0.000189536	0.010971	1.48846	T
LOC107054089	1.11314	4.75835	9.72872	0.000189576	0.010971	1.48824	T
AvBD6	-0.667427	7.51934	-9.71637	0.000190737	0.010971	1.48163	T
TRAF7	-0.385561	11.1303	-9.71615	0.000190758	0.010971	1.48152	T
LRRC71	1.02945	6.66609	9.70888	0.000191446	0.0109715	1.47763	T
IL2RA	-0.891374	7.43604	-9.68892	0.000193349	0.0110414	1.46693	T
SGPL1	-0.438226	9.48105	-9.6792	0.000194284	0.0110557	1.46171	T
PANX1	0.663769	7.1819	9.66886	0.000195284	0.0110708	1.45616	T
DUSP4	0.458885	12.1634	9.66233	0.00019592	0.0110708	1.45264	T
RIPK4	-0.393296	9.15018	-9.6392	0.000198189	0.01116	1.44018	T
MYO1F	0.547732	9.97823	9.62745	0.000199353	0.0111612	1.43384	T
NELFCD	0.400289	11.8475	9.62206	0.000199891	0.0111612	1.43092	T
TPST2	0.553434	8.79321	9.6178	0.000200315	0.0111612	1.42862	T
CD63	-0.392826	13.0693	-9.60999	0.000201099	0.0111612	1.4244	T
LOC100858973	-0.353034	11.4894	-9.60439	0.000201663	0.0111612	1.42136	T
LOC107049264	-0.414493	10.3958	-9.58183	0.000203953	0.0112494	1.40913	T
CACNG2	3.83506	3.51621	9.56309	0.000205879	0.011317	1.39895	T
FADS6	-0.685844	6.41104	-9.54941	0.000207299	0.0113564	1.3915	T
GTSE1	0.458436	9.82155	9.53726	0.000208569	0.0113875	1.38487	T
TIMELESS	0.527115	10.0942	9.5299	0.000209344	0.0113913	1.38086	T
SHTN1	1.88606	5.8428	9.51031	0.000211421	0.0114282	1.37015	T
TGM4	-0.906387	8.84205	-9.50775	0.000211694	0.0114282	1.36875	T
LOC112533186	-0.714946	8.12703	-9.4975	0.000212792	0.0114282	1.36314	T
PSD3	0.565261	12.7462	9.49695	0.000212852	0.0114282	1.36283	T
SAMD15	-0.779827	4.15207	-9.48444	0.000214202	0.0114493	1.35597	T
RAB7B	-0.425222	6.6357	-9.47001	0.000215772	0.0114493	1.34804	T
LOC107051636	-0.743372	3.9385	-9.46579	0.000216234	0.0114493	1.34573	T
HMGN4	0.358134	12.1183	9.46238	0.000216608	0.0114493	1.34384	T
ANKDD1B	-0.717082	6.50527	-9.46076	0.000216786	0.0114493	1.34296	T
SH3KBP1	0.326879	12.0632	9.45091	0.000217872	0.0114691	1.33753	T
CTSC	0.505044	10.95	9.42197	0.000221099	0.0115842	1.32156	T
LOC396098	2.83943	2.46638	9.4185	0.00022149	0.0115842	1.31964	T
LOC101751111	1.25983	2.31714	9.39672	0.000223962	0.0116756	1.30759	T
CIITA	-0.587066	8.54817	-9.3873	0.000225041	0.0116942	1.30236	T
ANXA2	-0.345233	13.1599	-9.37458	0.000226509	0.0117327	1.2953	T
SLC22A16	0.793959	1.9164	9.36196	0.000227974	0.0117335	1.28829	T
LOC121107144	-0.792898	7.36587	-9.36195	0.000227976	0.0117335	1.28828	T
EML5	1.45731	3.74222	9.35427	0.000228875	0.011742	1.284	T
C3AR1L	-0.452275	9.00831	-9.34572	0.000229879	0.011742	1.27924	T
FOXN3	0.470601	10.6157	9.34198	0.00023032	0.011742	1.27716	T
POLA1	0.485852	10.6194	9.33202	0.0002315	0.0117489	1.2716	T
LAMP1	0.377094	13.4385	9.32858	0.00023191	0.0117489	1.26967	T
IPCEF1	0.6883	7.43093	9.28653	0.000236982	0.0119683	1.24613	T
PTGES	-0.854057	3.44664	-9.26784	0.000239279	0.0120085	1.23563	T
CARHSP1	-0.501966	9.8507	-9.26479	0.000239656	0.0120085	1.23392	T
LOC100858226	-0.648702	5.35123	-9.26196	0.000240006	0.0120085	1.23233	T
ID2	0.592985	9.74344	9.24268	0.000242412	0.0120657	1.22146	T
LOC121109170	-0.565775	7.22581	-9.23023	0.000243981	0.0120657	1.21444	T
NLRP3	0.553265	7.5477	9.22972	0.000244045	0.0120657	1.21415	T
SUCNR1	0.547304	10.6444	9.22901	0.000244135	0.0120657	1.21375	T
SMAD3	0.694853	7.48116	9.21988	0.000245294	0.012086	1.20859	T
ECM1	-0.442841	11.8355	-9.19831	0.000248058	0.0121543	1.19638	T
NUFIP2	0.408977	10.8903	9.19355	0.000248673	0.0121543	1.19368	T
NPNT	-0.525662	6.11549	-9.18385	0.000249932	0.0121543	1.18817	T
BHLHE41	0.705186	5.68335	9.17244	0.000251421	0.0121543	1.18169	T
STT3B	0.368678	12.4246	9.16541	0.000252346	0.0121543	1.17769	T
LOC112531260	-0.39795	7.65994	-9.15651	0.00025352	0.0121543	1.17263	T
UAP1L1	0.308609	11.3773	9.15596	0.000253594	0.0121543	1.17231	T
NFKBIA	-0.599346	11.6126	-9.15553	0.00025365	0.0121543	1.17207	T
ACIN1	0.347517	11.2965	9.15319	0.00025396	0.0121543	1.17074	T
PANK3	-0.435985	13.7721	-9.15137	0.000254203	0.0121543	1.1697	T
TMPO	0.391988	12.0029	9.14267	0.00025536	0.0121737	1.16474	T
PIK3AP1	-0.324575	12.6703	-9.11793	0.000258689	0.0122961	1.15061	T
ACSL1	-0.636389	10.8638	-9.08213	0.000263599	0.0124445	1.13008	T
TTC19	-0.470464	10.2942	-9.07915	0.000264012	0.0124445	1.12837	T
RALGPS2	-0.34891	9.44214	-9.07565	0.000264499	0.0124445	1.12636	T
NFATC1	-0.410186	7.24285	-9.0689	0.00026544	0.0124445	1.12248	T
AQP11	1.22236	3.55218	9.06732	0.000265661	0.0124445	1.12157	T
LOC100859304	-0.664013	3.73172	-9.05796	0.000266975	0.0124699	1.11618	T
ADRA1B	-0.458878	8.17065	-9.04789	0.000268397	0.0124733	1.11038	T
UPP1	-0.531093	11.0156	-9.04652	0.000268593	0.0124733	1.10959	T
LOC427029	-0.713311	9.22455	-9.02017	0.000272359	0.012582	1.09437	T
DMBT1	0.467392	11.8244	9.01926	0.00027249	0.012582	1.09384	T
ARHGEF18	0.356978	10.0609	9.00651	0.000274338	0.0126313	1.08646	T
LOC121109031	-0.639732	8.76748	-8.99754	0.000275646	0.0126554	1.08126	T
DPYSL2	0.406436	9.47729	8.97167	0.000279459	0.0127942	1.06624	T
SLCO4C1	-0.567458	12.8981	-8.96355	0.000280669	0.0128132	1.06151	T
GPER1	0.679511	7.7495	8.95552	0.000281871	0.0128319	1.05683	T
EVA1A	-0.335605	7.19844	-8.92545	0.000286431	0.0130028	1.03927	T
FNDC5	-0.491313	6.56739	-8.91796	0.00028758	0.0130184	1.03489	T
OTUD7A	-0.354347	8.58993	-8.89023	0.000291883	0.0131158	1.01863	T
LOC101752332	0.583033	5.61823	8.88747	0.000292314	0.0131158	1.01702	T
COQ6	-0.34987	8.53333	-8.8845	0.000292781	0.0131158	1.01527	T
LOC112530844	-1.07828	3.9382	-8.88324	0.000292978	0.0131158	1.01453	T
LOC422929	1.49523	5.39243	8.86716	0.000295519	0.0131592	1.00507	T
DMTF1	0.502811	8.47225	8.86682	0.000295574	0.0131592	1.00487	T
KRT40	3.6672	3.67288	8.79705	0.00030691	0.0136263	0.963624	T
ZNF503	-0.591011	7.93441	-8.78804	0.000308412	0.0136316	0.958273	T
SLC39A13	-0.317793	9.91175	-8.78333	0.0003092	0.0136316	0.955472	T
ASS1	0.437128	11.6917	8.77919	0.000309895	0.0136316	0.95301	T
FMNL2	-0.29585	8.50029	-8.77569	0.000310483	0.0136316	0.950932	T
LOC107050229	0.559797	8.38894	8.76971	0.000311493	0.0136316	0.94737	T
MYORG	0.667806	6.40887	8.76617	0.000312091	0.0136316	0.945264	T
SMOC1	-0.369027	7.41162	-8.75787	0.000313502	0.0136409	0.940316	T
LOC101752086	-0.42754	4.72743	-8.755	0.000313992	0.0136409	0.938603	T
ITGB6	-0.569691	7.50201	-8.74057	0.000316466	0.0137116	0.92999	T
TRAF2	-0.563436	11.4983	-8.73202	0.000317943	0.0137387	0.924879	T
ZSWIM7	-0.491809	10.6581	-8.72646	0.000318909	0.0137435	0.921551	T
DNAJC5	-0.441697	9.94879	-8.71563	0.000320799	0.0137435	0.915064	T
HPD	-0.372761	7.7143	-8.71444	0.000321007	0.0137435	0.914352	T
PKN2	0.381	10.5109	8.70812	0.000322117	0.0137435	0.910563	T
DENND2C	0.545463	7.86254	8.70333	0.000322961	0.0137435	0.907692	T
NEURL1B	-0.354809	9.20099	-8.70222	0.000323157	0.0137435	0.907026	T
LOC418086	-0.752255	3.90786	-8.69475	0.000324479	0.0137635	0.90254	T
H1FX	0.399418	11.5379	8.67674	0.000327695	0.0138636	0.89171	T
HLX	0.405744	10.8662	8.66721	0.000329413	0.0138998	0.885966	T
NFKB1	-0.294186	11.1311	-8.65528	0.000331578	0.0139548	0.878771	T
LYZ	-0.669725	14.2791	-8.64481	0.00033349	0.0139935	0.872451	T
GPRIN3	0.486755	10.0615	8.64078	0.000334231	0.0139935	0.870014	T
LOC121110567	2.09889	3.19125	8.62944	0.000336323	0.0140199	0.863155	T
LOC101749404	1.58945	4.48724	8.62795	0.000336598	0.0140199	0.862255	T
SQSTM1	-0.293	9.72709	-8.6233	0.000337462	0.0140199	0.859439	T
NTNG2	-0.496831	9.66976	-8.60637	0.000340629	0.0141152	0.849169	T
GPR65	1.10179	4.97332	8.58837	0.000344033	0.0142197	0.838235	T
ZC2HC1C	-0.487403	5.60877	-8.5611	0.000349269	0.0143072	0.821621	T
CHST13	-0.41078	13.0012	-8.55998	0.000349485	0.0143072	0.820939	T
CISH	-0.738179	4.68448	-8.55998	0.000349486	0.0143072	0.820939	T
STAT1	0.424057	9.86109	8.55893	0.000349689	0.0143072	0.820298	T
GCNT4	-0.423414	12.0404	-8.55415	0.000350618	0.0143089	0.81738	T
SLC9A7	-0.36895	10.5252	-8.54395	0.000352611	0.014354	0.811142	T
TOM1L2	-0.300684	7.90083	-8.53093	0.000355172	0.0144219	0.803179	T
LOC107053706	1.55759	4.4821	8.52355	0.000356635	0.0144451	0.798654	T
B4GALNT3	4.08458	2.55645	8.50253	0.000360837	0.0145776	0.785759	T
ADA	0.59731	9.06777	8.49497	0.000362363	0.0145776	0.78111	T
TNC	1.28823	8.31319	8.48939	0.000363496	0.0145776	0.777674	T
C1HXORF59	-0.894527	2.93808	-8.48755	0.00036387	0.0145776	0.776542	T
TTYH3	0.49384	9.06726	8.48177	0.000365046	0.0145776	0.772988	T
NT5C3A	0.503351	8.54278	8.47236	0.000366974	0.0145776	0.767186	T
LOC101748339	-0.457283	9.83766	-8.4714	0.00036717	0.0145776	0.766596	T
SRC	0.332584	9.41083	8.46814	0.000367841	0.0145776	0.764585	T
PTAFR	-0.420335	9.0632	-8.46725	0.000368025	0.0145776	0.764034	T
LOC124417205	-0.809751	5.34678	-8.45831	0.000369874	0.014615	0.758514	T
DNAJC5B	-0.781771	5.84533	-8.45238	0.000371105	0.0146279	0.754853	T
KLF2	0.713209	8.89206	8.41895	0.000378143	0.0148022	0.734148	T
KCNQ2	1.30488	3.58922	8.41877	0.000378182	0.0148022	0.734035	T
LOC107049673	1.03816	4.60477	8.41366	0.000379272	0.0148022	0.730864	T
LOC107054808	-0.394644	8.448	-8.40602	0.00038091	0.0148022	0.726113	T
HIST1H101	-0.417355	7.86481	-8.39965	0.000382278	0.0148022	0.722158	T
PLCG1	0.524169	8.9298	8.39927	0.000382361	0.0148022	0.721919	T
OAT	-0.320605	11.3665	-8.39519	0.000383243	0.0148022	0.719379	T
NEK6	-0.283851	11.6608	-8.38527	0.000385394	0.0148022	0.713206	T
PPP1R7	-0.302198	11.0717	-8.38264	0.000385969	0.0148022	0.711562	T
INPP1	-0.640755	11.2439	-8.3811	0.000386304	0.0148022	0.710604	T
BCL2L11	-0.293836	8.56816	-8.37337	0.000387996	0.0148022	0.705785	T
LOC121107590	-1.19085	3.31318	-8.37196	0.000388306	0.0148022	0.704904	T
MIR1598	3.58396	3.2313	8.37133	0.000388445	0.0148022	0.704509	T
LYG2	-0.722104	8.32621	-8.37131	0.000388449	0.0148022	0.704499	T
LOC121110553	-0.924124	4.22026	-8.36759	0.000389268	0.0148022	0.702176	T
EPHA2	-0.432275	9.02988	-8.34988	0.000393194	0.0149165	0.691104	T
LOC107054225	-0.374025	7.91458	-8.32962	0.000397742	0.0150393	0.678414	T
LOC107053353	0.382779	10.3689	8.32527	0.000398726	0.0150393	0.675685	T
PAK3	-0.293261	11.5778	-8.32308	0.000399224	0.0150393	0.674309	T
ACVR2A	-0.34004	9.59176	-8.30883	0.000402474	0.0151265	0.66536	T
RNF223	-0.752244	6.08124	-8.3024	0.000403951	0.0151448	0.661316	T
LOC112532216	-0.480384	6.27547	-8.29497	0.000405666	0.0151448	0.656638	T
LOC107052855	-1.09603	2.94246	-8.28988	0.000406847	0.0151448	0.653427	T
LOC121107460	-0.896717	4.40922	-8.28563	0.000407835	0.0151448	0.650749	T
CYP1B1	3.01162	2.03831	8.28022	0.000409097	0.0151448	0.647339	T
CROCC	0.461683	12.4437	8.27918	0.000409341	0.0151448	0.64668	T
KCNH4	0.348281	7.46928	8.2784	0.000409521	0.0151448	0.646193	T
J6367_mgt10	0.516288	3.85236	8.24258	0.000418006	0.0154233	0.623539	T
UNC93B1	0.699483	9.02158	8.22173	0.000423042	0.0155697	0.610307	T
G0S2	-0.816493	10.2702	-8.21821	0.0004239	0.0155697	0.608066	T
CEBPB	-0.305217	14.0643	-8.21115	0.000425625	0.0155738	0.603577	T
ACSS3	0.882584	5.99828	8.20573	0.000426956	0.0155738	0.600126	T
CLYBL	-0.712123	3.23118	-8.20456	0.000427243	0.0155738	0.599383	T
LOC107053008	0.612634	6.0408	8.19874	0.000428679	0.0155738	0.595674	T
MLKL	-0.882098	8.04546	-8.19615	0.000429317	0.0155738	0.594029	T
TOMM7	-0.36797	9.45417	-8.19422	0.000429795	0.0155738	0.592799	T
LOC121111662	-1.05317	3.33059	-8.19024	0.000430785	0.0155747	0.590257	T
LOC121107627	-0.366272	10.8687	-8.16578	0.000436914	0.0157192	0.574633	T
SRGAP2	0.494489	11.2792	8.163	0.000437617	0.0157192	0.572856	T
PLEKHA2	0.331797	10.1743	8.15529	0.000439573	0.0157192	0.567922	T
LMNB1	0.319332	10.9044	8.155	0.000439648	0.0157192	0.567734	T
KIF5C	0.296574	9.52738	8.15291	0.00044018	0.0157192	0.566396	T
ZUFSP	0.370701	8.11189	8.1512	0.000440615	0.0157192	0.565303	T
LOC101751989	-1.13781	2.98124	-8.12854	0.000446444	0.0158198	0.550762	T
SELPLG	0.408806	9.75732	8.12311	0.000447855	0.0158198	0.547271	T
SEC23A	-0.327294	8.77228	-8.12243	0.000448033	0.0158198	0.546831	T
LOC121111169	-0.547559	3.87995	-8.12024	0.000448603	0.0158198	0.545425	T
ZBTB7B	-0.345672	9.25655	-8.11828	0.000449114	0.0158198	0.544164	T
POLE	0.370806	10.2608	8.1145	0.000450103	0.0158198	0.541729	T
GGNBP2	-0.267367	9.41279	-8.11379	0.000450289	0.0158198	0.541273	T
PPM1M	-0.377745	8.42993	-8.10701	0.000452068	0.0158479	0.536909	T
LOC124417186	-1.16761	3.16087	-8.09217	0.000455992	0.0159326	0.527341	T
PAF1	0.361391	9.86082	8.08981	0.00045662	0.0159326	0.525818	T
NOP56	0.363514	11.41	8.08673	0.000457442	0.0159326	0.523826	T
HPGDS	-0.364017	8.86033	-8.05135	0.000466999	0.016186	0.50093	T
KMT5B	-0.425138	9.7767	-8.04923	0.00046758	0.016186	0.499552	T
RAB3C	-0.682653	7.26513	-8.04871	0.000467723	0.016186	0.499213	T
LOC112530219	0.85503	3.29174	8.04042	0.000470001	0.0162106	0.49383	T
LACC1	-0.451871	9.77768	-8.03882	0.00047044	0.0162106	0.492797	T
LOC100859898	-0.904955	2.56664	-8.02503	0.000474262	0.0163076	0.483832	T
ELMO1	0.444346	10.9982	8.01707	0.000476486	0.0163111	0.478648	T
PDGFRB	1.25182	5.67761	8.01504	0.000477056	0.0163111	0.477324	T
GVINP1	1.38959	7.08896	8.01384	0.000477393	0.0163111	0.47654	T
ANXA1	0.696481	5.98441	8.00352	0.000480299	0.0163757	0.469817	T
EDNRB	0.573626	9.33692	7.99437	0.000482895	0.0164003	0.463841	T
GFRA1	-0.326567	9.90017	-7.9913	0.000483769	0.0164003	0.461837	T
RFX2	0.723192	7.28358	7.97856	0.000487419	0.0164003	0.453504	T
LIG4	0.429341	5.86871	7.97171	0.000489395	0.0164003	0.449019	T
COL27A1	0.967938	5.4355	7.96896	0.000490189	0.0164003	0.447222	T
PKIG	-0.415062	9.25313	-7.9669	0.000490787	0.0164003	0.445869	T
BHLHE40	-0.28402	11.8883	-7.96495	0.000491352	0.0164003	0.444594	T
SIRPA	0.515132	9.60866	7.96386	0.000491671	0.0164003	0.443874	T
MED30	-0.387204	7.73026	-7.96082	0.000492555	0.0164003	0.441881	T
LOC107049129	0.79712	8.76549	7.95734	0.00049357	0.0164003	0.439599	T
STEAP3	-0.430087	9.26629	-7.95684	0.000493714	0.0164003	0.439276	T
ARID5B	-0.306965	8.34251	-7.9561	0.000493932	0.0164003	0.438787	T
MAP3K14	-0.294733	12.0695	-7.95428	0.000494464	0.0164003	0.437592	T
LOC107053373	-0.827163	5.59456	-7.94859	0.000496132	0.0164003	0.433858	T
RCSD1	0.3375	9.91638	7.94683	0.000496651	0.0164003	0.432699	T
LOC107054664	2.33501	3.01251	7.94477	0.000497256	0.0164003	0.431348	T
LOC107055489	-0.932552	3.5994	-7.93938	0.000498848	0.0164193	0.427804	T
NHSL2	0.350327	10.7226	7.93097	0.000501341	0.0164632	0.422272	T
LZTS3	-0.470761	9.85514	-7.92436	0.000503314	0.0164632	0.417916	T
LRP1	0.585999	14.7104	7.91961	0.000504735	0.0164632	0.414788	T
GTF2I	0.286632	9.0671	7.91492	0.000506142	0.0164632	0.411699	T
CARD11	0.920385	7.0593	7.91275	0.000506798	0.0164632	0.410264	T
MMP23A	-0.738703	9.95572	-7.91133	0.000507223	0.0164632	0.409332	T
SLC6A9	1.98195	3.84037	7.91104	0.000507311	0.0164632	0.409139	T
KCNU1	0.30218	8.34938	7.88768	0.000514418	0.0166604	0.393701	T
LOC426526	-0.330797	8.048	-7.87842	0.000517267	0.0167191	0.387572	T
PRMT3	0.291801	9.00386	7.86677	0.000520877	0.0168022	0.379851	T
GPR27	-0.406787	10.2485	-7.8592	0.000523242	0.0168448	0.374823	T
SLC30A3	0.878479	6.68697	7.85397	0.000524881	0.016864	0.371349	T
ADAMDEC1	0.85811	6.66358	7.85039	0.000526008	0.0168667	0.368967	T
PCBD1	-0.266534	8.25502	-7.83009	0.000532445	0.0169834	0.355461	T
PSMG2	-0.520452	9.39037	-7.82889	0.000532828	0.0169834	0.354662	T
LOC121107290	0.363771	8.2948	7.82596	0.000533768	0.0169834	0.352703	T
DTNB	-0.382819	9.09503	-7.8257	0.000533852	0.0169834	0.35253	T
MPZL1	0.621205	8.93473	7.81842	0.00053619	0.0170243	0.347675	T
LOC121107763	3.46906	4.665	7.8078	0.000539624	0.0170997	0.340584	T
GLCCI1	0.385084	9.33157	7.78322	0.000547672	0.0173208	0.324135	T
SPAG5	0.382705	11.3563	7.77759	0.000549537	0.0173458	0.320356	T
TTF2	0.301025	9.473	7.75994	0.000555429	0.0174976	0.308504	T
P2RY10	-0.299781	9.01248	-7.74481	0.000560537	0.0176033	0.298326	T
CEP83	0.382175	8.05793	7.7413	0.000561729	0.0176033	0.295964	T
CDKN2A	0.322782	11.3678	7.73987	0.000562217	0.0176033	0.294999	T
PEBP4	-0.840132	5.63678	-7.73139	0.000565117	0.0176033	0.289279	T
GLRX	-0.559551	7.49154	-7.7251	0.000567277	0.0176033	0.285036	T
LOC101748546	0.512822	9.14782	7.72156	0.000568497	0.0176033	0.282647	T
CCDC91	0.327754	6.17852	7.72089	0.00056873	0.0176033	0.282191	T
B3GNT4	0.831684	6.29215	7.71439	0.000570979	0.0176033	0.277803	T
ALDH1A2	-0.681149	8.46042	-7.70934	0.000572737	0.0176033	0.274383	T
LOC121110126	-0.81052	4.37662	-7.70869	0.000572962	0.0176033	0.273945	T
FKBP1A	0.377556	11.8267	7.70315	0.000574898	0.0176033	0.270195	T
LOC769317	-1.05678	1.31089	-7.6994	0.000576209	0.0176033	0.26766	T
CCDC89	-1.05678	1.31089	-7.6994	0.000576209	0.0176033	0.26766	T
HOXA10-AS	-1.05678	1.31089	-7.6994	0.000576209	0.0176033	0.26766	T
LOC121108712	-1.05678	1.31089	-7.6994	0.000576209	0.0176033	0.26766	T
PMFBP1	-1.05678	1.31089	-7.6994	0.000576209	0.0176033	0.26766	T
CTTNBP2	0.594762	6.93744	7.673	0.000585562	0.0178552	0.249746	T
SPHKAP	-0.460836	8.91059	-7.66858	0.000587145	0.0178698	0.246742	T
GABBR2	-0.931099	3.41386	-7.6632	0.000589079	0.0178949	0.243083	T
LOC107054677	-0.553603	6.42558	-7.654	0.000592401	0.0179621	0.236825	T
HECTD2	-0.306021	9.48845	-7.6485	0.000594402	0.0179716	0.233071	T
TBX1	-0.398363	9.02511	-7.64322	0.000596325	0.0179716	0.229477	T
CD180	1.02726	6.89524	7.64185	0.000596826	0.0179716	0.228541	T
CMIP	0.363077	10.4609	7.64093	0.000597164	0.0179716	0.227912	T
COL5A1	1.91443	4.39601	7.62922	0.000601466	0.0180675	0.219921	T
DAW1	-0.553233	5.59374	-7.62128	0.000604405	0.0181036	0.214493	T
PEAR1	3.60905	2.33702	7.61993	0.000604909	0.0181036	0.213567	T
CARF	-0.40881	8.92238	-7.61615	0.000606316	0.0181119	0.210978	T
CCR2	0.676984	7.92956	7.61317	0.000607428	0.0181119	0.208939	T
LOC101751304	4.58103	2.82301	7.60811	0.000609319	0.0181348	0.205478	T
LOC428417	-0.2884	10.2518	-7.5866	0.000617445	0.01829	0.190724	T
CRYBB1	0.824415	7.42591	7.58639	0.000617525	0.01829	0.19058	T
NRBP2	0.446183	8.76539	7.58534	0.000617927	0.01829	0.189855	T
KMT5A	-0.307404	8.57119	-7.58151	0.00061939	0.0182997	0.187221	T
ATF3	-0.321652	9.87201	-7.56961	0.000623956	0.0183956	0.179038	T
C1orf101	1.39033	5.23255	7.56345	0.000626338	0.0183956	0.174794	T
CYP3A5	-0.308178	12.8962	-7.56144	0.000627117	0.0183956	0.173409	T
TMEM140	0.826575	7.20951	7.55982	0.000627742	0.0183956	0.172299	T
ADORA2B	-0.334441	13.0674	-7.55833	0.000628325	0.0183956	0.171265	T
ITGB5	0.488973	9.99975	7.55047	0.000631386	0.0184518	0.165849	T
LOC112533095	1.46227	5.43063	7.54074	0.000635205	0.0184924	0.15913	T
SNX1	0.281793	9.38662	7.53822	0.000636199	0.0184924	0.157387	T
KCTD12	0.335991	10.6817	7.53681	0.000636754	0.0184924	0.156415	T
LOC121107830	1.01409	7.14474	7.5353	0.000637353	0.0184924	0.155368	T
LOC112531638	0.959461	5.23818	7.52302	0.00064223	0.0186005	0.146872	T
SSH2	0.267794	10.0396	7.50508	0.000649431	0.0187754	0.134442	T
POU6F1	-0.380554	6.38932	-7.49931	0.000651769	0.0188	0.130436	T
SLC36A1	0.408663	9.32376	7.49725	0.000652608	0.0188	0.129002	T
ADIPOQ	-0.684099	6.59327	-7.49305	0.000654317	0.0188098	0.126086	T
MYOF	-0.609033	12.4013	-7.4907	0.000655277	0.0188098	0.124452	T
AK9	1.45174	4.62874	7.48484	0.000657678	0.0188371	0.120374	T
HOXD10	-0.485792	9.46292	-7.48029	0.000659546	0.0188371	0.117211	T
LOC107049489	-0.749805	3.98673	-7.47985	0.000659726	0.0188371	0.116907	T
KIAA1549L	0.708562	5.48079	7.46963	0.000663951	0.0189045	0.109787	T
PSEN1	-0.400673	9.58683	-7.46769	0.000664759	0.0189045	0.10843	T
C19orf35	0.782212	6.78719	7.46568	0.000665595	0.0189045	0.107029	T
TREM2	2.29497	6.06548	7.45351	0.000670684	0.0190016	0.0985338	T
GK5	-0.491344	8.11056	-7.44862	0.000672739	0.0190016	0.0951207	T
SHC4	0.424748	9.13099	7.44717	0.000673348	0.0190016	0.0941106	T
PDXK	-0.276506	11.988	-7.4463	0.000673716	0.0190016	0.0935018	T
SOCS2	-0.294276	10.3686	-7.43022	0.000680548	0.0191609	0.0822442	T
MIR1644	3.19334	1.86292	7.42107	0.000684468	0.0192174	0.0758361	T
SMARCB1	-0.335095	9.74859	-7.41858	0.000685543	0.0192174	0.0740855	T
GSL	-0.291944	11.1693	-7.41724	0.000686122	0.0192174	0.0731431	T
LOC121108020	-0.842978	5.01845	-7.41288	0.000688003	0.0192367	0.0700884	T
LOC107049145	-1.00508	2.99237	-7.4099	0.000689293	0.0192395	0.0679971	T
ADAR	0.274182	10.3377	7.40355	0.000692055	0.0192833	0.0635343	T
DNAH17	-0.368658	12.8592	-7.38784	0.000698943	0.0194079	0.0524807	T
DENND4A	-0.459193	10.8954	-7.3877	0.000699007	0.0194079	0.0523779	T
PLCB2	0.759765	7.82246	7.38367	0.000700787	0.0194079	0.0495393	T
LOC121111002	-0.918432	3.11636	-7.38243	0.000701333	0.0194079	0.0486701	T
TNIP2	-0.437548	9.92397	-7.37828	0.000703176	0.019412	0.0457398	T
MCM3	0.274677	11.3447	7.37507	0.000704601	0.019412	0.0434799	T
LOC107053581	-0.56955	5.31165	-7.37097	0.000706431	0.019412	0.0405835	T
LOC112531619	3.13102	2.98908	7.36899	0.000707317	0.019412	0.0391845	T
TRPM2	-0.290277	11.4556	-7.36535	0.000708947	0.019412	0.0366149	T
LOC121107894	-0.626046	5.89329	-7.36306	0.000709971	0.019412	0.0350029	T
CST7	-0.418453	8.73807	-7.3615	0.000710672	0.019412	0.0339003	T
CTDSP1	0.363147	10.1039	7.35468	0.000713749	0.019412	0.029077	T
ORMDL3	-0.275502	9.69289	-7.35428	0.000713928	0.019412	0.028796	T
SEC14L5	-0.306437	9.98787	-7.35351	0.000714277	0.019412	0.0282512	T
LOC101749173	-0.616574	7.12825	-7.3493	0.000716186	0.019412	0.0252706	T
ERMARD	0.664172	7.36573	7.34876	0.000716432	0.019412	0.0248867	T
MARVELD1	-0.335354	9.37898	-7.34381	0.000718681	0.0194224	0.021386	T
LOC124417601	-0.564545	4.10562	-7.33372	0.000723299	0.0195146	0.0142328	T
SRRL	-0.583233	5.58222	-7.3304	0.000724824	0.0195231	0.0118803	T
LMOD1	2.4003	4.06304	7.32072	0.000729298	0.0195829	0.00500632	T
ARID5A	-0.469735	9.11017	-7.32036	0.000729467	0.0195829	0.00474824	T
INHBB	-0.684131	6.65908	-7.31545	0.000731746	0.0196115	0.00126358	T
CCNDBP1	-0.310353	11.0755	-7.30311	0.000737518	0.0197335	-0.00751394	T
STX11	-0.495956	8.53724	-7.29766	0.000740087	0.0197695	-0.0113998	T
LOC112530597	-0.776432	2.39789	-7.27696	0.000749931	0.0199994	-0.0261645	T
ANGPT1	1.32154	4.32165	7.26736	0.000754546	0.0200893	-0.033022	T
LPCAT2	-0.373014	10.1865	-7.25925	0.000758476	0.0201149	-0.0388272	T
NCAPH2	0.314487	9.9974	7.25792	0.000759125	0.0201149	-0.0397835	T
CD44	-0.521697	11.4924	-7.25703	0.000759554	0.0201149	-0.0404155	T
LOC121108011	-0.404624	9.43182	-7.25512	0.000760487	0.0201149	-0.0417875	T
LOC422214	-0.334008	10.3877	-7.24404	0.000765908	0.0201737	-0.0497282	T
LOC112532907	-1.01229	2.63656	-7.24398	0.000765937	0.0201737	-0.0497707	T
P3H2	1.0483	3.53771	7.24008	0.000767854	0.0201737	-0.0525656	T
QPCT	0.399242	10.4142	7.23964	0.000768074	0.0201737	-0.052886	T
IL4I1	-0.785433	6.94246	-7.23786	0.00076895	0.0201737	-0.0541602	T
ADGRL4	2.57493	1.55371	7.22886	0.000773408	0.0202133	-0.0606226	T
LOC112533031	0.712679	5.97273	7.22725	0.000774211	0.0202133	-0.0617838	T
FBXO5	0.378412	8.02936	7.22208	0.00077679	0.0202303	-0.0655026	T
LOC121106673	-0.99789	4.28238	-7.21726	0.000779202	0.0202303	-0.0689687	T
LOC107049245	1.28511	5.03254	7.21711	0.000779277	0.0202303	-0.069077	T
ACVR2B	-0.420931	6.40986	-7.21312	0.000781282	0.0202303	-0.0719497	T
LOC121107355	-0.648754	4.08034	-7.20587	0.00078494	0.0202303	-0.0771743	T
ZYX	-0.301974	11.4174	-7.20546	0.000785149	0.0202303	-0.0774714	T
UNC13B	-0.465176	8.16621	-7.205	0.00078538	0.0202303	-0.0778001	T
LOC107052062	2.0219	4.77574	7.20498	0.000785391	0.0202303	-0.0778163	T
OSBPL8	0.284683	11.9239	7.20232	0.000786737	0.0202303	-0.079731	T
LOC121108149	-0.506818	5.18834	-7.20105	0.000787382	0.0202303	-0.080648	T
GSTA3	0.489641	8.89733	7.1978	0.000789035	0.0202406	-0.0829934	T
KLF4	0.834886	8.63713	7.18986	0.00079309	0.0203124	-0.0887268	T
TESC	-0.739167	6.02212	-7.18676	0.000794675	0.0203208	-0.0909605	T
GPR141	1.13045	6.11934	7.18195	0.00079715	0.0203519	-0.094439	T
LECT2	-0.574483	15.8925	-7.17908	0.000798632	0.0203575	-0.0965162	T
AS3MT	0.314207	8.69903	7.15989	0.000808611	0.0205795	-0.11041	T
ITSN1	0.47532	9.54516	7.14421	0.000816877	0.0207139	-0.121791	T
EMP1	2.41516	4.86119	7.14068	0.000818754	0.0207139	-0.124359	T
CUL5	0.281477	9.67738	7.13921	0.000819534	0.0207139	-0.125424	T
PRPS2	-0.268748	8.28661	-7.138	0.000820181	0.0207139	-0.126308	T
FAM162A	0.297164	8.45716	7.13571	0.000821402	0.0207139	-0.127973	T
ATP5J2	-0.326748	8.94481	-7.13537	0.000821582	0.0207139	-0.128218	T
PROK2	-0.776424	8.89117	-7.12385	0.00082776	0.0207475	-0.136602	T
NACC2	0.460136	9.18571	7.12331	0.000828051	0.0207475	-0.136996	T
LOC121111432	-1.09107	2.31868	-7.10737	0.000836695	0.0208704	-0.148621	T
GPR158	-0.504272	8.3943	-7.10609	0.000837394	0.0208704	-0.149556	T
SFPQ	0.284374	12.3212	7.10519	0.000837887	0.0208704	-0.150215	T
LOC121109130	0.534626	5.69004	7.10476	0.000838121	0.0208704	-0.150527	T
MARCKSL1	-0.491549	9.16787	-7.09876	0.000841408	0.020893	-0.15491	T
MTSS1	0.332445	9.6542	7.08618	0.000848352	0.0209636	-0.164112	T
PDLIM5	-0.283265	11.4114	-7.0734	0.000855475	0.021069	-0.173474	T
SLC4A2	0.34717	11.4131	7.07289	0.000855758	0.021069	-0.173846	T
PAG1	0.286187	10.1086	7.06789	0.000858568	0.021069	-0.177517	T
LOC107050303	-0.415473	6.98627	-7.06728	0.000858909	0.021069	-0.177962	T
LAMP5	-0.51019	10.3027	-7.06688	0.000859132	0.021069	-0.178253	T
DOP1B	-0.278906	9.97111	-7.0617	0.000862055	0.0211086	-0.182056	T
ABHD12B	0.316543	8.12421	7.05236	0.000867356	0.0211801	-0.188922	T
SLC35F2	-0.379412	8.74169	-7.04438	0.00087191	0.0211801	-0.194788	T
DLGAP4	0.327782	10.0793	7.04374	0.000872276	0.0211801	-0.195259	T
DCSTAMP	2.23907	3.35445	7.04327	0.000872547	0.0211801	-0.195607	T
LIPA	0.341359	10.6002	7.03971	0.000874592	0.0211801	-0.198229	T
VASH1	0.288447	12.5686	7.03847	0.000875307	0.0211801	-0.199144	T
LOC112532440	0.797805	5.74175	7.03579	0.000876847	0.0211801	-0.201113	T
LOC121110138	-0.968188	4.08799	-7.03527	0.00087715	0.0211801	-0.201501	T
LOC112533010	-0.283744	6.4174	-7.03475	0.000877446	0.0211801	-0.201878	T
SLC2A4RG	0.463875	7.51942	7.03023	0.000880059	0.0211801	-0.20521	T
MGMT	0.278006	9.98514	7.02913	0.000880701	0.0211801	-0.206026	T
IL18RAP	-1.07659	3.55186	-7.02603	0.000882497	0.0211917	-0.208309	T
BATF3	-0.768029	9.6026	-7.02148	0.000885149	0.0212239	-0.211671	T
ENTPD2	0.291666	10.8202	7.01303	0.000890088	0.0212864	-0.217906	T
CDK18	0.511526	8.82544	7.00737	0.00089342	0.0213273	-0.222093	T
CPNE8	-0.399362	8.07144	-6.99513	0.000900671	0.0214686	-0.231151	T
POLE2	0.316367	9.42856	6.99072	0.0009033	0.0214697	-0.234418	T
ZXDC	0.393913	8.87201	6.98857	0.000904585	0.0214697	-0.23601	T
GRK4	0.393341	12.3779	6.98692	0.000905576	0.0214697	-0.237238	T
LOC100857706	-0.413261	8.27264	-6.98616	0.000906029	0.0214697	-0.237799	T
IRF1	-0.378701	8.98118	-6.98179	0.000908655	0.0214716	-0.241043	T
ARL10	-0.503883	7.48206	-6.9816	0.000908767	0.0214716	-0.24118	T
LOC121108850	-0.668144	7.19889	-6.97388	0.000913426	0.0214913	-0.246913	T
MAP3K8	-0.549556	8.55659	-6.97227	0.000914401	0.0214913	-0.248108	T
UHRF1	0.366884	11.3864	6.97204	0.000914539	0.0214913	-0.248278	T
LBH	-0.725461	7.39898	-6.97141	0.000914918	0.0214913	-0.248742	T
KANK4	0.331989	9.01103	6.95716	0.000923609	0.0216639	-0.259341	T
C15orf39	0.633145	7.06405	6.95471	0.000925117	0.0216679	-0.26117	T
LOC101750502	-0.469521	6.50792	-6.93242	0.000938928	0.0218961	-0.277785	T
PRLHR	0.795536	5.93339	6.92465	0.000943803	0.0219781	-0.283592	T
RSRP1	-0.288231	10.1984	-6.91963	0.000946969	0.0220201	-0.287348	T
LOC107049782	2.04159	1.28705	6.91523	0.000949752	0.0220285	-0.290639	T
ST6GAL2	-0.269623	11.1193	-6.91271	0.000951346	0.0220285	-0.29252	T
ATCAY	-0.392113	7.39531	-6.90704	0.000954958	0.0220788	-0.296771	T
PLD4	2.73217	3.65606	6.89749	0.000961071	0.0221839	-0.303927	T
MYLK2	0.647528	5.79192	6.89566	0.000962252	0.0221839	-0.305305	T
CRY2	-0.28835	9.67697	-6.89132	0.000965046	0.0222167	-0.308558	T
GINS1	0.40666	8.37337	6.88499	0.000969143	0.0222793	-0.31331	T
LOC107052945	-0.580615	4.92694	-6.87832	0.000973485	0.0223066	-0.318325	T
SEPTIN11	0.509035	9.5002	6.878	0.000973693	0.0223066	-0.318565	T
FANCF	0.355684	8.12488	6.87681	0.000974473	0.0223066	-0.319463	T
ANKH	0.35129	9.19346	6.87269	0.000977166	0.0223366	-0.322559	T
MPZL2	0.546764	6.47837	6.8657	0.000981762	0.02241	-0.327825	T
RASAL3	0.278223	9.84029	6.85135	0.000991271	0.0225951	-0.338641	T
KCNJ2	-0.384171	7.77038	-6.84859	0.000993113	0.0226014	-0.340724	T
TEX2L	0.374428	7.20823	6.84675	0.000994346	0.0226014	-0.342116	T
FOXK1	-0.382971	11.0158	-6.84131	0.000997994	0.0226522	-0.346227	T
NCOA4	0.474072	10.5785	6.83924	0.000999384	0.0226522	-0.347788	T
CAPNS2	-0.477017	7.08332	-6.83318	0.00100347	0.0227131	-0.352373	T
HOXA1	-0.313061	7.68156	-6.83057	0.00100524	0.0227212	-0.354344	T
DNAI1	0.903822	5.18731	6.82772	0.00100717	0.0227332	-0.356504	T
TICAM1	-0.378248	8.76527	-6.82028	0.00101225	0.022784	-0.362142	T
TMTC2	-0.344107	9.49397	-6.81296	0.00101726	0.0228651	-0.367691	T
ATP6V0D2	1.19237	6.10417	6.81054	0.00101893	0.0228707	-0.369526	T
UVRAG	0.32243	10.2856	6.80835	0.00102043	0.0228727	-0.371186	T
NUMB	-0.276406	11.1937	-6.80305	0.0010241	0.0229058	-0.375211	T
LOC776594	-0.902468	3.25781	-6.79963	0.00102647	0.0229058	-0.377806	T
IPMK	0.348692	9.92584	6.79759	0.00102789	0.0229058	-0.379356	T
PSTPIP1	0.429817	10.8591	6.7965	0.00102865	0.0229058	-0.380189	T
FAM107B	-0.405066	12.054	-6.79416	0.00103028	0.0229058	-0.381962	T
LOC421268	-0.925761	5.52087	-6.79396	0.00103042	0.0229058	-0.382114	T
YPEL2	-0.297526	9.00241	-6.79169	0.00103201	0.0229097	-0.383846	T
DEFB4A	-0.391245	14.7127	-6.78292	0.00103816	0.0229179	-0.390517	T
PP2D1	-0.811018	3.13459	-6.78136	0.00103926	0.0229179	-0.391707	T
IFNGR2	-0.294141	10.1598	-6.78106	0.00103947	0.0229179	-0.391935	T
TROJANZ	0.785994	8.63828	6.7719	0.00104595	0.0230251	-0.398914	T
SCNN1D	-0.453619	9.05744	-6.7664	0.00104986	0.0230251	-0.40311	T
CKAP2L	0.319182	9.17646	6.76299	0.0010523	0.0230251	-0.405716	T
LOC107052931	0.715139	5.60897	6.76269	0.00105251	0.0230251	-0.40594	T
TUBB1	0.61816	7.34871	6.76218	0.00105288	0.0230251	-0.406328	T
AKAP12	-0.90473	1.23486	-6.75195	0.00106023	0.0230301	-0.414147	T
LOC107051651	-0.90473	1.23486	-6.75195	0.00106023	0.0230301	-0.414147	T
LOC124417876	-0.90473	1.23486	-6.75195	0.00106023	0.0230301	-0.414147	T
SLC2A2	-0.90473	1.23486	-6.75195	0.00106023	0.0230301	-0.414147	T
TAS1R3	-0.90473	1.23486	-6.75195	0.00106023	0.0230301	-0.414147	T
TRMT2B	-0.305653	7.35695	-6.74729	0.0010636	0.0230682	-0.417712	T
LOC112532892	0.943656	5.60896	6.74373	0.00106618	0.0230682	-0.420435	T
BIK	-0.441989	7.53182	-6.74362	0.00106627	0.0230682	-0.420522	T
LOC107051953	0.507896	6.39196	6.73899	0.00106964	0.0230701	-0.424067	T
LOC417937	-0.354914	7.92612	-6.73752	0.00107071	0.0230701	-0.425195	T
ITM2A	0.295813	12.8085	6.73654	0.00107142	0.0230701	-0.425939	T
MACIR	0.569574	7.52805	6.73566	0.00107206	0.0230701	-0.426613	T
LOC124417163	-1.13717	3.05841	-6.72611	0.00107908	0.0231902	-0.433941	T
C1S	-0.490009	9.81894	-6.7237	0.00108085	0.0231975	-0.435788	T
CHRNA6	-0.467786	6.89006	-6.70908	0.00109171	0.0233838	-0.447019	T
PHF2	-0.346204	7.24419	-6.70812	0.00109243	0.0233838	-0.447757	T
LOC107056270	0.652571	8.21337	6.7003	0.0010983	0.0234782	-0.453773	T
CACNB4	-0.339339	8.97816	-6.69373	0.00110325	0.023553	-0.458831	T
CASP10	-0.289705	6.62632	-6.68456	0.00111021	0.0236374	-0.465899	T
LOC124417941	-0.807352	4.15824	-6.68435	0.00111037	0.0236374	-0.466062	T
UCKL1	-0.291747	9.37035	-6.68275	0.00111159	0.0236374	-0.467295	T
DNAJC27	0.329155	8.54186	6.67499	0.00111754	0.0237014	-0.473289	T
CTSZ	0.490005	10.1933	6.66815	0.0011228	0.0237453	-0.478572	T
HCLS1	0.322724	12.5784	6.66662	0.00112399	0.0237453	-0.479761	T
LOC107049235	-1.21256	3.10487	-6.66659	0.00112401	0.0237453	-0.479782	T
LOC121110573	-0.51662	4.85502	-6.65749	0.00113107	0.0238632	-0.48682	T
LOC121106929	3.5671	2.81187	6.65052	0.00113652	0.0239469	-0.492222	T
BMPR2	0.356453	9.65097	6.64719	0.00113913	0.0239688	-0.494802	T
SBF2	-0.348939	10.1412	-6.64542	0.00114052	0.0239688	-0.496177	T
IFFO2	-0.313389	9.81697	-6.64082	0.00114415	0.0240072	-0.499741	T
PIM3	-0.434171	10.9819	-6.63834	0.0011461	0.0240072	-0.501664	T
B3GNT2	-0.279682	11.3186	-6.63582	0.0011481	0.0240072	-0.503623	T
LOC107054341	-1.01296	2.27963	-6.63558	0.00114829	0.0240072	-0.503808	T
VIPR1	0.426142	7.85147	6.63103	0.0011519	0.0240192	-0.507339	T
LOC121107964	-0.329219	8.18308	-6.63025	0.00115253	0.0240192	-0.507951	T
CKB	-0.288782	12.3467	-6.62788	0.00115442	0.0240192	-0.509788	T
GCH1	-0.666666	9.41137	-6.62624	0.00115573	0.0240192	-0.511063	T
LOC121108671	1.57475	6.08688	6.62422	0.00115734	0.0240192	-0.512635	T
MOB3C	-0.297947	9.199	-6.62301	0.00115831	0.0240192	-0.513577	T
LOC121108132	-0.482417	6.39044	-6.62181	0.00115927	0.0240192	-0.514507	T
TMEM189	-0.306876	10.3274	-6.61669	0.00116339	0.0240736	-0.518492	T
LAMB3	-1.04871	4.62839	-6.60655	0.00117159	0.0241456	-0.526392	T
HMGCR	-0.299996	12.3727	-6.60507	0.00117279	0.0241456	-0.527548	T
KRT10	1.08095	5.6971	6.60267	0.00117474	0.0241456	-0.529413	T
POLR3E	-0.267693	9.21602	-6.60265	0.00117476	0.0241456	-0.529433	T
NBL1	0.509395	7.18527	6.59617	0.00118005	0.0241456	-0.534484	T
NT5DC2	0.362212	10.7087	6.59536	0.00118071	0.0241456	-0.535117	T
BBIP1	1.23568	5.9629	6.59388	0.00118193	0.0241456	-0.536275	T
ZC3H12A	-0.321123	13.3638	-6.59216	0.00118335	0.0241456	-0.537622	T
C4H4ORF46	0.326159	9.05596	6.59141	0.00118396	0.0241456	-0.538206	T
LOC112532633	-0.648254	5.87192	-6.59043	0.00118477	0.0241456	-0.538972	T
IFIT5	1.14591	4.71012	6.5904	0.00118479	0.0241456	-0.538996	T
LPAR6	0.73248	4.72282	6.58803	0.00118674	0.0241548	-0.540844	T
AHRR	0.734229	7.57587	6.58468	0.00118951	0.0241806	-0.543461	T
LOC422320	1.14302	3.36184	6.58115	0.00119243	0.0242096	-0.546222	T
NCF1C	-0.519341	10.8301	-6.57872	0.00119445	0.0242202	-0.548125	T
PPARD	-0.325747	8.55277	-6.55601	0.00121349	0.0245755	-0.565918	T
LOC107054776	0.36686	9.22759	6.55274	0.00121626	0.0246007	-0.56848	T
HTRA3	-0.472275	6.64341	-6.55092	0.00121781	0.0246012	-0.569911	T
TPD52L2	-0.323964	11.0065	-6.54687	0.00122125	0.0246308	-0.573089	T
ZBTB45	0.622156	6.40175	6.54562	0.00122232	0.0246308	-0.574071	T
MESP1	1.389	5.76554	6.53218	0.00123386	0.0248324	-0.584648	T
CYP2U1	0.318522	8.05827	6.53019	0.00123558	0.024836	-0.586211	T
MIS18BP1	0.285985	9.82383	6.52014	0.00124431	0.0249494	-0.594132	T
RPS6KA2	0.438857	7.80126	6.51528	0.00124855	0.0250035	-0.597967	T
LOC420486	-0.903579	7.18251	-6.51041	0.00125282	0.0250407	-0.601808	T
BLVRA	4.18384	3.99926	6.50963	0.00125351	0.0250407	-0.602425	T
AQP10	2.45392	3.85179	6.49905	0.00126285	0.0251669	-0.610782	T
ABCC2	-1.04103	1.30301	-6.49569	0.00126584	0.0251669	-0.613442	T
LOC112531329	-1.04103	1.30301	-6.49569	0.00126584	0.0251669	-0.613442	T
CSGALNACT1	-0.422308	10.0575	-6.49545	0.00126605	0.0251669	-0.613631	T
LOC419276	-0.719906	11.2872	-6.48056	0.00127938	0.0253534	-0.625419	T
NOCT	0.30425	9.77525	6.47887	0.0012809	0.0253534	-0.626756	T
PTS	-0.481906	5.68836	-6.4781	0.0012816	0.0253534	-0.62737	T
LOC107050189	-0.819792	5.00037	-6.47716	0.00128245	0.0253534	-0.628114	T
SESN2	-0.338293	9.20183	-6.47536	0.00128407	0.0253534	-0.62954	T
EPB41L4B	1.26721	5.18389	6.47354	0.00128573	0.0253534	-0.630989	T
COL13A1	-0.530439	7.17252	-6.47244	0.00128672	0.0253534	-0.631856	T
HSD17B11	-0.340228	5.9874	-6.45923	0.00129877	0.0255345	-0.642349	T
LOC112532499	-0.775708	2.70382	-6.45605	0.00130169	0.0255608	-0.644877	T
LOC107050595	-0.485925	4.57221	-6.43724	0.00131912	0.0258403	-0.659854	T
LOC112531971	0.87972	5.28738	6.42912	0.00132673	0.0259266	-0.666335	T
EML4	-0.28259	9.25934	-6.42069	0.00133468	0.0260428	-0.673066	T
GGT2	-0.783962	7.44942	-6.41941	0.0013359	0.0260428	-0.674089	T
RNF144A	-0.381439	9.3162	-6.41116	0.00134374	0.0261327	-0.680685	T
LOC112533223	1.60504	4.87386	6.40785	0.00134691	0.0261627	-0.683332	T
CYP4V2	0.421349	7.21109	6.40484	0.00134979	0.0261872	-0.685741	T
ARHGEF37	1.04164	4.84126	6.39688	0.00135746	0.0262729	-0.692122	T
NR1D2	0.281957	8.83996	6.38928	0.00136482	0.0263522	-0.698212	T
UGP2	-0.277636	12.5467	-6.38371	0.00137025	0.026398	-0.702684	T
SIPA1L2	0.651422	7.35606	6.38258	0.00137136	0.026398	-0.703595	T
CA13	-0.558336	7.54933	-6.38096	0.00137294	0.026398	-0.704898	T
LIPI	-0.71754	4.18119	-6.37908	0.00137478	0.026398	-0.706407	T
ZMYM2	0.341081	8.80546	6.3785	0.00137535	0.026398	-0.706875	T
CCDC146	2.29577	1.41413	6.37195	0.0013818	0.0264798	-0.71214	T
LOC107054851	-0.462787	4.50838	-6.36918	0.00138453	0.0264798	-0.714368	T
ICOSLG	-0.683633	9.79745	-6.3643	0.00138937	0.0265408	-0.718296	T
FRMD6	-0.271809	8.2111	-6.35982	0.00139383	0.0265408	-0.721905	T
MSL2	0.36184	9.70125	6.35927	0.00139437	0.0265408	-0.722348	T
MAST3	0.453043	8.26925	6.3571	0.00139654	0.0265408	-0.724095	T
PRC1	0.299695	10.3316	6.35606	0.00139758	0.0265408	-0.724932	T
PLSCR1	-0.324112	12.6189	-6.35148	0.00140216	0.0265876	-0.728625	T
LOC769841	2.01138	1.53819	6.35032	0.00140333	0.0265876	-0.729563	T
LOC100858379	1.92414	2.93607	6.34732	0.00140634	0.0266011	-0.731977	T
MAP2K3	-0.275985	11.3589	-6.3435	0.0014102	0.0266011	-0.735065	T
TM4SF1	-0.498479	5.08646	-6.34308	0.00141063	0.0266011	-0.735404	T
SLA	1.73113	5.94923	6.33901	0.00141475	0.0266392	-0.738691	T
GRIA1	0.586079	5.71282	6.33783	0.00141594	0.0266392	-0.739643	T
FHAD1	3.6136	2.56415	6.33107	0.00142283	0.0267236	-0.745109	T
LOC112530128	-1.0016	2.12403	-6.33017	0.00142374	0.0267236	-0.745831	T
GAA	0.303841	9.38189	6.32617	0.00142784	0.0267421	-0.749069	T
FOXJ1	-0.626038	5.85081	-6.32437	0.00142969	0.0267421	-0.750529	T
TIA1	0.293669	11.2565	6.32218	0.00143194	0.0267533	-0.752303	T
LOC429249	2.65752	2.10917	6.31823	0.00143601	0.0267984	-0.755504	T
EPB41L1	0.289816	10.5567	6.31629	0.00143801	0.0268047	-0.757072	T
AvBD4	-0.34411	12.2424	-6.30789	0.00144672	0.0268759	-0.763879	T
KIAA1191	-0.308255	9.09841	-6.3078	0.00144682	0.0268759	-0.763953	T
MELTF	-0.516496	4.83721	-6.30165	0.00145324	0.0269643	-0.768947	T
MATK	0.301369	8.80839	6.29598	0.00145919	0.0270002	-0.77355	T
CDC45	0.298861	9.32355	6.29477	0.00146047	0.0270002	-0.77454	T
EVI2B	-0.450782	6.43492	-6.29194	0.00146345	0.0270002	-0.776837	T
FAM184B	0.88209	5.82354	6.29186	0.00146353	0.0270002	-0.776898	T
TXNDC17	-0.265466	9.38478	-6.29012	0.00146538	0.0270034	-0.77832	T
PGM3	-0.292825	9.82463	-6.28559	0.00147017	0.0270464	-0.781998	T
TRMT44	0.313642	7.43507	6.27969	0.00147645	0.0270839	-0.786804	T
DBNL	0.267806	11.1323	6.27802	0.00147823	0.0270858	-0.788162	T
STK31	0.935984	3.17094	6.27428	0.00148224	0.0271285	-0.791215	T
JUN	-0.290064	10.0569	-6.26923	0.00148765	0.0271968	-0.795325	T
LOC112533381	-0.776095	4.93806	-6.25322	0.001505	0.0274518	-0.808397	T
CXorf57	0.272615	11.8372	6.25045	0.00150803	0.0274761	-0.810664	T
TLN1	0.271955	13.0369	6.2478	0.00151093	0.0274979	-0.812831	T
SGPP1	-0.276015	10.3895	-6.24101	0.00151839	0.0275994	-0.818385	T
SH3PXD2A	-0.350672	6.73223	-6.23806	0.00152165	0.0275994	-0.820802	T
USP41	0.294286	10.8265	6.23709	0.00152272	0.0275994	-0.821597	T
LOC107049862	0.448429	9.8987	6.23396	0.00152619	0.0275994	-0.824159	T
TNFRSF18	0.435463	8.0432	6.23345	0.00152675	0.0275994	-0.824578	T
TRIM59	0.28987	10.9128	6.22883	0.00153189	0.0276613	-0.828367	T
CTSB	0.466869	10.7301	6.22668	0.00153429	0.0276737	-0.830129	T
GATC	0.27989	7.56809	6.22334	0.00153802	0.0277101	-0.83287	T
LOC112532879	-0.421965	6.23696	-6.22011	0.00154165	0.0277445	-0.835524	T
LOC101748706	0.336808	10.068	6.21551	0.00154681	0.0277755	-0.839295	T
RASSF6	0.729941	7.37199	6.2093	0.00155382	0.0277974	-0.844398	T
MTAP	0.471817	7.94505	6.2076	0.00155576	0.0277974	-0.8458	T
ANXA5	0.326352	10.1215	6.20683	0.00155663	0.0277974	-0.846431	T
LOC121110735	-0.455018	4.91872	-6.20503	0.00155867	0.0278033	-0.847914	T
COL6A3	0.337656	10.4305	6.2028	0.00156121	0.0278178	-0.84975	T
LOC107054930	-0.649875	3.0604	-6.19526	0.00156983	0.0279406	-0.85596	T
ALAS1	-0.360259	9.43486	-6.19286	0.00157259	0.0279588	-0.857936	T
PIGR	-0.946848	7.14151	-6.18348	0.0015834	0.0280855	-0.865665	T
ASCC1	-0.275214	8.99568	-6.18217	0.00158493	0.0280855	-0.866751	T
SLC45A3	0.337701	11.0114	6.17862	0.00158904	0.0281277	-0.869679	T
NLRC5	-0.339792	11.4374	-6.17153	0.00159731	0.02821	-0.875532	T
SRSF4	0.3191	8.63602	6.16866	0.00160068	0.02821	-0.877908	T
AOAH	0.441556	8.4451	6.16688	0.00160277	0.028216	-0.879379	T
FOS	0.575596	10.4245	6.16195	0.00160858	0.0282875	-0.88346	T
ETV1	1.37749	5.62396	6.15696	0.00161447	0.0283507	-0.887588	T
STMN1	0.488899	9.35507	6.1553	0.00161644	0.0283507	-0.888961	T
GRPEL2	-0.345299	7.52951	-6.15151	0.00162094	0.0283507	-0.892101	T
ATXN10	0.407129	7.92553	6.14156	0.00163285	0.0284972	-0.900355	T
NDC80	0.290924	9.94896	6.13523	0.00164046	0.0285377	-0.905607	T
CLSTN1	-0.280898	10.757	-6.12424	0.0016538	0.0287079	-0.914742	T
FUCA2	0.371797	8.43886	6.12087	0.00165791	0.0287291	-0.917544	T
SPIN1	0.28125	9.63502	6.1127	0.00166793	0.028826	-0.924347	T
ADGRL2	-0.325134	9.2814	-6.11092	0.00167013	0.028826	-0.925831	T
SNRNP25	-0.317859	8.56569	-6.10825	0.00167342	0.0288317	-0.928053	T
LOC121109707	1.30184	3.66581	6.10534	0.00167703	0.0288631	-0.930482	T
NXPH2	-0.414596	6.53282	-6.10197	0.00168121	0.0289043	-0.933292	T
LOC107050476	1.0461	4.26773	6.09049	0.00169556	0.029089	-0.942883	T
LOC107053675	-0.561271	7.13126	-6.082	0.00170625	0.0291914	-0.949978	T
LOC107054183	2.15209	3.46322	6.0807	0.00170789	0.0291914	-0.951062	T
LOC124417076	-1.08167	3.11173	-6.08002	0.00170875	0.0291914	-0.951631	T
ATP2A3	0.288446	10.9846	6.07636	0.0017134	0.0292013	-0.954698	T
SLC26A2	-0.384308	11.0841	-6.07448	0.00171579	0.0292013	-0.956274	T
LOC124417381	-0.852167	2.91674	-6.07295	0.00171774	0.0292013	-0.957553	T
LOC422513	0.484955	8.77684	6.07119	0.00171998	0.0292013	-0.959025	T
HRAS	-0.368557	10.9659	-6.07104	0.00172017	0.0292013	-0.95915	T
TDRKH	1.1027	5.16248	6.06485	0.00172811	0.0292015	-0.964346	T
MITD1	0.39549	8.51831	6.06408	0.00172909	0.0292015	-0.964992	T
J6367_mgt16	-1.15409	2.80382	-6.06382	0.00172943	0.0292015	-0.965209	T
HS6ST3	-0.7023	3.79323	-6.06173	0.00173211	0.0292015	-0.96696	T
HMCN1	0.306647	8.03834	6.06117	0.00173283	0.0292015	-0.967428	T
LY6E	0.33188	10.8453	6.05945	0.00173505	0.0292085	-0.968874	T
CYP21A1	0.518113	7.59839	6.05308	0.00174329	0.0293166	-0.97422	T
FAM198B	2.19102	1.36176	6.04951	0.00174793	0.0293641	-0.977221	T
GRK3	0.356502	12.6947	6.04748	0.00175057	0.0293779	-0.978924	T
CCNE1	-0.28398	6.81958	-6.04438	0.00175461	0.0294153	-0.981531	T
AMPD3	-0.28759	10.099	-6.03508	0.00176683	0.0295136	-0.989361	T
ATP6V1G3	0.309015	10.7295	6.03448	0.00176761	0.0295136	-0.989859	T
LOC124417193	-0.608116	3.18	-6.03158	0.00177144	0.0295136	-0.992305	T
LY86	0.340153	13.9934	6.02598	0.00177886	0.0295775	-0.997026	T
MBNL1	0.275403	13.3324	6.0249	0.0017803	0.0295775	-0.997939	T
CCDC102A	0.447922	8.52975	6.02272	0.0017832	0.0295775	-0.999774	T
KRT23	1.45428	4.12335	6.02189	0.0017843	0.0295775	-1.00047	T
CD36	0.428029	6.3079	6.0218	0.00178442	0.0295775	-1.00055	T
TIMM10B	-0.284524	8.62473	-6.01957	0.00178739	0.0295963	-1.00243	T
LOC769617	-0.393172	10.4645	-6.01751	0.00179015	0.0296117	-1.00417	T
IRF5	0.417563	9.69421	6.0146	0.00179404	0.0296458	-1.00662	T
PCBP3	-0.599758	4.75525	-6.00772	0.00180331	0.0297103	-1.01244	T
TSPO	-0.285491	11.4633	-6.00438	0.00180782	0.0297103	-1.01526	T
S100A16	-0.269287	10.3046	-6.00405	0.00180826	0.0297103	-1.01554	T
LOC101749277	-0.717649	3.08451	-6.00353	0.00180898	0.0297103	-1.01598	T
LOC121107932	-0.536229	5.97468	-6.00058	0.00181297	0.0297456	-1.01847	T
SLC4A1	-0.987756	4.06069	-5.99906	0.00181503	0.0297493	-1.01976	T
GBP1	0.283331	10.516	5.99723	0.00181754	0.0297601	-1.02131	T
GALNT16	-0.338681	7.89641	-5.99366	0.0018224	0.0298096	-1.02433	T
EPGN	0.700959	6.9544	5.98508	0.00183417	0.0299717	-1.0316	T
ZNF226L	-0.826278	1.88645	-5.98033	0.00184072	0.0300484	-1.03563	T
PGAM1	0.275505	14.5457	5.97247	0.00185164	0.0301961	-1.0423	T
LOC101750540	3.02186	2.02509	5.96593	0.00186076	0.0303143	-1.04786	T
GREB1L	-0.561015	6.806	-5.96382	0.00186373	0.030332	-1.04965	T
DUSP8	-0.755374	6.96838	-5.96144	0.00186707	0.0303482	-1.05168	T
LOC124417313	-0.970571	2.95805	-5.95269	0.00187942	0.0304647	-1.05912	T
PNRC1	-0.274932	10.4357	-5.95134	0.00188132	0.030465	-1.06027	T
ADAMTSL2	-0.337345	9.2815	-5.94823	0.00188575	0.0305061	-1.06292	T
NFIB	0.686033	6.7892	5.9357	0.00190368	0.0307346	-1.07361	T
LOC107050775	-0.366201	8.9008	-5.92477	0.00191947	0.0308704	-1.08294	T
COL15A1	0.306499	9.47224	5.92459	0.00191973	0.0308704	-1.0831	T
ATP1B1	0.266325	9.38638	5.92063	0.0019255	0.0309141	-1.08649	T
LOC121108010	-0.757378	5.66219	-5.9201	0.00192627	0.0309141	-1.08694	T
LOC121109404	-0.579643	3.77511	-5.91616	0.00193202	0.0309718	-1.09031	T
PUS10	0.321644	7.24441	5.91496	0.00193379	0.0309718	-1.09134	T
CDCA7	0.290872	10.9823	5.91371	0.00193562	0.0309718	-1.09241	T
AKAP8	0.271165	10.5069	5.9107	0.00194004	0.0310118	-1.09499	T
GRASP	-0.503894	8.52524	-5.90656	0.00194614	0.0310479	-1.09853	T
LOC121111245	-0.723349	5.47225	-5.89934	0.00195683	0.0311263	-1.10472	T
CREB1	-0.292029	11.3613	-5.89111	0.00196911	0.0312908	-1.11179	T
CREM	-0.509945	8.30205	-5.87755	0.00198952	0.0314175	-1.12344	T
LOC121107777	-0.888979	1.22699	-5.87525	0.00199301	0.0314175	-1.12542	T
LOC124417432	-0.888979	1.22699	-5.87525	0.00199301	0.0314175	-1.12542	T
UCP3	-0.888979	1.22699	-5.87525	0.00199301	0.0314175	-1.12542	T
LOC121108873	-0.888979	1.22699	-5.87525	0.00199301	0.0314175	-1.12542	T
PLBD1	-0.888979	1.22699	-5.87525	0.00199301	0.0314175	-1.12542	T
LRRC47	0.286879	9.61738	5.87502	0.00199336	0.0314175	-1.12562	T
AvBD5	-0.526192	10.884	-5.87422	0.00199458	0.0314175	-1.12631	T
LOC422154	-0.381266	5.29276	-5.87257	0.00199709	0.0314252	-1.12773	T
SYK	0.279105	8.96625	5.86689	0.00200575	0.0315014	-1.13262	T
CH25H	-0.568326	7.48036	-5.86385	0.0020104	0.0315438	-1.13524	T
GRTP1	-0.271829	7.85562	-5.85377	0.00202593	0.0316952	-1.14394	T
ARHGEF3	-0.269147	8.31164	-5.84938	0.00203275	0.0317403	-1.14773	T
LOC121110868	-0.676165	2.45225	-5.84497	0.00203961	0.0318168	-1.15154	T
CD86	-0.449511	5.97596	-5.84003	0.00204734	0.0319066	-1.15582	T
GALC	-0.362755	9.14028	-5.8278	0.0020666	0.0321446	-1.1664	T
SPATA2L	0.377025	9.35699	5.82138	0.00207681	0.0322458	-1.17197	T
CRELD1	0.286561	9.83672	5.81995	0.00207909	0.0322458	-1.17321	T
LOC121107985	-0.975333	3.83571	-5.81861	0.00208123	0.0322481	-1.17437	T
SCARF1	0.271819	9.11316	5.81633	0.00208487	0.0322494	-1.17635	T
LMF2	0.325883	12.8821	5.81606	0.00208531	0.0322494	-1.17658	T
SVOPL	1.49506	1.28003	5.81157	0.0020925	0.0322989	-1.18048	T
MTCL1	0.561374	6.39854	5.80337	0.00210573	0.0324721	-1.1876	T
LOC121106475	0.945088	5.30574	5.80138	0.00210897	0.032491	-1.18934	T
BTBD11	-0.285375	11.2425	-5.796	0.00211771	0.0325945	-1.19401	T
TEX9	0.481104	6.78169	5.79245	0.00212351	0.0326233	-1.1971	T
TADA1	0.342874	8.39887	5.79239	0.00212361	0.0326233	-1.19716	T
ZNFY3	-1.07549	2.16097	-5.78851	0.00212996	0.0326897	-1.20053	T
PECAM1	0.809981	10.2611	5.78602	0.00213406	0.0327204	-1.2027	T
THRB	-0.467345	10.6098	-5.78304	0.00213896	0.0327346	-1.2053	T
SELP	0.410916	8.08485	5.78058	0.00214302	0.0327657	-1.20744	T
LOC121108663	4.27146	2.40198	5.77614	0.00215039	0.0328473	-1.21132	T
C1QBP	-0.289276	11.9408	-5.77156	0.002158	0.0329324	-1.21531	T
RARRES1	0.471825	7.27026	5.76026	0.00217694	0.0331902	-1.2252	T
CYTIP	1.00019	5.66501	5.74857	0.00219673	0.0334603	-1.23543	T
LOC121109666	-1.07971	2.16309	-5.74468	0.00220335	0.0335296	-1.23883	T
KAT6B	0.668054	7.53082	5.74247	0.00220713	0.0335443	-1.24077	T
ETV6	-0.287028	9.76585	-5.74061	0.00221032	0.0335443	-1.2424	T
METTL23	-0.291605	6.54402	-5.74048	0.00221055	0.0335443	-1.24252	T
ZNF462	0.546207	8.35187	5.73794	0.00221492	0.033579	-1.24475	T
PIAS1	0.273626	9.81172	5.73389	0.00222189	0.0336458	-1.2483	T
LOC417536	-0.920559	3.53092	-5.72617	0.00223524	0.0336975	-1.25508	T
LOC112533527	1.43059	4.36015	5.72136	0.00224361	0.0337408	-1.2593	T
LOC121109571	-0.374675	6.7506	-5.72109	0.00224409	0.0337408	-1.25954	T
C16orf59	0.576711	8.18938	5.72093	0.00224437	0.0337408	-1.25969	T
LOC124418027	-0.853768	2.34995	-5.71377	0.00225691	0.0338976	-1.26598	T
FAM46C	0.470214	9.01929	5.71206	0.00225991	0.0339112	-1.26749	T
SOGA1	0.277274	10.7001	5.70821	0.00226671	0.0339188	-1.27088	T
DPF3	-0.560192	5.20055	-5.70574	0.00227107	0.0339319	-1.27306	T
MCOLN3	-0.28915	6.12433	-5.70534	0.00227178	0.0339319	-1.27341	T
KAT2B	-0.281165	10.2235	-5.70299	0.00227594	0.0339626	-1.27548	T
SLX4IP	0.445241	7.54278	5.69898	0.00228307	0.0340062	-1.27902	T
NPL	0.675444	5.91811	5.69355	0.00229276	0.0340876	-1.2838	T
LOC107057415	0.309229	6.6934	5.69159	0.00229627	0.0341085	-1.28554	T
TRNAC-GCA	2.27235	1.40242	5.68643	0.00230556	0.0341836	-1.2901	T
ESR1	3.37911	2.18066	5.68047	0.00231632	0.0342707	-1.29537	T
LOC121111657	-0.490387	7.50074	-5.67954	0.002318	0.0342707	-1.29619	T
TEAD3	3.54251	3.91954	5.67953	0.00231803	0.0342707	-1.2962	T
MIR15C	0.77743	3.9166	5.67559	0.00232517	0.034317	-1.29968	T
SYBU	0.388341	6.03928	5.67301	0.00232987	0.0343236	-1.30196	T
LAPTM5	0.265708	12.0143	5.66588	0.00234292	0.0344218	-1.30828	T
CFAP70	1.07919	5.0943	5.66146	0.00235105	0.0344785	-1.3122	T
PAPSS2	0.378364	6.68916	5.65884	0.00235588	0.0344944	-1.31452	T
CXCL13L3	-1.05383	4.64408	-5.65856	0.0023564	0.0344944	-1.31477	T
PXN	-0.276204	10.9657	-5.65118	0.00237009	0.0346102	-1.32132	T
RNF213	0.331921	11.3333	5.65083	0.00237074	0.0346102	-1.32163	T
FAM149B1	-0.27401	9.87469	-5.64398	0.00238353	0.0347026	-1.32772	T
JAKMIP1	-0.454512	5.70718	-5.64168	0.00238784	0.0347026	-1.32976	T
AAMDC	-0.323364	8.0462	-5.64056	0.00238995	0.0347026	-1.33076	T
PHACTR3	0.387644	5.74547	5.6355	0.00239947	0.0348032	-1.33526	T
MAP7D1	0.389419	10.2865	5.63436	0.00240162	0.0348032	-1.33627	T
SNX22	0.726273	6.07901	5.63206	0.00240598	0.0348032	-1.33832	T
TMSB15B	0.308932	7.93366	5.6304	0.00240912	0.0348032	-1.3398	T
INA	-0.679451	6.97279	-5.63005	0.0024098	0.0348032	-1.34011	T
TPD52L1	2.15405	4.04468	5.62668	0.00241619	0.0348644	-1.34311	T
KIAA1462	-0.414103	6.18178	-5.62434	0.00242066	0.0348775	-1.3452	T
CASZ1	-0.753335	6.01588	-5.6158	0.002437	0.0349463	-1.35281	T
LOC107052223	-0.738874	2.7007	-5.61402	0.00244044	0.0349645	-1.35441	T
TRAF3	-0.424492	11.2826	-5.6092	0.00244973	0.0350355	-1.35871	T
TRAPPC2L	-0.313636	8.52384	-5.60298	0.0024618	0.0351459	-1.36426	T
CRTAP	0.660576	5.58622	5.59713	0.00247321	0.0352122	-1.3695	T
LOC771545	0.294204	9.29119	5.59527	0.00247686	0.0352122	-1.37117	T
PRDX4	0.306031	8.51835	5.59458	0.0024782	0.0352122	-1.37178	T
INF2	0.265854	9.34629	5.59455	0.00247826	0.0352122	-1.37181	T
LOC107049033	-0.795273	4.83437	-5.59391	0.00247952	0.0352122	-1.37238	T
EXFABP	-1.16449	3.23125	-5.59004	0.00248713	0.0352892	-1.37584	T
HTATIP2	0.662145	8.4828	5.58209	0.00250285	0.0354812	-1.38297	T
LOC121108033	-0.549339	5.65021	-5.57284	0.00252127	0.035711	-1.39127	T
CAMK4L	0.797354	6.35511	5.57026	0.00252643	0.0357527	-1.39358	T
KIAA1143	0.274488	9.20253	5.56776	0.00253146	0.0357926	-1.39583	T
LOC124417349	-0.55075	6.9957	-5.56208	0.0025429	0.0358621	-1.40093	T
LSM1	0.326655	7.82625	5.56202	0.00254303	0.0358621	-1.40099	T
CXorf21	-0.558378	6.88026	-5.55911	0.00254892	0.0359138	-1.40361	T
LOC769329	-0.323267	10.13	-5.55547	0.0025563	0.0359356	-1.40688	T
TRAK2	-0.343702	9.16061	-5.55506	0.00255714	0.0359356	-1.40725	T
NBEAL2	0.415813	10.3596	5.55293	0.00256147	0.0359576	-1.40917	T
PBXIP1	0.312146	9.66459	5.54746	0.00257265	0.0360377	-1.41409	T
CFD	-1.05125	5.39234	-5.54472	0.00257828	0.0360758	-1.41657	T
SPECC1	0.53035	7.63956	5.54244	0.00258297	0.0360807	-1.41863	T
GATD3A	0.319956	9.64331	5.54237	0.00258311	0.0360807	-1.41869	T
LOC771388	0.419156	6.89562	5.54129	0.00258533	0.0360807	-1.41966	T
WDR90	0.300716	9.27409	5.53754	0.00259307	0.0361301	-1.42304	T
KIF26B	0.888049	2.98147	5.53627	0.0025957	0.0361301	-1.42419	T
LOC121109325	-0.822617	2.52547	-5.53605	0.00259616	0.0361301	-1.42439	T
LOC121110452	-0.550743	7.66014	-5.53417	0.00260004	0.0361301	-1.42608	T
PMLL	0.267394	8.22888	5.53151	0.00260558	0.0361759	-1.42848	T
KRAS	0.341822	7.4304	5.52436	0.00262049	0.0362814	-1.43494	T
LOC121107944	-0.417279	6.47618	-5.52357	0.00262216	0.0362814	-1.43566	T
CHGA	-0.912593	3.7627	-5.52085	0.00262786	0.0363291	-1.43812	T
LOC121108868	-1.00941	4.01397	-5.5172	0.00263553	0.036373	-1.44142	T
MIR1571	-0.982352	2.50085	-5.51443	0.00264137	0.036406	-1.44392	T
ZNF185	-0.386086	7.44073	-5.51394	0.00264242	0.036406	-1.44437	T
THEMIS2	-0.372168	8.16945	-5.50998	0.00265081	0.0364632	-1.44796	T
LOC107055361	0.602801	8.77764	5.50643	0.00265836	0.0365321	-1.45118	T
KIAA1614	0.287394	8.68153	5.49972	0.00267267	0.0366975	-1.45725	T
STARD4	-0.338094	11.2597	-5.49611	0.00268043	0.0367729	-1.46053	T
SENP8	-0.27657	8.07377	-5.48762	0.00269874	0.0369613	-1.46824	T
FAM3D	-0.39156	6.92668	-5.48462	0.00270525	0.0370191	-1.47097	T
LOC121108229	2.25718	10.1829	5.48186	0.00271127	0.0370701	-1.47348	T
LOC427882	-0.595358	4.29095	-5.4785	0.00271859	0.0371388	-1.47653	T
IFT81	0.381581	7.74956	5.47713	0.0027216	0.0371484	-1.47778	T
LOC121111678	-0.91621	4.70759	-5.47157	0.00273378	0.0372833	-1.48284	T
LOC121109899	-0.642625	3.7634	-5.46637	0.00274526	0.0374083	-1.48758	T
VAMP1	0.439115	7.26119	5.46294	0.00275286	0.0374486	-1.49071	T
BHLHE23	0.46409	9.11072	5.45892	0.00276178	0.0375255	-1.49437	T
LOC112530330	2.65286	1.81753	5.4583	0.00276316	0.0375255	-1.49493	T
LOC107053449	-0.920212	4.00874	-5.45496	0.00277062	0.0375759	-1.49799	T
GAB1	-0.303698	7.6458	-5.45456	0.00277152	0.0375759	-1.49835	T
ZNF512B	0.26526	10.6316	5.44493	0.00279313	0.0377338	-1.50714	T
LOC124417086	-0.518021	7.61247	-5.44307	0.00279735	0.0377362	-1.50885	T
PDE7A	0.311472	10.3301	5.44013	0.00280399	0.0377943	-1.51154	T
NOS1AP	-0.37508	6.38354	-5.43582	0.00281378	0.0378205	-1.51548	T
AFG1L	-0.336613	8.71168	-5.43366	0.00281871	0.0378205	-1.51746	T
SPTBN2	0.627046	8.87828	5.4332	0.00281975	0.0378205	-1.51788	T
SLC52A3	-0.292494	9.40187	-5.4331	0.00281998	0.0378205	-1.51797	T
MYO18B	0.555747	9.61127	5.43198	0.00282254	0.0378235	-1.519	T
PDIA2	-0.587578	3.77189	-5.43036	0.00282623	0.0378414	-1.52047	T
LOC121113118	4.03912	2.68577	5.42881	0.00282978	0.0378577	-1.5219	T
KBTBD8	0.390339	8.64838	5.4238	0.00284128	0.0379487	-1.52649	T
RIPK3	-0.471225	8.60712	-5.4211	0.0028475	0.0380004	-1.52896	T
DGCR14	-0.382339	8.51195	-5.41942	0.00285138	0.0380207	-1.5305	T
DRAXIN	-0.269434	7.63022	-5.41611	0.00285904	0.0380915	-1.53354	T
LOC121108659	0.340897	10.4464	5.41079	0.00287143	0.0381935	-1.53843	T
DCAF15	0.282791	9.28489	5.40953	0.00287436	0.0382011	-1.53959	T
FES	0.396088	10.215	5.40707	0.00288011	0.038246	-1.54185	T
ZBTB14	0.27493	7.81041	5.40202	0.00289193	0.0383166	-1.54649	T
LOC107052672	0.765213	7.09269	5.40124	0.00289376	0.0383166	-1.5472	T
PHPT1L	-0.333018	8.23233	-5.39784	0.00290178	0.0383166	-1.55034	T
ZFAND3	-0.271637	9.62042	-5.39773	0.00290203	0.0383166	-1.55044	T
PLEKHG7	3.49279	2.82933	5.39743	0.00290273	0.0383166	-1.55071	T
MCAT	-0.271882	10.8029	-5.39673	0.00290439	0.0383166	-1.55135	T
DHRS7	0.427787	9.67861	5.38859	0.00292369	0.0385398	-1.55885	T
ENTPD4	-0.31402	9.42596	-5.3867	0.0029282	0.0385677	-1.56059	T
ADCK5	-0.463586	6.24762	-5.38356	0.0029357	0.038605	-1.56349	T
S100A14	-0.85168	2.19899	-5.38267	0.00293782	0.038605	-1.56431	T
CD72L2	-0.819411	4.85423	-5.38064	0.00294269	0.0386327	-1.56618	T
BCR	0.28155	10.285	5.37947	0.00294548	0.038638	-1.56726	T
JCHAIN	1.3374	2.49223	5.36988	0.00296863	0.03891	-1.57612	T
LOC112531880	0.298761	10.2746	5.35639	0.00300152	0.0393092	-1.58859	T
F5	0.900871	10.025	5.34646	0.00302601	0.0395979	-1.59779	T
LOC107052902	2.58828	1.8083	5.34374	0.00303277	0.0396542	-1.60031	T
CSRP2	2.35198	2.36739	5.34199	0.00303711	0.0396622	-1.60193	T
LMCD1	0.781614	6.204	5.33836	0.00304615	0.0397007	-1.6053	T
IFT122	-0.300561	9.03705	-5.33434	0.00305621	0.0397734	-1.60903	T
TM4SF19	-0.743887	8.65244	-5.33417	0.00305665	0.0397734	-1.60919	T
CDC7	0.306107	9.38447	5.32963	0.00306804	0.039864	-1.6134	T
C10H15ORF48	-0.375266	9.75266	-5.32943	0.00306855	0.039864	-1.61359	T
TENM1	-0.879197	6.00142	-5.32447	0.00308107	0.0399945	-1.6182	T
ZNF385B	0.820451	6.18749	5.32012	0.0030921	0.0401055	-1.62225	T
TYSND1	0.39467	8.43866	5.3141	0.00310745	0.0402351	-1.62785	T
IQCH	-0.452517	7.26162	-5.31327	0.00310957	0.0402351	-1.62862	T
MAP3K5	-0.264432	10.7306	-5.31024	0.00311734	0.0402995	-1.63145	T
SLC18A1	-0.946948	3.94999	-5.30906	0.00312037	0.0402995	-1.63255	T
SS18L2	-0.26757	7.17128	-5.30841	0.00312202	0.0402995	-1.63315	T
LOC121110679	-0.930965	2.85993	-5.29921	0.00314577	0.0404891	-1.64173	T
LOC121107459	-0.535849	5.23812	-5.29805	0.00314878	0.0404891	-1.64281	T
SLC40A1	0.2959	9.1353	5.29793	0.00314911	0.0404891	-1.64293	T
CTBP2	0.792403	5.74267	5.29567	0.00315496	0.0404891	-1.64503	T
LOC121109080	1.94552	2.17147	5.29402	0.00315926	0.0404891	-1.64657	T
CPPED1	0.365819	7.04024	5.27983	0.00319651	0.0407264	-1.65984	T
SPTBN5	1.64755	3.06027	5.27636	0.00320569	0.0407264	-1.66309	T
LOC112533526	0.975727	5.00654	5.2763	0.00320585	0.0407264	-1.66315	T
SH3GL1	-0.27154	9.47316	-5.27331	0.00321377	0.0407264	-1.66594	T
LOC107054812	0.310529	7.90515	5.27228	0.00321651	0.0407264	-1.66691	T
DUSP10	-0.357569	10.6431	-5.27078	0.0032205	0.0407264	-1.66831	T
MAN2C1	-0.264122	8.3697	-5.2701	0.00322233	0.0407264	-1.66895	T
CBX7	0.277795	10.2174	5.26865	0.00322619	0.0407264	-1.67031	T
LOC124418339	3.13777	1.83513	5.26791	0.00322819	0.0407264	-1.67101	T
HTD2	-0.421029	3.41723	-5.26691	0.00323085	0.0407264	-1.67194	T
GCK	0.889015	6.35196	5.26647	0.00323203	0.0407264	-1.67235	T
DBNDD1	-0.456197	5.50586	-5.2657	0.0032341	0.0407264	-1.67308	T
FAM173A	-0.327447	7.40058	-5.26391	0.00323889	0.0407264	-1.67475	T
KRT9	3.95496	2.75789	5.26348	0.00324004	0.0407264	-1.67516	T
J6367_mgt12	-0.611298	5.56423	-5.2603	0.00324859	0.0407874	-1.67814	T
ADAMTS9	-0.580311	8.30947	-5.25952	0.00325068	0.0407874	-1.67887	T
LOC107052037	1.28017	2.46361	5.25511	0.0032626	0.0408418	-1.68301	T
LOC112532459	2.40393	3.13436	5.2494	0.00327809	0.0409407	-1.68838	T
ANKRD16	-0.447098	6.63488	-5.24534	0.00328917	0.0410473	-1.6922	T
LOC121111456	-0.529232	5.72629	-5.24035	0.00330282	0.0411568	-1.69688	T
EXOC3L	-0.954053	5.67572	-5.24027	0.00330304	0.0411568	-1.69696	T
STN1	-0.394216	7.92011	-5.23829	0.00330848	0.0411643	-1.69882	T
GADL1	0.424976	7.77034	5.2382	0.00330873	0.0411643	-1.69891	T
LGALSL2	-0.497908	5.28656	-5.23623	0.00331417	0.0412002	-1.70077	T
LOC121106757	0.418251	5.10913	5.23408	0.00332009	0.0412421	-1.70279	T
LOC101751615	0.451382	8.08018	5.23135	0.00332763	0.041304	-1.70536	T
LOC107052249	0.526768	5.40479	5.22918	0.00333364	0.0413203	-1.7074	T
LOC112530078	-0.830709	2.91394	-5.22903	0.00333406	0.0413203	-1.70754	T
TMPRSS11F	-0.844864	4.20883	-5.22771	0.00333773	0.0413244	-1.70879	T
RSAD1	0.497447	7.83939	5.22672	0.00334048	0.0413244	-1.70972	T
ZFYVE1	0.266597	8.28966	5.22616	0.00334206	0.0413244	-1.71026	T
PITX2	0.562363	7.0137	5.2212	0.00335589	0.0414293	-1.71493	T
MERTK	0.668269	6.70532	5.22036	0.00335823	0.0414293	-1.71572	T
LOC121110378	-0.382767	7.66587	-5.21478	0.00337389	0.041559	-1.72099	T
LOC121107943	-0.538161	7.72995	-5.20988	0.00338772	0.0416659	-1.72562	T
IFNAR1	0.362175	8.00519	5.20295	0.00340736	0.0418486	-1.73217	T
NDUFAF2	0.325667	7.62928	5.19414	0.00343257	0.0420575	-1.74051	T
LOC124417201	-0.951349	3.87238	-5.18789	0.00345057	0.0421825	-1.74643	T
ABHD11	-0.381017	5.54603	-5.18572	0.00345685	0.0421825	-1.74849	T
LOC107051868	-0.390905	7.17835	-5.18546	0.0034576	0.0421825	-1.74874	T
LOC107053787	1.71424	1.12337	5.18348	0.00346333	0.0422103	-1.75062	T
BTC	-0.491072	4.93084	-5.18141	0.00346934	0.0422327	-1.75258	T
LOC107051453	3.41178	2.37211	5.18105	0.0034704	0.0422327	-1.75292	T
LOC121111415	0.814756	7.04119	5.17431	0.00349007	0.0423965	-1.75932	T
SCD5	-0.441493	7.51998	-5.17374	0.00349173	0.0423965	-1.75986	T
LOC121106754	-0.719467	5.09387	-5.17143	0.0034985	0.0424469	-1.76205	T
AR	0.646792	8.0925	5.1701	0.00350242	0.0424626	-1.76332	T
IL31RA	0.433966	9.12042	5.16849	0.00350715	0.042488	-1.76485	T
ATP11A	-0.447519	11.3369	-5.16477	0.00351811	0.042557	-1.76838	T
ZC3H12D	1.0277	5.2837	5.16256	0.00352466	0.0426044	-1.77049	T
CEP76	-0.263101	8.37261	-5.15781	0.00353875	0.0426755	-1.77501	T
LOC121109913	-0.35161	5.73913	-5.15675	0.00354191	0.0426755	-1.77602	T
LOC100859740	-0.822492	5.30841	-5.15614	0.00354375	0.0426755	-1.77661	T
LOC107053729	1.21077	4.67852	5.15499	0.00354716	0.0426848	-1.7777	T
SLC27A2	0.606427	6.51051	5.15118	0.00355854	0.0426946	-1.78132	T
SPP1	0.436679	7.27114	5.14932	0.00356413	0.0427279	-1.7831	T
PARVG	0.457395	8.82287	5.14269	0.00358409	0.0428846	-1.78942	T
LOC107050168	0.891311	4.86019	5.1422	0.00358557	0.0428846	-1.78989	T
SNX30	0.268238	9.01883	5.14101	0.00358918	0.0428846	-1.79103	T
ERP29	0.293519	8.81049	5.14064	0.0035903	0.0428846	-1.79138	T
SCARB1	0.276461	7.60455	5.13822	0.00359762	0.0429248	-1.79369	T
RHNO1	0.327617	6.04753	5.13777	0.00359898	0.0429248	-1.79412	T
AVPI1	0.439904	5.64863	5.13472	0.00360825	0.0429403	-1.79703	T
MME	-0.422168	11.0968	-5.13132	0.00361862	0.0429907	-1.80028	T
FAM20B	-0.313454	11.2662	-5.13072	0.00362047	0.0429907	-1.80086	T
MAP9	0.368867	7.26635	5.12953	0.00362409	0.0430021	-1.80199	T
CAND2	-0.265195	9.96562	-5.11806	0.00365939	0.0433134	-1.81297	T
SLC13A5	-0.7236	5.03083	-5.11666	0.00366371	0.0433134	-1.8143	T
LOC121107298	-0.621128	2.96771	-5.11666	0.00366373	0.0433134	-1.81431	T
ATP10D	0.344175	8.1045	5.10885	0.00368801	0.0435687	-1.82179	T
ANKRD10	0.374043	8.23958	5.10494	0.00370026	0.0436177	-1.82554	T
AHR1A	-0.705196	6.06154	-5.10161	0.00371071	0.0436772	-1.82873	T
LOC771876	-0.359474	4.4526	-5.09639	0.00372716	0.0437752	-1.83374	T
NAT8	1.18727	4.93355	5.09297	0.00373801	0.0438707	-1.83703	T
DCTN1	0.317684	11.4909	5.09113	0.00374383	0.0438752	-1.8388	T
UBASH3B	0.295967	10.08	5.09019	0.00374683	0.0438786	-1.8397	T
LOC121113147	-0.906294	3.92864	-5.08875	0.00375141	0.0439004	-1.84109	T
SSBP2	1.13794	4.96922	5.0823	0.00377202	0.0440266	-1.84729	T
NEFM	0.512614	5.77772	5.08151	0.00377457	0.0440266	-1.84806	T
LOC107053124	-0.557284	6.87771	-5.07864	0.00378377	0.0440266	-1.85081	T
HSD17B1	1.15773	4.13826	5.07774	0.00378666	0.0440266	-1.85168	T
FHIP1A	0.270771	9.48588	5.07473	0.00379639	0.0440526	-1.85458	T
LOC777039	-0.369251	6.75151	-5.0745	0.00379712	0.0440526	-1.8548	T
LOC112530804	-0.529147	6.40246	-5.07246	0.00380372	0.0440975	-1.85677	T
LAPTM4B	-0.346808	6.51871	-5.0703	0.00381072	0.044137	-1.85885	T
POLR3K	-0.392751	5.99174	-5.06973	0.00381259	0.044137	-1.8594	T
DNAL4	-0.370766	8.88462	-5.06591	0.00382498	0.0442137	-1.86308	T
LOC112531125	-0.452041	7.09741	-5.06252	0.00383606	0.0442137	-1.86635	T
FYN	-0.283725	11.0434	-5.06075	0.00384185	0.0442137	-1.86806	T
LOC112530880	-0.624431	5.55979	-5.06015	0.00384382	0.0442137	-1.86864	T
LOC101750283	0.950986	5.87802	5.05947	0.00384606	0.0442137	-1.8693	T
LOC121107349	1.86273	4.3778	5.05829	0.00384991	0.0442137	-1.87044	T
LOC121109334	-0.780576	5.58154	-5.05777	0.00385164	0.0442137	-1.87094	T
LOC101750621	0.334106	6.83433	5.05623	0.00385668	0.0442355	-1.87242	T
LOC112530884	-0.313774	9.68338	-5.05399	0.00386406	0.0442887	-1.87459	T
C12orf75	-0.534016	9.1735	-5.05185	0.00387115	0.0443186	-1.87666	T
LOC121111459	-0.806968	3.04373	-5.05154	0.00387215	0.0443186	-1.87696	T
CAV1	0.864008	5.3405	5.04575	0.00389137	0.0444819	-1.88256	T
SYNGAP1	-0.308757	11.1975	-5.04317	0.00389994	0.044497	-1.88505	T
GPR157	0.920754	6.97329	5.0417	0.00390486	0.044497	-1.88648	T
CHEK2	0.263268	8.55796	5.0407	0.0039082	0.044497	-1.88745	T
LOC101749284	-0.403071	5.00112	-5.03907	0.00391364	0.044497	-1.88903	T
ZFAND2A	-0.348166	8.50877	-5.03778	0.00391797	0.044497	-1.89028	T
HHLA2	-0.541601	8.55666	-5.03743	0.00391912	0.044497	-1.89061	T
LOC112532538	1.0236	0.5118	5.0362	0.00392324	0.044497	-1.8918	T
DNAAF9	-0.330182	11.7585	-5.03551	0.00392558	0.044497	-1.89248	T
CSGALNACT2	-0.281965	10.2226	-5.03535	0.00392609	0.044497	-1.89262	T
LRRC6	2.70855	1.86844	5.03444	0.00392917	0.044497	-1.89351	T
CD247	0.350185	5.81872	5.03419	0.00393001	0.044497	-1.89375	T
ASL1	-0.364499	4.86697	-5.03406	0.00393043	0.044497	-1.89387	T
GK2	-0.285296	9.88248	-5.03154	0.00393894	0.044497	-1.89632	T
SCLY	0.323132	8.85513	5.03029	0.00394314	0.044497	-1.89753	T
LOC112530794	-1.0927	2.65239	-5.02895	0.00394768	0.044497	-1.89883	T
DACH1	-0.418026	7.07404	-5.0285	0.00394919	0.044497	-1.89926	T
LOC121107289	-0.456751	5.20056	-5.01117	0.00400832	0.0449226	-1.91609	T
LOC112530831	-0.403302	8.64469	-5.00588	0.0040266	0.0450395	-1.92124	T
LRRC18	-1.00369	2.27499	-5.00492	0.00402989	0.0450395	-1.92217	T
FBXL13	-1.00369	2.27499	-5.00492	0.00402989	0.0450395	-1.92217	T
MANBA	0.376224	8.61118	5.00148	0.00404185	0.0451419	-1.92553	T
SLC2A13	-0.310804	10.7248	-4.9998	0.00404769	0.0451746	-1.92716	T
CPQ	-0.295301	6.96516	-4.99865	0.00405168	0.0451746	-1.92828	T
KLHL28	-0.29622	9.04095	-4.99823	0.00405316	0.0451746	-1.92869	T
CATHB1	-0.893659	6.75112	-4.99734	0.00405626	0.0451779	-1.92955	T
HOXA11	-0.478037	4.99034	-4.99596	0.00406109	0.0452007	-1.9309	T
MIR6632	1.41132	3.49177	4.98332	0.00410552	0.0455707	-1.94322	T
BTK	0.308897	9.67301	4.98198	0.00411029	0.0455912	-1.94454	T
CFAP74	0.727827	4.78872	4.98105	0.00411358	0.0455964	-1.94544	T
MPEG1	0.63011	11.7021	4.97879	0.0041216	0.0456227	-1.94765	T
LOC121111646	-1.15227	2.19937	-4.97777	0.00412523	0.0456317	-1.94865	T
LOC124417463	-0.531763	5.10854	-4.97546	0.00413346	0.0456372	-1.9509	T
ARFGEF3	0.569921	10.0838	4.97463	0.00413641	0.0456372	-1.95171	T
LOC112533310	-1.1639	2.8898	-4.9737	0.00413975	0.0456372	-1.95262	T
LOC419112	-0.724644	4.96729	-4.97313	0.0041418	0.0456372	-1.95318	T
YBEY	-0.358822	7.33019	-4.97288	0.00414268	0.0456372	-1.95342	T
ENPP6	1.97203	3.21521	4.97099	0.00414942	0.045645	-1.95527	T
LOC121107424	1.74897	4.47159	4.96062	0.00418678	0.0459437	-1.96541	T
PROSER2	-0.352595	7.64736	-4.96041	0.00418755	0.0459437	-1.96562	T
ENTPD1	0.574207	7.74804	4.95441	0.00420937	0.0460542	-1.97151	T
LOC100858941	-0.992026	4.12925	-4.95396	0.00421101	0.0460542	-1.97195	T
CDC14A	-0.310514	8.12773	-4.95372	0.00421188	0.0460542	-1.97218	T
LOC107049166	-0.929795	2.23805	-4.94703	0.00423635	0.0462441	-1.97874	T
SLC26A1	-0.542506	4.85448	-4.94399	0.00424751	0.0463185	-1.98172	T
LOC107054160	-0.29202	6.24252	-4.94076	0.00425944	0.046357	-1.9849	T
LOC121113273	-0.796894	3.87496	-4.94036	0.00426091	0.046357	-1.98529	T
C21orf58	3.00801	3.18849	4.9403	0.00426112	0.046357	-1.98534	T
LOC112531986	1.02353	4.73975	4.93993	0.00426251	0.046357	-1.98571	T
RRNAD1	0.302256	6.75657	4.93831	0.00426851	0.0463598	-1.9873	T
FERMT1	-0.463668	8.37619	-4.93318	0.00428756	0.0465354	-1.99235	T
OAF	0.313161	6.22676	4.93025	0.00429848	0.0465913	-1.99523	T
HIST2H3D	-0.619995	3.83652	-4.92778	0.00430772	0.0466602	-1.99766	T
AOPEP	0.337307	6.71282	4.92205	0.0043292	0.046789	-2.00329	T
LOC121108590	0.844898	5.07327	4.92132	0.00433195	0.046789	-2.00401	T
PRSS56	2.26904	1.66702	4.92108	0.00433285	0.046789	-2.00424	T
DCST2	-0.631733	5.94312	-4.91838	0.00434306	0.046825	-2.00691	T
ARL6IP4	0.352686	8.6559	4.9183	0.00434337	0.046825	-2.00699	T
NECAB1	-0.288245	4.52954	-4.91545	0.00435414	0.046825	-2.00979	T
LOC124417384	-0.99233	2.11939	-4.91528	0.0043548	0.046825	-2.00997	T
LOC124418131	-0.99233	2.11939	-4.91528	0.0043548	0.046825	-2.00997	T
OSBPL5	0.338951	7.34033	4.91335	0.00436212	0.0468725	-2.01187	T
NR4A2	-0.609661	5.14265	-4.9102	0.00437408	0.0469024	-2.01497	T
DCAF11	0.388636	8.62281	4.90957	0.00437651	0.0469024	-2.0156	T
LOC112531992	-0.425336	4.46037	-4.90723	0.00438541	0.0469666	-2.0179	T
RAB26	-0.407582	4.67467	-4.90606	0.0043899	0.0469717	-2.01905	T
MIPOL1	0.402759	6.74132	4.90483	0.00439461	0.0469717	-2.02027	T
PRICKLE2	0.337372	5.66406	4.90398	0.00439788	0.0469757	-2.02111	T
LOC107055095	-0.793585	3.83093	-4.90248	0.00440361	0.0470058	-2.02259	T
JUP	-0.406676	9.84122	-4.8965	0.00442668	0.0471897	-2.0285	T
PSD	-0.324055	8.6272	-4.89304	0.00444008	0.04725	-2.03192	T
FNIP2	0.363446	7.2981	4.89275	0.00444119	0.04725	-2.03221	T
GLIS3	-0.460612	4.24924	-4.89137	0.00444655	0.04725	-2.03357	T
LOC124417070	-0.675806	1.81121	-4.89126	0.00444696	0.04725	-2.03367	T
LOC112531791	-0.992673	5.60276	-4.888	0.00445964	0.0473204	-2.0369	T
LOC112532884	-0.799402	5.14539	-4.8873	0.00446237	0.0473204	-2.03759	T
LOC101751380	3.44447	3.05308	4.88386	0.00447583	0.0473829	-2.041	T
LOC101748913	0.62512	6.26535	4.88357	0.00447698	0.0473829	-2.04129	T
LOC121108916	-0.565808	5.90953	-4.8834	0.00447763	0.0473829	-2.04146	T
FGFR2	-0.434733	7.3381	-4.88239	0.00448156	0.0473829	-2.04245	T
HIVEP2	-0.41951	10.2733	-4.88205	0.00448292	0.0473829	-2.04279	T
LOC121106891	0.568969	5.96969	4.8802	0.00449017	0.0474285	-2.04462	T
LOC107056277	0.640106	4.65747	4.87778	0.00449969	0.047498	-2.04702	T
CCSER1	0.371603	7.11707	4.86554	0.00454821	0.0477655	-2.05916	T
MYCT1	0.517367	6.88145	4.86548	0.00454843	0.0477655	-2.05922	T
LOC124417480	-0.93055	2.38834	-4.8629	0.00455875	0.0478204	-2.06178	T
AVD	-0.828352	12.2396	-4.86245	0.00456053	0.0478204	-2.06223	T
ADCY6	0.540286	6.36397	4.86189	0.00456278	0.0478204	-2.06279	T
ENPP2	-0.693286	6.54376	-4.85992	0.00457069	0.0478723	-2.06475	T
LOC107052000	0.451662	6.3944	4.856	0.00458645	0.0479441	-2.06864	T
LOC107049457	0.995811	4.78318	4.85399	0.00459454	0.0479666	-2.07064	T
TP53INP2	-0.334409	9.51907	-4.84751	0.00462077	0.0482093	-2.07708	T
MOK	-0.518209	7.08569	-4.84138	0.00464576	0.0483292	-2.08319	T
CEND1	1.57493	6.46527	4.84029	0.00465021	0.0483292	-2.08427	T
HCK	0.713744	6.79297	4.838	0.00465958	0.0483393	-2.08655	T
GALNT11	-0.27919	9.14792	-4.83437	0.00467452	0.0484438	-2.09018	T
LRFN5	0.442553	7.61048	4.83189	0.00468475	0.0485011	-2.09265	T
LOC121106797	-0.764295	2.1553	-4.83039	0.00469091	0.0485338	-2.09414	T
ANKRD39	0.422088	8.17045	4.82062	0.00473153	0.0487978	-2.1039	T
CXCL13L2	-0.992715	5.65786	-4.81825	0.00474143	0.0488688	-2.10626	T
LPAR2	-0.458548	8.98991	-4.81376	0.00476027	0.0489381	-2.11075	T
USP21	0.501178	7.60415	4.81275	0.00476454	0.0489509	-2.11177	T
GRAMD1B	-0.298829	9.38169	-4.808	0.00478457	0.0490319	-2.11652	T
LOC107052278	-0.795137	5.25968	-4.80724	0.00478778	0.0490338	-2.11728	T
RAB11FIP5	0.304778	10.5676	4.80226	0.00480892	0.0491834	-2.12227	T
LOC112533389	1.68987	1.11118	4.80165	0.00481152	0.0491834	-2.12288	T
LOC107050073	3.14677	3.80401	4.7987	0.00482408	0.0492495	-2.12583	T
GRK5	-0.51989	6.30004	-4.7953	0.00483864	0.0493187	-2.12924	T
LOC121108942	-0.29203	8.30615	-4.79371	0.00484548	0.0493187	-2.13084	T
LOC121109547	1.03227	5.12672	4.7923	0.00485152	0.0493318	-2.13225	T
LOC121106457	-0.737	3.97917	-4.79108	0.00485677	0.0493339	-2.13347	T
LOC121110835	2.31811	1.69155	4.78536	0.00488145	0.0494913	-2.13921	T
LOC107052608	2.58033	2.46324	4.78104	0.00490021	0.0496386	-2.14355	T
OGN	1.41145	4.737	4.7806	0.00490213	0.0496386	-2.14399	T
LOC428525	1.00735	0.503676	4.77917	0.00490836	0.0496707	-2.14543	T
LOC112532217	-0.653083	4.77198	-4.77601	0.00492217	0.0497481	-2.14861	T
LRRC46	1.44098	4.50431	4.77138	0.00494243	0.04991	-2.15326	T
LOC124417331	-0.397236	6.01063	-4.77094	0.00494437	0.04991	-2.15371	T
LOC771657	1.23566	2.84702	4.76909	0.0049525	0.0499609	-2.15557	T
ACTN1	-0.246444	12.9112	-7.3473	0.000717093	0.019412	0.0238562	F
LNPK	-0.248847	9.83903	-7.22989	0.0007729	0.0202133	-0.0598878	F
EBF2	-0.238435	8.70644	-7.13208	0.000823341	0.0207259	-0.130611	F
TAPBPL	-0.262546	7.91383	-7.12353	0.000827933	0.0207475	-0.136837	F
NFE2L2	-0.236517	11.7359	-7.09665	0.000842566	0.020893	-0.15645	F
TADA2B	-0.2423	8.24348	-7.09603	0.000842909	0.020893	-0.156905	F
ATP6V1D	-0.25753	11.347	-7.08901	0.000846783	0.0209569	-0.162039	F
PLCL2	0.248858	9.37506	7.03362	0.000878099	0.0211801	-0.202712	F
HOXD8	-0.240966	10.2011	-7.01252	0.000890391	0.0212864	-0.218287	F
KDM4B	-0.246262	9.39841	-6.94994	0.00092805	0.0217051	-0.264718	F
NIT2	-0.254413	9.45887	-6.93986	0.000934289	0.0218194	-0.272231	F
NT5C2	-0.257619	11.0556	-6.9126	0.000951421	0.0220285	-0.292609	F
VGLL4	-0.239667	11.0196	-6.8239	0.00100977	0.0227601	-0.359397	F
LOC772071	0.229626	11.5119	6.78549	0.00103635	0.0229179	-0.38856	F
RNF130	-0.257655	13.4919	-6.78156	0.00103911	0.0229179	-0.391552	F
SLC26A5	-0.232535	11.4458	-6.76524	0.00105069	0.0230251	-0.403996	F
MAFB	0.258716	11.6119	6.67541	0.00111721	0.0237014	-0.472962	F
SLC16A1	0.229745	12.2072	6.59073	0.00118452	0.0241456	-0.538734	F
STX7	-0.257917	9.23589	-6.52313	0.0012417	0.024928	-0.591771	F
FAM110A	-0.251253	9.66252	-6.47105	0.00128799	0.0253534	-0.632966	F
RFXAP	0.248428	10.421	6.45186	0.00130554	0.0256055	-0.648209	F
CMPK1	-0.253507	11.8538	-6.43366	0.00132247	0.0258745	-0.66271	F
TTC28	-0.250052	12.0454	-6.41429	0.00134076	0.0261061	-0.678181	F
CD40	-0.229103	11.3467	-6.39746	0.00135689	0.0262729	-0.691653	F
SUSD6	-0.231269	11.9508	-6.39098	0.00136317	0.0263519	-0.696852	F
NCF4	-0.239229	9.84988	-6.37003	0.00138369	0.0264798	-0.713683	F
WASHC1	-0.215734	9.59797	-6.36213	0.00139152	0.0265408	-0.720041	F
LCLAT1	-0.2509	11.1747	-6.34417	0.00140952	0.0266011	-0.734523	F
SPI1	-0.247534	12.9291	-6.32504	0.001429	0.0267421	-0.749986	F
FLI1	0.238532	10.8581	6.31121	0.00144328	0.026872	-0.761194	F
CYBB	-0.229041	13.3582	-6.29934	0.00145566	0.0269782	-0.770823	F
SC5D	-0.251195	8.72044	-6.28475	0.00147106	0.0270464	-0.782681	F
WTAP	0.258156	11.0513	6.2816	0.00147441	0.0270772	-0.785246	F
WNK1	0.248101	13.1393	6.26467	0.00149257	0.0272558	-0.799045	F
PRNP	-0.259268	11.2079	-6.23416	0.00152596	0.0275994	-0.823993	F
LOC124417777	-0.214701	8.95414	-6.21812	0.00154388	0.0277538	-0.837157	F
CHD4	0.234853	11.6211	6.21244	0.00155028	0.0277785	-0.841823	F
KLHL11	-0.240096	10.4156	-6.21232	0.00155041	0.0277785	-0.84192	F
GJC3	-0.257721	11.5422	-6.18741	0.00157886	0.0280395	-0.862425	F
COL5A2	0.238123	10.1084	6.17672	0.00159125	0.0281359	-0.871246	F
OSTM1	-0.260729	11.1545	-6.16929	0.00159994	0.02821	-0.877388	F
TKTL1	-0.252576	12.7099	-6.15344	0.00161865	0.0283507	-0.890505	F
SPATA5L1	-0.226231	10.6261	-6.15253	0.00161973	0.0283507	-0.891258	F
AP2M1	0.247248	11.7576	6.14669	0.00162669	0.0284205	-0.896095	F
TCN2	0.233399	8.27792	6.13617	0.00163934	0.0285377	-0.904831	F
INTS10	-0.232862	9.07248	-6.13554	0.00164009	0.0285377	-0.905354	F
SH2B3	-0.250338	9.77637	-6.1276	0.00164971	0.0286677	-0.91195	F
TRA2A	0.222673	11.1694	6.12033	0.00165857	0.0287291	-0.917996	F
RNF20	0.258183	11.3355	6.11863	0.00166065	0.0287342	-0.919407	F
CAMK2G	-0.221229	11.6379	-6.10997	0.0016713	0.028826	-0.926625	F
EXOC7	-0.245552	10.1761	-6.09972	0.00168401	0.0289216	-0.93517	F
DBI	-0.229136	10.8787	-6.08442	0.00170319	0.029189	-0.947954	F
CXorf40B	-0.238647	8.03874	-6.07111	0.00172008	0.0292013	-0.959093	F
METTL18	-0.25241	8.55418	-6.06509	0.00172779	0.0292015	-0.96414	F
PIK3CB	-0.250831	10.835	-6.06239	0.00173127	0.0292015	-0.966408	F
TNKS2	-0.235143	10.0618	-6.04104	0.00175899	0.029458	-0.984342	F
LOC121108647	-0.252357	9.24861	-6.03379	0.00176852	0.0295136	-0.990445	F
ATF1	-0.228676	11.6186	-6.03182	0.00177113	0.0295136	-0.992106	F
TMOD1	-0.253517	3.84997	-6.00901	0.00180157	0.0297103	-1.01135	F
LOC107049501	-0.244614	8.02189	-6.00444	0.00180775	0.0297103	-1.01521	F
ZFYVE26	-0.246319	9.38558	-5.96043	0.00186848	0.0303482	-1.05253	F
SCAF8	0.262348	10.3922	5.95765	0.0018724	0.0303814	-1.0549	F
FOXC1	-0.22528	8.72972	-5.93943	0.00189832	0.0306787	-1.07043	F
ORAI1	-0.21076	9.37628	-5.93225	0.00190864	0.0307839	-1.07655	F
TNIP1	-0.215014	12.1939	-5.92622	0.00191736	0.0308704	-1.0817	F
ZNF365	-0.252938	10.1192	-5.90669	0.00194595	0.0310479	-1.09842	F
ATG4B	0.26296	8.31182	5.90448	0.00194921	0.0310662	-1.10031	F
LCP1	-0.238691	13.2281	-5.89969	0.00195632	0.0311263	-1.10442	F
SLC25A47	-0.242058	9.01676	-5.88099	0.00198432	0.0314175	-1.12048	F
AATK	-0.255039	9.60052	-5.87134	0.00199895	0.0314252	-1.12879	F
PINLYP	0.209565	9.70206	5.8625	0.00201248	0.0315457	-1.1364	F
LOC107050992	0.233645	9.29008	5.85972	0.00201675	0.0315821	-1.1388	F
SLC43A3	-0.244717	10.4614	-5.85015	0.00203155	0.0317403	-1.14707	F
CCDC191	-0.225273	7.09931	-5.82868	0.00206521	0.0321446	-1.16564	F
NUP133	0.216758	11.4748	5.82055	0.00207813	0.0322458	-1.17269	F
GABARAPL2	-0.230634	8.17	-5.81248	0.00209105	0.0322989	-1.17969	F
LOC101747443	0.25035	7.13338	5.78484	0.00213601	0.0327204	-1.20373	F
ELAC2	-0.248336	9.73153	-5.73211	0.00222495	0.0336458	-1.24986	F
NAB1	-0.209913	10.0975	-5.73086	0.00222712	0.0336458	-1.25096	F
GMNN	0.262467	8.02538	5.73055	0.00222765	0.0336458	-1.25123	F
DDHD2	0.239219	8.42983	5.72731	0.00223327	0.0336975	-1.25408	F
CYBC1	-0.221645	11.5738	-5.7108	0.00226213	0.0339124	-1.2686	F
KLF7	-0.2588	8.17924	-5.70964	0.00226419	0.0339124	-1.26962	F
KCTD20	0.262659	9.85098	5.70031	0.0022807	0.0340023	-1.27784	F
TEC	-0.209318	8.82871	-5.69495	0.00229026	0.0340819	-1.28257	F
MICALL2	-0.234055	8.86902	-5.68686	0.00230477	0.0341836	-1.28971	F
LTA4H	0.227659	11.9517	5.67849	0.00231991	0.0342707	-1.29712	F
AKR1B1	0.249863	10.5217	5.67391	0.00232824	0.0343236	-1.30117	F
STXBP1	-0.245836	9.72498	-5.67119	0.00233319	0.0343412	-1.30357	F
PHF21A	-0.213358	9.96646	-5.66963	0.00233605	0.034352	-1.30496	F
HNRNPLL	0.230358	9.48794	5.66277	0.00234865	0.0344745	-1.31104	F
TMEM184B	-0.253351	10.2933	-5.65179	0.00236895	0.0346102	-1.32078	F
CSF3R	0.249549	13.7869	5.6477	0.00237658	0.0346641	-1.32441	F
PIAS4	-0.251897	7.93525	-5.64339	0.00238464	0.0347026	-1.32825	F
LRRC8C	-0.208021	9.71089	-5.64284	0.00238567	0.0347026	-1.32873	F
AMACR	-0.247603	8.88319	-5.63144	0.00240716	0.0348032	-1.33888	F
B4GALT1	-0.259886	9.81893	-5.62169	0.00242572	0.0348775	-1.34756	F
TAGLN2	-0.251787	12.5785	-5.62061	0.00242778	0.0348775	-1.34853	F
CALM2	0.225818	13.1032	5.62061	0.00242779	0.0348775	-1.34853	F
GBA2	-0.212038	9.21823	-5.62055	0.0024279	0.0348775	-1.34858	F
IKBKE	-0.246199	11.3307	-5.61606	0.00243651	0.0349463	-1.35258	F
VCL	-0.239051	10.498	-5.60981	0.00244855	0.0350355	-1.35816	F
GALNT1	0.2418	11.4442	5.6041	0.00245962	0.0351458	-1.36326	F
RNF13	-0.201594	11.7332	-5.60057	0.00246649	0.0351818	-1.36642	F
SMPD4	-0.261458	9.00706	-5.5641	0.00253882	0.0358621	-1.39912	F
SNAP29	0.206635	9.26651	5.55685	0.00255351	0.0359356	-1.40565	F
NECAB3	0.209048	8.23284	5.55211	0.00256316	0.0359576	-1.40991	F
PRELID3B	-0.225689	10.8361	-5.54713	0.00257332	0.0360377	-1.41439	F
COMMD7	0.262349	8.42716	5.53424	0.0025999	0.0361301	-1.42602	F
METTL15P1	-0.220147	6.77886	-5.52763	0.00261367	0.0362571	-1.43199	F
ADD3	-0.240502	10.7545	-5.52467	0.00261984	0.0362814	-1.43466	F
MYB	-0.187517	13.9041	-5.51929	0.00263112	0.0363432	-1.43952	F
CADPS	-0.204623	12.0647	-5.50985	0.00265109	0.0364632	-1.44808	F
MGAT5	0.216677	13.0092	5.49127	0.00269086	0.0368846	-1.46493	F
OSBPL7	0.229329	8.64909	5.46406	0.00275036	0.0374462	-1.48968	F
SRSF2	0.190874	12.5781	5.45161	0.00277812	0.0376098	-1.50104	F
HNRNPUL1	0.215727	11.0465	5.45136	0.00277867	0.0376098	-1.50127	F
ECT2	0.204858	9.39369	5.44802	0.00278618	0.0376799	-1.50433	F
VDR	-0.188263	9.03477	-5.44418	0.00279484	0.0377338	-1.50783	F
ABHD1	0.21893	8.69227	5.43652	0.00281219	0.0378205	-1.51484	F
CDC42BPA	0.242336	8.65245	5.4349	0.00281588	0.0378205	-1.51632	F
ACAT2	-0.24071	9.58239	-5.42769	0.00283236	0.0378608	-1.52293	F
IVD	-0.194082	7.32076	-5.41155	0.00286965	0.0381935	-1.53773	F
MTMR6	-0.25291	9.46432	-5.40605	0.00288249	0.0382462	-1.54278	F
EGLN3	-0.223535	9.73498	-5.39714	0.00290343	0.0383166	-1.55098	F
LOC428335	-0.203232	10.9509	-5.38252	0.00293819	0.038605	-1.56445	F
RNF166	-0.254391	10.8811	-5.34151	0.00303829	0.0396622	-1.60237	F
DTWD1	-0.242353	7.85346	-5.33958	0.00304311	0.0396931	-1.60417	F
CYLD	-0.220935	10.453	-5.31375	0.00310834	0.0402351	-1.62818	F
UBE2L3	-0.183169	10.8124	-5.30425	0.00313275	0.0404058	-1.63703	F
NRBP1	-0.23115	10.4431	-5.29462	0.00315769	0.0404891	-1.64601	F
CYBRD1	0.248538	8.60019	5.29458	0.00315782	0.0404891	-1.64606	F
SLC35B2	0.239066	8.82179	5.29436	0.00315837	0.0404891	-1.64625	F
ACADS	-0.223451	9.3853	-5.2843	0.00318471	0.0407264	-1.65566	F
NACA	-0.193332	11.6502	-5.2841	0.00318524	0.0407264	-1.65584	F
POC5	-0.234671	8.42937	-5.28342	0.00318703	0.0407264	-1.65648	F
BRAF	-0.233652	10.9181	-5.28151	0.00319207	0.0407264	-1.65827	F
FANCL	0.232225	9.05538	5.27465	0.00321023	0.0407264	-1.66469	F
LSS	-0.220789	11.7723	-5.2702	0.00322206	0.0407264	-1.66886	F
SERPINB6	0.250422	9.20659	5.26848	0.00322665	0.0407264	-1.67047	F
ITFG2	-0.252915	8.76445	-5.26693	0.00323079	0.0407264	-1.67192	F
SPOP	-0.185569	9.29795	-5.26678	0.0032312	0.0407264	-1.67206	F
CYB5R1	-0.237846	10.2734	-5.26455	0.00323718	0.0407264	-1.67416	F
TIPRL	0.217466	9.64122	5.26321	0.00324078	0.0407264	-1.67541	F
E2F1	0.182802	10.9632	5.25834	0.00325386	0.0407957	-1.67998	F
KLF3	-0.221749	7.82878	-5.25689	0.00325778	0.0408132	-1.68134	F
MDM1	-0.223541	8.87897	-5.2504	0.00327536	0.0409395	-1.68743	F
STAG3	-0.223328	10.7333	-5.25036	0.00327547	0.0409395	-1.68747	F
TFDP3	0.213957	11.7371	5.22341	0.00334972	0.0413875	-1.71285	F
MFSD12	-0.207624	10.212	-5.21855	0.00336329	0.0414601	-1.71743	F
SLC17A9	-0.226389	9.83631	-5.21177	0.00338236	0.0416317	-1.72383	F
SLC39A6	-0.240313	10.3219	-5.20282	0.00340775	0.0418486	-1.7323	F
SUN2	0.222571	11.2263	5.20133	0.003412	0.0418547	-1.73371	F
SNTB1	-0.211493	10.1781	-5.20083	0.00341343	0.0418547	-1.73418	F
ZHX2	-0.241927	8.45075	-5.19128	0.00344079	0.0421262	-1.74322	F
NDEL1	-0.253216	8.49587	-5.187	0.00345312	0.0421825	-1.74727	F
MGST1	-0.24161	12.3311	-5.18517	0.00345844	0.0421825	-1.74901	F
MAP2K5	0.184265	9.57487	5.17739	0.00348106	0.0423306	-1.75639	F
IGBP1	-0.224995	9.65773	-5.16717	0.00351105	0.0425034	-1.76611	F
ZFAND5	-0.189289	9.76374	-5.15996	0.00353238	0.0426486	-1.77297	F
SPATA5	-0.183599	9.07091	-5.15955	0.0035336	0.0426486	-1.77336	F
SLC24A3	-0.250122	10.2937	-5.15343	0.00355182	0.0426882	-1.77918	F
WDR12	-0.242507	10.3245	-5.15313	0.00355273	0.0426882	-1.77947	F
DOCK11	-0.238657	11.9855	-5.1516	0.00355731	0.0426946	-1.78093	F
AvBD7	-0.26075	12.6063	-5.1485	0.0035666	0.0427279	-1.78388	F
TNFRSF9	-0.240919	8.01903	-5.13501	0.00360738	0.0429403	-1.79676	F
OSBPL10	0.191803	8.21854	5.13478	0.00360806	0.0429403	-1.79697	F
SNAPC4	0.223598	8.96075	5.13149	0.00361809	0.0429907	-1.80011	F
GPS2	0.200536	7.94688	5.12685	0.0036323	0.0430586	-1.80455	F
DLG3	-0.242426	8.54797	-5.12624	0.00363418	0.0430586	-1.80514	F
PAPLN	-0.236661	9.32446	-5.10654	0.00369523	0.0436177	-1.824	F
MED24	-0.206015	10.2148	-5.10536	0.00369894	0.0436177	-1.82514	F
ARPC3	-0.205135	11.2497	-5.10359	0.0037045	0.0436358	-1.82684	F
DGAT2	-0.253491	9.78473	-5.09859	0.00372021	0.0437572	-1.83163	F
ASPG	-0.232157	8.81636	-5.0972	0.00372461	0.0437752	-1.83297	F
PIK3C3	0.186273	9.10117	5.09191	0.00374135	0.0438752	-1.83805	F
RSBN1	-0.261668	8.26956	-5.0822	0.00377233	0.0440266	-1.84738	F
SLC29A3	0.205052	7.91209	5.08041	0.0037781	0.0440266	-1.84911	F
VMP1	-0.244879	12.3329	-5.08019	0.00377881	0.0440266	-1.84933	F
SLC2A14	-0.222162	11.6865	-5.07829	0.0037849	0.0440266	-1.85115	F
TCAIM	-0.245555	7.87142	-5.07773	0.00378671	0.0440266	-1.85169	F
SP1	0.261397	11.21	5.07658	0.00379042	0.044038	-1.8528	F
RAB2A	-0.219895	10.8912	-5.06888	0.00381532	0.044137	-1.86022	F
SRD5A3	-0.245723	7.38834	-5.06262	0.00383575	0.0442137	-1.86626	F
ATP6AP2	0.199134	12.9207	5.05905	0.00384743	0.0442137	-1.8697	F
CRIM1	0.216728	10.862	5.05802	0.00385082	0.0442137	-1.8707	F
ATP13A2	0.225953	12.8853	5.05764	0.00385205	0.0442137	-1.87106	F
BNIP3	0.175705	9.85331	5.04558	0.00389193	0.0444819	-1.88273	F
MYL12A	-0.210539	11.3966	-5.04459	0.00389522	0.0444881	-1.88368	F
ESPL1	0.188553	10.4234	5.0311	0.00394041	0.044497	-1.89674	F
RIN2	0.262475	10.8951	5.02919	0.00394686	0.044497	-1.8986	F
MRPS25	-0.225395	8.8623	-5.02917	0.00394695	0.044497	-1.89862	F
LACTB	-0.172643	9.83569	-5.02752	0.00395253	0.044497	-1.90022	F
C4H4ORF32	-0.176774	10.0982	-5.02714	0.00395382	0.044497	-1.90059	F
CCS	0.197893	10.3407	5.02576	0.00395848	0.044499	-1.90192	F
FZD9	-0.225466	7.35757	-5.02546	0.0039595	0.044499	-1.90222	F
CHMP1B	-0.17573	9.74411	-5.02289	0.00396822	0.0445476	-1.90471	F
MAFK	-0.261025	11.5924	-5.02256	0.00396935	0.0445476	-1.90503	F
TSPEAR	-0.221617	8.9571	-5.01614	0.00399127	0.0447626	-1.91127	F
MRPL16	0.232778	9.44191	5.0078	0.00401996	0.0450219	-1.91938	F
CFLAR	-0.248113	7.7357	-4.98909	0.00408519	0.0454375	-1.9376	F
IGSF3	-0.204699	11.059	-4.98387	0.00410359	0.0455707	-1.94269	F
TPMT	-0.233972	8.62047	-4.98329	0.00410562	0.0455707	-1.94325	F
KIF3A	-0.172606	9.79288	-4.97905	0.00412067	0.0456227	-1.94739	F
FNBP1	0.19644	11.3278	4.97567	0.00413271	0.0456372	-1.9507	F
PSMC3IP	0.227223	9.20924	4.97051	0.00415117	0.045645	-1.95574	F
FERMT2	-0.234376	10.583	-4.97031	0.00415186	0.045645	-1.95593	F
SLC4A10	-0.259434	7.65759	-4.96922	0.00415577	0.045657	-1.957	F
ADAM23	0.205803	9.9399	4.9566	0.00420137	0.0460542	-1.96935	F
GNB4	-0.190899	11.4648	-4.95484	0.00420777	0.0460542	-1.97108	F
LRP5	-0.174312	10.175	-4.94773	0.00423377	0.0462441	-1.97805	F
TEAD1	-0.190209	9.83228	-4.94663	0.00423782	0.0462441	-1.97914	F
DGKE	-0.18542	10.4076	-4.93899	0.00426599	0.0463598	-1.98663	F
ATRAID	0.222637	9.63022	4.93146	0.00429396	0.0465736	-1.99404	F
PNRC2	0.244613	11.1731	4.92579	0.00431514	0.0467093	-1.99961	F
COA4	-0.20055	6.93	-4.92076	0.00433409	0.046789	-2.00457	F
STOML1	0.183631	9.59885	4.91647	0.00435027	0.046825	-2.00879	F
AADAT	0.246483	8.10931	4.91132	0.00436985	0.0469024	-2.01387	F
PEPD	0.160858	10.9606	4.9104	0.00437335	0.0469024	-2.01478	F
DOCK8	0.240996	11.0044	4.90509	0.0043936	0.0469717	-2.02001	F
OLFM2	0.167115	8.722	4.89832	0.00441963	0.0471456	-2.02669	F
ATP6V1H	-0.189946	9.99158	-4.89447	0.00443451	0.047242	-2.0305	F
IKZF1	-0.196897	10.2252	-4.88968	0.00445311	0.0472843	-2.03524	F
CAPZB	-0.162366	11.8712	-4.87631	0.00450549	0.0475282	-2.04848	F
LIN7C	-0.227717	9.63318	-4.8747	0.00451184	0.0475642	-2.05007	F
JUND	-0.241401	11.8827	-4.87335	0.00451718	0.0475894	-2.05141	F
SLC25A22	-0.16339	7.78124	-4.86869	0.00453566	0.047753	-2.05604	F
NET1	0.220717	9.03714	4.86587	0.00454691	0.0477655	-2.05884	F
RAPH1	-0.220414	9.52929	-4.86542	0.00454867	0.0477655	-2.05928	F
SMARCC1	0.209012	11.3901	4.8584	0.00457677	0.0478835	-2.06625	F
CDK8	-0.207873	10.8778	-4.85818	0.00457768	0.0478835	-2.06648	F
MRPS14	-0.170923	9.11985	-4.85412	0.004594	0.0479666	-2.07051	F
RPS27	-0.204529	11.1139	-4.84518	0.00463025	0.0482771	-2.0794	F
SENP5	-0.168474	10.7305	-4.84262	0.00464068	0.0483292	-2.08195	F
HNRNPU	0.222041	12.8933	4.84228	0.00464209	0.0483292	-2.08229	F
DOT1L	-0.245701	12.3604	-4.84061	0.00464888	0.0483292	-2.08395	F
TMEM35A	-0.221702	8.5807	-4.83941	0.00465382	0.0483358	-2.08515	F
CDC14B	0.23267	9.78862	4.83787	0.00466014	0.0483393	-2.08669	F
ENTPD5	-0.235644	8.55282	-4.83396	0.00467621	0.0484438	-2.09059	F
LOC416530	0.195128	8.77238	4.82765	0.00470226	0.0486201	-2.09687	F
AKAP13	0.232961	11.3401	4.82617	0.0047084	0.0486257	-2.09835	F
HECA	0.172327	10.4384	4.82607	0.00470882	0.0486257	-2.09845	F
SCIN	-0.240593	11.0521	-4.82321	0.00472071	0.0487173	-2.10131	F
CALM1	-0.218558	14.4799	-4.81622	0.00474995	0.0488846	-2.1083	F
SLC9A3R1	-0.245208	12.9723	-4.81586	0.00475147	0.0488846	-2.10866	F
FNDC3A	-0.209431	11.3022	-4.81572	0.00475204	0.0488846	-2.1088	F
MAT2L2	0.262402	10.2638	4.81089	0.00477235	0.0489692	-2.11362	F
GPD1L	0.183179	12.0847	4.81088	0.00477239	0.0489692	-2.11363	F
TMEM41B	-0.196622	10.5469	-4.80843	0.00478277	0.0490319	-2.11609	F
ITGAD	-0.252298	9.32954	-4.80308	0.00480543	0.0491834	-2.12144	F
AP2A2	0.221729	10.8217	4.79983	0.00481929	0.0492317	-2.1247	F
FBN1	-0.253214	9.91679	-4.79772	0.00482829	0.0492613	-2.12681	F
SLC35A5	-0.234086	8.91888	-4.79417	0.0048435	0.0493187	-2.13038	F
LOC121108973	0.255856	8.00724	4.79356	0.00484612	0.0493187	-2.13099	F
C12orf50	-0.233251	7.50422	-4.79184	0.00485351	0.0493318	-2.13271	F
PRRC2B	0.191777	11.0385	4.78916	0.00486503	0.0493867	-2.1354	F
FAM103A1	-0.240124	8.31383	-4.78763	0.00487163	0.0494227	-2.13693	F
PRDX1	-0.23804	13.7701	-4.77842	0.00491163	0.0496727	-2.14619	F
B3GNT5	0.69269	6.93878	4.76729	0.00496045	0.0500099	-2.15738	F
CTSO	0.213968	6.73045	4.76593	0.00496647	0.0500393	-2.15876	F
CHST7	-0.208865	11.2024	-4.76484	0.00497125	0.0500563	-2.15985	F
NUMA1	0.374729	12.2069	4.76362	0.00497668	0.0500798	-2.16108	F
MELK	0.242745	9.71313	4.76218	0.00498304	0.0500842	-2.16252	F
PRIM2	0.238978	8.76345	4.76212	0.00498332	0.0500842	-2.16259	F
LOC121109527	-0.555694	4.58066	-4.75895	0.00499742	0.0501947	-2.16579	F
LOC121110359	-0.841236	3.90142	-4.75706	0.00500581	0.0502478	-2.16769	F
BICD2	0.217175	10.517	4.75485	0.00501569	0.0503119	-2.16992	F
STAMBP	-0.197742	9.06758	-4.75424	0.00501843	0.0503119	-2.17054	F
TPX2	0.159879	11.6028	4.75125	0.00503179	0.0504146	-2.17355	F
HDAC7	0.199065	10.6636	4.75018	0.0050366	0.0504315	-2.17463	F
AMN	3.12764	2.09632	4.74712	0.00505035	0.0505379	-2.17771	F
LOC107053352	0.938704	5.818	4.74327	0.00506773	0.0506523	-2.1816	F
LOC112533456	-0.782647	6.0977	-4.7432	0.00506805	0.0506523	-2.18167	F
RAB36	1.47099	4.46866	4.74096	0.00507821	0.0507225	-2.18394	F
BCL10	-0.224858	9.46549	-4.73977	0.00508359	0.0507448	-2.18514	F
KLF12	-0.211706	9.3613	-4.73533	0.00510382	0.0509154	-2.18963	F
LUC7L	-0.176319	9.90737	-4.73344	0.00511242	0.0509386	-2.19154	F
NOL9	0.173846	10.8928	4.73344	0.00511245	0.0509386	-2.19155	F
PCASP3	-0.185814	8.6606	-4.73205	0.0051188	0.0509659	-2.19295	F
MRGBP	-0.294409	9.91166	-4.73102	0.00512352	0.0509659	-2.19399	F
ZBTB40	0.397299	6.4013	4.73077	0.00512466	0.0509659	-2.19424	F
LOC124417373	-0.306804	8.71041	-4.7278	0.00513828	0.051052	-2.19725	F
LOC121107966	-0.551911	6.1467	-4.72632	0.0051451	0.051052	-2.19875	F
ECHS1	0.254889	9.13097	4.72627	0.00514532	0.051052	-2.1988	F
MIR1640	-0.668499	1.80756	-4.72613	0.00514595	0.051052	-2.19894	F
RSG1	0.265928	9.45331	4.72488	0.00515174	0.0510781	-2.20021	F
RBFOX2	0.193427	8.58442	4.72401	0.00515576	0.0510866	-2.20109	F
DMRT2	0.403402	8.38103	4.72285	0.0051611	0.0511082	-2.20226	F
RXRA	0.402879	7.88221	4.72153	0.00516719	0.0511238	-2.2036	F
PELI3	-0.21673	9.61947	-4.72114	0.00516901	0.0511238	-2.204	F
PTMS	0.277723	11.1705	4.71761	0.00518539	0.0512545	-2.20758	F
NEK8	0.238457	7.88704	4.71465	0.00519914	0.051359	-2.21058	F
SLC29A1	-0.16498	11.4984	-4.71392	0.00520256	0.0513599	-2.21132	F
TMEM132D	0.301467	9.30907	4.71311	0.00520631	0.0513599	-2.21214	F
LOC121107689	2.95386	3.53694	4.71249	0.00520921	0.0513599	-2.21277	F
ADPRHL	1.46733	3.97409	4.71191	0.00521194	0.0513599	-2.21336	F
CHCHD3	-0.289885	10.6171	-4.7087	0.00522695	0.0514666	-2.21661	F
SMARCC2	0.217876	10.4655	4.70792	0.00523064	0.0514666	-2.21741	F
THAP6	0.168802	10.2685	4.70756	0.00523233	0.0514666	-2.21778	F
AAK1	0.251942	10.3592	4.70681	0.00523582	0.0514697	-2.21853	F
LOC107052840	0.828934	5.65178	4.70519	0.00524346	0.0514815	-2.22018	F
LOC112531487	-0.337082	6.50617	-4.70474	0.00524554	0.0514815	-2.22063	F
LOC121107133	2.79294	1.39647	4.70452	0.00524659	0.0514815	-2.22086	F
KRT8	1.07092	2.76465	4.70167	0.00526006	0.0515405	-2.22376	F
LOC112530310	-0.387875	6.20329	-4.70158	0.00526049	0.0515405	-2.22385	F
ERG	-1.08153	2.76754	-4.70122	0.00526216	0.0515405	-2.22421	F
CYFIP1	-0.184022	10.9517	-4.6998	0.00526888	0.051575	-2.22565	F
LOC124417543	2.7797	2.31501	4.69601	0.00528686	0.0516623	-2.22951	F
RHOB	-0.192033	9.72787	-4.6959	0.00528738	0.0516623	-2.22962	F
IDS	0.48395	6.85678	4.6959	0.00528738	0.0516623	-2.22962	F
PLA2G15	0.282294	7.94384	4.69481	0.00529254	0.0516678	-2.23073	F
CAPN11	-0.185289	11.9971	-4.69443	0.00529435	0.0516678	-2.23111	F
FAM208B	-0.158026	10.1549	-4.68919	0.0053194	0.051881	-2.23645	F
LDB1	0.176149	11.2026	4.68517	0.00533866	0.0520375	-2.24054	F
C12orf10	-0.272678	8.79283	-4.68299	0.00534912	0.052108	-2.24276	F
PISD	-0.240634	9.86053	-4.68182	0.00535476	0.0521267	-2.24395	F
ARL13A	-1.04603	3.79811	-4.68126	0.00535749	0.0521267	-2.24453	F
AAR2	0.19032	10.3033	4.67989	0.0053641	0.0521596	-2.24592	F
ADM	-0.815946	7.81737	-4.67886	0.00536906	0.0521765	-2.24697	F
MAP7D2	-0.639974	6.37411	-4.67514	0.00538709	0.0523201	-2.25076	F
LOC420411	-0.315933	8.18315	-4.67395	0.0053929	0.0523452	-2.25198	F
ACR	-0.930248	4.02851	-4.67279	0.00539854	0.0523681	-2.25317	F
SEC62	-0.246928	9.34024	-4.67158	0.00540444	0.0523681	-2.2544	F
TCF7	-0.621592	3.83732	-4.67128	0.00540588	0.0523681	-2.2547	F
SLC25A37	-0.291499	7.87168	-4.67045	0.00540992	0.0523681	-2.25555	F
GLYR1	0.186229	12.0068	4.67014	0.00541147	0.0523681	-2.25587	F
FMNL1	-0.18378	11.8225	-4.66804	0.0054217	0.0523979	-2.25801	F
ANKRD29	-0.879226	4.37284	-4.66654	0.00542905	0.0523979	-2.25954	F
HIST1H111L	-0.983984	1.49934	-4.66607	0.00543134	0.0523979	-2.26002	F
C11orf87	-0.325184	10.7167	-4.66602	0.00543161	0.0523979	-2.26008	F
RPS6KB1	-0.211092	11.0621	-4.66582	0.0054326	0.0523979	-2.26028	F
RGS3	-0.336901	8.67831	-4.66553	0.00543401	0.0523979	-2.26058	F
SPRYD7	-0.248996	8.43904	-4.66444	0.00543935	0.0524182	-2.26169	F
LOC107051611	-0.706359	3.65999	-4.66336	0.00544467	0.0524382	-2.26279	F
HYI	0.465111	7.37415	4.6618	0.00545235	0.0524809	-2.26439	F
LONRF3	0.181213	11.2685	4.66072	0.00545765	0.0525007	-2.26549	F
KCNN1	-0.724019	5.34164	-4.65799	0.00547116	0.0525993	-2.26829	F
TMEM255A	0.268435	10.6392	4.6571	0.00547554	0.0526101	-2.26919	F
WEE2	-0.906356	1.92649	-4.65356	0.00549311	0.0527378	-2.27282	F
SPATA13	-0.290104	9.20673	-4.65273	0.00549725	0.0527378	-2.27367	F
PNPLA3	0.179973	9.63281	4.65245	0.00549862	0.0527378	-2.27395	F
MED31	-0.277298	9.204	-4.65119	0.00550487	0.0527435	-2.27524	F
LIMD2	0.378188	8.5397	4.65102	0.00550574	0.0527435	-2.27542	F
HOXD3	-0.250468	7.98249	-4.64726	0.00552448	0.0528917	-2.27926	F
LBFABP	-0.927134	2.61186	-4.64402	0.00554074	0.053016	-2.28259	F
UBE2M	-0.290401	8.70902	-4.64335	0.00554407	0.0530164	-2.28327	F
WDR76	0.278094	9.72828	4.64251	0.00554832	0.0530257	-2.28413	F
LOC124417173	0.491723	4.98261	4.64132	0.00555431	0.0530516	-2.28535	F
OMA1	-0.342328	7.77939	-4.63967	0.00556258	0.0530728	-2.28704	F
CENPC	0.344336	9.37494	4.63957	0.00556311	0.0530728	-2.28714	F
ADHFE1	2.27678	1.65255	4.63781	0.00557198	0.0531261	-2.28895	F
PIEZO1	-0.212534	12.8907	-4.63672	0.00557748	0.0531393	-2.29006	F
CMTR1	0.252218	9.41093	4.63589	0.00558167	0.0531393	-2.29091	F
MCAM	0.631957	7.55708	4.63546	0.00558388	0.0531393	-2.29136	F
LIMS2	0.156646	12.1864	4.63441	0.00558921	0.0531393	-2.29244	F
NEIL3	0.32502	7.58693	4.63429	0.00558981	0.0531393	-2.29256	F
IL10RA	-0.360851	5.88016	-4.63237	0.00559954	0.0531751	-2.29453	F
LOC107050083	0.274635	10.6261	4.63225	0.00560015	0.0531751	-2.29465	F
ZFR2	0.180843	9.83158	4.63005	0.00561136	0.0532235	-2.29692	F
NME1	-0.682913	3.85734	-4.62995	0.00561183	0.0532235	-2.29701	F
ORMDL2	-0.261955	8.63044	-4.62918	0.00561575	0.0532294	-2.2978	F
PCOLCE2	-0.866292	4.15172	-4.62777	0.00562295	0.0532664	-2.29925	F
PIK3IP1	-0.306457	10.3502	-4.62619	0.00563103	0.0533117	-2.30088	F
ATF6B	-0.246232	10.1871	-4.62368	0.00564389	0.0534022	-2.30346	F
EFCAB11	-0.757159	2.85135	-4.62006	0.00566249	0.0535316	-2.30718	F
LOC121109653	2.98814	3.7319	4.61968	0.00566442	0.0535316	-2.30757	F
KAT14	0.179591	9.74407	4.61908	0.00566751	0.0535316	-2.30818	F
SDC1	0.64238	6.82353	4.61762	0.00567505	0.0535715	-2.30968	F
CHIC1	0.286641	8.45465	4.61622	0.00568228	0.0535761	-2.31113	F
SLC16A9	-0.359473	7.54895	-4.61576	0.00568464	0.0535761	-2.3116	F
LOC107052158	-0.942801	3.76801	-4.6156	0.00568548	0.0535761	-2.31176	F
GPAT3	-0.216972	10.1171	-4.61452	0.00569107	0.0535975	-2.31287	F
LOC416147	0.185653	10.122	4.61291	0.0056994	0.0536378	-2.31453	F
HIC1	-0.2415	7.16285	-4.61182	0.00570505	0.0536378	-2.31565	F
URB1	-0.210654	8.99229	-4.61177	0.0057053	0.0536378	-2.3157	F
GTF2H2	-0.231368	9.18869	-4.60985	0.0057153	0.053695	-2.31768	F
CGN	0.582641	6.24608	4.60932	0.00571803	0.053695	-2.31822	F
TRIAP1	0.219301	9.17851	4.6074	0.00572805	0.0537579	-2.3202	F
MYH1G	-0.292494	6.71968	-4.60287	0.00575174	0.0539489	-2.32487	F
PTPRJ	-0.15912	10.5478	-4.59996	0.00576702	0.0540593	-2.32787	F
DESI1	-0.178453	10.4634	-4.59935	0.00577021	0.0540593	-2.3285	F
LOC121113484	0.509704	7.14516	4.59797	0.0057775	0.0540706	-2.32993	F
LOC107049991	0.642664	5.75889	4.59785	0.0057781	0.0540706	-2.33004	F
CNTF	-0.29468	6.89391	-4.59508	0.00579273	0.0541761	-2.3329	F
ABCG4	1.47666	2.57761	4.59375	0.00579976	0.0542105	-2.33428	F
LOC121108297	1.71086	2.30205	4.59071	0.00581585	0.0543132	-2.33741	F
KIAA0930	-0.207478	10.6332	-4.58999	0.00581971	0.0543132	-2.33816	F
LYST	0.265225	11.3117	4.58978	0.00582083	0.0543132	-2.33838	F
ARMC7	0.903308	5.05682	4.58798	0.0058304	0.0543627	-2.34024	F
LOC107051250	0.178689	8.99653	4.58752	0.00583286	0.0543627	-2.34072	F
NSUN3	0.425165	7.26183	4.5865	0.00583828	0.0543666	-2.34177	F
LOC101751749	0.398365	8.83918	4.58611	0.00584038	0.0543666	-2.34217	F
ANKDD1A	-0.191854	8.41772	-4.58539	0.00584418	0.0543666	-2.34291	F
TMEM132B	-0.309401	4.81768	-4.58435	0.00584977	0.0543666	-2.34399	F
DMAP1	-0.195832	9.48012	-4.58429	0.0058501	0.0543666	-2.34405	F
TES	0.304311	8.79961	4.58153	0.00586483	0.0544685	-2.3469	F
VWA8	-0.200689	9.83462	-4.58091	0.00586816	0.0544685	-2.34754	F
KIF21B	0.240143	9.81613	4.58035	0.00587118	0.0544685	-2.34812	F
LOC107051858	-0.958355	3.98975	-4.57923	0.00587718	0.0544929	-2.34928	F
LOC107050163	-0.280789	8.94919	-4.57525	0.00589862	0.0546558	-2.3534	F
LOC107052916	-0.768579	4.26311	-4.57448	0.0059028	0.0546558	-2.3542	F
RAB21	-0.191673	11.9048	-4.57409	0.00590489	0.0546558	-2.3546	F
PPM1K	0.219459	8.63627	4.57274	0.00591217	0.054671	-2.35599	F
FUT4	-0.228459	9.50198	-4.57253	0.0059133	0.054671	-2.35621	F
LOC124417893	-0.721657	4.91637	-4.57126	0.00592018	0.0546827	-2.35753	F
SNRNP48	-0.346745	6.83868	-4.57105	0.00592134	0.0546827	-2.35775	F
RNF19B	-0.279692	8.69766	-4.57005	0.00592675	0.0546891	-2.35878	F
ALG14	-0.377204	5.70651	-4.56967	0.00592883	0.0546891	-2.35918	F
SLC10A7	-0.191083	11.6706	-4.56905	0.00593218	0.0546891	-2.35981	F
ZNF746	0.390597	6.95522	4.56789	0.0059385	0.0547161	-2.36102	F
APCDD1	-0.282631	7.2384	-4.56556	0.00595116	0.0547763	-2.36343	F
GPC2	0.356235	6.78676	4.56544	0.00595181	0.0547763	-2.36355	F
CAMK1D	0.310411	8.44184	4.56357	0.00596206	0.0548394	-2.3655	F
CSF2RA	0.406661	8.96553	4.56234	0.00596876	0.0548699	-2.36677	F
FCER1G	-0.391274	8.39502	-4.56076	0.00597743	0.0549055	-2.36841	F
LOC121106674	-0.492823	8.0286	-4.56039	0.00597944	0.0549055	-2.36879	F
RAE1	-0.187082	9.92841	-4.55936	0.00598508	0.0549261	-2.36986	F
PTBP1	0.153209	12.5272	4.55733	0.00599624	0.054983	-2.37196	F
UBQLN1	-0.186522	10.9585	-4.557	0.00599808	0.054983	-2.37231	F
ARL8B	0.164276	11.6257	4.55511	0.00600848	0.0550177	-2.37427	F
YEATS4	-0.191183	10.234	-4.55466	0.00601096	0.0550177	-2.37474	F
PLEKHA3	-0.179952	10.1007	-4.55426	0.00601314	0.0550177	-2.37515	F
ZNF706	-0.194481	12.3485	-4.55384	0.00601549	0.0550177	-2.37559	F
ZFP91	0.201662	10.7147	4.55322	0.00601892	0.0550179	-2.37623	F
CSRP1	-0.203724	9.54597	-4.55188	0.00602631	0.0550544	-2.37762	F
DHRS4	0.259723	8.80877	4.55073	0.00603266	0.0550813	-2.37881	F
PRKAG2	-0.276453	10.1278	-4.54928	0.0060407	0.0550931	-2.38032	F
LOC121110786	-0.733954	4.96472	-4.54927	0.00604078	0.0550931	-2.38033	F
ID1	0.656018	6.60477	4.54585	0.00605979	0.0552354	-2.38389	F
PPP1R1A	-0.194345	9.25654	-4.54439	0.00606788	0.0552779	-2.3854	F
WNK2	-0.337599	8.79673	-4.54282	0.00607667	0.0552937	-2.38703	F
PACRG	1.03483	5.50664	4.54265	0.00607764	0.0552937	-2.38721	F
LOC107054254	-0.865383	3.38377	-4.54203	0.00608107	0.0552937	-2.38785	F
MAOA	0.422935	5.66515	4.54156	0.00608369	0.0552937	-2.38834	F
CUTAL	-0.685774	4.802	-4.54102	0.00608673	0.0552937	-2.3889	F
CCDC169	4.04503	2.28876	4.53842	0.0061013	0.055395	-2.39161	F
TIGD5	0.808488	4.2037	4.53627	0.00611336	0.0554734	-2.39384	F
HSBP1L1	-0.575102	4.74185	-4.53558	0.00611724	0.055474	-2.39456	F
BEND3	-0.166287	9.86853	-4.53467	0.00612238	0.055474	-2.39551	F
PLXNA2	0.439513	7.93274	4.53443	0.00612373	0.055474	-2.39576	F
ST7	-0.18136	8.19659	-4.53033	0.00614687	0.0555938	-2.40003	F
PHYHD1	0.835857	6.68396	4.53033	0.00614687	0.0555938	-2.40003	F
MCTP2	-0.2425	8.49021	-4.52974	0.00615021	0.0555938	-2.40064	F
LOC121106676	3.58752	3.93573	4.52939	0.00615222	0.0555938	-2.40101	F
TRMT9B	-0.644117	4.81441	-4.52636	0.00616939	0.0555938	-2.40416	F
CETP	-0.665522	5.70629	-4.52617	0.00617047	0.0555938	-2.40436	F
LOC107053484	-0.362999	5.79108	-4.5258	0.00617258	0.0555938	-2.40475	F
ARSH	1.01621	4.34046	4.52477	0.00617843	0.0555938	-2.40582	F
LOC124417707	0.595766	4.72734	4.52425	0.00618143	0.0555938	-2.40637	F
CD7	2.36765	2.11629	4.52374	0.00618435	0.0555938	-2.4069	F
SELENOI	-0.252664	10.2374	-4.52367	0.0061847	0.0555938	-2.40696	F
LOC112531339	-0.412698	8.01793	-4.52333	0.00618665	0.0555938	-2.40732	F
TMCO3	0.26422	8.37594	4.52317	0.00618759	0.0555938	-2.40749	F
PRTFDC1	-0.215916	9.66834	-4.52307	0.00618813	0.0555938	-2.40759	F
KDM2B	-0.161222	10.6813	-4.523	0.00618856	0.0555938	-2.40767	F
LOC121108001	-0.488305	4.23511	-4.52066	0.00620194	0.055653	-2.41011	F
DCTD	0.292181	7.76511	4.5202	0.00620453	0.055653	-2.41059	F
ADPGK	-0.188208	10.1469	-4.52004	0.00620548	0.055653	-2.41076	F
ST3GAL3	1.24065	1.15282	4.51879	0.00621261	0.055686	-2.41206	F
PYGL	0.233315	10.6312	4.51725	0.00622142	0.0557342	-2.41366	F
EPDR1	-0.716146	4.2284	-4.5153	0.00623267	0.0557775	-2.4157	F
MCIDAS	-0.918103	3.24999	-4.51502	0.00623426	0.0557775	-2.41599	F
CCDC58	-0.30084	7.19173	-4.51461	0.00623662	0.0557775	-2.41642	F
LOC416197	-0.468802	7.45225	-4.51256	0.00624847	0.0558029	-2.41856	F
LOC121107308	-0.852434	2.34929	-4.51183	0.00625265	0.0558029	-2.41932	F
LOC121110546	-0.852434	2.34929	-4.51183	0.00625265	0.0558029	-2.41932	F
LOC112530405	-0.282777	4.36374	-4.51172	0.00625327	0.0558029	-2.41943	F
LOC100858567	-0.523355	7.40561	-4.50916	0.00626807	0.0559041	-2.42211	F
GJA3	1.19805	4.009	4.50712	0.00627989	0.0559787	-2.42424	F
MTPN	0.177756	13.198	4.50568	0.00628828	0.0560226	-2.42575	F
RECQL5	-0.20456	9.73419	-4.50399	0.00629811	0.0560339	-2.42751	F
XK	-0.404857	4.69555	-4.5038	0.0062992	0.0560339	-2.42771	F
EXD2	-0.268753	8.9144	-4.50367	0.00629995	0.0560339	-2.42784	F
FGD4	0.417739	8.28972	4.50208	0.00630926	0.0560749	-2.42951	F
PCDHGC5	0.558455	5.66917	4.50126	0.006314	0.0560749	-2.43036	F
TBC1D16	0.309962	8.52977	4.5011	0.00631498	0.0560749	-2.43054	F
ZAR1	-0.239501	8.04154	-4.50008	0.0063209	0.0560967	-2.4316	F
G2E3	0.295445	9.70965	4.49883	0.00632824	0.0561117	-2.43291	F
COL21A1	-0.782932	6.00275	-4.49829	0.00633138	0.0561117	-2.43347	F
TMEM184A	0.299138	7.66246	4.49801	0.00633301	0.0561117	-2.43376	F
LOC429682	0.936747	7.06603	4.49607	0.00634443	0.0561716	-2.4358	F
OMG	1.01203	4.67406	4.49515	0.00634984	0.0561716	-2.43676	F
TM4SF1a	-0.890788	4.30488	-4.4947	0.00635245	0.0561716	-2.43723	F
KCNMB1	-0.332818	6.86629	-4.49449	0.00635368	0.0561716	-2.43745	F
CCL17	-0.993741	1.97018	-4.4935	0.00635953	0.0561926	-2.43849	F
ARHGAP33	0.387556	8.61641	4.49105	0.00637395	0.0562562	-2.44105	F
LOC121111234	-0.460089	5.97426	-4.49104	0.00637401	0.0562562	-2.44106	F
ARGLU1	0.205443	11.1369	4.49051	0.00637717	0.0562562	-2.44162	F
PPP1R13B	0.258627	9.28558	4.48919	0.00638495	0.0562941	-2.443	F
LOC422151	-0.206597	11.5427	-4.48795	0.00639229	0.0563083	-2.4443	F
LOC107053805	-0.518673	6.71793	-4.48774	0.00639353	0.0563083	-2.44452	F
ZFP511	-0.208191	7.16942	-4.48068	0.00643553	0.0566382	-2.45192	F
IGSF1	0.366012	7.56324	4.48027	0.00643799	0.0566382	-2.45235	F
ZBTB10	0.242518	10.46	4.4782	0.00645038	0.0566446	-2.45453	F
MFAP2	2.9067	2.38581	4.47795	0.00645188	0.0566446	-2.45479	F
LOC121107367	2.54992	4.43542	4.4777	0.00645336	0.0566446	-2.45505	F
LOC101750102	1.23638	3.08328	4.47757	0.00645416	0.0566446	-2.45519	F
DEUP1	-1.01975	3.00846	-4.47722	0.00645624	0.0566446	-2.45555	F
LOC121111067	0.446013	5.01095	4.47601	0.00646348	0.0566773	-2.45682	F
SNCB	0.525751	5.44838	4.47541	0.0064671	0.0566783	-2.45745	F
HHIPL2	1.09536	4.52818	4.47339	0.00647925	0.056754	-2.45958	F
PPA2	0.253755	10.912	4.46986	0.00650051	0.0568691	-2.46328	F
OST4	-0.28248	10.1443	-4.46955	0.00650235	0.0568691	-2.4636	F
ANKS1A	0.341585	8.47632	4.46946	0.00650295	0.0568691	-2.4637	F
SCRT2	-1.1205	2.67441	-4.46886	0.00650652	0.0568696	-2.46432	F
FAM105A	0.263462	8.09442	4.4637	0.00653784	0.0571124	-2.46975	F
DYNLL2	0.229511	9.407	4.46026	0.0065588	0.0572646	-2.47337	F
DNAJC1	-0.17409	9.66432	-4.45877	0.00656788	0.0572972	-2.47494	F
LOC107053940	1.76351	3.28217	4.45849	0.00656963	0.0572972	-2.47524	F
LOC101747295	-0.428785	4.37637	-4.45747	0.00657586	0.057318	-2.47631	F
AHCY	0.204201	11.4703	4.45694	0.0065791	0.057318	-2.47687	F
PCGF5	0.205964	11.2739	4.45492	0.00659146	0.0573903	-2.47899	F
HEG1	-0.862212	4.1082	-4.45443	0.00659451	0.0573903	-2.47951	F
P2RX2	0.824738	3.35337	4.45329	0.00660151	0.0574204	-2.48071	F
PSAP	0.174366	14.4875	4.4524	0.00660695	0.0574367	-2.48164	F
SXPH	-0.454561	5.57502	-4.45176	0.00661093	0.0574405	-2.48232	F
LOC121107263	1.48487	2.41391	4.44855	0.00663073	0.0575815	-2.4857	F
TGIF2	0.263032	9.79839	4.44771	0.0066359	0.0575955	-2.48658	F
ABCC3	-0.280749	9.58411	-4.44625	0.00664493	0.0576429	-2.48812	F
SLC38A10	0.173071	12.2127	4.44274	0.00666673	0.057801	-2.49182	F
UBN2	0.182466	12.2996	4.44194	0.00667172	0.0578132	-2.49267	F
BMI1	0.234857	9.8783	4.44077	0.00667897	0.057845	-2.4939	F
GNAI3	0.18336	11.8713	4.43736	0.00670026	0.0579983	-2.49749	F
EPHB3	-0.234114	7.77572	-4.43672	0.0067043	0.0580023	-2.49818	F
ETV5	0.178741	9.4577	4.43388	0.00672207	0.0581032	-2.50117	F
FOXP4	-0.179777	10.0314	-4.43371	0.00672317	0.0581032	-2.50135	F
PIGT	-0.177271	10.5659	-4.43146	0.00673729	0.0581897	-2.50372	F
LOC107053937	-0.483618	5.51875	-4.43097	0.00674037	0.0581897	-2.50424	F
CDT1	0.157225	10.6256	4.4298	0.00674774	0.0582223	-2.50548	F
ADAM32L1	4.04826	3.65491	4.42671	0.00676731	0.0583471	-2.50875	F
TNS1	0.298844	9.65082	4.42637	0.00676944	0.0583471	-2.50911	F
ADD2	0.622542	5.58369	4.42529	0.0067763	0.0583615	-2.51025	F
RAB39A	0.551119	5.66571	4.42458	0.00678078	0.0583615	-2.511	F
LOC121107279	-0.77179	2.6208	-4.4244	0.00678193	0.0583615	-2.51119	F
IRF4	-0.657055	6.46005	-4.42332	0.0067888	0.0583895	-2.51233	F
ATL1	0.635087	5.13387	4.42151	0.0068003	0.0584388	-2.51425	F
LEKR1	-0.248119	6.10958	-4.42128	0.00680177	0.0584388	-2.51449	F
CCNK	-0.258483	9.96304	-4.41974	0.00681153	0.0584916	-2.51611	F
MYO19	-0.212244	10.2509	-4.41767	0.0068248	0.0585744	-2.51831	F
LOC121110883	3.99305	3.56681	4.41693	0.0068295	0.0585836	-2.51909	F
ARHGEF39	0.266518	8.65247	4.41536	0.00683954	0.0586331	-2.52075	F
PDE4D	0.425212	6.60086	4.4149	0.00684253	0.0586331	-2.52124	F
LOXL1	-0.512466	3.46255	-4.41329	0.00685284	0.058655	-2.52295	F
MIR1580	3.11812	2.642	4.41254	0.00685767	0.058655	-2.52374	F
RRS1	0.307821	10.7001	4.41214	0.00686021	0.058655	-2.52416	F
SVIP	-0.167442	7.05464	-4.41197	0.0068613	0.058655	-2.52434	F
PPARA	-0.369056	9.95138	-4.41167	0.00686323	0.058655	-2.52466	F
C18orf8	-0.192494	9.28871	-4.40993	0.00687447	0.0587061	-2.52651	F
FANCG	0.254674	8.90585	4.40961	0.00687648	0.0587061	-2.52684	F
DPY19L3	-0.246796	7.00915	-4.40615	0.00689887	0.0587675	-2.53051	F
LOC124418343	-0.593768	6.20261	-4.4061	0.00689916	0.0587675	-2.53056	F
ARHGEF11	0.243489	10.5034	4.40596	0.00690009	0.0587675	-2.53071	F
WDFY3	0.202768	11.8237	4.40549	0.0069031	0.0587675	-2.53121	F
TIFA	-0.738866	5.45411	-4.40478	0.00690771	0.0587675	-2.53196	F
HEXDC	-0.186258	8.13871	-4.40461	0.00690881	0.0587675	-2.53214	F
ATG7	-0.283267	8.4755	-4.40456	0.00690912	0.0587675	-2.53219	F
ALOX15B	-1.13492	3.89098	-4.40244	0.00692294	0.0588308	-2.53445	F
LOC121113271	-0.846497	6.58736	-4.4023	0.00692384	0.0588308	-2.5346	F
PIWIL1	0.597723	7.73236	4.40104	0.00693202	0.0588694	-2.53593	F
DTL	0.235532	8.51641	4.39985	0.00693974	0.0589017	-2.53719	F
SYNJ2	0.827279	5.33501	4.39884	0.00694632	0.0589017	-2.53826	F
LOC124417326	-0.701845	5.56602	-4.39834	0.0069496	0.0589017	-2.53879	F
DMBX1	0.426078	7.22944	4.39768	0.00695392	0.0589017	-2.5395	F
DHX35	-0.222774	9.39319	-4.39759	0.0069545	0.0589017	-2.53959	F
DPYD	0.309241	8.05716	4.39689	0.00695908	0.0589017	-2.54033	F
GATAD1	-0.212494	8.62339	-4.39654	0.00696135	0.0589017	-2.5407	F
LOC107054576	-0.510175	5.34173	-4.39528	0.00696958	0.058936	-2.54204	F
MCM2	0.167092	11.8045	4.39481	0.00697269	0.058936	-2.54254	F
LOC415787	-0.570715	5.90977	-4.3938	0.00697931	0.0589612	-2.54361	F
ZDHHC15	-0.240888	10.4878	-4.39213	0.00699025	0.0590155	-2.54538	F
CD55	1.0122	5.09325	4.39139	0.00699511	0.0590155	-2.54617	F
IQUB	1.55955	4.72212	4.39102	0.00699755	0.0590155	-2.54656	F
ZDHHC12	-0.203143	8.71237	-4.3906	0.00700035	0.0590155	-2.54702	F
ITPRIP	-0.164189	10.5518	-4.38787	0.00701833	0.0590845	-2.54991	F
TFPI	0.619784	5.43876	4.38759	0.00702019	0.0590845	-2.55021	F
HMGB2	0.219447	11.1533	4.38755	0.00702043	0.0590845	-2.55025	F
NDUFS4	-0.23925	9.64653	-4.38714	0.00702316	0.0590845	-2.55069	F
DHRS13	1.34103	4.27151	4.38489	0.00703802	0.0591619	-2.55308	F
PRG4	-0.767567	2.61869	-4.38464	0.00703968	0.0591619	-2.55335	F
LOC121108570	0.198656	7.99004	4.38196	0.00705745	0.0592804	-2.5562	F
C16orf89	2.51798	2.4577	4.38063	0.00706627	0.0593237	-2.55761	F
LRRC61	1.47925	2.96882	4.37833	0.0070816	0.0594214	-2.56006	F
CERS1	-0.247719	6.82241	-4.37736	0.00708806	0.0594448	-2.56109	F
SAPCD2	0.204392	9.65454	4.37658	0.00709333	0.0594581	-2.56193	F
CD200R1A	1.42343	5.96056	4.3754	0.00710118	0.0594931	-2.56318	F
ABCC1	-0.222638	11.8675	-4.37463	0.00710635	0.0595056	-2.564	F
F8A3	0.407635	9.78643	4.37197	0.00712418	0.0595956	-2.56683	F
SPATA1	0.391428	7.20045	4.37193	0.00712447	0.0595956	-2.56688	F
PLK4	0.293029	9.47006	4.36981	0.00713869	0.0596836	-2.56913	F
LOC121107823	-0.597361	3.24718	-4.36684	0.00715876	0.0598205	-2.5723	F
PTCHD3	-0.375359	9.10962	-4.36589	0.00716518	0.0598431	-2.57331	F
AP3S2	0.291943	9.65045	4.36267	0.00718694	0.0599484	-2.57674	F
NUCKS1	0.186648	11.671	4.36249	0.00718821	0.0599484	-2.57694	F
LOC121113189	0.619534	6.50101	4.36229	0.00718953	0.0599484	-2.57715	F
FOXO4	-0.176642	9.38137	-4.36184	0.00719262	0.0599484	-2.57763	F
NASP	0.185128	10.2704	4.35839	0.0072161	0.0601131	-2.58132	F
FAAP100	0.297789	9.13155	4.3576	0.00722143	0.0601265	-2.58215	F
LOC112532947	1.37915	4.42443	4.3563	0.00723031	0.0601694	-2.58354	F
CHADL	0.282872	6.97553	4.35555	0.00723548	0.0601815	-2.58435	F
PCYT1B	-0.368423	6.66286	-4.35482	0.00724044	0.0601917	-2.58512	F
TGFB1	-0.210096	12.2554	-4.35347	0.00724969	0.0602377	-2.58656	F
CTNND1	-0.18552	10.989	-4.34392	0.00731548	0.0607531	-2.59677	F
CREB3L1	0.237312	8.7858	4.34249	0.00732538	0.0607681	-2.5983	F
MYO3B	-0.358664	10.19	-4.34215	0.00732776	0.0607681	-2.59867	F
SNX24	-0.286796	8.5511	-4.34203	0.00732857	0.0607681	-2.59879	F
OGT	0.163077	11.5862	4.34053	0.00733901	0.0607997	-2.6004	F
LOC121108329	-1.13295	2.79325	-4.3404	0.00733991	0.0607997	-2.60054	F
LOC121110721	-0.63886	4.31773	-4.33912	0.0073488	0.0608123	-2.6019	F
CSPG5	0.390832	7.71415	4.3391	0.00734895	0.0608123	-2.60193	F
ACAP3	-0.160512	8.82586	-4.33689	0.00736437	0.0609087	-2.60429	F
IK	0.171983	10.9056	4.33614	0.00736961	0.0609208	-2.6051	F
LOC101747613	2.7371	3.18065	4.33199	0.00739868	0.061065	-2.60955	F
KIF13A	0.22155	9.24764	4.33174	0.0074004	0.061065	-2.60981	F
EIF2B3	-0.245144	8.93791	-4.33109	0.00740494	0.061065	-2.6105	F
LOC121111663	0.767061	5.19189	4.33063	0.00740822	0.061065	-2.611	F
LOC121111428	-0.349913	5.53016	-4.33015	0.0074116	0.061065	-2.61152	F
LOC112529991	-1.00235	2.27433	-4.33012	0.00741177	0.061065	-2.61154	F
LOC100858664	-0.338855	5.21342	-4.32988	0.0074135	0.061065	-2.61181	F
ANKRD22	0.641361	6.49532	4.32925	0.00741793	0.0610704	-2.61248	F
FAM83D	0.233868	9.90127	4.3281	0.00742601	0.0611058	-2.61371	F
LOC121109239	-0.631964	6.46915	-4.32424	0.00745328	0.0612923	-2.61785	F
DENND5A	-0.19291	11.0213	-4.32243	0.00746606	0.0612923	-2.61979	F
VANGL1	-0.215151	9.21103	-4.32186	0.00747013	0.0612923	-2.6204	F
DPP4	-0.242918	9.08704	-4.32154	0.00747238	0.0612923	-2.62074	F
BAP1	0.192538	10.1572	4.3215	0.00747268	0.0612923	-2.62079	F
PPP1R19B	0.278222	11.2994	4.32128	0.00747423	0.0612923	-2.62102	F
LOC121106551	1.25561	2.46709	4.32079	0.0074777	0.0612923	-2.62155	F
DNMT1	0.211841	11.6085	4.32043	0.00748026	0.0612923	-2.62193	F
C18orf32	-0.167286	10.2901	-4.31988	0.00748422	0.0612923	-2.62253	F
LOC121110502	-0.892918	3.02353	-4.31954	0.0074866	0.0612923	-2.62289	F
B3GAT3	-0.203634	9.55365	-4.31893	0.00749097	0.061297	-2.62355	F
LOC771161	-0.513273	5.03903	-4.31829	0.00749547	0.0613028	-2.62423	F
EPHX1	-0.355582	8.04599	-4.31646	0.00750854	0.0613786	-2.6262	F
ATP6AP1L	-1.05113	1.77402	-4.31535	0.00751648	0.0614124	-2.62739	F
TBC1D8	-0.249811	9.5721	-4.3146	0.00752182	0.0614211	-2.62819	F
MYBL1	0.353272	8.91097	4.31414	0.00752514	0.0614211	-2.62869	F
NFKBIB	-0.287711	10.8389	-4.31345	0.00753006	0.0614303	-2.62943	F
RPUSD3	0.205571	8.34901	4.31175	0.00754226	0.0614742	-2.63126	F
SASH1	-0.241635	9.81135	-4.31164	0.00754305	0.0614742	-2.63138	F
LOC124417848	-0.8003	4.47609	-4.31035	0.0075523	0.0614966	-2.63276	F
PTMA	0.252817	12.8164	4.31019	0.00755342	0.0614966	-2.63293	F
LOC107052170	-0.612577	3.6958	-4.30764	0.00757179	0.0616019	-2.63567	F
ROMO1	-0.386082	8.87189	-4.30734	0.00757397	0.0616019	-2.636	F
PTGR2	0.164758	9.1466	4.30607	0.00758316	0.0616456	-2.63736	F
TBCEL	-0.397405	6.92808	-4.30513	0.00758995	0.0616698	-2.63838	F
GDF11	-0.755709	6.4053	-4.30266	0.00760775	0.0617526	-2.64102	F
RAP2B	0.161897	12.0721	4.30266	0.00760778	0.0617526	-2.64103	F
MSC	-0.343434	9.52451	-4.30116	0.00761867	0.061785	-2.64264	F
RGCCL	-0.478669	6.36369	-4.30058	0.00762291	0.061785	-2.64327	F
DDX6	0.219035	10.9715	4.30053	0.00762325	0.061785	-2.64332	F
CHMP1A	0.255463	9.55108	4.29835	0.00763906	0.0618579	-2.64566	F
MIR6597	2.76824	1.89828	4.29797	0.00764186	0.0618579	-2.64607	F
SLCO4A1	-0.161849	11.3747	-4.29772	0.00764372	0.0618579	-2.64635	F
STAT6	0.179753	11.2871	4.29654	0.00765228	0.0618674	-2.64761	F
[truncated: 14,163 more rows]

## Sheet: SeMC+LPS SeMC
Limma resutls for SeMC+LPS/SeMC
Transcript	logFC	AveExpr	t	P.Value	adj.P.Val	B	Diff
IL1B	5.5332	9.95165	61.4143	1.40224e-08	0.000192678	9.48453	T
TGM4	5.3603	5.70871	50.0303	4.02451e-08	0.000192678	8.98281	T
NOS2	2.58618	9.34755	49.9488	4.05841e-08	0.000192678	8.97832	T
LOC395551	3.00858	8.9889	46.8558	5.63719e-08	0.000192678	8.79599	T
PIGR	6.50142	3.41738	46.3491	5.9612e-08	0.000192678	8.76374	T
LOC121111987	1.68199	2.3143	42.8471	8.92617e-08	0.000225776	8.52003	T
LOC107055195	4.53614	5.18777	42.0926	9.77929e-08	0.000225776	8.46232	T
SNX10	2.01657	10.2126	40.4322	1.20252e-07	0.000231384	8.32806	T
IL8L2	3.43035	9.84944	39.8917	1.28857e-07	0.000231384	8.28208	T
LOC124418344	-1.47331	0.736654	-38.3112	1.58587e-07	0.000244863	8.14072	T
LIPG	3.66985	6.99982	37.2107	1.84186e-07	0.000244863	8.0358	T
LECT2	2.53087	14.3398	36.2749	2.09915e-07	0.000244863	7.94208	T
ACTA2	1.69373	12.6574	35.7233	2.2709e-07	0.000244863	7.8848	T
NFKBIZ	1.43368	9.43329	35.6473	2.29586e-07	0.000244863	7.87679	T
IL2RA	3.81666	5.08202	35.4345	2.3675e-07	0.000244863	7.85419	T
SH3RF3	1.94529	7.79576	35.2714	2.42423e-07	0.000244863	7.8367	T
AVD	5.84283	8.90403	34.4778	2.7245e-07	0.000259004	7.74957	T
LYZ	2.26012	12.8142	33.9341	2.95603e-07	0.000265402	7.68785	T
LOC417973	2.24919	7.52296	33.2957	3.25852e-07	0.000277163	7.61318	T
PI3	5.24196	6.12281	31.2363	4.52091e-07	0.000350506	7.35496	T
BIRC2	1.70232	10.0364	31.1181	4.60962e-07	0.000350506	7.33929	T
DTX2	1.34959	9.6488	30.7033	4.93793e-07	0.000350506	7.2835	T
MRGPRH	3.05731	10.9332	30.6425	4.98832e-07	0.000350506	7.27523	T
IL8L1	3.26204	8.9192	29.4594	6.10376e-07	0.000411012	7.10867	T
NTN4L	1.46353	8.02381	28.4605	7.28368e-07	0.000453269	6.95956	T
CFD	4.70005	2.51669	27.9854	7.93949e-07	0.000453269	6.88575	T
CXCL13L2	4.99483	2.66408	27.9774	7.95113e-07	0.000453269	6.88449	T
NFKBIE	1.09253	10.8089	27.8649	8.11686e-07	0.000453269	6.86672	T
LOC112531786	-1.14057	1.35278	-27.7944	8.22285e-07	0.000453269	6.85553	T
BATF3	2.40778	8.0147	27.5895	8.54048e-07	0.000453269	6.82274	T
LOC776507	2.23949	8.8852	27.4737	8.72628e-07	0.000453269	6.80406	T
A4GALT	3.06228	7.17587	27.3233	8.97507e-07	0.000453269	6.7796	T
IL1R2	1.46463	8.14868	26.9489	9.63192e-07	0.000460994	6.71782	T
LOC416169	1.50759	9.61381	26.7624	9.98059e-07	0.000460994	6.68655	T
G0S2	3.37039	8.17678	26.7607	9.98379e-07	0.000460994	6.68627	T
CD274	2.90902	8.8939	26.1907	1.11467e-06	0.000500395	6.58866	T
LOC419276	2.30797	9.77323	25.8571	1.19023e-06	0.000513601	6.53006	T
CHKA	1.15074	10.9403	25.6632	1.23696e-06	0.000513601	6.49547	T
HEPHL1	2.58377	7.8399	25.6532	1.23943e-06	0.000513601	6.49368	T
MYOF	1.58653	11.3036	25.2067	1.3559e-06	0.000547819	6.41251	T
TUBD1	1.1477	10.5007	24.7624	1.48501e-06	0.000574404	6.32963	T
C1QA	-1.03304	10.847	-24.7371	1.49279e-06	0.000574404	6.32485	T
LYG2	1.86642	7.03195	23.8711	1.79107e-06	0.000670603	6.15674	T
ACSL1	1.6848	9.70318	23.6513	1.87774e-06	0.000670603	6.1127	T
PTPN2	1.08776	10.7063	23.6478	1.87918e-06	0.000670603	6.11199	T
MMP23A	2.18232	8.49521	23.5756	1.90878e-06	0.000670603	6.09738	T
GGT2	2.2451	5.93489	23.2163	2.06455e-06	0.000709898	6.02378	T
LOC427029	1.84485	7.94547	23.0641	2.1351e-06	0.000717716	5.99212	T
ENKUR	2.66613	5.80692	22.9442	2.19272e-06	0.000717716	5.96696	T
NFKBIA	1.4673	10.5793	22.8112	2.25877e-06	0.000717716	5.93886	T
S100A12	2.65811	4.90537	22.7391	2.29559e-06	0.000717716	5.92352	T
MMP27	4.131	5.85635	22.6734	2.32976e-06	0.000717716	5.90949	T
WDFY4	1.62979	9.30468	22.628	2.35375e-06	0.000717716	5.89975	T
IL13RA2	6.08521	7.15327	22.4694	2.43978e-06	0.000719662	5.86556	T
KLHL14	1.1521	7.84559	22.4222	2.46612e-06	0.000719662	5.85532	T
IRAK2	1.01972	11.7909	22.3657	2.4981e-06	0.000719662	5.84301	T
CAPN14	1.72423	9.06783	22.2127	2.58719e-06	0.000719662	5.80949	T
K123	3.55362	7.55923	22.1526	2.62321e-06	0.000719662	5.79624	T
NINJ1	1.92983	9.50028	22.1458	2.62732e-06	0.000719662	5.79474	T
TMEM123	1.11538	12.0078	21.9948	2.72073e-06	0.000732828	5.76119	T
TPM1	0.928149	10.9277	21.7576	2.87548e-06	0.000761812	5.70788	T
EHD3	1.0434	12.2195	21.4352	3.10303e-06	0.000808841	5.63414	T
LOC121107144	2.25292	5.84296	21.1531	3.31993e-06	0.000851641	5.56839	T
PRKAR2B	0.892027	10.5677	21.0763	3.38213e-06	0.000854041	5.55027	T
CSMD1	1.98629	9.0263	21.0061	3.44019e-06	0.000855337	5.53364	T
UPP1	1.20322	10.1484	20.9263	3.50758e-06	0.000858879	5.51465	T
SLCO4C1	1.43025	11.8993	20.8229	3.59731e-06	0.000867702	5.4899	T
WBSCR17	2.4503	6.73482	20.5871	3.81232e-06	0.000905433	5.43284	T
C1QB	-1.06841	10.7276	-20.5309	3.86578e-06	0.000905433	5.41912	T
ALDH1A2	1.52199	7.35886	20.3449	4.04932e-06	0.000934872	5.37333	T
CD44	1.09736	10.6829	20.2741	4.1219e-06	0.000938157	5.35576	T
IL4I1	2.26761	5.41594	20.2188	4.17965e-06	0.000938157	5.34198	T
PDE4B	0.876424	9.7248	20.0327	4.3812e-06	0.000959144	5.29525	T
LOC421268	2.92758	3.5942	19.9969	4.42139e-06	0.000959144	5.28617	T
FAM169B	0.889762	8.9923	19.9705	4.4512e-06	0.000959144	5.27949	T
ETS2	0.817117	9.92345	19.8083	4.63996e-06	0.000986663	5.23812	T
GALNT6	0.914569	11.0547	19.7417	4.7203e-06	0.000990712	5.22099	T
VSTM5	2.24567	1.2895	19.6358	4.85134e-06	0.00100516	5.19363	T
LOC101750112	2.75164	7.96144	19.5452	4.96688e-06	0.00100639	5.17007	T
CMBL	5.20535	6.3729	19.5337	4.98181e-06	0.00100639	5.16707	T
CA12	0.954067	8.13878	19.3155	5.27496e-06	0.00105245	5.10969	T
PTGS2	2.78616	6.66804	19.1411	5.52427e-06	0.00108875	5.0632	T
PANK3	0.915478	13.0964	19.0655	5.63653e-06	0.00109749	5.04291	T
CATHB1	3.58008	4.51426	18.7263	6.1755e-06	0.00118492	4.95051	T
SLC7A3	1.66197	11.4584	18.6927	6.23216e-06	0.00118492	4.94124	T
CIITA	1.12185	7.69371	18.5798	6.42716e-06	0.00119405	4.90994	T
PROK2	2.29879	7.35357	18.5498	6.48017e-06	0.00119405	4.90159	T
EXOC3L	3.57546	3.41096	18.5377	6.50185e-06	0.00119405	4.89819	T
AvBD3	1.5429	6.99329	18.3353	6.875e-06	0.00124839	4.84132	T
LOC121109031	1.39463	7.75029	18.2223	7.09438e-06	0.00127391	4.80924	T
TTC19	0.88343	9.61728	17.8459	7.88829e-06	0.00140091	4.70048	T
FBXL21	1.40924	10.5337	17.7955	8.00234e-06	0.00140571	4.68572	T
PSMG2	0.963728	8.64828	17.7359	8.13979e-06	0.00140983	4.66819	T
LOC121109965	-0.889133	6.98727	-17.7101	8.20024e-06	0.00140983	4.66057	T
LOC121107946	0.775204	8.93728	17.6417	8.36293e-06	0.00142267	4.64032	T
ICOSLG	1.74896	8.58116	17.504	8.70245e-06	0.00145867	4.59924	T
SLC23A2	1.19155	9.93225	17.4769	8.77111e-06	0.00145867	4.59111	T
NCF1C	1.13171	10.0046	17.4479	8.84537e-06	0.00145867	4.5824	T
ANXA2	0.735433	12.6195	17.1761	9.57916e-06	0.00156372	4.49981	T
NT5E	0.903228	10.4713	17.0909	9.824e-06	0.00158766	4.47359	T
DENND4A	0.909496	10.2111	17.0159	1.00457e-05	0.00160741	4.45039	T
MLKL	3.82174	5.69354	16.9369	1.02853e-05	0.00162962	4.42584	T
IRF8	-0.670864	13.0143	-16.8574	1.05338e-05	0.00165279	4.40095	T
LOC107053051	1.05841	3.46696	16.7766	1.07936e-05	0.00167726	4.37553	T
INPP1	1.71956	10.0638	16.4758	1.18305e-05	0.00182088	4.27954	T
SH2D4A	0.936347	6.46196	16.4303	1.19973e-05	0.00182914	4.26485	T
PIK3AP1	0.654915	12.1806	16.16	1.30491e-05	0.0019709	4.17651	T
CD83	1.55079	7.72266	16.1131	1.32426e-05	0.00198161	4.161	T
LOC422929	-0.870427	6.57526	-15.982	1.3802e-05	0.00199407	4.11736	T
LOC420486	3.90307	4.77919	15.96	1.38986e-05	0.00199407	4.11	T
EXFABP	2.48234	1.40784	15.9341	1.40134e-05	0.00199407	4.10131	T
PIM3	0.855956	10.3368	15.9145	1.41008e-05	0.00199407	4.09473	T
DEFB4A	1.00872	14.0127	15.9085	1.41275e-05	0.00199407	4.09273	T
LOC121113271	2.68114	4.82354	15.8551	1.43701e-05	0.00199407	4.07474	T
ALOX15B	3.15685	1.74509	15.8204	1.45303e-05	0.00199407	4.06301	T
LOC124417679	1.07342	4.1652	15.8137	1.45614e-05	0.00199407	4.06075	T
LACC1	0.777346	9.16307	15.7804	1.47178e-05	0.00199407	4.04944	T
GCH1	1.56731	8.29438	15.7627	1.48013e-05	0.00199407	4.04345	T
LOC112530003	1.30664	0.819988	15.7617	1.48065e-05	0.00199407	4.04308	T
LOC121109911	1.30664	0.819988	15.7617	1.48065e-05	0.00199407	4.04308	T
ABCC4	0.773946	11.0539	15.7013	1.50965e-05	0.00201632	4.02253	T
LOC121113291	1.96375	1.14854	15.5742	1.57306e-05	0.00208378	3.97889	T
LOC101751111	-0.722152	3.30813	-15.5199	1.60105e-05	0.00209946	3.96016	T
LOC107054090	0.844733	7.12092	15.5012	1.61087e-05	0.00209946	3.95366	T
LOC101749173	1.22162	6.20916	15.4336	1.64688e-05	0.00212922	3.93016	T
LOC121107106	-0.802936	4.48399	-15.378	1.67717e-05	0.00215117	3.91077	T
TM4SF19	1.94773	7.30663	15.3487	1.69344e-05	0.00215494	3.90049	T
ATP11A	0.884457	10.6709	15.3128	1.7136e-05	0.00216355	3.88789	T
NSUN7	-1.31378	1.43939	-15.1608	1.80221e-05	0.00224425	3.83413	T
FKBP5	-0.814841	12.3655	-15.1557	1.80529e-05	0.00224425	3.83231	T
MAP7D2	1.36159	5.37332	14.9648	1.92467e-05	0.0023744	3.76388	T
LOC100858973	0.618456	11.0037	14.8661	1.99007e-05	0.00241337	3.7281	T
SLC2A6	0.760255	9.34352	14.8647	1.99104e-05	0.00241337	3.72758	T
LOC112533186	1.76043	6.88935	14.8499	2.00107e-05	0.00241337	3.7222	T
TLR2A	-0.652474	9.4257	-14.8098	2.02858e-05	0.00242843	3.70756	T
AvBD5	1.16208	10.0399	14.7258	2.08768e-05	0.00245699	3.67675	T
PIK3R5	0.796401	11.5373	14.7237	2.08913e-05	0.00245699	3.67601	T
UNC13D	1.43916	8.6336	14.7113	2.09804e-05	0.00245699	3.67144	T
PLSCR1	0.659159	12.1272	14.6599	2.13544e-05	0.00248279	3.65247	T
LOC124417891	5.53568	3.39783	14.5675	2.20469e-05	0.002545	3.61817	T
NREP	-0.71336	7.98912	-14.52	2.24127e-05	0.00256888	3.60046	T
MMP1	3.36428	4.96785	14.4847	2.26901e-05	0.00258236	3.58723	T
LOC415852	-0.92548	4.6082	-14.4642	2.28524e-05	0.00258264	3.57955	T
LRRC71	-0.685364	7.5235	-14.4025	2.33505e-05	0.00261482	3.55633	T
LOC101752158	2.66013	4.72353	14.3891	2.34607e-05	0.00261482	3.55125	T
TNIP2	0.767161	9.32162	14.3465	2.38141e-05	0.0026242	3.53514	T
LOC121107627	0.63737	10.3669	14.3291	2.39604e-05	0.0026242	3.52853	T
KLF5	0.846053	10.1738	14.3206	2.40321e-05	0.0026242	3.52531	T
SEC61A2	0.720777	10.5434	14.2769	2.44051e-05	0.00264706	3.50869	T
FAM107B	0.794739	11.4541	14.2569	2.45777e-05	0.002648	3.50108	T
CSGALNACT1	0.733892	9.4794	14.2006	2.50731e-05	0.00266407	3.47953	T
LRRC46	-0.846934	5.64827	-14.175	2.53021e-05	0.00266407	3.46971	T
DCSTAMP	-0.934448	4.94121	-14.1727	2.53229e-05	0.00266407	3.46882	T
NRK	-0.62492	12.3695	-14.1657	2.53862e-05	0.00266407	3.46612	T
LOC121109334	1.71671	4.3329	14.1011	2.59775e-05	0.00270431	3.44123	T
LOC121110003	0.951052	4.10401	14.0875	2.61044e-05	0.00270431	3.43596	T
FCMAR	5.7822	3.90108	14.0585	2.63761e-05	0.00271505	3.42476	T
CD1C	-0.708976	9.1726	-14.012	2.682e-05	0.00274328	3.40669	T
C1S	0.909912	9.11898	13.8575	2.83599e-05	0.00287369	3.34619	T
UGT8L	1.04137	6.43239	13.8488	2.84506e-05	0.00287369	3.34272	T
PMEPA1	-0.806469	9.76837	-13.7608	2.93783e-05	0.00294896	3.30789	T
STEAP3	0.676272	8.71311	13.7284	2.97289e-05	0.00296573	3.29501	T
DNASE1L3	-0.887171	6.94414	-13.7001	3.00386e-05	0.00297824	3.28375	T
CD72L1	1.38914	9.67236	13.6456	3.0647e-05	0.00301895	3.26195	T
CCL4	2.18543	8.03634	13.6301	3.08227e-05	0.00301895	3.25573	T
SEMA6C	1.09297	7.73103	13.5087	3.22416e-05	0.003135	3.20675	T
LFNG	-0.539977	11.0894	-13.4959	3.23955e-05	0.003135	3.20156	T
LOC121108850	1.50863	6.1105	13.4253	3.32619e-05	0.00318353	3.1728	T
UGT2A1	1.47729	10.6889	13.4229	3.3291e-05	0.00318353	3.17185	T
LOC121108050	3.66776	2.00055	13.3945	3.36477e-05	0.00318897	3.16022	T
BCO1	-0.665595	6.9815	-13.3702	3.3956e-05	0.00318897	3.15028	T
NXPH2	0.663386	5.99383	13.3628	3.40511e-05	0.00318897	3.14723	T
TMEM119	-0.588157	8.88646	-13.3561	3.41372e-05	0.00318897	3.14447	T
GCNT4	0.807426	11.425	13.2878	3.50277e-05	0.00325335	3.11636	T
LOC121111678	1.7036	3.39768	13.2402	3.56645e-05	0.00329357	3.09668	T
VSIR	-0.884035	10.7817	-13.2243	3.58814e-05	0.00329476	3.09006	T
LOC121107122	-0.948647	5.46666	-13.1905	3.63454e-05	0.00331852	3.07602	T
SHTN1	-0.910538	7.2411	-13.1633	3.6723e-05	0.00333416	3.06472	T
EPB41L3	-0.536546	8.7207	-13.126	3.72506e-05	0.00335344	3.04912	T
J6367_mgt12	0.942798	4.78718	13.0952	3.76932e-05	0.00335344	3.03619	T
LOC107050303	0.598358	6.47935	13.095	3.76956e-05	0.00335344	3.03612	T
SCNN1D	0.748728	8.45626	13.0777	3.79464e-05	0.00335344	3.02887	T
LOC107049468	2.38273	5.75553	13.0713	3.80403e-05	0.00335344	3.02616	T
LOC121113402	2.52165	6.00885	13.0617	3.81803e-05	0.00335344	3.02214	T
FOXJ1	1.21389	4.93084	13.0169	3.88454e-05	0.00338069	3.00323	T
LOC121107882	0.578416	7.32009	13.0126	3.8909e-05	0.00338069	3.00144	T
TENM1	2.96902	4.07731	12.9496	3.98686e-05	0.00344555	2.97474	T
FLRT2	2.06829	7.25694	12.9156	4.03981e-05	0.00346041	2.96028	T
LITAF	0.548788	8.55976	12.9111	4.04688e-05	0.00346041	2.95836	T
LOC112533456	2.1469	4.63293	12.8949	4.07248e-05	0.00346397	2.95144	T
LOC124417141	-0.756225	6.26928	-12.8811	4.0944e-05	0.00346438	2.94556	T
DNASE2B	-0.839423	8.8663	-12.846	4.15082e-05	0.00349382	2.93054	T
GPR27	0.700893	9.69465	12.8008	4.2249e-05	0.00353775	2.91113	T
ENPP2	1.67677	5.35873	12.7476	4.31404e-05	0.00359378	2.88819	T
LOC121109239	1.32034	5.493	12.7096	4.37902e-05	0.00360906	2.87177	T
LOC121110553	1.44481	3.03579	12.7043	4.3882e-05	0.00360906	2.86947	T
BTBD18	-0.890019	6.05994	-12.6979	4.39939e-05	0.00360906	2.86667	T
FRMD4A	2.31847	6.0005	12.6764	4.43693e-05	0.00362148	2.85733	T
VAV2	0.835814	8.12708	12.6021	4.56948e-05	0.00368215	2.82495	T
GSL	0.528025	10.7593	12.5973	4.57817e-05	0.00368215	2.82286	T
BBIP1	-0.772612	6.96705	-12.5965	4.57962e-05	0.00368215	2.82251	T
CHST13	0.929851	12.3309	12.5674	4.63315e-05	0.00370675	2.80973	T
LOC107052062	-0.940315	6.25685	-12.5464	4.67208e-05	0.00370947	2.80052	T
ERG	2.06011	1.19672	12.5286	4.70541e-05	0.00370947	2.79269	T
LOC121108329	2.06011	1.19672	12.5286	4.70541e-05	0.00370947	2.79269	T
RNF130	0.544587	13.0908	12.4898	4.77919e-05	0.00374794	2.77555	T
LOC124416954	1.42748	9.71158	12.4786	4.80059e-05	0.00374794	2.77063	T
SLC9A7	0.599362	10.041	12.4577	4.84107e-05	0.00376137	2.76138	T
LOC107049264	0.72111	9.82805	12.4018	4.95138e-05	0.00382867	2.73655	T
LOC107053373	1.9325	4.21472	12.3508	5.05457e-05	0.00388985	2.7138	T
GVINP1	-0.799114	8.18332	-12.2882	5.1847e-05	0.00397108	2.68575	T
TNFAIP3	0.727369	10.6439	12.2149	5.34218e-05	0.00407241	2.6527	T
SRRL	0.923377	4.82892	12.1983	5.37862e-05	0.00408094	2.64519	T
LAMP5	1.00381	9.54575	12.1519	5.48223e-05	0.00413229	2.6241	T
NFKB1	0.542771	10.7126	12.1374	5.51512e-05	0.00413229	2.61749	T
TRAF7	0.772075	10.5515	12.1181	5.55919e-05	0.00413229	2.60869	T
LOC100858505	-0.493102	8.51093	-12.1129	5.57107e-05	0.00413229	2.60633	T
SOCS3	0.668507	9.59933	12.1116	5.57415e-05	0.00413229	2.60572	T
COL27A1	-0.720887	6.27991	-12.0934	5.61601e-05	0.00414431	2.59744	T
LOC101751866	1.06995	7.11063	12.0701	5.67054e-05	0.00416409	2.58675	T
LOC121107894	1.22897	4.96578	12.06	5.69435e-05	0.00416409	2.58212	T
TREM2	-0.963293	7.69461	-11.957	5.94371e-05	0.00431673	2.53467	T
CCNDBP1	0.562832	10.6389	11.9519	5.9565e-05	0.00431673	2.53229	T
CETP	1.30785	4.7196	11.9399	5.98642e-05	0.00431904	2.52674	T
LOC121107141	1.4022	10.3892	11.9171	6.04369e-05	0.00433683	2.51619	T
SLC11A1	-0.463791	12.789	-11.9088	6.06474e-05	0.00433683	2.51233	T
CDH23	-0.899902	8.3691	-11.8455	6.2285e-05	0.00443431	2.4828	T
LOC107050103	0.814175	11.4774	11.8071	6.33015e-05	0.00446877	2.46484	T
MXRA8	-0.586628	7.82084	-11.8064	6.3322e-05	0.00446877	2.46448	T
TULP1	-0.963076	6.24957	-11.7262	6.5512e-05	0.00460272	2.42675	T
LOC769617	0.67284	9.93145	11.7134	6.58691e-05	0.00460272	2.42071	T
LOC107056253	1.2001	5.6206	11.6996	6.62599e-05	0.00460272	2.41415	T
AKR1A1	-0.44976	1.69819	-11.6953	6.63792e-05	0.00460272	2.41215	T
TRAF2	1.22752	10.6029	11.6765	6.69142e-05	0.00460272	2.40323	T
CYP3A5	0.545394	12.4694	11.676	6.6929e-05	0.00460272	2.40299	T
LOC124417326	1.34592	4.54214	11.6528	6.75982e-05	0.00460296	2.39193	T
DNAJC5	0.78476	9.33556	11.6515	6.76356e-05	0.00460296	2.39132	T
LOC101748714	-0.68776	4.75016	-11.6462	6.7787e-05	0.00460296	2.38884	T
UNC13B	0.764432	7.55141	11.6063	6.89591e-05	0.00466297	2.36978	T
OAT	0.531762	10.9403	11.5646	7.02064e-05	0.00471952	2.34986	T
SBF2	0.548274	9.69264	11.5589	7.03796e-05	0.00471952	2.34711	T
LOC107054808	0.548082	7.97664	11.5304	7.1252e-05	0.00475828	2.33341	T
LOC121109966	-0.458379	7.48666	-11.4478	7.38506e-05	0.00490039	2.29355	T
LOC101751026	1.95567	5.06251	11.4436	7.39864e-05	0.00490039	2.29151	T
HMGCR	0.561437	11.942	11.4288	7.44653e-05	0.00491197	2.28432	T
SUCNR1	-0.476996	11.1565	-11.3812	7.60273e-05	0.00496861	2.2612	T
LOC121106510	1.48949	5.68446	11.3761	7.61984e-05	0.00496861	2.2587	T
LBH	1.78046	6.14602	11.3747	7.62462e-05	0.00496861	2.258	T
MN1	-0.502341	10.1692	-11.3546	7.6919e-05	0.00499232	2.24821	T
C26H6ORF222	-0.707292	5.70058	-11.3194	7.81189e-05	0.0050488	2.23096	T
CH25H	1.02736	6.68251	11.3108	7.8414e-05	0.0050488	2.22676	T
CD63	1.01809	12.3638	11.2786	7.95372e-05	0.0051008	2.2109	T
COL21A1	2.00809	4.60724	11.248	8.06167e-05	0.00514897	2.19587	T
LPCAT2	0.612849	9.69355	11.2394	8.09256e-05	0.00514897	2.1916	T
HRAS	0.674485	10.4444	11.2022	8.22725e-05	0.00521414	2.17319	T
CPNE8	0.557517	7.593	11.1834	8.2961e-05	0.00523724	2.16389	T
LOC429518	-0.577488	11.0001	-11.1723	8.33738e-05	0.00524282	2.15835	T
ADORA2B	0.693452	12.5535	11.1375	8.46766e-05	0.0053041	2.14104	T
LOC121109873	-0.877099	3.00944	-11.117	8.54569e-05	0.00533231	2.1308	T
DMBT1	-0.448736	12.2825	-11.0932	8.63735e-05	0.00535899	2.11888	T
GPER1	-0.563446	8.37098	-11.0887	8.65476e-05	0.00535899	2.11663	T
MEF2C	-0.796865	8.89415	-11.072	8.7198e-05	0.00537866	2.10827	T
CKB	0.528061	11.9383	11.0625	8.75694e-05	0.00538102	2.10352	T
IRF4	1.44764	5.4077	11.0216	8.91982e-05	0.00545756	2.08292	T
OASL	-0.6488	8.7894	-11.0118	8.95906e-05	0.00545756	2.07802	T
RNF144A	0.572528	8.83921	11.0033	8.99374e-05	0.00545756	2.0737	T
C12orf75	0.98557	8.4137	10.9977	9.01657e-05	0.00545756	2.07087	T
ADIPOQ	1.66279	5.41983	10.952	9.2051e-05	0.00555088	2.04773	T
LOC121113288	1.87837	3.22819	10.8994	9.4277e-05	0.00566398	2.021	T
SLC30A3	-0.637771	7.4451	-10.8724	9.54473e-05	0.00571305	2.00719	T
PLEKHG7	-1.03435	5.09291	-10.863	9.58582e-05	0.00571648	2.00238	T
LOC429682	-0.657042	7.86292	-10.8465	9.6582e-05	0.00573847	1.99396	T
TPD52L2	0.555749	10.5667	10.8274	9.74322e-05	0.00575726	1.98415	T
COQ6	0.4834	8.11669	10.8234	9.76109e-05	0.00575726	1.9821	T
MED30	0.506361	7.28348	10.8098	9.82188e-05	0.00577205	1.97515	T
MEF2D	-0.585431	11.4412	-10.7896	9.91356e-05	0.00580482	1.96474	T
MECR	-0.495124	9.83328	-10.7797	9.95878e-05	0.00581025	1.95964	T
LOC107052519	-0.825268	9.11561	-10.7537	0.000100792	0.00585933	1.94618	T
FERMT1	0.724418	7.78215	10.7369	0.000101573	0.00588228	1.93753	T
ACTN1	0.415918	12.58	10.7296	0.000101917	0.00588228	1.93374	T
FGFR3	-0.570908	9.93355	-10.722	0.000102278	0.00588228	1.92977	T
LOC121107846	0.815142	4.69151	10.7056	0.000103056	0.0058948	1.92128	T
RUFY4	-0.465529	9.53996	-10.7021	0.000103226	0.0058948	1.91944	T
LOC124417667	2.90987	1.6216	10.6838	0.000104104	0.005924	1.90995	T
LOC107053805	0.969385	5.9739	10.6701	0.000104768	0.0059409	1.90281	T
PATL2	-0.439462	9.4495	-10.6625	0.000105138	0.00594105	1.89886	T
LOC112533381	1.22072	3.93966	10.649	0.0001058	0.00595763	1.89182	T
LOC107056270	-0.547841	8.81357	-10.6182	0.000107331	0.00602281	1.87571	T
ZSWIM7	1.00796	9.90817	10.6009	0.000108204	0.00605081	1.86662	T
TF	-0.45536	12.1666	-10.5854	0.000108987	0.00607356	1.85853	T
DNAAF9	0.530798	11.328	10.5651	0.000110032	0.00611077	1.84782	T
LOC107053298	-0.722861	10.1998	-10.5534	0.000110636	0.00612326	1.84168	T
LOC121107307	2.57413	3.51384	10.5447	0.000111089	0.00612734	1.83709	T
LCP1	0.469541	12.8739	10.5337	0.000111667	0.00613825	1.83127	T
PECAM1	-0.6246	10.9784	-10.4982	0.00011355	0.00620365	1.81249	T
CCL5	6.72932	4.85746	10.4888	0.000114051	0.00620365	1.80756	T
HOXD10	0.852521	8.79376	10.4836	0.000114335	0.00620365	1.80476	T
CCR2	-0.554504	8.5453	-10.4825	0.000114392	0.00620365	1.8042	T
KCNAB1	1.95182	5.52147	10.4559	0.000115842	0.00624635	1.79005	T
HMGB1	-0.513036	13.6411	-10.4539	0.000115952	0.00624635	1.78898	T
GDF11	2.08446	4.98521	10.4228	0.000117672	0.00628993	1.77244	T
SLC6A4	-0.522734	10.5983	-10.4223	0.000117699	0.00628993	1.77218	T
ADRA1B	0.72561	7.57841	10.4176	0.000117966	0.00628993	1.76964	T
SLC2A13	0.522762	10.3081	10.4061	0.000118613	0.00628993	1.76349	T
PPARA	0.601279	9.46621	10.4044	0.000118707	0.00628993	1.7626	T
MOK	0.857287	6.39794	10.3664	0.000120878	0.00638401	1.74223	T
OSTM1	0.455688	10.7963	10.3555	0.000121506	0.00639628	1.73641	T
GREB1L	1.05128	5.99985	10.3474	0.000121977	0.00640023	1.73206	T
FAM20B	0.548836	10.835	10.3399	0.000122415	0.00640241	1.72803	T
C9ORF58	-0.663857	10.6026	-10.3225	0.000123437	0.00642347	1.71867	T
DUSP16	0.835976	8.52414	10.3196	0.000123612	0.00642347	1.71708	T
PAK3	0.480475	11.1909	10.3018	0.000124674	0.00644292	1.70747	T
FBXL13	1.60648	0.969907	10.2995	0.000124809	0.00644292	1.70624	T
CALM1	0.481504	14.1298	10.2849	0.000125689	0.00644292	1.69835	T
ZYX	0.494807	11.019	10.2829	0.000125806	0.00644292	1.69729	T
ITGB5	-0.440266	10.4644	-10.2795	0.000126015	0.00644292	1.69543	T
CREB1	0.473567	10.9785	10.2715	0.000126501	0.00644292	1.6911	T
UGP2	0.544392	12.1357	10.2669	0.000126777	0.00644292	1.68864	T
MGAT3	-0.613155	10.9292	-10.2331	0.000128866	0.00650872	1.67026	T
CTSH	-0.43911	12.491	-10.2278	0.000129196	0.00650872	1.66738	T
FKBP1A	-0.411883	12.2215	-10.2264	0.00012928	0.00650872	1.66664	T
LOC107052490	-0.454476	8.69211	-10.2053	0.000130605	0.00653554	1.65517	T
GRK5	0.989105	5.54554	10.2051	0.000130622	0.00653554	1.65502	T
KCNK13	-0.592079	6.79357	-10.1865	0.000131801	0.00655968	1.64491	T
GFRA1	0.498192	9.48779	10.1808	0.000132165	0.00655968	1.6418	T
IER5L	-0.530718	10.6348	-10.1784	0.000132322	0.00655968	1.64047	T
LOC107049488	2.46489	1.39911	10.1639	0.000133255	0.00657938	1.63255	T
DACH1	0.591686	6.56919	10.1579	0.000133645	0.00657938	1.62926	T
PELI2	0.625424	8.26896	10.1534	0.000133941	0.00657938	1.62677	T
CCDC85C	0.974187	5.73425	10.1457	0.000134443	0.00658402	1.62256	T
CARHSP1	0.952584	9.12343	10.1129	0.000136609	0.00661529	1.60455	T
MYO1F	-0.478274	10.4912	-10.1104	0.000136773	0.00661529	1.60321	T
DUSP10	0.614268	10.1572	10.1038	0.000137218	0.00661529	1.59954	T
PDLIM5	0.452864	11.0433	10.0991	0.000137536	0.00661529	1.59694	T
NDRG1	-0.730833	7.25468	-10.084	0.000138556	0.00661529	1.58862	T
BHLHE40	0.439737	11.5265	10.0828	0.000138631	0.00661529	1.588	T
LOC121108868	1.88604	2.56625	10.0685	0.00013961	0.00661529	1.58008	T
INPP5D	-0.461842	11.602	-10.0662	0.000139769	0.00661529	1.57879	T
BTBD11	0.486116	10.8567	10.0637	0.000139941	0.00661529	1.57741	T
SESN3	0.696856	9.40616	10.0626	0.000140011	0.00661529	1.57685	T
VGLL4	0.399429	10.7001	10.0626	0.000140014	0.00661529	1.57682	T
RAB7B	0.680882	6.08264	10.0575	0.000140366	0.00661529	1.57399	T
UNC93B1	-0.547108	9.64487	-10.0569	0.000140403	0.00661529	1.5737	T
AvBD4	0.623892	11.7584	10.047	0.000141086	0.00661911	1.56822	T
LOC121109170	1.06574	6.41005	10.0439	0.000141303	0.00661911	1.56649	T
LOC107056139	4.71371	2.90351	10.0038	0.000144119	0.00673153	1.54424	T
NUMB	0.500517	10.8053	9.99223	0.000144947	0.00675068	1.53779	T
BIK	0.643616	6.98901	9.96283	0.000147068	0.00682979	1.5214	T
NELFCD	-0.406926	12.2511	-9.93916	0.000148803	0.00689057	1.50817	T
POLA1	-0.450993	11.0879	-9.92376	0.000149945	0.00692361	1.49955	T
ECM1	0.854194	11.187	9.91798	0.000150377	0.00692375	1.49631	T
HMGN2P46	-0.410686	8.7734	-9.87601	0.000153553	0.00704736	1.47272	T
LOC121111272	0.575431	3.5072	9.87105	0.000153933	0.00704736	1.46993	T
LOC124417349	1.01372	6.21346	9.82416	0.000157587	0.00718578	1.44345	T
TSKU	0.786117	8.56935	9.81591	0.00015824	0.00718578	1.43878	T
FAM184B	-0.664199	6.59669	-9.81527	0.000158291	0.00718578	1.43842	T
FOXK1	0.715214	10.4667	9.80661	0.000158981	0.00719358	1.4335	T
INHBB	1.59053	5.52175	9.79994	0.000159514	0.00719358	1.42972	T
LOC121108916	0.982413	5.13542	9.78771	0.000160498	0.00719358	1.42278	T
PPP1R7	0.544266	10.6485	9.78431	0.000160773	0.00719358	1.42085	T
NRCAM	-0.511192	7.33358	-9.77774	0.000161306	0.00719358	1.41711	T
LOC121106856	1.33799	3.70576	9.77181	0.000161788	0.00719358	1.41374	T
RSRP1	0.43949	9.83456	9.76571	0.000162286	0.00719358	1.41027	T
BTG2	1.47315	8.87805	9.76483	0.000162358	0.00719358	1.40976	T
CYBB	0.515107	12.9861	9.76348	0.000162469	0.00719358	1.40899	T
C11orf87	0.55165	10.2783	9.74174	0.000164261	0.0072476	1.3966	T
CD7	-0.877756	3.73899	-9.73783	0.000164586	0.0072476	1.39437	T
RNASE6	-0.679486	9.78818	-9.7259	0.000165582	0.00726425	1.38755	T
PDE1B	-0.485124	8.34598	-9.72255	0.000165863	0.00726425	1.38564	T
ARSH	-0.738494	5.21781	-9.70945	0.000166967	0.00729284	1.37814	T
OMG	-0.717029	5.53859	-9.68637	0.000168934	0.00735886	1.36491	T
HTRA3	0.757784	6.02838	9.67824	0.000169632	0.00736942	1.36024	T
LOC121107117	1.55625	4.03144	9.66151	0.000171082	0.00741249	1.35062	T
ZC3H7B	-0.437821	11.876	-9.65131	0.000171974	0.00743119	1.34474	T
THRB	0.89952	9.92633	9.61837	0.000174889	0.0075349	1.32574	T
DGCR14	0.541964	8.04979	9.61173	0.000175483	0.0075349	1.3219	T
AKR1B10	-0.493536	10.059	-9.60757	0.000175858	0.0075349	1.31949	T
STMN1	-0.435637	9.81733	-9.59461	0.000177028	0.0075349	1.31199	T
ATP6V1D	0.409332	11.0135	9.5933	0.000177147	0.0075349	1.31123	T
ZC3H12A	0.64511	12.8807	9.59303	0.000177171	0.0075349	1.31108	T
KDELC2	-0.557413	10.112	-9.58739	0.000177684	0.00753688	1.30781	T
LOC107053571	1.90977	4.9442	9.57602	0.000178723	0.00755188	1.30121	T
LOC121107985	1.33837	2.67886	9.57097	0.000179187	0.00755188	1.29828	T
OTUD7A	0.4876	8.16896	9.56589	0.000179655	0.00755188	1.29533	T
CDHR3	1.90831	4.33169	9.56317	0.000179907	0.00755188	1.29374	T
LOC121111245	1.48964	4.36575	9.54642	0.000181463	0.00758655	1.284	T
MYLK2	-0.585165	6.40826	-9.54419	0.000181672	0.00758655	1.2827	T
TMEM140	-0.620245	7.93292	-9.53196	0.000182819	0.0076148	1.27557	T
GLUD2	-0.619995	12.8641	-9.51872	0.000184071	0.00764724	1.26785	T
GLRX	0.999119	6.7122	9.49959	0.000185899	0.00767738	1.25667	T
PKIG	0.639495	8.72585	9.49395	0.000186442	0.00767738	1.25337	T
TAF9	0.726357	8.62094	9.48598	0.000187212	0.00767738	1.2487	T
LOC107052608	-0.92592	4.21636	-9.48533	0.000187275	0.00767738	1.24832	T
CSF3	4.26107	4.31741	9.48381	0.000187423	0.00767738	1.24743	T
MME	0.854861	10.4583	9.4815	0.000187647	0.00767738	1.24607	T
TRAF3	0.845835	10.6474	9.46762	0.000189002	0.0077133	1.23793	T
CEBPB	0.461891	13.6808	9.4536	0.000190382	0.00775003	1.22969	T
ALOX5AP	0.876344	9.4093	9.43247	0.000192484	0.00781591	1.21726	T
KCNJ2	0.483295	7.33664	9.42583	0.00019315	0.00782329	1.21335	T
LOC100858919	0.934949	10.104	9.40357	0.000195404	0.00789481	1.20021	T
PRDX1	0.476384	13.4129	9.37975	0.000197851	0.00797372	1.18612	T
LOC112530092	1.45656	0.894947	9.33832	0.000202192	0.00804834	1.16152	T
LOC121111646	1.45656	0.894947	9.33832	0.000202192	0.00804834	1.16152	T
LOC124417384	1.45656	0.894947	9.33832	0.000202192	0.00804834	1.16152	T
LOC124418131	1.45656	0.894947	9.33832	0.000202192	0.00804834	1.16152	T
ZNFY3	1.45656	0.894947	9.33832	0.000202192	0.00804834	1.16152	T
AHRR	-0.583406	8.23468	-9.31623	0.000204554	0.00811698	1.14837	T
ADGRL2	0.447436	8.89512	9.31217	0.000204991	0.00811698	1.14594	T
PLA2G4A	0.409892	10.7996	9.30817	0.000205423	0.00811698	1.14356	T
ARL10	0.83481	6.81271	9.29305	0.000207067	0.00815701	1.13453	T
FOS	-0.509625	10.9671	-9.28958	0.000207446	0.00815701	1.13245	T
ADM	2.7153	6.05174	9.26852	0.000209766	0.00822821	1.11985	T
GALC	0.53526	8.69128	9.25056	0.000211768	0.00828663	1.10908	T
DPF3	0.768676	4.53612	9.22589	0.000214556	0.00835193	1.09425	T
CTSC	-0.459925	11.4325	-9.22337	0.000214843	0.00835193	1.09273	T
LOC415787	1.04667	5.10107	9.22211	0.000214987	0.00835193	1.09197	T
MAP2K3	0.438717	11.0016	9.18611	0.000219143	0.00849298	1.07025	T
KLF2	-0.555819	9.52657	-9.1564	0.000222646	0.00860807	1.05226	T
DPEP2	-0.890116	10.2012	-9.12974	0.000225845	0.00870303	1.03608	T
ELMO1	-0.427243	11.434	-9.12498	0.000226421	0.00870303	1.03318	T
ST6GAL2	0.479989	10.7445	9.12255	0.000226717	0.00870303	1.0317	T
SELPLG	-0.395484	10.1595	-9.09453	0.000230153	0.00878777	1.01463	T
LOC121106673	1.92368	2.82159	9.09402	0.000230217	0.00878777	1.01432	T
PRNP	0.453345	10.8516	9.07565	0.000232504	0.00878777	1.0031	T
EDA	2.81128	4.84429	9.07381	0.000232734	0.00878777	1.00197	T
NRBP2	-0.411285	9.19412	-9.06888	0.000233354	0.00878777	0.998955	T
PEBP4	2.17795	4.12774	9.0629	0.000234107	0.00878777	0.995295	T
HOXD9	1.48179	8.43225	9.06059	0.000234399	0.00878777	0.993883	T
XDH	-0.932348	7.83706	-9.058	0.000234727	0.00878777	0.992295	T
IL10	1.74861	5.30244	9.05587	0.000234997	0.00878777	0.990991	T
SOCS2	0.433992	10.0045	9.05444	0.000235179	0.00878777	0.99011	T
VMP1	0.446871	11.987	9.04348	0.000236575	0.00878777	0.983392	T
RALGPS2	0.52419	9.00559	9.04318	0.000236613	0.00878777	0.98321	T
LOC107052855	0.92114	1.93388	9.04279	0.000236663	0.00878777	0.982968	T
MMR1L4	-0.751879	11.5477	-9.04262	0.000236685	0.00878777	0.982861	T
GADD45G	-0.573536	9.61539	-9.03952	0.000237081	0.00878777	0.980964	T
YLEC8	2.04062	2.79346	9.02224	0.000239309	0.00883366	0.970342	T
CPEB2	-0.707717	8.90753	-9.02144	0.000239412	0.00883366	0.969853	T
GADL1	-0.414193	8.18993	-9.01562	0.000240168	0.00884135	0.966274	T
LOC422513	-0.443536	9.24109	-9.00973	0.000240937	0.00884952	0.962642	T
SAMD15	0.953147	3.28559	9.00442	0.000241631	0.00885487	0.959377	T
PIK3IP1	0.478899	9.95755	8.97599	0.000245393	0.0089724	0.941829	T
COCH	-0.654123	14.4285	-8.96226	0.000247233	0.00901928	0.933342	T
LOC121108021	2.76364	1.54849	8.95489	0.00024823	0.00902264	0.928774	T
LOC428421	-0.57744	10.5656	-8.95331	0.000248442	0.00902264	0.927801	T
TNIP1	0.37162	11.9006	8.93015	0.000251604	0.00910752	0.913431	T
ACVR2A	0.524871	9.1593	8.92795	0.000251907	0.00910752	0.912068	T
STT3B	-0.373906	12.7959	-8.90897	0.000254537	0.00916302	0.900261	T
LOC121109130	-0.528977	6.22184	-8.90869	0.000254575	0.00916302	0.900091	T
LOC107052129	2.78944	1.56139	8.89047	0.000257131	0.00922042	0.888739	T
EMB	-0.481001	12.473	-8.8892	0.000257311	0.00922042	0.887943	T
ABCA1	-0.702107	10.9454	-8.87525	0.00025929	0.00927077	0.879236	T
LOC107052916	1.05258	3.35253	8.86899	0.000260183	0.00928217	0.875328	T
MGST1	0.44564	11.9874	8.85588	0.000262068	0.00928338	0.867124	T
CARF	0.645427	8.39526	8.85288	0.000262501	0.00928338	0.865246	T
STARD4	0.629223	10.7761	8.84935	0.000263013	0.00928338	0.863033	T
NPNT	1.01639	5.34447	8.84883	0.000263087	0.00928338	0.86271	T
RNF223	1.85619	4.77703	8.8455	0.00026357	0.00928338	0.860625	T
BBS10	-0.760824	4.60472	-8.84486	0.000263664	0.00928338	0.860221	T
SLC13A5	1.17522	4.08143	8.83264	0.000265447	0.00931852	0.85256	T
SQSTM1	0.416851	9.37217	8.83013	0.000265815	0.00931852	0.850983	T
STAB1	-0.449801	10.5768	-8.82293	0.000266874	0.0093354	0.846461	T
TKTL1	0.407492	12.3798	8.79069	0.000271679	0.00948296	0.826169	T
KCTD12	-0.344858	11.0222	-8.76747	0.000275202	0.00956723	0.811518	T
GGNBP2	0.355041	9.10158	8.76698	0.000275278	0.00956723	0.811204	T
J6367_mgt10	-0.514943	4.36797	-8.76288	0.000275905	0.00956846	0.808614	T
LOC107053557	1.14618	7.38484	8.73559	0.000280128	0.00969413	0.791334	T
PIK3CB	0.362237	10.5284	8.72802	0.000281314	0.00971434	0.78653	T
SLC26A2	0.737337	10.5233	8.71171	0.000283887	0.00978231	0.776169	T
AvBD1	0.465597	13.2705	8.69537	0.000286494	0.00985113	0.765769	T
LOC426820	-0.413669	13.4226	-8.68233	0.000288594	0.00990226	0.757458	T
SNX22	-0.593028	6.73866	-8.67636	0.000289561	0.00990845	0.753651	T
TSPAN18	0.837361	7.92773	8.66971	0.000290643	0.00990845	0.749405	T
LSP1P1	-0.434337	10.4793	-8.66698	0.00029109	0.00990845	0.747658	T
STAT1	-0.385925	10.2661	-8.66262	0.000291803	0.00990845	0.744874	T
TBCEL	0.55162	6.45357	8.66239	0.00029184	0.00990845	0.74473	T
CYP21A1	-0.475294	8.09509	-8.64569	0.000294593	0.00994852	0.73404	T
CLIP2	-0.413864	9.74704	-8.64478	0.000294743	0.00994852	0.733462	T
CLSTN1	0.418482	10.4073	8.64404	0.000294867	0.00994852	0.732985	T
SELP	-0.420306	8.50046	-8.6189	0.000299073	0.0100567	0.71686	T
ARHGEF18	-0.347756	10.4133	-8.61745	0.000299317	0.0100567	0.715933	T
CARD11	-0.663545	7.85126	-8.61156	0.000300314	0.0100651	0.712148	T
NT5C2	0.443461	10.705	8.60566	0.000301316	0.0100651	0.708354	T
SPI1	0.418368	12.5962	8.60456	0.000301504	0.0100651	0.707644	T
NEK6	0.457967	11.2898	8.6013	0.00030206	0.0100651	0.705546	T
ZUFSP	-0.399785	8.49713	-8.59218	0.000303621	0.0100963	0.699678	T
TESC	1.86987	4.7176	8.58415	0.000305005	0.0101178	0.694499	T
ITSN1	-0.430157	9.99789	-8.5788	0.00030593	0.0101178	0.691051	T
ASS1	-0.42439	12.1224	-8.57729	0.000306192	0.0101178	0.690075	T
EPB41L4B	-0.782655	6.20882	-8.57395	0.000306772	0.0101178	0.68792	T
LOC121107763	-1.05709	6.92807	-8.5596	0.000309278	0.0101593	0.678654	T
LOC107054125	0.840984	6.26819	8.5568	0.000309772	0.0101593	0.676839	T
COL5A1	-0.919871	5.81316	-8.55598	0.000309916	0.0101593	0.67631	T
GBP	-0.565583	7.99383	-8.54575	0.000311722	0.0101674	0.669691	T
NTNG2	0.91582	8.96344	8.54445	0.000311952	0.0101674	0.668851	T
EMP2	0.500369	7.07605	8.5439	0.000312051	0.0101674	0.668491	T
LOC121108935	0.80829	5.13932	8.53858	0.000312996	0.0101726	0.665046	T
DUSP4	-0.407431	12.5966	-8.53593	0.000313467	0.0101726	0.663334	T
LIPA	-0.349768	10.9458	-8.53081	0.000314383	0.0101819	0.66001	T
CYP1A1	2.36853	1.35093	8.48239	0.000323191	0.0104462	0.62853	T
EPB41	-0.447359	9.57795	-8.47335	0.00032487	0.0104795	0.622629	T
ZFAND2A	0.466313	8.10153	8.46807	0.000325854	0.0104903	0.619182	T
GPR35	2.71253	1.52293	8.44743	0.000329734	0.0105768	0.605694	T
LOC107052258	1.51136	3.22766	8.44487	0.00033022	0.0105768	0.604014	T
IFFO2	0.469086	9.42573	8.44337	0.000330504	0.0105768	0.603034	T
FES	-0.390307	10.6082	-8.43697	0.000331723	0.0105885	0.598842	T
PSEN1	0.650508	9.06124	8.43457	0.000332181	0.0105885	0.597266	T
CSGALNACT2	0.424956	9.86918	8.43004	0.000333048	0.0105952	0.594298	T
CYBC1	0.345214	11.2904	8.42201	0.00033459	0.0106234	0.589033	T
FMNL2	0.368973	8.16788	8.39214	0.000340403	0.0107868	0.569397	T
SIRPA	-0.456495	10.0945	-8.3783	0.000343138	0.0108051	0.560276	T
NAA38	1.48226	3.43645	8.37296	0.000344201	0.0108051	0.556751	T
LNPK	0.340763	9.54422	8.36824	0.000345142	0.0108051	0.553639	T
FNDC3A	0.333624	11.0307	8.36337	0.000346117	0.0108051	0.550421	T
SLC9A3R1	0.461182	12.6191	8.36206	0.000346381	0.0108051	0.549553	T
TRPC4	-0.685639	8.90833	-8.35993	0.000346808	0.0108051	0.548147	T
ETV6	0.40989	9.41739	8.35827	0.000347142	0.0108051	0.54705	T
LOC100859740	1.63982	4.07726	8.35802	0.000347192	0.0108051	0.546885	T
GTSE1	-0.412729	10.2571	-8.35722	0.000347354	0.0108051	0.546355	T
PCSK5	-0.53998	9.05245	-8.3552	0.00034776	0.0108051	0.545022	T
LOC416197	0.71601	6.85985	8.35235	0.000348336	0.0108051	0.543135	T
NIT2	0.346974	9.15817	8.34508	0.000349809	0.01083	0.538325	T
LOC121110976	-0.85249	2.74221	-8.34006	0.00035083	0.0108408	0.535001	T
ALAS1	0.534565	8.98745	8.32913	0.000353064	0.0108752	0.527761	T
LAMB3	3.55738	2.32535	8.32492	0.00035393	0.0108752	0.524969	T
GPR158	0.833015	7.72566	8.32277	0.000354374	0.0108752	0.52354	T
SMAD3	-0.567867	8.11252	-8.32151	0.000354634	0.0108752	0.522704	T
MAF	-0.649312	6.42748	-8.30758	0.000357523	0.010943	0.513449	T
LOC107049129	-0.597749	9.46293	-8.30177	0.000358736	0.0109594	0.509586	T
LOC121108011	0.649032	8.90499	8.28243	0.000362808	0.0110523	0.496714	T
ID2	-0.493102	10.2865	-8.28084	0.000363145	0.0110523	0.495654	T
B3GNT2	0.463705	10.9469	8.2734	0.00036473	0.0110797	0.490687	T
EMP1	-0.98994	6.56374	-8.26823	0.000365834	0.0110924	0.487239	T
NT5C3A	-0.44812	9.01852	-8.25954	0.0003677	0.0111281	0.481436	T
ETV1	-0.822678	6.72404	-8.2289	0.000374372	0.0113088	0.46092	T
CYP2U1	-0.360313	8.39769	-8.22285	0.000375705	0.0113107	0.456865	T
MAP2K6	-0.732098	8.90167	-8.22227	0.000375834	0.0113107	0.456473	T
HIST1H101	0.558043	7.37711	8.21306	0.000377874	0.0113509	0.450295	T
LOC112531791	4.32651	2.94317	8.20992	0.000378575	0.0113509	0.448182	T
PXN	0.452273	10.6015	8.19531	0.000381849	0.0113906	0.438356	T
LOC107054727	-0.915005	5.91133	-8.19333	0.000382294	0.0113906	0.437024	T
LOC107050775	0.537449	8.44897	8.19265	0.000382448	0.0113906	0.436565	T
H1FX	-0.382729	11.929	-8.18668	0.000383798	0.0113906	0.432544	T
ZBTB42	0.99904	6.34676	8.18262	0.000384719	0.0113906	0.429809	T
PGGHG	-0.415362	8.15318	-8.18236	0.000384779	0.0113906	0.429632	T
MRGBP	0.442904	9.543	8.18159	0.000384953	0.0113906	0.429115	T
TBC1D7	0.735627	8.19391	8.17902	0.000385538	0.0113906	0.427383	T
LOC121110431	0.744025	7.48269	8.17143	0.000387272	0.011421	0.422261	T
C15orf39	-0.523894	7.64257	-8.16031	0.00038983	0.0114755	0.414748	T
PDXK	0.443623	11.6279	8.15197	0.000391759	0.0115113	0.409113	T
C3AR1L	0.764339	8.40001	8.14737	0.000392829	0.0115218	0.405999	T
PRPSAP2	-0.48092	9.80048	-8.13674	0.000395314	0.0115676	0.398803	T
UCKL1	0.400605	9.02417	8.13458	0.000395821	0.0115676	0.397339	T
HHLA2	0.962561	7.80458	8.11886	0.000399536	0.0116551	0.386674	T
SMOC1	0.491808	6.9812	8.09731	0.000404695	0.0117843	0.372027	T
NFE2L2	0.353075	11.4411	8.08361	0.000408016	0.01182	0.362696	T
ORAI3	0.815561	8.98491	8.07768	0.000409463	0.01182	0.358652	T
TAGLN2	0.48411	12.2106	8.07369	0.000410441	0.01182	0.355928	T
GRASP	0.820465	7.86306	8.07367	0.000410446	0.01182	0.355915	T
LOC124417941	1.07694	3.21609	8.07318	0.000410567	0.01182	0.355579	T
FGB	-0.821231	2.52478	-8.07246	0.000410743	0.01182	0.35509	T
SEPTIN11	-0.44201	9.97572	-8.07124	0.000411042	0.01182	0.354257	T
LOC121113382	1.71097	1.02215	8.06782	0.000411883	0.0118232	0.351923	T
LOC112532525	2.02563	1.17948	8.0596	0.000413914	0.0118325	0.346307	T
LOC121110905	2.02563	1.17948	8.0596	0.000413914	0.0118325	0.346307	T
LOC112532884	1.50542	3.99297	8.05762	0.000414406	0.0118325	0.34495	T
PIWIL1	-0.518048	8.29024	-8.04221	0.000418249	0.0119212	0.33441	T
POU6F1	0.574914	5.91158	8.03927	0.000418989	0.0119213	0.33239	T
LOC121106732	1.85273	4.76592	8.03153	0.000420937	0.0119557	0.327091	T
MYO3B	0.583149	9.71907	8.02367	0.00042293	0.0119912	0.321697	T
TBXAS1	-0.613218	9.68989	-8.01007	0.000426403	0.0120649	0.312356	T
CHCHD2	0.423457	12.0284	8.00766	0.000427023	0.0120649	0.310697	T
SPIRE2	0.806015	7.16549	8.00281	0.000428271	0.012079	0.307364	T
WNK2	0.470142	8.39286	7.98152	0.000433805	0.0122138	0.292697	T
SPHKAP	0.7783	8.29102	7.97489	0.000435545	0.0122372	0.288123	T
CCSER1	-0.386489	7.49612	-7.96985	0.000436873	0.0122372	0.284647	T
HIP1	-0.462448	9.723	-7.96972	0.000436906	0.0122372	0.284559	T
ATCAY	0.533215	6.93264	7.96543	0.000438041	0.0122477	0.281596	T
CD200R1A	-0.816637	7.08059	-7.9565	0.000440415	0.0122928	0.27542	T
LOC100858941	1.77349	2.7465	7.94921	0.000442363	0.0123144	0.270377	T
KMT5B	0.72973	9.19927	7.94792	0.00044271	0.0123144	0.269481	T
NR4A2	0.923318	4.37616	7.94471	0.000443571	0.0123171	0.267261	T
DBI	0.367334	10.5804	7.93045	0.000447424	0.0124028	0.257378	T
PDCD4	-0.609422	13.5935	-7.9271	0.000448336	0.0124068	0.255052	T
DOT1L	0.419421	12.0279	7.92164	0.000449825	0.0124164	0.251264	T
LOC121107966	1.0779	5.3318	7.91904	0.000450537	0.0124164	0.249455	T
LOC121110138	1.37712	2.91534	7.9174	0.000450987	0.0124164	0.248316	T
LOC107052874	-0.474694	4.64362	-7.91282	0.000452243	0.0124298	0.245138	T
WDR12	0.342788	10.0318	7.90586	0.000454163	0.0124508	0.240297	T
C1QBP	0.463899	11.5643	7.90412	0.000454644	0.0124508	0.239087	T
ST8SIA1	2.11235	5.53134	7.89975	0.000455855	0.0124508	0.236047	T
LOC107049033	1.21087	3.8313	7.8989	0.000456092	0.0124508	0.235452	T
ANKH	-0.341554	9.53989	-7.88468	0.000460062	0.0125377	0.225548	T
SLC39A13	0.484784	9.51046	7.88197	0.000460825	0.0125377	0.223654	T
DENND2C	-0.496654	8.3836	-7.87682	0.000462274	0.012556	0.220064	T
CHST7	0.35257	10.9217	7.86107	0.000466746	0.0126562	0.209061	T
SLC36A1	-0.380553	9.71836	-7.85697	0.000467918	0.0126667	0.206193	T
KAT6B	-0.552124	8.14091	-7.84109	0.000472491	0.0127691	0.195077	T
FAM65B	-0.746961	8.46631	-7.83309	0.000474816	0.0127896	0.189465	T
CHCHD3	0.454691	10.2448	7.83303	0.000474834	0.0127896	0.189422	T
ATF1	0.34048	11.3341	7.8253	0.000477091	0.0128085	0.184	T
LOC121108033	0.816095	4.9675	7.82417	0.000477422	0.0128085	0.183208	T
TMPO	-0.392592	12.3952	-7.82251	0.00047791	0.0128085	0.182039	T
ZNF800	0.384803	9.77333	7.81166	0.000481107	0.0128512	0.174417	T
LOC770165	0.958947	5.68974	7.80985	0.000481643	0.0128512	0.173144	T
KCNH4	-0.370069	7.82845	-7.80728	0.000482407	0.0128512	0.171332	T
LOC428335	0.328167	10.6852	7.80415	0.000483336	0.0128512	0.169132	T
VWA5B1	-0.698762	6.82358	-7.80173	0.000484058	0.0128512	0.167427	T
MEIS1	0.51908	7.73812	7.801	0.000484275	0.0128512	0.166914	T
MGAT5B	-0.636432	9.3117	-7.79253	0.000486809	0.0128973	0.160945	T
RPS6KB1	0.352352	10.7804	7.78758	0.000488295	0.0129154	0.157461	T
GINS1	-0.399477	8.77644	-7.7815	0.000490132	0.0129429	0.153167	T
LOC107052158	1.20033	2.69645	7.77101	0.000493315	0.0129869	0.145765	T
GGACT	0.694924	5.25083	7.77071	0.000493407	0.0129869	0.145552	T
SH2B1	-0.599706	8.49415	-7.75398	0.00049854	0.0130933	0.133717	T
SVOPL	-0.967061	2.51109	-7.75225	0.000499072	0.0130933	0.132497	T
LOC121109080	-0.819652	3.55406	-7.74658	0.000500828	0.0131181	0.128481	T
LOC121107943	0.88602	7.01786	7.73767	0.000503604	0.0131695	0.122159	T
LOC107052210	1.1169	5.40507	7.72637	0.000507148	0.0132391	0.114139	T
USP21	-0.472465	8.09097	-7.72396	0.000507906	0.0132391	0.11243	T
DYSF	-0.347112	10.0681	-7.71265	0.000511487	0.0132981	0.104395	T
DNAH17	0.672574	12.3386	7.71163	0.000511812	0.0132981	0.103667	T
LAMP1	-0.35428	13.8042	-7.69182	0.000518165	0.0134415	0.0895565	T
MAP3K8	0.998881	7.78237	7.68048	0.000521843	0.0135152	0.0814653	T
FAM46C	-0.426631	9.46771	-7.67355	0.000524107	0.0135521	0.0765136	T
SEC23A	0.455829	8.38072	7.67039	0.000525141	0.0135572	0.0742582	T
C9orf72	-0.521199	8.22068	-7.66216	0.00052785	0.0136011	0.068372	T
LIPI	0.793859	3.42549	7.65825	0.000529144	0.0136011	0.0655713	T
LOC112530002	-1.03977	5.63029	-7.65758	0.000529365	0.0136011	0.0650928	T
TP53INP2	0.491868	9.10593	7.6512	0.000531484	0.0136225	0.060522	T
LOC107053808	1.26813	4.03542	7.64871	0.000532311	0.0136225	0.0587427	T
TMTC2	0.516098	9.06387	7.64747	0.000532727	0.0136225	0.0578495	T
SPECC1	-0.471822	8.14064	-7.64208	0.000534527	0.0136469	0.0539905	T
CMPK2	-0.631777	8.05392	-7.63947	0.000535403	0.0136477	0.0521176	T
RSFR	-0.623302	13.3612	-7.63191	0.000537949	0.0136717	0.0466886	T
C16orf59	-0.511822	8.73365	-7.63165	0.000538037	0.0136717	0.0465021	T
SH3KBP1	-0.333461	12.3934	-7.62317	0.000540909	0.0137231	0.0404096	T
TRPC6	1.53156	6.13473	7.6092	0.000545681	0.0138225	0.0303592	T
LOC101749404	-0.889365	5.72664	-7.59463	0.00055071	0.0139281	0.0198611	T
ZNF326	-0.340406	10.3701	-7.58261	0.0005549	0.0140121	0.0111865	T
NLRC5	0.572911	10.9811	7.57873	0.000556261	0.0140166	0.00838378	T
PGM3	0.430641	9.46289	7.57715	0.000556815	0.0140166	0.00724517	T
ZMYM2	-0.339426	9.14572	-7.55433	0.000564906	0.0141908	-0.00926708	T
KAT2B	0.427559	9.86917	7.55271	0.000565488	0.0141908	-0.0104444	T
NGEF	1.33977	6.38239	7.5469	0.000567573	0.014221	-0.0146566	T
DAP	-0.46725	11.6494	-7.54347	0.000568808	0.0142299	-0.0171449	T
RAD51B	0.543458	8.2518	7.53115	0.000573271	0.0143029	-0.0260919	T
ADAMTS9	1.13322	7.45271	7.53052	0.000573498	0.0143029	-0.0265441	T
YWHAZ	0.386557	13.0458	7.52622	0.000575069	0.0143097	-0.0296755	T
PLEKHA2	-0.342375	10.5114	-7.52493	0.000575541	0.0143097	-0.0306142	T
ANKRD22	-0.530691	7.08134	-7.50729	0.000582032	0.0144307	-0.0434529	T
LOC121106469	-0.626812	5.42262	-7.50686	0.000582192	0.0144307	-0.0437672	T
LOC107053940	-0.799347	4.56361	-7.49109	0.000588068	0.014554	-0.0552643	T
ZNF706	0.338727	12.0819	7.4849	0.000590396	0.0145893	-0.0597868	T
PCBD1	0.322037	7.96073	7.47579	0.000593839	0.014652	-0.0664444	T
DTNB	0.563092	8.62207	7.47043	0.000595875	0.0146798	-0.070363	T
PHEX	-0.553983	7.75493	-7.46764	0.000596939	0.0146836	-0.0724055	T
KDM4B	0.314646	9.11796	7.46079	0.000599561	0.0147257	-0.0774246	T
TSPO	0.475962	11.0826	7.45558	0.000601566	0.0147525	-0.081247	T
ADD3	0.342594	10.463	7.44161	0.000606974	0.0148626	-0.0914943	T
LAPTM4B	0.532868	6.07887	7.43591	0.000609196	0.0148944	-0.0956793	T
ASPH	0.605199	10.2841	7.42927	0.000611798	0.0149354	-0.100559	T
GJC3	0.427456	11.1996	7.41864	0.000615991	0.0150083	-0.108382	T
MOB3C	0.387406	8.85632	7.41701	0.000616638	0.0150083	-0.109583	T
LZTS3	0.844047	9.19773	7.3945	0.000625641	0.0152045	-0.126183	T
ITM2A	-0.308351	13.1106	-7.38968	0.000627592	0.0152215	-0.129748	T
LOC107054225	0.482627	7.48625	7.38072	0.000631232	0.0152215	-0.136372	T
LCLAT1	0.433848	10.8324	7.37468	0.000633696	0.0152215	-0.140834	T
CREM	0.870869	7.61165	7.37371	0.000634096	0.0152215	-0.141557	T
GSTT1	-0.570632	7.11971	-7.37314	0.000634329	0.0152215	-0.141977	T
PLD4	-0.996993	5.52065	-7.36687	0.000636907	0.0152215	-0.146624	T
AMPD3	0.412813	9.74879	7.36648	0.000637067	0.0152215	-0.146911	T
BTC	0.503591	4.43351	7.3661	0.000637222	0.0152215	-0.147189	T
ATF3	0.480896	9.47074	7.35624	0.000641305	0.0152215	-0.154505	T
J6367_mgt11	-0.737203	4.89645	-7.35115	0.000643421	0.0152215	-0.158278	T
LOC124417086	0.855925	6.9255	7.34806	0.000644713	0.0152215	-0.160576	T
CD40	0.368344	11.048	7.34795	0.000644755	0.0152215	-0.160652	T
ORMDL3	0.385906	9.36219	7.34645	0.000645385	0.0152215	-0.161769	T
LOC121107963	1.07945	5.68745	7.33073	0.000652004	0.0152215	-0.173457	T
PIGL	0.764432	5.8039	7.32625	0.000653901	0.0152215	-0.176785	T
FAM149B1	0.394873	9.54025	7.32621	0.000653919	0.0152215	-0.176817	T
NR1D2	-0.297431	9.12966	-7.32078	0.000656234	0.0152215	-0.180865	T
CCDC89	0.615831	0.474582	7.32019	0.000656482	0.0152215	-0.181299	T
GPRC5A	0.615831	0.474582	7.32019	0.000656482	0.0152215	-0.181299	T
HOXA10-AS	0.615831	0.474582	7.32019	0.000656482	0.0152215	-0.181299	T
LOC107051651	0.615831	0.474582	7.32019	0.000656482	0.0152215	-0.181299	T
LOC112531329	0.615831	0.474582	7.32019	0.000656482	0.0152215	-0.181299	T
LOC121107777	0.615831	0.474582	7.32019	0.000656482	0.0152215	-0.181299	T
LOC121108712	0.615831	0.474582	7.32019	0.000656482	0.0152215	-0.181299	T
LOC121108873	0.615831	0.474582	7.32019	0.000656482	0.0152215	-0.181299	T
LOC121109581	0.615831	0.474582	7.32019	0.000656482	0.0152215	-0.181299	T
LOC124417432	0.615831	0.474582	7.32019	0.000656482	0.0152215	-0.181299	T
LOC124417876	0.615831	0.474582	7.32019	0.000656482	0.0152215	-0.181299	T
PLBD1	0.615831	0.474582	7.32019	0.000656482	0.0152215	-0.181299	T
SLC2A2	0.615831	0.474582	7.32019	0.000656482	0.0152215	-0.181299	T
TAS1R3	0.615831	0.474582	7.32019	0.000656482	0.0152215	-0.181299	T
UCP3	0.615831	0.474582	7.32019	0.000656482	0.0152215	-0.181299	T
HMGN4	-0.356564	12.4756	-7.30452	0.000663215	0.0153539	-0.192988	T
LOC121113273	0.776658	3.08819	7.30249	0.000664091	0.0153539	-0.1945	T
SYNGR3	0.34839	11.0555	7.29847	0.000665835	0.0153722	-0.197505	T
LOC107057415	-0.321732	7.00889	-7.29299	0.000668221	0.0154053	-0.201602	T
LOC771545	-0.296522	9.58655	-7.28899	0.000669963	0.0154112	-0.204586	T
GRK4	-0.37493	12.7621	-7.28248	0.000672818	0.0154112	-0.209458	T
LOC121110046	1.41239	2.71587	7.28218	0.000672952	0.0154112	-0.209686	T
GRPEL2	0.441113	7.1363	7.28189	0.000673078	0.0154112	-0.2099	T
ARMC2	0.606963	7.36307	7.28151	0.000673246	0.0154112	-0.210187	T
UNG	-0.342506	9.42442	-7.27659	0.000675414	0.0154384	-0.21387	T
BCL2L11	0.375011	8.23373	7.27448	0.000676344	0.0154384	-0.215447	T
BST1	0.563227	11.5169	7.26954	0.000678533	0.0154388	-0.219149	T
TNFRSF4	-0.4666	7.53008	-7.26543	0.00068036	0.0154388	-0.22223	T
LOC121111456	0.82345	5.04995	7.26428	0.000680873	0.0154388	-0.223093	T
SRC	-0.329023	9.74163	-7.26372	0.000681124	0.0154388	-0.223516	T
ATP6V1C2	-0.330778	8.43558	-7.26208	0.000681857	0.0154388	-0.224747	T
AvBD7	0.48394	12.234	7.26155	0.000682093	0.0154388	-0.225144	T
NFATC1	0.579418	6.74805	7.25604	0.000684557	0.015449	-0.229276	T
RFX2	-0.581094	7.93573	-7.25358	0.000685662	0.015449	-0.231125	T
MYL12A	0.334208	11.1243	7.25265	0.000686079	0.015449	-0.231821	T
DISP3	-0.323125	9.47542	-7.25201	0.00068637	0.015449	-0.232306	T
TOMM7	0.566977	8.9867	7.23129	0.000695767	0.0156388	-0.247889	T
MTSS1	-0.329541	9.98519	-7.22553	0.000698404	0.0156763	-0.252224	T
LOC100858567	0.892183	6.69784	7.21417	0.000703648	0.0157645	-0.260795	T
GPR155	0.658974	9.00483	7.21117	0.000705039	0.0157645	-0.263059	T
GALNT14	0.703474	6.19402	7.20896	0.000706063	0.0157645	-0.264722	T
SLC35F2	0.564963	8.2695	7.20859	0.000706237	0.0157645	-0.265004	T
LOC124417461	0.617996	6.93383	7.20384	0.000708454	0.0157922	-0.268596	T
RASSF6	-0.587508	8.03071	-7.2004	0.000710062	0.0158062	-0.271195	T
CLEC5A	0.668678	7.19962	7.19605	0.0007121	0.0158224	-0.27448	T
BICDL1	2.35309	1.34321	7.19293	0.000713567	0.0158224	-0.276837	T
LOC418086	0.854114	3.10468	7.18924	0.000715309	0.0158224	-0.279632	T
LOC107053449	1.35599	2.87064	7.18772	0.000716029	0.0158224	-0.280785	T
GAB2	0.91721	8.29855	7.18772	0.00071603	0.0158224	-0.280786	T
S100A16	0.397368	9.9713	7.18638	0.000716663	0.0158224	-0.2818	T
FAM3D	0.534311	6.46374	7.18385	0.000717861	0.0158272	-0.283714	T
ARPC3	0.335504	10.9794	7.18179	0.000718839	0.0158272	-0.285274	T
LOC112532527	0.938253	3.74626	7.17243	0.000723301	0.0159038	-0.292367	T
LOC121108671	-0.840543	7.29452	-7.16058	0.000729	0.0159643	-0.301362	T
LOC101749252	-0.99065	1.27782	-7.16054	0.000729018	0.0159643	-0.30139	T
LOC107054373	-0.99065	1.27782	-7.16054	0.000729018	0.0159643	-0.30139	T
TADA1	-0.357629	8.74912	-7.15704	0.000730713	0.0159798	-0.304052	T
LOC121107814	0.594884	6.7512	7.14996	0.000734149	0.0160332	-0.309428	T
JUP	0.688213	9.29378	7.14001	0.000739017	0.0161177	-0.317003	T
LOC112530844	2.76907	2.01453	7.13545	0.00074126	0.016132	-0.320478	T
KRAS	-0.364475	7.78355	-7.13462	0.000741669	0.016132	-0.321109	T
LOC100859492	1.14004	5.51219	7.12733	0.000745273	0.0161887	-0.326667	T
LOC107052278	1.57423	4.075	7.1238	0.000747023	0.0162049	-0.329355	T
LOC428417	0.444904	9.88517	7.11573	0.000751049	0.0162704	-0.335517	T
FAM171A1	-0.447976	6.55897	-7.10336	0.000757269	0.0163832	-0.344972	T
SOCS1	1.06716	5.59804	7.10121	0.000758354	0.0163847	-0.346613	T
LOC121110552	3.87265	3.50269	7.09768	0.000760143	0.016393	-0.349314	T
CHST3	-0.528304	5.0171	-7.09645	0.000760767	0.016393	-0.350254	T
DUSP8	2.07452	5.55343	7.09331	0.000762366	0.0164056	-0.352661	T
DAW1	0.860306	4.88697	7.091	0.000763541	0.016409	-0.354427	T
MCAM	-0.522358	8.13424	-7.08285	0.000767714	0.0164433	-0.360676	T
TTF2	-0.306221	9.77662	-7.08228	0.000768004	0.0164433	-0.361108	T
CNOT6	-0.36872	10.3251	-7.08186	0.000768219	0.0164433	-0.361429	T
ANKDD1B	1.7225	5.28548	7.07994	0.000769208	0.0164433	-0.362904	T
LOC107049457	-0.737962	5.65007	-7.07793	0.000770244	0.0164437	-0.364447	T
LSS	0.302141	11.5108	7.06837	0.000775187	0.0165076	-0.371781	T
UVRAG	-0.335263	10.6144	-7.0682	0.000775279	0.0165076	-0.371918	T
PKN2	-0.377628	10.8902	-7.0654	0.000776732	0.0165087	-0.374063	T
GRAMD1B	0.406205	9.02917	7.06417	0.000777372	0.0165087	-0.375009	T
DUSP22AL	-0.688509	3.91535	-7.0609	0.000779078	0.0165142	-0.377521	T
MOCOS	-0.496668	6.21677	-7.05976	0.000779675	0.0165142	-0.3784	T
CASZ1	2.0079	4.63527	7.05526	0.000782032	0.0165286	-0.381861	T
CYFIP1	0.29256	10.7134	7.05426	0.000782556	0.0165286	-0.382628	T
FBXO5	-0.404865	8.421	-7.05261	0.000783423	0.0165286	-0.383898	T
SURF4	0.32256	12.1991	7.04123	0.000789437	0.0165915	-0.392666	T
LOC112531816	-0.775563	5.28475	-7.04106	0.000789527	0.0165915	-0.392796	T
FYN	0.486407	10.6584	7.04021	0.000789974	0.0165915	-0.393447	T
HOXD8	0.348082	9.90653	7.0392	0.000790513	0.0165915	-0.394229	T
LOC112532479	1.6384	4.11968	7.03113	0.000794813	0.0166419	-0.400448	T
ADAMDEC1	-0.624813	7.40504	-7.02949	0.00079569	0.0166419	-0.401713	T
LOC112533469	-0.868927	2.54863	-7.02647	0.000797312	0.0166419	-0.404048	T
SLC22A15	-0.353411	8.2304	-7.02201	0.000799707	0.0166419	-0.407487	T
CNTF	0.368141	6.5625	7.02132	0.000800082	0.0166419	-0.408024	T
ELAC2	0.344728	9.435	7.01941	0.000801111	0.0166419	-0.409497	T
TMC7	-0.377002	8.69197	-7.01699	0.00080242	0.0166419	-0.41137	T
KRT8	-0.663767	3.632	-7.01587	0.000803025	0.0166419	-0.412234	T
SCIN	0.412473	10.7255	7.01544	0.000803256	0.0166419	-0.412565	T
CKAP2L	-0.319394	9.49575	-7.01288	0.000804647	0.0166419	-0.414547	T
PPP2CA	-0.485284	7.83809	-7.01277	0.000804707	0.0166419	-0.414634	T
LOC101748546	-0.440064	9.62427	-7.01173	0.000805271	0.0166419	-0.415437	T
SPATA5L1	0.317819	10.3541	7.00796	0.000807318	0.0166629	-0.418348	T
PRDX4	-0.314808	8.82876	-7.00387	0.000809554	0.0166878	-0.42152	T
TBC1D16	-0.315073	8.84229	-6.99973	0.000811817	0.0167131	-0.424721	T
LOC107054398	1.11464	4.68012	6.99332	0.00081534	0.0167643	-0.429686	T
C1QC	-1.0227	10.3108	-6.98946	0.00081747	0.0167867	-0.432678	T
CD200R1B	-0.780519	3.52339	-6.98461	0.000820157	0.0168205	-0.436441	T
GPRIN3	-0.449608	10.5297	-6.98131	0.00082199	0.0168268	-0.439002	T
MAP3K14	0.480698	11.6818	6.98032	0.000822545	0.0168268	-0.439776	T
MATK	-0.311892	9.11502	-6.97542	0.000825278	0.0168613	-0.44358	T
FANCF	-0.37862	8.49204	-6.96847	0.000829172	0.0169047	-0.448978	T
AvBD6	1.53431	6.41847	6.96637	0.000830355	0.0169047	-0.450613	T
PCOLCE2	1.26288	3.08713	6.96605	0.000830537	0.0169047	-0.450864	T
LOC121109193	-1.09654	7.0502	-6.96256	0.000832502	0.0169174	-0.453574	T
LOC107053008	-0.550986	6.62261	-6.96077	0.000833516	0.0169174	-0.45497	T
HPGDS	0.536208	8.41022	6.95937	0.000834305	0.0169174	-0.456055	T
EVI2B	0.741914	5.83857	6.9538	0.000837468	0.0169603	-0.460395	T
LOC124417201	1.53695	2.62823	6.95108	0.000839017	0.0169704	-0.462513	T
GJA9	-0.763943	2.79172	-6.94141	0.000844549	0.0170609	-0.470051	T
LOC121106674	0.799211	7.38259	6.93357	0.000849065	0.0171141	-0.476167	T
HOXA13	1.25054	3.24052	6.93161	0.000850201	0.0171141	-0.477701	T
AQP11	-0.770156	4.54844	-6.93134	0.000850356	0.0171141	-0.47791	T
PLCG1	-0.462448	9.42311	-6.92753	0.000852566	0.017121	-0.480887	T
TXNRD1	-0.378559	10.5512	-6.9271	0.000852817	0.017121	-0.481224	T
HIVEP3	-0.484749	10.3903	-6.92453	0.00085431	0.0171297	-0.483231	T
LOC107055489	1.00271	2.63177	6.91592	0.000859342	0.0171914	-0.489966	T
SAMD9L	-0.690903	7.12297	-6.91245	0.000861377	0.0171914	-0.492679	T
MTURN	0.346606	9.91855	6.91225	0.000861496	0.0171914	-0.492838	T
NEK8	-0.289103	8.15082	-6.912	0.000861644	0.0171914	-0.493034	T
SOGA1	-0.298733	10.9881	-6.90744	0.000864331	0.0172237	-0.496606	T
OSBPL3	0.515916	10.438	6.8864	0.000876855	0.0174518	-0.513106	T
NUFIP2	-0.383721	11.2867	-6.88441	0.000878051	0.0174541	-0.514671	T
YPEL2	0.415104	8.6461	6.87687	0.000882599	0.0174698	-0.520597	T
LOC121109905	2.08799	1.21066	6.87388	0.000884409	0.0174698	-0.522946	T
ABCC1	0.31788	11.5972	6.87368	0.00088453	0.0174698	-0.523103	T
SLCO2A1	0.764221	8.13889	6.87275	0.000885096	0.0174698	-0.523837	T
PICALM	0.427233	8.20865	6.87089	0.000886224	0.0174698	-0.525297	T
ACR	1.45735	2.83471	6.86958	0.000887022	0.0174698	-0.52633	T
MMP9	2.49544	1.41439	6.86746	0.000888313	0.0174698	-0.527999	T
SYNJ2	-0.644408	6.07086	-6.86659	0.000888844	0.0174698	-0.528684	T
CERS2	0.327388	10.8365	6.86581	0.000889317	0.0174698	-0.529294	T
C10H15ORF48	0.594439	9.26781	6.86526	0.000889653	0.0174698	-0.529727	T
LOC107049469	1.16066	4.28932	6.86292	0.000891083	0.0174767	-0.53157	T
LOC107054183	-0.895737	4.98713	-6.85713	0.000894637	0.0175251	-0.536136	T
LOC121108590	-0.664245	5.82784	-6.85299	0.000897182	0.0175537	-0.539394	T
HLX	-0.38478	11.2615	-6.84933	0.000899446	0.0175767	-0.542285	T
LOC107051858	1.65082	2.68516	6.84526	0.000901969	0.0176047	-0.545499	T
LAMB2	-0.478934	12.6735	-6.83806	0.000906446	0.0176708	-0.551179	T
AFF4	0.302097	11.1419	6.83258	0.000909878	0.0176969	-0.555515	T
UAP1L1	-0.28376	11.6735	-6.83242	0.000909976	0.0176969	-0.555637	T
CAND2	0.381494	9.64227	6.82143	0.000916902	0.0177551	-0.564336	T
LOC124418115	0.936568	5.45783	6.82142	0.000916908	0.0177551	-0.564343	T
IKBKE	0.399895	11.0076	6.81701	0.000919705	0.0177551	-0.567838	T
RASSF2	-0.332542	10.1236	-6.81656	0.000919985	0.0177551	-0.568187	T
EBF2	0.271521	8.45147	6.81631	0.00092015	0.0177551	-0.568393	T
LOC100857541	2.52442	2.73552	6.8157	0.000920534	0.0177551	-0.568871	T
CYBRD1	-0.269173	8.85905	-6.81519	0.000920857	0.0177551	-0.569274	T
PLCB2	-0.605104	8.5049	-6.81378	0.000921759	0.0177551	-0.570397	T
TOM1L2	0.328565	7.58621	6.80413	0.000927926	0.0178357	-0.578047	T
C5AR1	2.56231	1.44782	6.80259	0.000928916	0.0178357	-0.579271	T
LOC101747742	0.872597	3.92413	6.80206	0.000929252	0.0178357	-0.579685	T
LYSMD1	0.499039	7.01224	6.79746	0.000932218	0.0178714	-0.583341	T
HPD	0.472239	7.2918	6.79503	0.000933784	0.0178802	-0.585268	T
FERMT2	0.331015	10.3003	6.78739	0.000938741	0.0179438	-0.591342	T
AMACR	0.318296	8.60025	6.7848	0.000940426	0.0179438	-0.593399	T
TMEM255A	-0.284483	10.9156	-6.78327	0.000941425	0.0179438	-0.594618	T
CAPNS2	0.745758	6.47193	6.78143	0.000942629	0.0179438	-0.596083	T
LOC121107883	0.571794	4.43539	6.78138	0.000942659	0.0179438	-0.59612	T
LOC121110452	0.960298	6.90462	6.77867	0.00094443	0.0179564	-0.598273	T
PTAFR	0.666619	8.51972	6.77462	0.000947089	0.0179849	-0.601499	T
NOS1AP	0.57719	5.90741	6.77073	0.00094965	0.0179849	-0.604598	T
PACSIN2	0.479087	12.4571	6.77001	0.000950124	0.0179849	-0.605171	T
IQSEC1	0.465553	10.4934	6.76963	0.000950378	0.0179849	-0.605477	T
WASHC1	0.289082	9.34556	6.76754	0.000951761	0.0179899	-0.607145	T
TACC1	-0.441484	14.2285	-6.76479	0.000953578	0.0180032	-0.609333	T
GNPDA1	0.311384	11.0156	6.76076	0.000956254	0.0180327	-0.612549	T
MAPK4	0.296729	13.1335	6.7546	0.000960358	0.0180733	-0.617463	T
LDHA	-0.335625	15.4529	-6.75417	0.000960643	0.0180733	-0.617803	T
CD82	0.329975	11.255	6.75038	0.00096318	0.0180999	-0.620829	T
LOC107055991	-0.413405	8.577	-6.74844	0.000964486	0.0181034	-0.622384	T
ATG7	0.341341	8.16319	6.74199	0.000968828	0.0181614	-0.627537	T
CYP4V2	-0.400966	7.62225	-6.74052	0.000969821	0.0181614	-0.628713	T
ANKS1A	-0.35518	8.8247	-6.73032	0.000976742	0.018262	-0.636872	T
PCSK4	-0.926709	2.2365	-6.72928	0.000977454	0.018262	-0.637708	T
PRMT3	-0.311683	9.3056	-6.72638	0.000979431	0.0182721	-0.640028	T
RNF13	0.273904	11.4955	6.72517	0.000980258	0.0182721	-0.640995	T
SYNGAP1	0.556103	10.7651	6.71775	0.000985352	0.0183459	-0.646943	T
IFT122	0.407835	8.68285	6.71559	0.00098684	0.0183525	-0.648675	T
HCK	-0.569429	7.43456	-6.70666	0.000993023	0.0184463	-0.655842	T
KCTD12B	-0.844834	5.56289	-6.70467	0.000994407	0.0184508	-0.65744	T
TAPBPL	0.275932	7.64459	6.70026	0.000997484	0.0184866	-0.660985	T
NHEJ1	-0.322714	7.67189	-6.69823	0.000998905	0.0184918	-0.662619	T
PPIL3	0.762585	6.03438	6.69494	0.00100121	0.0185132	-0.665262	T
ARL6IP4	-0.338786	9.00163	-6.68343	0.00100933	0.0186217	-0.674527	T
KLHL28	0.39158	8.69705	6.68335	0.00100938	0.0186217	-0.674591	T
NSDHL	0.408012	9.27083	6.68093	0.0010111	0.0186321	-0.676541	T
PLACL2	-0.671041	9.79873	-6.66933	0.00101937	0.0187631	-0.68589	T
ZBTB40	-0.386027	6.79297	-6.65712	0.00102817	0.0188975	-0.695753	T
MAP3K5	0.380014	10.4084	6.65569	0.0010292	0.0188975	-0.696905	T
KCNMA1	-0.412339	8.18236	-6.65435	0.00103018	0.0188975	-0.697993	T
LOC101751171	0.486998	12.0605	6.64885	0.00103417	0.0189493	-0.702436	T
GTF2I	-0.300453	9.36064	-6.64392	0.00103778	0.0189751	-0.70643	T
IFNGR2	0.444774	9.79039	6.64273	0.00103865	0.0189751	-0.707392	T
ZFYVE26	0.311513	9.10666	6.64032	0.00104041	0.0189751	-0.709342	T
TNFRSF18	-0.44131	8.48159	-6.63936	0.00104112	0.0189751	-0.710121	T
LOC101749091	-0.605072	4.54604	-6.63891	0.00104145	0.0189751	-0.710487	T
AP3S2	-0.287125	9.93999	-6.63594	0.00104364	0.0189935	-0.71289	T
BRAF	0.355531	10.6235	6.63421	0.00104491	0.0189953	-0.714289	T
LOC112532917	1.58467	3.51655	6.62966	0.00104827	0.0190238	-0.717979	T
TNKS2	0.315087	9.78673	6.6289	0.00104883	0.0190238	-0.718592	T
SCN1A	-0.671278	3.64205	-6.62689	0.00105033	0.0190296	-0.720228	T
LOC107053791	-0.751728	5.71726	-6.61718	0.00105756	0.0191222	-0.728105	T
JAZF1	0.472928	7.19388	6.61686	0.00105781	0.0191222	-0.728368	T
LOC121109434	1.91278	1.12306	6.61051	0.00106257	0.0191727	-0.733527	T
ZNF365	0.356755	9.81438	6.60825	0.00106427	0.0191727	-0.735361	T
RIPK4	0.598219	8.65442	6.60716	0.0010651	0.0191727	-0.736251	T
B3GNT4	-0.627036	7.02151	-6.60659	0.00106552	0.0191727	-0.73671	T
TRAK2	0.5016	8.73796	6.60443	0.00106716	0.0191727	-0.738472	T
ATF6B	0.360924	9.88355	6.60369	0.00106772	0.0191727	-0.739073	T
SKAP2	0.322137	9.81854	6.59177	0.00107678	0.0192968	-0.748773	T
CADPS	0.289164	11.8178	6.59147	0.00107702	0.0192968	-0.749023	T
LOC101749597	-0.535776	7.28803	-6.58721	0.00108028	0.019333	-0.752492	T
PRDM15	0.501482	10.2562	6.5857	0.00108143	0.019333	-0.753719	T
VASH1	-0.27411	12.8498	-6.5841	0.00108267	0.0193337	-0.755027	T
NFIB	-0.54987	7.40715	-6.57687	0.00108825	0.0194119	-0.760928	T
POLR3E	0.347635	8.90835	6.57462	0.00108999	0.0194215	-0.762765	T
RASSF7	-0.448893	7.29907	-6.56987	0.00109368	0.0194658	-0.766645	T
LOC107049408	-0.488071	4.95492	-6.56799	0.00109514	0.0194704	-0.768178	T
EVA1A	0.422812	6.81924	6.56512	0.00109738	0.0194833	-0.77052	T
RFX5	-0.332841	8.82012	-6.56397	0.00109828	0.0194833	-0.77146	T
CCLL4	2.58386	4.96815	6.56085	0.00110072	0.0195053	-0.774014	T
E2F7	-0.332523	9.42493	-6.55694	0.0011038	0.0195383	-0.777215	T
YBEY	0.463172	6.91919	6.5553	0.00110509	0.0195398	-0.778558	T
MYO5A	0.336236	10.4697	6.5528	0.00110706	0.0195532	-0.780603	T
LOC112532597	1.40922	3.18826	6.54994	0.00110932	0.0195635	-0.782942	T
LOC101752166	0.867718	4.94274	6.5481	0.00111078	0.0195635	-0.784453	T
LPAR2	0.79981	8.36073	6.54646	0.00111208	0.0195635	-0.785794	T
NLRP3	-0.498388	8.07353	-6.54595	0.00111248	0.0195635	-0.786211	T
MAT2L2	-0.283838	10.5369	-6.54067	0.00111669	0.0195961	-0.790537	T
SLC18A1	1.53016	2.71144	6.54058	0.00111676	0.0195961	-0.790616	T
NT5DC2	-0.353892	11.0667	-6.53675	0.00111982	0.0196273	-0.793758	T
RAB3C	1.58176	6.13292	6.53531	0.00112097	0.0196273	-0.794936	T
GLI2	1.56105	0.947192	6.53041	0.00112491	0.019675	-0.79896	T
MDFIC	-0.477071	12.0471	-6.52672	0.00112788	0.0197048	-0.801987	T
IFT57	0.552759	7.37565	6.52305	0.00113085	0.0197048	-0.805004	T
CDK18	-0.456555	9.30948	-6.5221	0.00113162	0.0197048	-0.805786	T
TBC1D15	0.35261	10.8867	6.52075	0.00113271	0.0197048	-0.806891	T
RCSD1	-0.32674	10.2485	-6.51409	0.00113813	0.0197777	-0.81237	T
TBX2	0.507899	6.81836	6.51205	0.0011398	0.0197855	-0.814054	T
SGPL1	0.733124	8.89538	6.50622	0.00114457	0.0198374	-0.818848	T
TROJANZ	-0.602955	9.33275	-6.5054	0.00114524	0.0198374	-0.819524	T
PRELID3B	0.330113	10.5582	6.50377	0.00114658	0.0198393	-0.820866	T
DLGAP4	-0.324714	10.4056	-6.49649	0.00115259	0.019922	-0.826868	T
FOXN3	-0.441127	11.0716	-6.48852	0.00115922	0.0200036	-0.833445	T
GK5	0.802435	7.46367	6.48782	0.0011598	0.0200036	-0.834018	T
LOC107049221	0.380016	8.94809	6.48635	0.00116103	0.0200036	-0.835233	T
PNN	-0.327802	11.9976	-6.47939	0.00116685	0.0200631	-0.840981	T
PIAS1	-0.293612	10.0953	-6.47836	0.00116772	0.0200631	-0.841837	T
GLDC	-0.520872	4.21347	-6.47778	0.00116821	0.0200631	-0.842313	T
TGFB1	0.359123	11.9708	6.47384	0.00117153	0.0200956	-0.845568	T
SMC4	-0.426911	9.45763	-6.47259	0.00117259	0.0200956	-0.846606	T
LOC101747995	1.97242	1.15288	6.46993	0.00117483	0.0201128	-0.848802	T
TRAPPC2L	0.414188	8.15993	6.45364	0.00118873	0.0203099	-0.862301	T
IDS	-0.438143	7.31783	-6.45337	0.00118896	0.0203099	-0.862524	T
ZNF503	1.12908	7.07437	6.45202	0.00119011	0.0203099	-0.86364	T
PARVA	0.448643	9.31645	6.44926	0.0011925	0.020329	-0.865933	T
IL31RA	-0.39323	9.53402	-6.44377	0.00119723	0.0203678	-0.870481	T
SPHK1	0.399061	11.7861	6.4437	0.00119729	0.0203678	-0.870539	T
SLC25A47	0.310521	8.74047	6.43682	0.00120327	0.0204322	-0.876257	T
FAM8A1	0.311705	8.72377	6.43643	0.0012036	0.0204322	-0.876578	T
LIG4	-0.464963	6.31587	-6.41747	0.00122026	0.0206927	-0.892357	T
CSF3R	-0.318605	14.071	-6.4156	0.00122191	0.0206927	-0.893907	T
ARHGEF4	-0.657104	1.80186	-6.41111	0.0012259	0.0206927	-0.89765	T
LOC112532907	0.657104	1.80186	6.41111	0.0012259	0.0206927	-0.89765	T
SEC14L5	0.468806	9.60025	6.41068	0.00122629	0.0206927	-0.898011	T
STX11	0.824165	7.87717	6.41029	0.00122663	0.0206927	-0.898333	T
ANKRD29	1.38021	3.24312	6.39177	0.00124326	0.0209188	-0.91379	T
LOC121107201	1.08506	2.01584	6.39101	0.00124395	0.0209188	-0.914426	T
TMPRSS11F	1.23338	3.16971	6.38969	0.00124515	0.0209188	-0.915532	T
TP53I11	0.347967	9.27416	6.38962	0.00124521	0.0209188	-0.915594	T
NAB1	0.2804	9.85235	6.38192	0.00125221	0.0209987	-0.922026	T
LOC101750502	0.772599	5.88686	6.38153	0.00125257	0.0209987	-0.922355	T
SNX1	-0.292728	9.67388	-6.37737	0.00125637	0.0210215	-0.925838	T
PLCL2	-0.270007	9.63449	-6.37579	0.00125782	0.0210215	-0.927162	T
PANX1	-0.545342	7.78646	-6.37579	0.00125783	0.0210215	-0.927164	T
C4H4ORF46	-0.334233	9.38615	-6.37331	0.0012601	0.0210377	-0.929239	T
LOC121110359	1.12147	2.92006	6.36762	0.00126534	0.021088	-0.934001	T
ZNF462	-0.476214	8.86308	-6.3667	0.00126619	0.021088	-0.934775	T
ITGB6	1.04309	6.69561	6.3658	0.00126703	0.021088	-0.935529	T
LOC124417970	1.36417	3.04499	6.35925	0.0012731	0.0211673	-0.941022	T
LOC124417848	1.24257	3.45466	6.35108	0.00128074	0.0212724	-0.947887	T
SLA	-0.87961	7.2546	-6.34843	0.00128322	0.0212917	-0.950108	T
MARCKSL1	0.87709	8.48355	6.3466	0.00128494	0.0212955	-0.95165	T
NGLY1	-0.299497	9.41849	-6.34539	0.00128608	0.0212955	-0.952668	T
NSUN6	-0.430538	6.7579	-6.33667	0.00129432	0.02141	-0.960002	T
ARID5A	0.819841	8.46538	6.33264	0.00129815	0.0214513	-0.963391	T
CXCL13L3	3.33725	2.44854	6.32975	0.00130091	0.0214676	-0.965825	T
FAM110A	0.343405	9.36519	6.32876	0.00130185	0.0214676	-0.966658	T
PRC1	-0.319826	10.6414	-6.32643	0.00130408	0.0214676	-0.96862	T
ARHGAP45	-0.366796	11.9696	-6.32371	0.00130669	0.0214676	-0.970917	T
MELTF	0.579279	4.28932	6.32235	0.00130799	0.0214676	-0.972064	T
CASS4	0.330554	8.36332	6.32214	0.00130819	0.0214676	-0.972237	T
TUBA1A	0.291149	11.7403	6.32117	0.00130912	0.0214676	-0.973055	T
MICALL2	0.288769	8.60761	6.3205	0.00130976	0.0214676	-0.973616	T
LOC422276	-0.313971	8.55557	-6.31627	0.00131384	0.0215127	-0.977187	T
TIFA	1.4545	4.35743	6.30625	0.00132356	0.0216279	-0.985644	T
LOC101747613	-0.959451	5.02893	-6.3036	0.00132614	0.0216351	-0.987885	T
CYB5R1	0.341068	9.98399	6.30306	0.00132667	0.0216351	-0.988343	T
POLE	-0.370056	10.6312	-6.29944	0.00133022	0.0216525	-0.991407	T
LOC121110175	1.43468	3.26322	6.29802	0.0013316	0.0216525	-0.992601	T
LOC107050189	1.50511	3.83792	6.29771	0.00133191	0.0216525	-0.992866	T
CDKN2A	-0.296967	11.6777	-6.29631	0.00133329	0.0216525	-0.994054	T
LOC101749531	-0.441458	11.1618	-6.29513	0.00133444	0.0216525	-0.995047	T
TXNDC17	0.351854	9.07613	6.29332	0.00133622	0.0216597	-0.996578	T
ZNF624	-0.390953	8.1589	-6.28772	0.00134175	0.0217275	-1.00132	T
CAMK4	1.22465	4.22397	6.2849	0.00134455	0.0217392	-1.00371	T
MAST3	-0.43255	8.71205	-6.28247	0.00134697	0.0217392	-1.00577	T
EDNRB	-0.484239	9.86585	-6.28246	0.00134698	0.0217392	-1.00578	T
MKX	-0.55541	3.08428	-6.28036	0.00134906	0.0217392	-1.00756	T
NECAB3	-0.274209	8.47447	-6.28022	0.0013492	0.0217392	-1.00767	T
LGI1	-0.536365	1.74149	-6.27585	0.00135356	0.0217819	-1.01138	T
DOK2	-0.570746	9.18922	-6.27487	0.00135455	0.0217819	-1.01221	T
CD74	0.509374	14.104	6.27351	0.00135591	0.0217821	-1.01337	T
DUSP5	0.341784	9.33876	6.2715	0.00135792	0.0217928	-1.01507	T
LOC107049516	0.842855	6.6366	6.2699	0.00135952	0.0217969	-1.01643	T
PAG1	-0.292446	10.3979	-6.26845	0.00136099	0.0217987	-1.01766	T
SNTA1	-0.504101	10.6037	-6.26435	0.00136511	0.021842	-1.02114	T
GK2	0.418005	9.53083	6.26309	0.00136639	0.021842	-1.02221	T
LOC101751974	0.397551	8.0759	6.25235	0.0013773	0.0219942	-1.03134	T
B4GALT1	0.368744	9.50462	6.25104	0.00137864	0.0219942	-1.03245	T
BORCS6	0.385021	9.53483	6.24966	0.00138005	0.021995	-1.03363	T
LOC107055606	-0.777358	4.44201	-6.24518	0.00138464	0.0220367	-1.03744	T
LOC124417721	1.45828	3.59753	6.24445	0.00138539	0.0220367	-1.03807	T
SUSD6	0.327355	11.6715	6.23831	0.00139171	0.0220938	-1.04329	T
RPL22	0.916044	9.31573	6.23445	0.00139571	0.0221354	-1.04658	T
FADS6	1.64946	5.24339	6.23274	0.00139748	0.0221418	-1.04804	T
SMPD4	0.328122	8.71227	6.23085	0.00139945	0.0221513	-1.04965	T
ANXA1	-0.576191	6.62075	-6.21666	0.0014143	0.0223588	-1.06177	T
MCAT	0.409363	10.4623	6.21568	0.00141532	0.0223588	-1.06261	T
LOC107052984	0.430849	12.2195	6.21316	0.00141799	0.0223591	-1.06477	T
TIMELESS	-0.481853	10.5987	-6.21304	0.00141811	0.0223591	-1.06487	T
LOC107054619	1.0815	4.41958	6.20987	0.00142146	0.0223738	-1.06757	T
SLC26A5	0.363538	11.1478	6.20175	0.00143009	0.0224822	-1.07453	T
ENTPD4	0.455365	9.04127	6.19892	0.00143312	0.0224874	-1.07695	T
LOC101748339	0.833473	9.19228	6.19809	0.00143401	0.0224874	-1.07766	T
BHLHE41	-0.611142	6.34151	-6.19753	0.0014346	0.0224874	-1.07814	T
EGLN3	0.30055	9.47294	6.1954	0.00143688	0.0225007	-1.07996	T
RAP1A	0.367853	11.0741	6.19323	0.00143922	0.0225007	-1.08183	T
LOC124417373	0.410796	8.35161	6.19267	0.00143981	0.0225007	-1.0823	T
NSMF	0.628282	7.15552	6.19155	0.00144101	0.0225007	-1.08326	T
SALL1	0.812564	4.77351	6.18887	0.0014439	0.022512	-1.08556	T
TNFRSF10B	0.35175	11.042	6.1882	0.00144462	0.022512	-1.08613	T
CTDSP1	-0.353781	10.4624	-6.18701	0.00144592	0.022512	-1.08716	T
LOC776171	0.427605	11.2858	6.18384	0.00144934	0.0225436	-1.08988	T
LOC101751749	-0.381618	9.22917	-6.17362	0.00146047	0.0226949	-1.09866	T
CTSZ	-0.453209	10.6649	-6.17184	0.00146242	0.0227033	-1.10019	T
SLC40A1	-0.313251	9.43988	-6.16331	0.00147179	0.0228268	-1.10752	T
LOC121108045	2.51334	3.02982	6.16202	0.00147321	0.022827	-1.10863	T
LOC112531487	0.480379	6.09744	6.15921	0.00147632	0.0228352	-1.11105	T
PACSIN3	-0.399954	6.049	-6.15898	0.00147657	0.0228352	-1.11124	T
ATP6V0D2	-0.771691	7.08621	-6.15601	0.00147986	0.0228643	-1.11381	T
MACIR	-0.50547	8.06557	-6.15352	0.00148263	0.0228692	-1.11595	T
TIE1	1.03327	3.28586	6.15318	0.00148301	0.0228692	-1.11624	T
MPZL1	-0.516729	9.5037	-6.14876	0.00148794	0.0229233	-1.12005	T
TBX1	0.6068	8.52253	6.1463	0.00149069	0.0229438	-1.12217	T
ATP6V1A	0.333248	11.4102	6.14276	0.00149466	0.022983	-1.12523	T
LONRF1	0.394711	8.84764	6.13555	0.00150279	0.0230649	-1.13145	T
MTMR6	0.339556	9.16809	6.12337	0.00151662	0.0232544	-1.14198	T
KMT5A	0.398897	8.21804	6.11832	0.00152241	0.0233169	-1.14635	T
SLC5A1	0.855736	4.27396	6.1173	0.00152358	0.0233169	-1.14723	T
TSPEAR	0.28217	8.70521	6.11298	0.00152855	0.0233619	-1.15097	T
GATD3A	-0.31296	9.95977	-6.11192	0.00152978	0.0233619	-1.15189	T
PKD2L1	-0.759242	3.03501	-6.11098	0.00153086	0.0233619	-1.15271	T
SCD5	0.702299	6.94808	6.10913	0.00153299	0.0233724	-1.1543	T
CUTAL	0.976139	3.97104	6.09945	0.00154425	0.0235218	-1.1627	T
LOC121108973	-0.305928	8.28813	-6.09521	0.0015492	0.023575	-1.16638	T
SEC62	0.321854	9.05585	6.09194	0.00155304	0.0235906	-1.16922	T
OSBPL5	-0.354345	7.68698	-6.0909	0.00155426	0.0235906	-1.17013	T
CUL5	-0.292207	9.96422	-6.09061	0.00155461	0.0235906	-1.17038	T
SNRNP25	0.415541	8.19899	6.08225	0.00156447	0.0237181	-1.17764	T
ARHGEF3	0.317213	8.01846	6.08011	0.00156701	0.0237253	-1.1795	T
ZFAND3	0.381409	9.29389	6.07817	0.00156932	0.0237253	-1.18119	T
LOC100857860	-0.84073	1.20286	-6.0769	0.00157082	0.0237253	-1.18229	T
LOC121111357	-0.84073	1.20286	-6.0769	0.00157082	0.0237253	-1.18229	T
DNAL4	0.566991	8.41574	6.07443	0.00157377	0.0237476	-1.18444	T
SLC2A4RG	-0.444599	7.97366	-6.06475	0.00158537	0.0238946	-1.19288	T
HHIPL2	-0.751208	5.45146	-6.06341	0.00158698	0.0238946	-1.19405	T
IGSF3	0.340524	10.7864	6.06143	0.00158938	0.0238946	-1.19578	T
LOC107050229	-0.481976	8.90983	-6.06034	0.00159069	0.0238946	-1.19672	T
THOC7	0.290117	9.62282	6.06016	0.0015909	0.0238946	-1.19688	T
VTCN1L	0.368564	5.45974	6.05731	0.00159436	0.0239243	-1.19937	T
LMNB1	-0.324626	11.2263	-6.05598	0.00159597	0.0239262	-1.20053	T
FAM219B	0.548383	6.58523	6.05359	0.00159887	0.0239475	-1.20261	T
NME5	-0.384075	7.2472	-6.04936	0.00160401	0.0240023	-1.2063	T
SCAF8	-0.289224	10.668	-6.04389	0.0016107	0.0240593	-1.21108	T
LOC426526	0.419298	7.67295	6.04382	0.0016108	0.0240593	-1.21115	T
LOC121111035	0.823831	3.97294	6.03732	0.00161879	0.024134	-1.21683	T
EIF2B3	0.3219	8.65439	6.03596	0.00162047	0.0241368	-1.21802	T
TSPAN14	0.35434	9.44733	6.02782	0.00163056	0.0242535	-1.22515	T
LOC112533522	-0.608667	6.25436	-6.02722	0.00163131	0.0242535	-1.22567	T
TRMT9B	0.877213	4.05375	6.02062	0.00163954	0.0243319	-1.23146	T
LOC121106921	-0.293949	2.07004	-6.02058	0.00163959	0.0243319	-1.23149	T
KBTBD3	0.855525	4.69399	6.01573	0.00164568	0.0243957	-1.23574	T
TMEM189	0.468586	9.9397	6.01329	0.00164875	0.0244006	-1.23788	T
LOC121107459	0.709569	4.61541	6.01075	0.00165195	0.0244256	-1.24011	T
SLC10A7	0.27892	11.4356	6.0062	0.00165771	0.024471	-1.2441	T
SLC4A10	0.287774	7.38398	6.00593	0.00165805	0.024471	-1.24434	T
PRSS12	0.558917	5.50016	6.00263	0.00166224	0.0245104	-1.24724	T
HOXA1	0.358587	7.34574	5.999	0.00166686	0.0245125	-1.25043	T
LOC419888	-1.28978	1.66849	-5.99353	0.00167386	0.024592	-1.25524	T
GAA2	0.36176	12.0688	5.9923	0.00167544	0.0245929	-1.25632	T
MMP17	-0.468026	6.8932	-5.98935	0.00167923	0.0246077	-1.25892	T
RNF19B	0.351312	8.38216	5.98823	0.00168068	0.0246077	-1.25991	T
CXorf21	1.03118	6.08548	5.98549	0.00168421	0.0246077	-1.26232	T
IL10RA	0.529037	5.43521	5.98474	0.00168519	0.0246077	-1.26298	T
LOC101747703	1.53287	4.6341	5.98448	0.00168553	0.0246077	-1.26321	T
LOC107049991	-0.555519	6.35799	-5.98443	0.00168558	0.0246077	-1.26325	T
LOC121106747	1.95613	1.14473	5.98247	0.00168812	0.0246108	-1.26498	T
KCNN1	1.2468	4.35623	5.98191	0.00168884	0.0246108	-1.26547	T
RNF166	0.413362	10.5473	5.97723	0.00169493	0.0246773	-1.2696	T
MCOLN3	0.39245	5.78353	5.97598	0.00169656	0.0246787	-1.2707	T
ABHD12B	-0.366347	8.46565	-5.97342	0.00169989	0.024705	-1.27295	T
FAM35A	-0.420463	9.80417	-5.97134	0.00170261	0.0247194	-1.27479	T
PLXDC1	0.441263	8.46229	5.97032	0.00170394	0.0247194	-1.27569	T
DHFR	-0.345699	8.77547	-5.96801	0.00170698	0.0247223	-1.27773	T
CLC2DL4	0.701027	3.8556	5.96784	0.0017072	0.0247223	-1.27788	T
ANKLE1	-0.363586	9.32666	-5.95783	0.0017204	0.0248911	-1.28673	T
TMEM109	-0.42209	7.40441	-5.95603	0.00172278	0.0249033	-1.28831	T
LOC121107290	-0.378806	8.66609	-5.95194	0.00172821	0.0249347	-1.29193	T
MIER2	0.299097	7.2398	5.95088	0.00172962	0.0249347	-1.29286	T
GUCY2C	1.9802	1.15677	5.94975	0.00173114	0.0249347	-1.29387	T
IQCH	0.662165	6.70428	5.94967	0.00173125	0.0249347	-1.29394	T
RPS6KA2	-0.425936	8.23365	-5.94715	0.0017346	0.0249347	-1.29616	T
MAPK8IP1	-0.638975	5.22808	-5.94697	0.00173485	0.0249347	-1.29633	T
STK31	-0.687344	3.9826	-5.94629	0.00173575	0.0249347	-1.29693	T
EML5	-0.823691	4.88272	-5.94376	0.00173915	0.0249348	-1.29917	T
SLC35B3	0.339765	7.79502	5.94284	0.00174039	0.0249348	-1.29999	T
LOC121111016	-0.844481	4.37007	-5.93862	0.00174606	0.0249538	-1.30372	T
EPGN	-0.548433	7.57909	-5.93787	0.00174708	0.0249538	-1.30439	T
CMPK1	0.358193	11.548	5.9368	0.00174851	0.0249538	-1.30533	T
LOC112531339	0.58201	7.52057	5.93661	0.00174877	0.0249538	-1.3055	T
SDCCAG8	0.34334	8.45627	5.93611	0.00174944	0.0249538	-1.30594	T
LOC112530219	-0.618017	4.02826	-5.93332	0.00175322	0.0249708	-1.30842	T
GTF2H2	0.280802	8.93261	5.93295	0.00175372	0.0249708	-1.30875	T
ROMO1	0.594412	8.38165	5.92855	0.00175969	0.0250337	-1.31265	T
SAMD11	0.342254	6.29373	5.92708	0.00176169	0.0250339	-1.31396	T
DOP1B	0.40801	9.62765	5.92511	0.00176437	0.0250339	-1.3157	T
CDC14A	0.392609	7.77617	5.92406	0.00176581	0.0250339	-1.31663	T
LOC101749148	0.683805	3.98112	5.9235	0.00176658	0.0250339	-1.31714	T
LOC422214	0.537025	9.95219	5.92286	0.00176745	0.0250339	-1.3177	T
LOC107051622	-0.729656	2.85465	-5.91714	0.00177529	0.0251069	-1.32278	T
KIF5C	-0.301953	9.82665	-5.91684	0.00177571	0.0251069	-1.32305	T
PHC1	-0.269926	9.10765	-5.91344	0.00178037	0.0251133	-1.32607	T
NOP56	-0.333388	11.7585	-5.91312	0.00178082	0.0251133	-1.32635	T
SNRNP48	0.477344	6.42664	5.91104	0.00178369	0.0251302	-1.3282	T
SCLY	-0.32468	9.17903	-5.91	0.00178513	0.0251302	-1.32913	T
CRYBB1	-0.630772	8.1535	-5.90746	0.00178864	0.0251578	-1.33139	T
DGAT2	0.35793	9.47902	5.90587	0.00179086	0.025167	-1.33281	T
SLC25A37	0.308054	7.5719	5.90243	0.00179563	0.0252122	-1.33586	T
P3H2	-0.67191	4.39781	-5.89635	0.00180413	0.025267	-1.34128	T
C8orf48	0.866415	5.50449	5.89568	0.00180506	0.025267	-1.34188	T
BTK	-0.306334	9.98063	-5.89516	0.00180579	0.025267	-1.34234	T
CAMK2N2	0.686192	5.47525	5.89365	0.0018079	0.0252747	-1.34368	T
CRIP1	-0.599144	12.2704	-5.89035	0.00181254	0.0253176	-1.34663	T
GALNT11	0.363819	8.82642	5.889	0.00181445	0.0253224	-1.34783	T
HOXA7	-0.306244	9.33576	-5.88378	0.00182182	0.0254033	-1.35249	T
MPP1	-0.276693	10.986	-5.88156	0.00182497	0.0254116	-1.35447	T
LGALSL	-0.333257	6.4476	-5.88115	0.00182556	0.0254116	-1.35484	T
ACBD4	-0.48083	9.60653	-5.87866	0.0018291	0.025439	-1.35706	T
LOC107053353	-0.386348	10.7534	-5.8758	0.00183317	0.0254736	-1.35961	T
EAF2	0.899159	6.62461	5.87382	0.00183599	0.025491	-1.36138	T
MRPS17	0.30557	9.0794	5.87221	0.0018383	0.0255011	-1.36282	T
RARRES1	-0.432718	7.72253	-5.86972	0.00184187	0.0255287	-1.36505	T
CASP10	0.366768	6.29808	5.86787	0.00184452	0.0255435	-1.3667	T
ARL13A	2.18178	2.18421	5.86387	0.00185028	0.0256013	-1.37028	T
DPYSL2	-0.377941	9.86948	-5.86224	0.00185264	0.025612	-1.37174	T
ZIC4	0.326572	5.88456	5.85676	0.00186058	0.0256779	-1.37665	T
FYB1	-0.416044	8.75136	-5.85436	0.00186406	0.0256821	-1.3788	T
TTYH3	-0.437443	9.5329	-5.85281	0.00186632	0.0256822	-1.38019	T
KCNU1	-0.330991	8.66596	-5.85217	0.00186725	0.0256822	-1.38076	T
MARVELD1	0.480339	8.97114	5.85045	0.00186976	0.0256948	-1.3823	T
LOC121113411	0.536236	5.27015	5.84831	0.00187289	0.025716	-1.38422	T
SLC16A9	0.471282	7.13358	5.84644	0.00187561	0.0257255	-1.38589	T
BEST4	2.43145	2.22571	5.84486	0.00187794	0.0257255	-1.38732	T
MSC	0.52251	9.09154	5.84458	0.00187835	0.0257255	-1.38757	T
ZNF385B	-0.634741	6.91508	-5.83985	0.00188531	0.0257771	-1.39181	T
LOC121108764	3.12524	3.90735	5.83528	0.00189205	0.0258474	-1.39591	T
LOC107049095	-0.281506	7.62506	-5.82663	0.00190491	0.0260011	-1.40369	T
DHRS4	-0.274712	9.07599	-5.82144	0.00191268	0.026071	-1.40836	T
MTHFS	-0.392726	5.78362	-5.82105	0.00191326	0.026071	-1.40871	T
LOC121113189	-0.524959	7.07326	-5.81703	0.0019193	0.0261313	-1.41233	T
PITX2	-0.487476	7.53862	-5.81326	0.00192499	0.0261867	-1.41573	T
LOC107057175	-0.660966	5.69035	-5.80909	0.00193129	0.0262503	-1.41948	T
CTSB	-0.424104	11.1756	-5.80343	0.0019399	0.0263371	-1.42458	T
MYBL1	-0.349384	9.2623	-5.80275	0.00194094	0.0263371	-1.4252	T
LOC121111450	0.946116	4.70645	5.79661	0.00195033	0.0264262	-1.43074	T
LOC107055190	-0.55667	3.15685	-5.79595	0.00195134	0.0264262	-1.43133	T
LOC428872	-0.433536	7.78768	-5.79526	0.00195241	0.0264262	-1.43196	T
IL16	0.545179	9.82195	5.79373	0.00195476	0.0264359	-1.43334	T
USP41	-0.299335	11.1233	-5.78905	0.00196196	0.0265111	-1.43756	T
IKZF1	0.269793	9.99185	5.7874	0.00196452	0.0265235	-1.43906	T
TUBGCP5	0.319694	9.26398	5.78491	0.00196838	0.0265297	-1.44131	T
NMI	0.35154	10.5431	5.78379	0.00197011	0.0265297	-1.44232	T
B3GNT5	-0.536849	7.55355	-5.78287	0.00197155	0.0265297	-1.44316	T
CCNK	0.380217	9.64369	5.7798	0.00197632	0.026552	-1.44593	T
FOXC1	0.269622	8.48227	5.77832	0.00197863	0.026552	-1.44727	T
LMF2	-0.313102	13.2016	-5.77794	0.00197922	0.026552	-1.44761	T
TWF2	0.321783	11.1975	5.77758	0.00197977	0.026552	-1.44794	T
SLC29A1	0.270763	11.2805	5.77537	0.00198323	0.0265649	-1.44994	T
C1H3ORF52	0.523069	6.65206	5.77487	0.00198402	0.0265649	-1.4504	T
LOC107050168	-0.670056	5.64088	-5.76368	0.00200161	0.0267648	-1.46053	T
KLHL11	0.337194	10.1269	5.76327	0.00200227	0.0267648	-1.46091	T
LTA4H	-0.270458	12.2008	-5.75904	0.00200896	0.0268241	-1.46474	T
CDCA9	1.47375	2.84291	5.75838	0.00201002	0.0268241	-1.46534	T
SUPT3H	-0.298964	8.7755	-5.75642	0.00201313	0.0268268	-1.46711	T
LOC121107355	0.629973	3.44098	5.75419	0.00201668	0.0268268	-1.46914	T
GNB1L	0.368054	7.59567	5.75418	0.00201671	0.0268268	-1.46915	T
LOC121110477	-1.07726	1.32113	-5.75408	0.00201686	0.0268268	-1.46924	T
TOR1AIP2	0.384067	7.97978	5.75218	0.0020199	0.026845	-1.47097	T
MGMT	-0.284744	10.2665	-5.74671	0.00202866	0.0269316	-1.47593	T
BATF	1.04241	5.02104	5.74604	0.00202974	0.0269316	-1.47655	T
LOC124417160	-0.807161	5.35478	-5.74476	0.0020318	0.0269368	-1.47771	T
LOC121108265	-1.11145	5.93101	-5.73851	0.00204188	0.0270482	-1.48339	T
LOC107054089	-0.771466	5.70065	-5.73402	0.00204916	0.0271224	-1.48748	T
PHPT1L	0.427014	7.85232	5.73185	0.00205269	0.027147	-1.48946	T
MIR1715	-0.542766	5.70799	-5.72648	0.00206146	0.0272184	-1.49435	T
TEX9	-0.437249	7.24087	-5.72517	0.00206361	0.0272245	-1.49554	T
TM4SF1a	1.4904	3.11429	5.72163	0.00206941	0.0272582	-1.49876	T
CPPED1	-0.371091	7.40869	-5.72106	0.00207035	0.0272582	-1.49929	T
MVK	0.489098	9.52591	5.72034	0.00207154	0.0272582	-1.49995	T
LOC121107911	0.791785	6.43657	5.71881	0.00207406	0.0272582	-1.50134	T
RAPGEF4	0.361023	5.6043	5.71848	0.0020746	0.0272582	-1.50164	T
TMEM184B	0.361921	9.98566	5.71622	0.00207833	0.0272729	-1.5037	T
LOC112530880	1.19741	4.64887	5.71576	0.00207909	0.0272729	-1.50412	T
LOC121106534	1.98749	5.10412	5.7135	0.00208283	0.0272997	-1.50618	T
MIS18A	-0.29144	9.00063	-5.70389	0.00209882	0.0274871	-1.51496	T
LOC107054953	-0.733515	4.28973	-5.70155	0.00210273	0.027509	-1.5171	T
RAB39A	-0.523677	6.20311	-5.70085	0.0021039	0.027509	-1.51774	T
CDK19	0.277151	10.2901	5.69552	0.00211287	0.027604	-1.52262	T
FABP7	-0.314837	7.9052	-5.69074	0.00212093	0.0276833	-1.52699	T
RPS27	0.342952	10.8402	5.68858	0.0021246	0.0276833	-1.52897	T
LY6E	-0.321041	11.1718	-5.68787	0.0021258	0.0276833	-1.52962	T
SEPTIN14	0.539665	9.29502	5.6858	0.0021293	0.0277067	-1.53151	T
SESN2	0.489283	8.78804	5.68364	0.00213299	0.0277149	-1.5335	T
RSPH9	0.479357	4.02002	5.68332	0.00213353	0.0277149	-1.53379	T
MNS1	0.516572	6.8115	5.68136	0.00213688	0.0277149	-1.53559	T
EFHD2	-0.280254	9.31581	-5.68046	0.00213841	0.0277149	-1.53641	T
CGN	-0.5089	6.79185	-5.67953	0.00213999	0.0277149	-1.53726	T
SYTL1	-0.291956	9.21372	-5.67933	0.00214035	0.0277149	-1.53745	T
ENTPD2	-0.294076	11.1131	-5.6784	0.00214194	0.0277149	-1.5383	T
NCF4	0.322372	9.56908	5.67522	0.00214738	0.0277409	-1.54122	T
SPATA13	0.375252	8.87405	5.67262	0.00215185	0.0277565	-1.5436	T
DAB2	0.75235	6.39522	5.67252	0.00215203	0.0277565	-1.5437	T
P2RY10	0.412833	8.65617	5.66993	0.00215649	0.0277698	-1.54607	T
CDC45	-0.301045	9.6235	-5.66836	0.0021592	0.0277825	-1.54752	T
IQGAP2	-0.387095	11.1933	-5.66412	0.00216654	0.0278326	-1.55141	T
VCL	0.327576	10.2147	5.65699	0.00217895	0.0279698	-1.55797	T
LRP1	-0.754126	15.3804	-5.65504	0.00218235	0.0279912	-1.55975	T
SLC35A5	0.294403	8.65463	5.64605	0.00219814	0.0281714	-1.56803	T
ACIN1	-0.320565	11.6305	-5.64473	0.00220047	0.0281789	-1.56924	T
LOC112533223	-0.85894	6.10585	-5.63838	0.00221173	0.0283007	-1.5751	T
FAM162A	-0.311069	8.76128	-5.63246	0.00222228	0.0283776	-1.58056	T
GP1BB	-0.560805	4.78021	-5.63117	0.00222458	0.0283776	-1.58175	T
LOC421285	0.866451	5.8127	5.63004	0.0022266	0.0283776	-1.58279	T
SUSD1	0.321002	9.90658	5.62935	0.00222784	0.0283776	-1.58343	T
PRELID3A	0.551293	7.94518	5.62859	0.0022292	0.0283776	-1.58413	T
SYCE2	-0.826331	5.41182	-5.62749	0.00223118	0.0283776	-1.58515	T
AIPL1	-0.734675	4.42473	-5.62715	0.00223178	0.0283776	-1.58546	T
CCDC96	0.903792	3.78119	5.62073	0.00224335	0.0285022	-1.59139	T
ITFG2	0.322374	8.47681	5.61954	0.0022455	0.0285031	-1.59249	T
PSRC1	-0.389676	8.28499	-5.61874	0.00224695	0.0285031	-1.59323	T
SRGAP2	-0.435109	11.744	-5.61717	0.00224979	0.0285167	-1.59468	T
DMTF1	-0.450436	8.94888	-5.61559	0.00225266	0.0285307	-1.59614	T
CATIP	0.913597	5.05753	5.61344	0.00225657	0.0285579	-1.59813	T
LOC100859625	1.16136	4.14999	5.60819	0.00226613	0.0286368	-1.60299	T
TPST2	-0.488464	9.31416	-5.60807	0.00226635	0.0286368	-1.6031	T
RSPO1	0.424363	5.91987	5.60606	0.00227004	0.028661	-1.60497	T
ANKRD27	-0.303982	8.88269	-5.60479	0.00227237	0.0286652	-1.60614	T
ENPP3	1.48195	4.69024	5.60394	0.00227392	0.0286652	-1.60692	T
LIMD1	-0.309856	8.51418	-5.59979	0.00228156	0.0287369	-1.61077	T
UGCG	0.437406	7.20075	5.59892	0.00228316	0.0287369	-1.61158	T
PLA2G15	-0.317366	8.24367	-5.59713	0.00228646	0.0287495	-1.61324	T
CFI	0.805816	5.26934	5.59569	0.00228911	0.0287495	-1.61457	T
GABBR2	0.817897	2.53936	5.59549	0.0022895	0.0287495	-1.61476	T
LARP4	0.270083	11.1544	5.58561	0.00230786	0.0289008	-1.62393	T
DNALI1	0.591714	4.78276	5.58516	0.0023087	0.0289008	-1.62434	T
PNRC1	0.411873	10.0923	5.57863	0.00232094	0.0290315	-1.63041	T
ERMARD	-0.553397	7.97451	-5.5721	0.00233325	0.0291201	-1.63648	T
ASAP3	-0.33135	7.37344	-5.5718	0.00233382	0.0291201	-1.63676	T
KIAA1614	-0.303726	8.97709	-5.57164	0.00233411	0.0291201	-1.63691	T
PRKAG2	0.395887	9.79158	5.57105	0.00233523	0.0291201	-1.63745	T
NDEL1	0.299709	8.21941	5.56831	0.00234043	0.0291257	-1.64001	T
SLC17A9	0.303252	9.57149	5.56796	0.00234108	0.0291257	-1.64033	T
PGAM1	-0.280037	14.8235	-5.56227	0.00235193	0.0292067	-1.64563	T
LOC112532879	0.657237	5.69736	5.56215	0.00235215	0.0292067	-1.64574	T
WBP2	0.308894	8.06357	5.5617	0.00235302	0.0292067	-1.64616	T
EPB41L1	-0.320383	10.8618	-5.55932	0.00235756	0.0292406	-1.64838	T
HUNK	0.50333	6.10289	5.558	0.00236009	0.0292495	-1.64961	T
DMC1	1.03731	3.47784	5.55485	0.00236614	0.029288	-1.65255	T
NRBP1	0.312872	10.1711	5.5545	0.00236681	0.029288	-1.65287	T
FRMD6	0.327165	7.91162	5.55155	0.0023725	0.0293359	-1.65563	T
ZNF395	-0.280246	8.003	-5.54482	0.00238551	0.0294517	-1.6619	T
SLCO4A1	0.263706	11.1619	5.54191	0.00239117	0.0294581	-1.66462	T
NECAP2	0.420417	11.8352	5.54174	0.0023915	0.0294581	-1.66477	T
GPR37L1	1.83386	2.69008	5.53942	0.00239603	0.0294915	-1.66695	T
NFKBIB	0.463245	10.4634	5.53634	0.00240205	0.029543	-1.66983	T
CRY2	0.405946	9.32982	5.53296	0.00240867	0.0296019	-1.67298	T
PDE4D	-0.415036	7.02099	-5.53043	0.00241365	0.0296395	-1.67535	T
C2CD4C	2.44893	1.85446	5.52825	0.00241793	0.0296395	-1.67738	T
TFPI	-0.55248	6.02489	-5.528	0.00241843	0.0296395	-1.67763	T
P2RY6	-0.808548	9.19847	-5.52765	0.00241912	0.0296395	-1.67795	T
TPPP	1.64019	4.60328	5.52675	0.0024209	0.0296395	-1.67879	T
AvBD8	1.65728	3.77316	5.52474	0.00242486	0.0296435	-1.68067	T
MANBA	-0.364329	8.98146	-5.52408	0.00242618	0.0296435	-1.68129	T
PYGL	-0.271072	10.8834	-5.5238	0.00242673	0.0296435	-1.68155	T
GAS8	-0.321252	7.49088	-5.51893	0.0024364	0.0297218	-1.68612	T
LOC112531126	1.57054	4.42057	5.51872	0.00243681	0.0297218	-1.68631	T
CDK8	0.315991	10.6159	5.51547	0.00244328	0.0297511	-1.68935	T
PRPH2L	0.592979	5.59514	5.50549	0.00246329	0.0299318	-1.69871	T
LYRM1	0.297184	8.60072	5.50076	0.00247285	0.0300236	-1.70316	T
CLCF1	1.15065	2.04863	5.49907	0.00247629	0.0300236	-1.70475	T
SNX29	-0.436324	8.68141	-5.499	0.00247642	0.0300236	-1.70481	T
LOC121108004	0.68876	5.92689	5.49083	0.00249305	0.0301561	-1.71249	T
TRRAP	-0.264746	12.2925	-5.49059	0.00249354	0.0301561	-1.71271	T
KRT10	-0.747717	6.61144	-5.4886	0.00249761	0.0301561	-1.71458	T
FGD6	0.347885	10.4827	5.48741	0.00250006	0.0301561	-1.71571	T
SSH2	-0.273889	10.3105	-5.48726	0.00250036	0.0301561	-1.71585	T
NCAPH2	-0.309927	10.3096	-5.48632	0.00250228	0.0301561	-1.71673	T
CAMK2G	0.323872	11.3654	5.48448	0.00250606	0.0301791	-1.71846	T
RECQL5	0.266641	9.49859	5.48157	0.00251205	0.0301987	-1.7212	T
GPR141	-0.728736	7.04893	-5.48046	0.00251435	0.0301987	-1.72225	T
SPP1	-0.413961	7.69646	-5.48007	0.00251516	0.0301987	-1.72262	T
CSF1R	-0.897511	11.6093	-5.47905	0.00251726	0.0302015	-1.72357	T
NDC80	-0.298688	10.2438	-5.47627	0.00252302	0.0302481	-1.7262	T
TBC1D8	0.341217	9.27659	5.47183	0.00253223	0.0303361	-1.73038	T
LOC121111169	0.386693	3.41283	5.47087	0.00253423	0.0303375	-1.73128	T
FSHR	-0.461854	7.76043	-5.46652	0.0025433	0.0304236	-1.73538	T
LOC107054058	0.86162	2.74419	5.45926	0.00255855	0.0305834	-1.74224	T
WDR54	0.35689	9.1026	5.45733	0.00256263	0.0305967	-1.74407	T
KANK4	-0.343594	9.34882	-5.45638	0.00256463	0.0305967	-1.74496	T
GOLIM4	-0.320737	12.1991	-5.45511	0.00256732	0.0305967	-1.74616	T
CCDC57	0.781182	5.66164	5.45456	0.00256847	0.0305967	-1.74668	T
RIPK3	0.773422	7.98479	5.45223	0.00257341	0.0305967	-1.74888	T
ATG4B	-0.304904	8.59575	-5.45153	0.00257489	0.0305967	-1.74954	T
PRPS2	0.318399	7.99303	5.45103	0.00257595	0.0305967	-1.75001	T
LOC101752086	0.364169	4.33157	5.45093	0.00257616	0.0305967	-1.75011	T
CBY1	0.372246	8.90897	5.45068	0.0025767	0.0305967	-1.75035	T
LOC770574	1.20372	3.01161	5.4417	0.00259585	0.0307786	-1.75884	T
LHFPL4	-0.408577	5.14414	-5.44091	0.00259755	0.0307786	-1.75959	T
LOC107053937	0.67901	4.93744	5.44082	0.00259773	0.0307786	-1.75967	T
INTS10	0.281384	8.81535	5.43819	0.00260339	0.030823	-1.76217	T
MADCAM1	1.00176	3.46674	5.43557	0.00260902	0.030867	-1.76465	T
ACAT2	0.325436	9.29932	5.43398	0.00261244	0.0308849	-1.76615	T
ARHGEF37	-0.750807	5.73748	-5.43058	0.0026198	0.0309493	-1.76938	T
LOC112530674	-0.319972	10.7408	-5.42907	0.00262306	0.0309651	-1.7708	T
PPIP5K2	-0.327176	10.0823	-5.42765	0.00262615	0.030979	-1.77215	T
JUND	0.346783	11.5886	5.42536	0.00263112	0.031015	-1.77432	T
LOC124417723	-0.512935	4.3078	-5.42238	0.00263762	0.0310689	-1.77715	T
ARHGAP33L2	0.699406	5.12457	5.41868	0.00264571	0.0311415	-1.78066	T
HAAO	-0.548316	5.67904	-5.41765	0.00264796	0.0311453	-1.78164	T
GMNN	-0.314812	8.31402	-5.41627	0.002651	0.0311584	-1.78296	T
LOC430746	0.598229	7.76469	5.41063	0.00266342	0.0312524	-1.78832	T
CFAP70	-0.742441	6.00512	-5.40905	0.00266691	0.0312524	-1.78982	T
CXorf57	-0.333111	12.14	-5.40812	0.00266896	0.0312524	-1.7907	T
TRAPPC4	0.305377	8.97476	5.40738	0.0026706	0.0312524	-1.7914	T
BHLHE23	-0.419346	9.55244	-5.40315	0.00267999	0.0313118	-1.79543	T
NPAS2	-0.567762	6.6238	-5.40247	0.00268149	0.0313118	-1.79607	T
TNFSF13B	-0.34235	5.88714	-5.39443	0.00269946	0.0314876	-1.80373	T
LOC121113257	-0.422346	5.96838	-5.39399	0.00270044	0.0314876	-1.80415	T
SCMH1	-0.291161	7.98651	-5.38751	0.00271502	0.031612	-1.81033	T
EXOC7	0.367945	9.86936	5.3851	0.00272046	0.0316525	-1.81262	T
RGS3	0.459568	8.28007	5.3815	0.00272862	0.0316739	-1.81605	T
ATP10D	-0.370265	8.46172	-5.38105	0.00272965	0.0316739	-1.81649	T
PLCG2	-0.31017	9.76161	-5.38083	0.00273014	0.0316739	-1.81669	T
PROM1	-0.35897	8.54488	-5.3787	0.00273498	0.0316808	-1.81873	T
LEXM	1.63953	0.986432	5.37799	0.00273661	0.0316808	-1.81941	T
BZFP1	0.323507	7.47258	5.37236	0.00274947	0.0317858	-1.82478	T
B4GALNT3	-1.06919	5.13334	-5.3723	0.00274961	0.0317858	-1.82484	T
IPCEF1	-0.559143	8.05465	-5.36959	0.00275582	0.0318348	-1.82743	T
COL13A1	0.891869	6.46136	5.36719	0.00276135	0.0318641	-1.82973	T
STX8	0.318179	9.42887	5.36677	0.0027623	0.0318641	-1.83013	T
PTCHD3	0.565653	8.63912	5.36395	0.00276881	0.0318832	-1.83282	T
SNTB1	0.301516	9.92158	5.36349	0.00276988	0.0318832	-1.83327	T
IPMK	-0.339772	10.2701	-5.35584	0.00278763	0.0320419	-1.84059	T
LOC107054160	0.402298	5.89536	5.35465	0.00279038	0.0320507	-1.84172	T
GNB4	0.287605	11.2256	5.3532	0.00279378	0.0320536	-1.84312	T
CXCR1	-0.344216	7.51668	-5.35285	0.0027946	0.0320536	-1.84346	T
UPRT	0.316455	10.1861	5.35199	0.00279659	0.0320537	-1.84427	T
ATP1B1	-0.285371	9.66223	-5.35012	0.00280097	0.0320812	-1.84607	T
PSD3	-0.480839	13.2693	-5.34629	0.00280996	0.0321613	-1.84974	T
MCUB	-0.367111	8.78607	-5.34159	0.00282103	0.0322636	-1.85425	T
LOC124418069	-0.451454	6.66652	-5.3408	0.00282289	0.0322636	-1.85501	T
KCNQ2	-0.739379	4.61135	-5.33843	0.00282851	0.0323049	-1.85728	T
LOC121111657	0.83534	6.83788	5.33729	0.00283119	0.0323128	-1.85837	T
LOC124416955	0.528367	8.09922	5.33463	0.0028375	0.0323619	-1.86093	T
KNL1	-0.481109	10.5081	-5.33286	0.00284172	0.0323872	-1.86263	T
ZBTB6	-0.368171	7.88693	-5.32978	0.00284907	0.0324252	-1.86559	T
DHRS3	-0.318913	7.04332	-5.32393	0.00286306	0.0325386	-1.87121	T
SGPP1	0.404534	10.0492	5.32216	0.00286733	0.0325561	-1.87292	T
DNAJC27	-0.334625	8.87375	-5.31727	0.0028791	0.0326521	-1.87762	T
LRRC47	-0.289683	9.90566	-5.31578	0.00288272	0.0326701	-1.87905	T
WDR90	-0.307349	9.57812	-5.30947	0.00289805	0.0327978	-1.88513	T
KCNMB1	0.430249	6.48476	5.30267	0.00291466	0.0329508	-1.89169	T
TLR4	0.278028	9.59797	5.3012	0.00291828	0.0329508	-1.89311	T
CCDC77	-0.298881	8.43219	-5.30119	0.0029183	0.0329508	-1.89312	T
KCNQ5	1.39089	4.99903	5.30061	0.00291972	0.0329508	-1.89368	T
GBP1	-0.313243	10.8143	-5.29914	0.00292332	0.0329685	-1.89509	T
PDGFRB	-0.799815	6.70343	-5.29687	0.00292893	0.0330086	-1.89729	T
LOC121108020	1.51675	3.83859	5.29557	0.00293214	0.0330193	-1.89854	T
AACS	0.33845	10.6647	5.29483	0.00293396	0.0330193	-1.89925	T
ARID2	0.319826	9.63524	5.29218	0.00294051	0.0330699	-1.90181	T
LOC121111234	0.743753	5.37234	5.29064	0.00294433	0.0330899	-1.9033	T
SLC4A2	-0.322924	11.7482	-5.28894	0.00294855	0.0331143	-1.90494	T
CTTNBP2	-0.494984	7.48231	-5.2862	0.00295537	0.0331679	-1.90759	T
TRPM2	0.482381	11.0693	5.28499	0.00295839	0.0331787	-1.90876	T
LOC121107292	-0.762146	6.69335	-5.28341	0.00296233	0.0331999	-1.91029	T
CPNE4	0.362367	6.78729	5.2823	0.0029651	0.0332079	-1.91136	T
SLC7A11	0.309934	7.88701	5.27995	0.002971	0.0332464	-1.91364	T
AR	-0.536011	8.6839	-5.27637	0.00297999	0.0332853	-1.9171	T
FCER1G	0.57655	7.9111	5.27463	0.00298437	0.0332853	-1.91879	T
AATK	0.347114	9.29944	5.27252	0.0029897	0.033295	-1.92083	T
LOC121107590	2.08776	1.67387	5.27098	0.00299358	0.033295	-1.92232	T
WNT5B	1.07588	6.29017	5.2705	0.0029948	0.033295	-1.92279	T
ESRRG	0.5463	5.88195	5.2702	0.00299554	0.033295	-1.92307	T
RSAD1	-0.466741	8.32148	-5.26524	0.00300813	0.0334035	-1.92788	T
NFKB2	0.380612	12.4264	5.26075	0.00301958	0.0334931	-1.93223	T
WDR88	-0.990719	2.26851	-5.25858	0.00302515	0.0335088	-1.93434	T
ITPR3	-0.311196	8.51805	-5.25636	0.00303084	0.0335489	-1.9365	T
TPST1	0.339031	10.5135	5.25374	0.00303755	0.0335542	-1.93904	T
LOC771388	-0.401171	7.30579	-5.24393	0.00306292	0.0337619	-1.94857	T
BEND6	0.421005	7.53513	5.24249	0.00306666	0.0337619	-1.94997	T
CX3CL1	2.48528	2.25262	5.24234	0.00306705	0.0337619	-1.95011	T
LOC112531880	-0.323624	10.5858	-5.24181	0.00306843	0.0337619	-1.95063	T
LOC112529996	0.880637	3.52811	5.24164	0.00306888	0.0337619	-1.9508	T
KCTD20	-0.28047	10.1225	-5.23883	0.00307621	0.0338195	-1.95353	T
ANKRD10	-0.382794	8.618	-5.23567	0.00308448	0.0338643	-1.95661	T
PITPNA	-0.272129	10.8048	-5.23277	0.00309207	0.0339246	-1.95943	T
CEP83	-0.401581	8.44981	-5.23029	0.00309859	0.0339657	-1.96184	T
FNIP2	-0.372662	7.66615	-5.22725	0.0031066	0.0339855	-1.9648	T
DHRS7	-0.408196	10.0966	-5.22694	0.00310744	0.0339855	-1.96511	T
LOC124418109	1.12529	4.50302	5.22588	0.00311024	0.0339855	-1.96614	T
SNX24	0.359967	8.22772	5.22393	0.0031154	0.0340189	-1.96804	T
STN1	0.527565	7.45922	5.21676	0.00313447	0.034204	-1.97504	T
ARRDC4	0.378458	8.28191	5.21596	0.0031366	0.0342042	-1.97582	T
ARHGAP33	-0.380809	9.0006	-5.21512	0.00313885	0.0342056	-1.97664	T
TRAF1	0.997202	7.68893	5.20683	0.0031611	0.0343555	-1.98473	T
STAG3	0.308453	10.4674	5.20533	0.00316514	0.0343762	-1.9862	T
PTGES	0.826972	2.60613	5.20076	0.00317751	0.0344481	-1.99067	T
PLXNA2	-0.430685	8.36783	-5.20057	0.00317803	0.0344481	-1.99086	T
LOC124417340	0.567882	3.35229	5.19918	0.00318178	0.0344481	-1.99221	T
TRMT2B	0.363367	7.02244	5.19888	0.0031826	0.0344481	-1.9925	T
LY86	-0.333514	14.3303	-5.19774	0.0031857	0.0344481	-1.99362	T
LOC124417344	-0.596267	5.93292	-5.19752	0.00318631	0.0344481	-1.99384	T
HMCN1	-0.357969	8.37065	-5.19672	0.00318849	0.0344481	-1.99462	T
MYORG	-0.556933	7.02124	-5.19609	0.0031902	0.0344481	-1.99524	T
TLN1	-0.292649	13.3192	-5.19582	0.00319094	0.0344481	-1.9955	T
FAM102B	0.319148	10.5282	5.19084	0.00320454	0.0345496	-2.00038	T
LOC107052000	-0.424749	6.83261	-5.19081	0.00320462	0.0345496	-2.0004	T
ATP2A3	-0.287212	11.2724	-5.18975	0.00320752	0.0345577	-2.00144	T
ORMDL2	0.320861	8.33903	5.18664	0.00321606	0.0345577	-2.00449	T
HECTD2	0.44995	9.11046	5.18554	0.00321909	0.0345672	-2.00557	T
PHF2	0.418061	6.86205	5.18472	0.00322133	0.0345683	-2.00636	T
TRIM59	-0.285621	11.2005	-5.18247	0.00322755	0.0345892	-2.00858	T
SCPEP1	-0.26387	10.362	-5.17837	0.00323889	0.0346321	-2.0126	T
IRF1	0.579338	8.50216	5.17774	0.00324063	0.0346321	-2.01321	T
EPHA2	0.695453	8.46601	5.17761	0.003241	0.0346321	-2.01334	T
LOC112531567	0.902157	4.54224	5.17715	0.00324227	0.0346321	-2.01379	T
CPLX2	-0.351933	6.948	-5.17552	0.0032468	0.0346385	-2.01539	T
ABCC5	0.303637	11.0276	5.17539	0.00324716	0.0346385	-2.01552	T
NCOA4	-0.44259	11.0369	-5.17242	0.00325543	0.0347038	-2.01843	T
LOC107049673	-0.733289	5.49049	-5.16955	0.00326345	0.0347512	-2.02125	T
NRG4	0.571556	7.06993	5.16891	0.00326525	0.0347512	-2.02188	T
C1orf101	-0.841657	6.34854	-5.16852	0.00326633	0.0347512	-2.02226	T
LOC101747507	0.56979	5.87109	5.16631	0.00327253	0.0347944	-2.02444	T
PSD	0.431647	8.24935	5.16289	0.00328214	0.0348506	-2.02779	T
LOC418667	-0.9347	5.84724	-5.16096	0.00328758	0.0348855	-2.02969	T
LOC424491	0.288557	6.60701	5.1553	0.0033036	0.035026	-2.03526	T
MIS18BP1	-0.299668	10.1167	-5.15475	0.00330516	0.035026	-2.0358	T
LOC418170	-0.300521	8.01664	-5.15346	0.00330882	0.0350418	-2.03707	T
QPCT	-0.396462	10.812	-5.15252	0.0033115	0.0350473	-2.038	T
LOC112533010	0.3812	6.08493	5.15001	0.00331865	0.0350999	-2.04047	T
PAPSS2	-0.381682	7.06918	-5.14552	0.00333148	0.0351963	-2.04489	T
LOC124417814	-0.581195	5.2325	-5.14377	0.00333649	0.0351963	-2.04661	T
CACNB4	0.484168	8.56641	5.14274	0.00333944	0.0351963	-2.04763	T
LINGO1	-0.555405	6.86091	-5.14213	0.0033412	0.0351963	-2.04823	T
ATXN10	-0.419575	8.33889	-5.14069	0.00334535	0.0351963	-2.04965	T
PAF1	-0.358414	10.2207	-5.14047	0.00334598	0.0351963	-2.04987	T
LMLN	0.377988	7.63105	5.14001	0.0033473	0.0351963	-2.05032	T
NHSL2	-0.354854	11.0752	-5.13988	0.00334766	0.0351963	-2.05045	T
LOC421125	-0.416443	6.67076	-5.13949	0.00334879	0.0351963	-2.05083	T
ZBTB7B	0.492858	8.83729	5.12426	0.00339304	0.035584	-2.06587	T
LOC417192	0.831601	5.79536	5.12157	0.00340092	0.0356204	-2.06853	T
KIF11	-0.326557	12.0621	-5.11973	0.00340632	0.0356349	-2.07035	T
ST3GAL3	-1.02043	2.28337	-5.11921	0.00340785	0.0356349	-2.07086	T
MGME1	-0.356497	8.22003	-5.11842	0.00341017	0.0356349	-2.07164	T
TGM6	0.297976	7.231	5.1159	0.00341759	0.0356731	-2.07413	T
LOC101751253	0.927622	4.9589	5.11499	0.00342029	0.0356731	-2.07503	T
RAB3B	-0.295289	6.8214	-5.1089	0.00343835	0.0357975	-2.08107	T
VIPR1	-0.423612	8.27635	-5.10886	0.00343847	0.0357975	-2.08111	T
TMEM50B	0.319624	9.65464	5.10835	0.00343998	0.0357975	-2.08161	T
SESN1	-0.266645	10.4846	-5.10567	0.00344796	0.0358574	-2.08426	T
LOC100859149	0.549985	5.60875	5.09706	0.00347373	0.0361022	-2.0928	T
DCAF15	-0.291482	9.57203	-5.09486	0.00348035	0.0361047	-2.09497	T
LOC107049862	-0.407625	10.3267	-5.09422	0.00348228	0.0361047	-2.09561	T
MFSD12	0.293231	9.96158	5.09402	0.0034829	0.0361047	-2.09582	T
CAMK1D	-0.323537	8.75881	-5.09215	0.00348853	0.0361398	-2.09766	T
PARVG	-0.423838	9.26349	-5.09075	0.00349278	0.0361564	-2.09906	T
LOC112532582	-0.645924	4.23529	-5.08797	0.00350119	0.0361564	-2.10181	T
ACVR2B	0.670904	5.86394	5.08588	0.00350756	0.0361564	-2.1039	T
ARHGEF11	-0.272494	10.7614	-5.08578	0.00350786	0.0361564	-2.10399	T
NOCT	-0.316706	10.0857	-5.0857	0.00350809	0.0361564	-2.10407	T
COL6A3	-0.348843	10.7737	-5.08499	0.00351026	0.0361564	-2.10478	T
TMCO6	-0.266421	9.43508	-5.08276	0.00351705	0.0362032	-2.10699	T
GATC	-0.322703	7.86939	-5.07882	0.00352911	0.0363042	-2.11091	T
HIST1H3H	-1.20706	0.869779	-5.07653	0.00353611	0.03633	-2.11318	T
LOC107053603	-1.20706	0.869779	-5.07653	0.00353611	0.03633	-2.11318	T
ZFYVE1	-0.313423	8.57967	-5.07544	0.00353949	0.0363416	-2.11428	T
GPRC5B	0.642906	5.43761	5.07362	0.00354509	0.036376	-2.11609	T
ADAMTS7	1.09962	4.98777	5.07266	0.00354803	0.0363831	-2.11704	T
RNF43	0.504319	7.46865	5.06962	0.00355741	0.0364099	-2.12006	T
GM2A	-0.679027	4.09548	-5.06675	0.00356631	0.0364548	-2.12292	T
LOC107049245	-0.785059	6.06762	-5.06135	0.00358309	0.0365594	-2.1283	T
MTAP	-0.458406	8.41016	-5.06128	0.00358333	0.0365594	-2.12837	T
HIVEP2	0.744981	9.69102	5.05843	0.0035922	0.0366268	-2.13121	T
BORCS8	0.273996	6.39413	5.0577	0.00359449	0.0366271	-2.13194	T
KLF4	-0.613838	9.36149	-5.05338	0.00360805	0.036742	-2.13625	T
F5	-0.670747	10.8108	-5.05118	0.00361497	0.0367718	-2.13845	T
SLC16A3	0.324262	11.3974	5.05101	0.00361552	0.0367718	-2.13862	T
SYTL2	-0.58787	5.27751	-5.04871	0.00362276	0.0367961	-2.14091	T
SULT1B	0.304325	8.48785	5.04794	0.00362519	0.0367961	-2.14168	T
LOC121113436	0.503013	8.51297	5.0463	0.00363037	0.0367961	-2.14331	T
WIPF2	0.371149	8.64825	5.04603	0.00363123	0.0367961	-2.14359	T
GPAT3	0.293726	9.86171	5.04242	0.0036427	0.0368858	-2.1472	T
PLAC8L1	-0.778908	2.1626	-5.03669	0.00366095	0.0369016	-2.15292	T
GSE1	0.352811	8.7119	5.03656	0.00366136	0.0369016	-2.15305	T
COLQ	1.08179	0.707561	5.0362	0.00366253	0.0369016	-2.15341	T
KLB	1.08179	0.707561	5.0362	0.00366253	0.0369016	-2.15341	T
LOC101751348	1.08179	0.707561	5.0362	0.00366253	0.0369016	-2.15341	T
LOC107053318	1.08179	0.707561	5.0362	0.00366253	0.0369016	-2.15341	T
LOC124417767	1.08179	0.707561	5.0362	0.00366253	0.0369016	-2.15341	T
GNLY	1.11215	3.73534	5.02777	0.0036896	0.0371004	-2.16184	T
SLC10A4	-0.288823	9.67286	-5.0272	0.00369144	0.0371004	-2.16242	T
CCDC91	-0.36478	6.52479	-5.02568	0.00369636	0.0371267	-2.16394	T
P2RX4	0.726169	8.26041	5.02275	0.00370584	0.0371757	-2.16688	T
TMEM80	0.332961	8.00921	5.02164	0.00370943	0.0371887	-2.16798	T
ANKRD13C	0.275421	10.3868	5.01807	0.00372106	0.0372821	-2.17157	T
LOC101752332	-0.537585	6.17854	-5.01695	0.0037247	0.0372955	-2.17269	T
TPMT	0.266308	8.37033	5.01192	0.00374114	0.0374149	-2.17773	T
HHIP	1.15825	2.05243	5.01133	0.00374309	0.0374149	-2.17833	T
ACSBG1	1.40595	3.01636	5.01047	0.00374589	0.0374149	-2.17918	T
RFXAP	-0.274595	10.6825	-5.00959	0.00374881	0.0374209	-2.18007	T
SLC22A16	-0.73226	2.67951	-5.00706	0.00375711	0.0374806	-2.18261	T
SCUBE1	0.307855	7.00039	5.00376	0.00376801	0.0375662	-2.18592	T
CD180	-0.679467	7.7486	-5.00014	0.00377999	0.0376624	-2.18956	T
ARFGEF3	-0.506781	10.6221	-4.99873	0.00378467	0.0376626	-2.19098	T
JUN	0.422368	9.70069	4.99774	0.00378796	0.037663	-2.19197	T
LOC417937	0.448588	7.52437	4.99732	0.00378937	0.037663	-2.1924	T
EGR1	0.429052	9.24598	4.99622	0.00379305	0.0376764	-2.19351	T
SCN9A	-0.624155	5.81508	-4.99256	0.00380525	0.0377743	-2.19718	T
C2	-0.26424	6.36922	-4.98589	0.00382763	0.0379495	-2.2039	T
SMC3	-0.43023	11.2939	-4.9852	0.00382994	0.0379495	-2.20459	T
ANGEL1	0.314998	10.4151	4.98413	0.00383357	0.0379622	-2.20568	T
LOC121107965	0.8787	6.85705	4.98199	0.00384079	0.0379871	-2.20783	T
PSMA3	-0.3151	10.8305	-4.97822	0.00385355	0.0380668	-2.21163	T
TES	-0.311997	9.10777	-4.97023	0.00388079	0.0383124	-2.21969	T
SCN2B	-0.512903	4.47618	-4.95316	0.00393969	0.0387636	-2.23693	T
LOC124417147	1.21748	2.71478	4.95282	0.00394089	0.0387636	-2.23728	T
AOPEP	-0.348663	7.05581	-4.9511	0.00394686	0.0387926	-2.23901	T
ATP5PB	0.274042	11.9314	4.95059	0.00394863	0.0387926	-2.23953	T
LOC425462	-0.376905	8.7991	-4.94976	0.00395155	0.0387977	-2.24037	T
GAA	-0.30572	9.68667	-4.94871	0.0039552	0.03881	-2.24143	T
MMRN2	2.24915	2.13456	4.94126	0.00398137	0.0389721	-2.24898	T
SLC2A14	0.318923	11.4159	4.94002	0.00398576	0.0389914	-2.25024	T
CTSV	0.266637	9.15996	4.93831	0.00399178	0.0390176	-2.25197	T
LOC121108010	1.85659	4.3552	4.9371	0.00399605	0.0390176	-2.25319	T
LOC121108643	-0.818075	5.60764	-4.93658	0.00399791	0.0390176	-2.25372	T
C4BPG	0.330041	9.16622	4.93346	0.00400898	0.0390876	-2.25689	T
AP2M1	-0.287688	12.0251	-4.93285	0.00401113	0.0390876	-2.2575	T
LOC121107816	0.610288	4.98047	4.93113	0.00401727	0.0390945	-2.25925	T
WWP1	-0.406244	8.47067	-4.9309	0.00401807	0.0390945	-2.25948	T
INA	1.60639	5.82987	4.92946	0.00402321	0.039121	-2.26094	T
LOC121109310	0.870864	3.66486	4.92625	0.00403468	0.039194	-2.2642	T
LOC101750628	0.415683	4.2728	4.926	0.00403557	0.039194	-2.26445	T
KIAA1191	0.422698	8.73293	4.92478	0.00403993	0.0392128	-2.26569	T
SETD9	0.277414	8.6818	4.92251	0.0040481	0.039245	-2.268	T
LOC112531855	-0.467111	4.80476	-4.92075	0.00405442	0.0392598	-2.26979	T
PRLHR	-0.633298	6.6478	-4.91889	0.00406114	0.0392738	-2.27168	T
PPP1R13B	-0.272604	9.5512	-4.9186	0.00406219	0.0392738	-2.27198	T
TSNAXIP1	-0.506498	3.34605	-4.91831	0.00406322	0.0392738	-2.27227	T
RUNX1	0.263845	12.945	4.91399	0.00407884	0.0393776	-2.27666	T
CD300LG	-0.286428	8.24027	-4.91295	0.0040826	0.0393904	-2.27771	T
IGBP1	0.295399	9.39753	4.90887	0.00409746	0.0395102	-2.28187	T
SELENOI	0.367494	9.92735	4.9068	0.00410501	0.0395477	-2.28398	T
LOC124418343	1.19294	5.30926	4.90646	0.00410624	0.0395477	-2.28432	T
IFIH1	-0.347935	9.21363	-4.90495	0.00411174	0.0395685	-2.28585	T
OSBPL8	-0.311182	12.2218	-4.90453	0.00411331	0.0395685	-2.28629	T
LOC101749129	0.804506	3.27509	4.9032	0.00411818	0.0395918	-2.28764	T
KBTBD8	-0.366508	9.0268	-4.90229	0.00412152	0.0396004	-2.28857	T
LOC101750283	-0.667175	6.6871	-4.9008	0.00412699	0.0396126	-2.29009	T
FNDC5	0.848465	5.8975	4.8993	0.00413251	0.0396126	-2.29162	T
ZC3H12C	0.521793	7.61723	4.89927	0.0041326	0.0396126	-2.29164	T
GPS2	-0.265213	8.17975	-4.8952	0.00414762	0.0397287	-2.29579	T
LOC107050073	-1.0374	5.89609	-4.88544	0.00418387	0.0400092	-2.30575	T
TYSND1	-0.391027	8.83151	-4.8838	0.00418998	0.0400439	-2.30742	T
LOC124417186	2.03041	1.56186	4.88161	0.0041982	0.0400717	-2.30966	T
FGD4	-0.408549	8.70287	-4.88139	0.00419901	0.0400717	-2.30988	T
TCN2	-0.294	8.54162	-4.88054	0.00420221	0.0400717	-2.31075	T
LRRK1	-0.435071	9.15386	-4.87972	0.00420528	0.0400717	-2.31159	T
PRODH	0.650538	6.43016	4.87898	0.00420805	0.0400745	-2.31234	T
CRMP1	-0.282805	7.72647	-4.87296	0.00423077	0.0402434	-2.3185	T
ADAR	-0.293005	10.6213	-4.87115	0.00423759	0.0402636	-2.32035	T
LOC107053964	-0.627301	2.7081	-4.87108	0.00423788	0.0402636	-2.32042	T
ANXA5	-0.330072	10.4497	-4.86977	0.00424285	0.0402872	-2.32177	T
LIN7C	0.294085	9.37228	4.86331	0.00426742	0.0404591	-2.32837	T
HTATIP2	-0.541367	9.08456	-4.86304	0.00426847	0.0404591	-2.32865	T
ALK	-0.491955	5.83097	-4.8603	0.00427896	0.0405348	-2.33146	T
LOC121111015	-0.441027	5.90166	-4.85745	0.00428987	0.0405906	-2.33437	T
LOC124417568	0.291967	10.0812	4.85707	0.00429134	0.0405906	-2.33477	T
OLIG2	-0.345362	5.2111	-4.8568	0.00429239	0.0405906	-2.33505	T
MIEN1	0.37449	8.88041	4.85373	0.0043042	0.040651	-2.33819	T
ARHGEF10	-0.402423	7.47516	-4.85253	0.00430884	0.040651	-2.33942	T
LOC124418107	-0.760698	3.38989	-4.85013	0.00431813	0.0407149	-2.34188	T
ADHFE1	-0.96741	3.27465	-4.83998	0.00435763	0.0410394	-2.3523	T
LOC112531799	1.24484	2.48217	4.83907	0.00436122	0.0410493	-2.35324	T
BCORL1	0.278881	9.64344	4.83629	0.00437209	0.0411037	-2.35609	T
MIR15C	-0.603199	4.60691	-4.83029	0.00439577	0.0412784	-2.36227	T
CROCC	-0.455537	12.9023	-4.82605	0.00441256	0.0413817	-2.36663	T
TNC	-0.780803	9.34771	-4.82574	0.00441378	0.0413817	-2.36694	T
NME1	0.531528	3.25011	4.82516	0.00441609	0.0413817	-2.36754	T
ECHS1	-0.269479	9.39315	-4.82466	0.00441808	0.0413817	-2.36806	T
ZXDC	-0.377654	9.25779	-4.82428	0.00441958	0.0413817	-2.36845	T
CDCA7	-0.297595	11.2765	-4.8226	0.00442627	0.0414204	-2.37018	T
SDC2	1.50005	6.72993	4.81827	0.00444357	0.0415582	-2.37464	T
RASAL3	-0.299751	10.1293	-4.8162	0.00445189	0.0415878	-2.37678	T
SCUBE3	-0.515895	3.86142	-4.81325	0.00446374	0.0416506	-2.37982	T
CISH	1.06841	3.78118	4.81324	0.00446376	0.0416506	-2.37982	T
LOC107053702	1.99956	2.00976	4.80872	0.00448199	0.0417965	-2.38448	T
LOC112532054	2.246	3.66044	4.80617	0.00449234	0.0418448	-2.38712	T
TGFBR2L	-0.513455	7.18103	-4.80435	0.0044997	0.0418774	-2.38899	T
SMARCB1	0.513775	9.32416	4.80067	0.00451468	0.0419637	-2.39279	T
LOC770026	2.94522	2.86577	4.80047	0.00451549	0.0419637	-2.393	T
FGFR2	0.649344	6.79606	4.79676	0.00453065	0.0420562	-2.39683	T
TMCO3	-0.301264	8.65868	-4.79484	0.00453854	0.0420813	-2.39882	T
TMSB15B	-0.347505	8.26188	-4.79356	0.00454377	0.0420813	-2.40014	T
VWA8	0.270834	9.59886	4.79243	0.00454843	0.0420866	-2.40131	T
HCN4	-0.676246	4.97515	-4.79097	0.00455445	0.0421078	-2.40282	T
METTL18	0.291369	8.28229	4.7888	0.00456338	0.0421181	-2.40506	T
LOC124417918	1.40431	2.9687	4.78753	0.00456865	0.0421186	-2.40638	T
LOC124417794	-0.692641	4.26095	-4.7859	0.00457539	0.0421567	-2.40807	T
LOC121107937	1.05508	3.98704	4.78245	0.00458968	0.0422643	-2.41163	T
DOK1	-0.266141	9.58398	-4.78016	0.00459924	0.0422801	-2.41401	T
WIPF3	0.483054	4.66297	4.77876	0.00460507	0.0423096	-2.41546	T
BRCA2	-0.613523	8.87932	-4.77725	0.00461136	0.0423433	-2.41702	T
LOC124417089	0.955083	6.28079	4.77561	0.00461821	0.0423751	-2.41872	T
FBP1	-0.322374	8.89073	-4.77264	0.00463068	0.042397	-2.4218	T
ADGB	1.43299	3.80828	4.7721	0.00463295	0.042397	-2.42236	T
YPEL1	-0.374058	9.47534	-4.76682	0.0046552	0.0425524	-2.42784	T
TTC9	0.361211	5.11709	4.7652	0.00466203	0.0425606	-2.42951	T
SYK	-0.293243	9.25242	-4.76116	0.00467917	0.0426294	-2.43371	T
SRD5A3	0.273614	7.12867	4.7606	0.00468154	0.0426294	-2.43429	T
LOC112532217	0.839442	4.02572	4.76048	0.00468209	0.0426294	-2.43442	T
LOC107054776	-0.353506	9.58778	-4.75496	0.0047056	0.0428097	-2.44015	T
SRPRA	0.265724	11.177	4.75415	0.00470909	0.0428097	-2.441	T
ANK3	-0.393795	7.72424	-4.75362	0.00471135	0.0428097	-2.44154	T
AEBP2	0.398382	9.90186	4.75309	0.00471365	0.0428097	-2.4421	T
NOTUM	-0.47956	5.88988	-4.75098	0.00472267	0.0428097	-2.44429	T
IL4R	0.473301	9.20137	4.75089	0.00472308	0.0428097	-2.44439	T
AGBL1	-0.770581	3.73293	-4.74746	0.00473784	0.0429194	-2.44795	T
SASH1	0.347293	9.51688	4.74567	0.00474557	0.0429413	-2.44982	T
EFHC2	1.44228	2.43097	4.74076	0.00476682	0.0431094	-2.45492	T
LOC107049489	0.812894	3.20538	4.73974	0.00477125	0.0431144	-2.45599	T
GSTA3	-0.43443	9.35937	-4.73782	0.0047796	0.0431284	-2.45798	T
CMIP	-0.376147	10.8305	-4.73244	0.00480311	0.0432864	-2.46359	T
HSD17B11	0.48441	5.57508	4.73198	0.00480513	0.0432864	-2.46407	T
LOC112531260	0.554502	7.18371	4.73041	0.00481201	0.0433241	-2.46571	T
CDCP2	-0.329237	6.38062	-4.72404	0.00484006	0.0434695	-2.47235	T
LOC121111415	-0.615081	7.75611	-4.72249	0.00484695	0.0434695	-2.47398	T
COLEC12	-1.2569	1.1447	-4.72248	0.00484698	0.0434695	-2.47398	T
CLDN1	-1.2569	1.1447	-4.72248	0.00484698	0.0434695	-2.47398	T
KLHL34	-1.2569	1.1447	-4.72248	0.00484698	0.0434695	-2.47398	T
LOC101751137	-1.2569	1.1447	-4.72248	0.00484698	0.0434695	-2.47398	T
CSRP1	0.267672	9.31027	4.71582	0.00487658	0.0437107	-2.48094	T
SULT1E1	0.274651	8.97132	4.71178	0.00489461	0.0438237	-2.48516	T
LOC428525	-1.18529	1.6	-4.71078	0.00489909	0.0438396	-2.4862	T
OAF	-0.342049	6.55437	-4.70927	0.00490587	0.0438522	-2.48779	T
SRSF4	-0.326133	8.95864	-4.70926	0.00490594	0.0438522	-2.4878	T
LOC121111637	-1.03079	1.76385	-4.70693	0.00491642	0.0438907	-2.49024	T
DBNL	-0.276689	11.4045	-4.70633	0.0049191	0.0438907	-2.49086	T
LOC121109913	0.446328	5.34016	4.70244	0.00493665	0.0439483	-2.49493	T
LOC121107932	0.967447	5.22284	4.70211	0.00493814	0.0439483	-2.49528	T
YEATS4	0.270725	10.003	4.70205	0.00493844	0.0439483	-2.49535	T
TEAD3	-1.0588	6.22019	-4.70118	0.00494235	0.0439589	-2.49625	T
GTF2A2	0.327385	8.34372	4.6993	0.0049509	0.0439963	-2.49822	T
NCAPH	-0.268927	10.1413	-4.69905	0.00495199	0.0439963	-2.49848	T
SDC4	0.341962	7.84006	4.69742	0.00495943	0.044014	-2.50019	T
LOC121107412	-0.539257	4.1594	-4.68831	0.00500103	0.0443587	-2.50974	T
LOC121108016	1.13925	4.24272	4.68699	0.00500708	0.0443711	-2.51112	T
LOC107054664	-0.913891	4.63696	-4.68681	0.00500791	0.0443711	-2.51131	T
DEUP1	0.875361	2.06091	4.68459	0.00501817	0.0444376	-2.51364	T
PDS5B	-0.409472	9.973	-4.68379	0.00502184	0.0444393	-2.51448	T
AAK1	-0.280043	10.6252	-4.68335	0.00502387	0.0444393	-2.51494	T
CHST6	0.271196	8.49671	4.6779	0.00504909	0.0446001	-2.52066	T
C6orf132	0.912664	4.699	4.67645	0.00505583	0.0446001	-2.52219	T
MSH3	-0.284099	8.88658	-4.67441	0.00506535	0.0446218	-2.52434	T
LAPTM5	-0.308585	12.3015	-4.67337	0.00507015	0.0446218	-2.52542	T
MBOAT1	-0.291893	8.58044	-4.67334	0.00507031	0.0446218	-2.52545	T
APOH	1.06554	0.699436	4.67178	0.00507762	0.0446218	-2.5271	T
LOC112530313	1.06554	0.699436	4.67178	0.00507762	0.0446218	-2.5271	T
LOC121107701	1.06554	0.699436	4.67178	0.00507762	0.0446218	-2.5271	T
FZD8	0.302889	7.08944	4.66881	0.00509148	0.0447192	-2.53021	T
DCST2	1.223	5.01576	4.66563	0.00510644	0.0448263	-2.53357	T
TMPRSS6	-1.01355	4.62799	-4.66251	0.00512114	0.0448822	-2.53685	T
SPDL1	-0.380174	9.26129	-4.6572	0.00514627	0.0450536	-2.54244	T
ZNF507	-0.398084	8.18513	-4.65627	0.00515065	0.0450619	-2.54341	T
BCL10	0.291955	9.20708	4.65582	0.0051528	0.0450619	-2.54389	T
SPTBN1	-0.368757	10.1626	-4.65293	0.00516656	0.0451146	-2.54694	T
AMOTL1	0.36889	8.66585	4.65272	0.00516755	0.0451146	-2.54715	T
SLC39A6	0.337008	10.0333	4.65137	0.00517399	0.0451251	-2.54858	T
MPC2	0.31769	10.6178	4.64341	0.0052122	0.0453753	-2.55698	T
WDR61	0.358374	8.69286	4.64307	0.00521384	0.0453753	-2.55734	T
LOC107054087	1.22107	3.49045	4.64188	0.00521957	0.0453753	-2.5586	T
FAM221A	-0.94957	6.59069	-4.64155	0.00522114	0.0453753	-2.55894	T
LOC422154	0.428359	4.88795	4.64134	0.00522216	0.0453753	-2.55916	T
CNIH4	0.27342	7.385	4.64072	0.00522514	0.0453753	-2.55981	T
LOC107053345	-0.34986	6.56049	-4.64002	0.00522854	0.0453805	-2.56056	T
METTL8	-0.359821	8.18207	-4.63592	0.0052484	0.045504	-2.56489	T
PRTFDC1	0.281931	9.41942	4.63288	0.00526315	0.0455945	-2.56809	T
MMP2	-0.396778	7.14136	-4.63261	0.00526448	0.0455945	-2.56838	T
CA2	-0.304866	7.29706	-4.63063	0.00527417	0.0455992	-2.57048	T
PANX3	-0.296705	5.60744	-4.63019	0.00527632	0.0455992	-2.57094	T
LOC420411	0.405164	7.8226	4.61907	0.00533094	0.0459616	-2.58271	T
ANGPT1	-0.784409	5.37462	-4.61828	0.00533484	0.0459616	-2.58354	T
TADA2B	0.278481	7.98309	4.61802	0.00533614	0.0459616	-2.58382	T
SH3GL1	0.38127	9.14676	4.61761	0.00533816	0.0459616	-2.58425	T
RABL2A	0.28976	7.4995	4.61562	0.00534802	0.0459746	-2.58636	T
E2F5	0.513715	9.3072	4.61512	0.00535048	0.0459746	-2.58688	T
SLC25A25	0.340467	9.81658	4.61447	0.00535373	0.0459746	-2.58758	T
LOC107052763	-0.54725	5.69124	-4.61437	0.00535423	0.0459746	-2.58768	T
GBE	1.07905	2.73217	4.61329	0.00535957	0.0459746	-2.58882	T
LOC121107967	0.60092	4.23424	4.60508	0.0054006	0.0462528	-2.59753	T
UHRF1	-0.335595	11.7376	-4.60366	0.00540775	0.0462895	-2.59904	T
PLEKHA1	-0.386267	8.59996	-4.60046	0.00542387	0.0463737	-2.60244	T
SMIM11	0.455591	6.47255	4.59976	0.00542738	0.0463737	-2.60318	T
LOC107050476	-0.735527	5.15855	-4.59453	0.00545384	0.0465607	-2.60873	T
MAFK	0.395868	11.2639	4.59202	0.00546661	0.0466206	-2.6114	T
DTL	-0.263607	8.76598	-4.5897	0.00547841	0.0466965	-2.61386	T
CD86	0.742285	5.38006	4.58903	0.00548187	0.0467013	-2.61458	T
GTPBP4	0.289504	10.4328	4.58752	0.00548958	0.0467335	-2.61619	T
CNPY3	-0.275095	10.1714	-4.58716	0.00549143	0.0467335	-2.61657	T
AADAT	-0.299842	8.38248	-4.58367	0.00550926	0.046836	-2.62027	T
GUK1	-0.414417	7.88116	-4.58279	0.0055138	0.0468394	-2.62121	T
SENP8	0.318005	7.77648	4.57993	0.00552853	0.0469011	-2.62426	T
SGK494	-0.315845	6.76602	-4.57913	0.00553264	0.0469114	-2.62511	T
CLIP4	0.390044	8.10558	4.5768	0.00554468	0.0469887	-2.62759	T
SYBU	-0.418348	6.44262	-4.57575	0.00555012	0.0470102	-2.6287	T
LOC101748231	0.476252	5.52569	4.5737	0.00556078	0.0470759	-2.6309	T
MVD	0.278172	9.97997	4.57274	0.00556575	0.0470932	-2.63192	T
GPR157	-0.646446	7.75689	-4.57057	0.00557705	0.0471449	-2.63423	T
LOC121110378	0.51196	7.2185	4.57044	0.00557769	0.0471449	-2.63436	T
SOUL	-0.986072	1.51664	-4.56927	0.00558383	0.0471529	-2.63562	T
RNF170	0.309543	7.89744	4.56914	0.00558447	0.0471529	-2.63575	T
SMC2	-0.51018	12.0337	-4.56851	0.00558777	0.0471561	-2.63642	T
CREB3L1	-0.267972	9.03844	-4.56547	0.00560365	0.047222	-2.63966	T
MIR1624	-1.44358	0.988041	-4.56534	0.00560434	0.047222	-2.6398	T
ENTPD1	-0.519718	8.29501	-4.56449	0.00560878	0.0472348	-2.64071	T
VNN2	0.794845	3.07504	4.56356	0.00561369	0.0472515	-2.64171	T
PSMD3	0.344383	12.702	4.56298	0.00561674	0.0472525	-2.64232	T
APOA2	-1.3435	1.188	-4.56156	0.00562421	0.0472532	-2.64384	T
LOC112533164	-1.3435	1.188	-4.56156	0.00562421	0.0472532	-2.64384	T
CHGA	1.26368	2.67457	4.56018	0.00563144	0.0472532	-2.64531	T
OGN	-0.834928	5.86019	-4.55923	0.00563643	0.0472706	-2.64632	T
IFT46	1.0657	5.71807	4.55617	0.00565263	0.0473819	-2.64959	T
POLE2	-0.31698	9.74524	-4.55509	0.00565833	0.047405	-2.65074	T
VEGFA	-0.383797	6.7244	-4.55234	0.0056729	0.0474701	-2.65368	T
SUSD3	0.606466	8.20916	4.55213	0.00567404	0.0474701	-2.65391	T
ATP5J2	0.478545	8.54217	4.5512	0.00567899	0.0474701	-2.6549	T
TFG	0.267729	10.1176	4.55086	0.00568078	0.0474701	-2.65526	T
LOC107049235	1.95193	1.52262	4.54815	0.00569525	0.0475663	-2.65817	T
GCK	-0.651193	7.12206	-4.54588	0.00570734	0.0475935	-2.66059	T
RAPH1	0.294626	9.27177	4.54528	0.00571056	0.0475959	-2.66123	T
LOC107050083	-0.303948	10.9154	-4.54456	0.00571439	0.0476029	-2.66199	T
ARID5B	0.387138	7.99546	4.54402	0.0057173	0.0476029	-2.66257	T
BCL9	-0.390661	8.53806	-4.54306	0.00572246	0.0476214	-2.66361	T
LOC101748278	-1.46424	1.24837	-4.54029	0.00573731	0.0476924	-2.66656	T
LOC101752273	-1.46424	1.24837	-4.54029	0.00573731	0.0476924	-2.66656	T
EPHX1	0.489011	7.6237	4.53982	0.00573985	0.0476924	-2.66707	T
PMP22	-0.560325	7.66161	-4.5385	0.00574697	0.0477248	-2.66848	T
MEGF11	-0.545091	4.30196	-4.53729	0.0057535	0.0477248	-2.66978	T
LOC112532538	-1.27708	1.66214	-4.53711	0.00575449	0.0477248	-2.66997	T
LOC112532788	1.6231	2.43478	4.53691	0.00575556	0.0477248	-2.67019	T
BMPR2	-0.344268	10.0013	-4.53405	0.00577104	0.0478041	-2.67325	T
FAM149A	-0.314928	8.19708	-4.53292	0.00577716	0.0478303	-2.67446	T
RPL22L1	0.377151	8.20564	4.53121	0.00578644	0.0478313	-2.67629	T
LOC121109988	-0.373983	6.14675	-4.53032	0.00579126	0.0478313	-2.67724	T
SNX20	0.384971	7.96717	4.53017	0.00579209	0.0478313	-2.67741	T
LOC777039	0.500208	6.31678	4.52912	0.0057978	0.0478541	-2.67853	T
TRMT44	-0.34401	7.7639	-4.52813	0.00580321	0.0478568	-2.67959	T
G2E3	-0.299622	10.0072	-4.52798	0.00580405	0.0478568	-2.67976	T
LOC121109590	-0.588642	2.68877	-4.52618	0.00581385	0.0479132	-2.68168	T
AS3MT	-0.309561	9.01091	-4.52473	0.00582177	0.0479173	-2.68324	T
LOC121108032	0.808171	5.99385	4.52191	0.00583726	0.0479672	-2.68627	T
PELI3	0.294837	9.36368	4.52173	0.00583822	0.0479672	-2.68646	T
RAB2A	0.360958	10.6008	4.51907	0.00585283	0.048057	-2.68931	T
PLK4	-0.291961	9.76255	-4.51751	0.00586147	0.0480605	-2.69099	T
CFAP74	-0.599089	5.45218	-4.51622	0.00586856	0.0480867	-2.69237	T
GINS3	-0.339026	8.43873	-4.51565	0.00587175	0.0480867	-2.69299	T
LOC107054877	1.26079	3.57333	4.51468	0.00587711	0.0480911	-2.69403	T
GPR65	-0.75764	5.90304	-4.51408	0.00588041	0.0480938	-2.69467	T
PADI2	-1.04276	2.99415	-4.51179	0.00589308	0.048173	-2.69713	T
MFAP5	-0.478226	4.98346	-4.50567	0.00592716	0.0484271	-2.7037	T
RWDD2A	0.391029	7.11833	4.50136	0.00595131	0.0485448	-2.70834	T
TG	-0.486426	4.98871	-4.50046	0.00595635	0.0485448	-2.70931	T
LOC124417173	-0.46644	5.4617	-4.50038	0.00595683	0.0485448	-2.7094	T
ASTL	-1.00232	1.50851	-4.49989	0.00595958	0.0485448	-2.70993	T
LOC121109473	0.841403	4.72125	4.49922	0.00596333	0.0485509	-2.71064	T
USP30	0.294129	9.58319	4.49595	0.0059818	0.0486734	-2.71417	T
SLK	-0.28181	12.4135	-4.49512	0.00598645	0.0486734	-2.71506	T
LOC101750271	1.40419	2.59598	4.49445	0.00599025	0.0486734	-2.71578	T
LOC121106444	0.964817	5.66256	4.49442	0.00599044	0.0486734	-2.71582	T
GDF15	0.283144	8.63145	4.49383	0.00599376	0.048676	-2.71645	T
SEMA3DL	-0.309345	7.85303	-4.49019	0.00601441	0.0487383	-2.72037	T
IRF5	-0.398538	10.1023	-4.48982	0.00601652	0.0487383	-2.72077	T
LOC121107289	0.486597	4.72889	4.48774	0.00602834	0.0488096	-2.72301	T
LOC107053559	2.49311	1.41322	4.48291	0.00605596	0.0489841	-2.72822	T
PEBP1	-0.318197	9.41431	-4.48078	0.00606815	0.0490529	-2.73052	T
GLCCI1	-0.36278	9.7055	-4.47931	0.0060766	0.0490529	-2.73211	T
N6AMT1	0.479686	8.20057	4.47781	0.00608522	0.049098	-2.73372	T
ZDHHC15	0.354553	10.1901	4.47543	0.00609894	0.0491836	-2.73629	T
DCUN1D5	0.354816	8.94428	4.47492	0.00610191	0.0491836	-2.73685	T
LOC121111051	1.85692	2.55169	4.46936	0.00613411	0.0493446	-2.74285	T
CARMIL3	-0.530298	8.84172	-4.46716	0.00614692	0.049423	-2.74522	T
ACSS3	-0.666763	6.77296	-4.46613	0.00615295	0.0494469	-2.74634	T
PPARD	0.439423	8.17018	4.46521	0.00615833	0.0494656	-2.74734	T
ODF2L	-0.371965	9.77146	-4.45967	0.00619076	0.0496767	-2.75333	T
LOC121107791	0.796027	6.47379	4.45806	0.00620023	0.049684	-2.75507	T
TEX2L	-0.378811	7.58484	-4.45731	0.00620468	0.049684	-2.75589	T
BCR	-0.300619	10.5761	-4.4569	0.00620704	0.049684	-2.75632	T
CST7	0.656282	8.2007	4.45258	0.00623259	0.0498638	-2.76101	T
LOC124417777	0.260551	8.71651	6.52483	0.00112941	0.0197048	-0.803541	F
AP1G1	0.258867	10.9135	6.30872	0.00132116	0.0216106	-0.983561	F
COL5A2	-0.251483	10.3532	-6.24308	0.0013868	0.0220374	-1.03923	F
SFPQ	-0.263029	12.5949	-6.20954	0.00142181	0.0223738	-1.06786	F
MAFB	-0.253174	11.8678	-6.1355	0.00150284	0.0230649	-1.13149	F
BCL11A	-0.243113	8.25895	-6.03748	0.00161859	0.024134	-1.21669	F
RAC2	0.255548	12.2801	6.01474	0.00164691	0.0243957	-1.2366	F
RAB21	0.241698	11.6881	6.00059	0.00166484	0.0245125	-1.24903	F
FMNL1	0.252158	11.6046	5.99895	0.00166693	0.0245125	-1.25048	F
MSMO1	0.259879	12.3932	5.9433	0.00173976	0.0249348	-1.29958	F
SLC16A1	-0.252654	12.4484	-5.914	0.00177961	0.0251133	-1.32557	F
OSBPL7	-0.251667	8.88959	-5.89837	0.0018013	0.025267	-1.33948	F
TIPRL	-0.233509	9.8667	-5.85997	0.00185591	0.0256354	-1.37377	F
ZBTB46	0.255283	10.6831	5.85489	0.00186328	0.0256821	-1.37832	F
TEAD1	0.238221	9.61807	5.84224	0.00188179	0.0257507	-1.38966	F
PRIM2	-0.259746	9.01282	-5.78351	0.00197054	0.0265297	-1.44257	F
PPA2	-0.261867	11.1698	-5.72776	0.00205937	0.0272129	-1.49318	F
CRIM1	-0.226104	11.0834	-5.68884	0.00212415	0.0276833	-1.52873	F
DUS2	-0.230123	8.83491	-5.67606	0.00214593	0.0277409	-1.54044	F
SLC25A24	0.242938	10.8448	5.67047	0.00215556	0.0277698	-1.54558	F
PSMA6	0.236933	11.1551	5.66709	0.00216139	0.0277886	-1.54868	F
MCM3	-0.254038	11.6091	-5.63483	0.00221805	0.0283591	-1.57838	F
MYB	0.232801	13.6939	5.59217	0.00229565	0.0288043	-1.61784	F
TTPAL	0.250402	9.72722	5.59064	0.00229849	0.0288176	-1.61926	F
SNAPC1	-0.238421	8.41098	-5.56902	0.00233908	0.0291257	-1.63935	F
CBX6	-0.233069	10.4308	-5.55015	0.0023752	0.0293468	-1.65693	F
C4H4ORF32	0.237819	9.89089	5.54322	0.00238862	0.0294581	-1.66339	F
KIF13A	-0.244731	9.48078	-5.51674	0.00244075	0.0297473	-1.68816	F
FOXK2	0.24555	10.1784	5.51474	0.00244474	0.0297511	-1.69004	F
HSPA12A	-0.252022	7.86556	-5.50745	0.00245935	0.0299063	-1.69687	F
OSBPL10	-0.261578	8.44524	-5.49749	0.00247948	0.0300382	-1.70623	F
NOD1	-0.238828	9.93561	-5.487	0.0025009	0.0301561	-1.71609	F
PTTG1IP	-0.23933	10.3373	-5.48039	0.0025145	0.0301987	-1.72232	F
MRPL16	-0.249693	9.68314	-5.41473	0.00265437	0.0311753	-1.78441	F
FH	0.260185	10.1319	5.4086	0.00266789	0.0312524	-1.79024	F
VANGL2	-0.222839	8.66774	-5.40602	0.00267362	0.0312651	-1.7927	F
UBE2L3	0.258305	10.5916	5.39081	0.00270759	0.0315482	-1.80718	F
HN1	0.262866	11.8943	5.38422	0.00272246	0.031653	-1.81346	F
CHD4	-0.245496	11.8613	-5.37869	0.00273502	0.0316808	-1.81874	F
SQLE	0.249445	11.1381	5.36373	0.00276932	0.0318832	-1.83304	F
TAF1B	-0.21644	8.28208	-5.35778	0.00278311	0.0320127	-1.83873	F
TAF5L	-0.215363	11.8	-5.32997	0.00284862	0.0324252	-1.86541	F
DTYMK	-0.260642	10.5472	-5.32442	0.0028619	0.0325386	-1.87074	F
CXorf40B	0.244144	7.79734	5.32162	0.00286863	0.0325561	-1.87343	F
ALOX5	-0.260206	10.9393	-5.31081	0.00289479	0.0327839	-1.88384	F
PAM	0.21498	13.3611	5.27929	0.00297265	0.0332464	-1.91428	F
KDM2B	0.205849	10.4978	5.27599	0.00298094	0.0332853	-1.91747	F
HEPH	0.255077	11.9262	5.27527	0.00298274	0.0332853	-1.91816	F
SSU72	0.238923	9.57084	5.27303	0.0029884	0.033295	-1.92033	F
PPM1L	-0.218166	8.10474	-5.26473	0.00300943	0.0334035	-1.92837	F
OGDH	0.220253	11.3814	5.25877	0.00302465	0.0335088	-1.93416	F
KIF3A	0.210249	9.60145	5.25456	0.00303546	0.0335542	-1.93825	F
UBTF	0.233521	11.1669	5.25412	0.00303659	0.0335542	-1.93867	F
ATP13A2	-0.242703	13.1196	-5.24251	0.00306662	0.0337619	-1.94995	F
RAE1	0.233231	9.71826	5.23755	0.00307955	0.0338332	-1.95478	F
LOC416147	-0.211526	10.3206	-5.22975	0.00310002	0.0339657	-1.96237	F
SLC35B2	-0.260519	9.07158	-5.2265	0.00310859	0.0339855	-1.96553	F
ORAI1	0.258293	9.14175	5.21108	0.00314968	0.0343005	-1.98058	F
ADAM9	-0.248605	9.29462	-5.20981	0.00315307	0.0343144	-1.98182	F
FPGT	-0.25613	8.29972	-5.20899	0.00315528	0.0343152	-1.98262	F
FAM208B	0.217284	9.96725	5.18837	0.00321131	0.0345577	-2.00279	F
MICALL1	0.22596	9.37905	5.18733	0.00321416	0.0345577	-2.00381	F
URB1	0.252222	8.76085	5.18721	0.0032145	0.0345577	-2.00393	F
TEC	0.240603	8.60375	5.18274	0.0032268	0.0345892	-2.00831	F
PTPN6	-0.210269	11.9802	-5.17873	0.00323789	0.0346321	-2.01224	F
MCM5	-0.214791	12.2125	-5.16444	0.00327778	0.0348272	-2.02627	F
NRF1	-0.221892	8.65104	-5.13924	0.00334954	0.0351963	-2.05109	F
CAP1	-0.212185	13.1472	-5.13483	0.00336228	0.0353072	-2.05543	F
WTAP	-0.260829	11.3108	-5.12718	0.00338449	0.0355173	-2.06298	F
MOB3A	0.245096	9.39303	5.12197	0.00339973	0.0356204	-2.06813	F
DTWD1	0.245142	7.60972	5.1181	0.00341112	0.0356349	-2.07196	F
ADAT1	-0.258082	8.53587	-5.11461	0.0034214	0.0356731	-2.07541	F
LOC772071	-0.213724	11.7336	-5.0953	0.00347903	0.0361047	-2.09454	F
SDF2L1	0.255241	9.97607	5.09003	0.00349496	0.0361564	-2.09978	F
SPATA5	0.20472	8.87675	5.08867	0.00349909	0.0361564	-2.10113	F
HECA	-0.202034	10.6255	-5.08511	0.00350988	0.0361564	-2.10465	F
LOC107049501	0.254034	7.77256	5.07176	0.0035508	0.0363883	-2.11793	F
PHF19	0.246492	9.39691	5.06984	0.00355674	0.0364099	-2.11985	F
RIC8A	-0.229643	8.75473	-5.06642	0.00356734	0.0364548	-2.12325	F
ATP6AP2	-0.224938	13.1327	-5.06602	0.00356856	0.0364548	-2.12364	F
DMAP1	0.250397	9.257	5.04946	0.00362038	0.0367961	-2.14016	F
RALB	0.204732	10.8079	5.04593	0.00363157	0.0367961	-2.14369	F
PPA1	-0.247472	10.7926	-5.03927	0.00365271	0.0369016	-2.15034	F
FAM3C	0.240735	11.317	5.03362	0.00367077	0.0369574	-2.15599	F
CYP51A1	0.235923	11.8117	5.03304	0.00367264	0.0369574	-2.15657	F
LAMTOR3	0.239717	10.0865	5.02292	0.00370528	0.0371757	-2.1667	F
BNIP3	-0.195934	10.0391	-5.01094	0.00374436	0.0374149	-2.17872	F
CDC14B	-0.254596	10.0323	-4.99933	0.00378268	0.0376626	-2.19037	F
CDT1	-0.211331	10.8099	-4.98702	0.00382383	0.0379355	-2.20276	F
CECR1	-0.201137	9.42182	-4.98243	0.0038393	0.0379871	-2.20738	F
GNAI3	-0.255408	12.0907	-4.98043	0.00384606	0.038016	-2.2094	F
LOC107050721	-0.208243	10.73	-4.96626	0.00389438	0.0384232	-2.22369	F
MDM4	0.238071	11.6562	4.96389	0.00390255	0.0384803	-2.22609	F
RCC2	-0.230279	10.8363	-4.96101	0.00391248	0.0385546	-2.229	F
TRA2A	-0.214413	11.3879	-4.95698	0.00392642	0.0386684	-2.23307	F
WDFY3	-0.258563	12.0544	-4.94697	0.00396132	0.0388464	-2.2432	F
CREBRF	-0.241817	9.02374	-4.94559	0.00396613	0.03887	-2.24459	F
CAPZB	0.205163	11.6875	4.94135	0.00398106	0.0389721	-2.24889	F
STAMBP	0.23012	8.85365	4.93653	0.00399809	0.0390176	-2.25377	F
OGFRL1	0.195406	10.592	4.93246	0.00401252	0.0390876	-2.2579	F
FLI1	-0.245376	11.1001	-4.92317	0.00404573	0.039245	-2.26733	F
N4BP2L2	-0.217737	8.13811	-4.92073	0.00405449	0.0392598	-2.26981	F
RCBTB1	-0.259074	10.1332	-4.91462	0.00407657	0.0393776	-2.27602	F
BACH1	-0.25912	10.2717	-4.90051	0.00412806	0.0396126	-2.29038	F
PIK3C3	-0.21207	9.30034	-4.89466	0.00414962	0.0397287	-2.29634	F
NSMCE4A	-0.25863	8.41771	-4.88717	0.0041774	0.039971	-2.30398	F
UNC119B	0.220374	10.5949	4.88037	0.00420285	0.0400717	-2.31093	F
ABCB8	-0.253308	9.2656	-4.87536	0.0042217	0.0401807	-2.31605	F
BICD2	-0.257093	10.7541	-4.86513	0.00426048	0.0404308	-2.32651	F
TXNDC15	0.246967	8.98471	4.8535	0.0043051	0.040651	-2.33843	F
STAG2	-0.254126	11.1311	-4.85304	0.00430688	0.040651	-2.3389	F
PNPLA3	-0.206359	9.82598	-4.84521	0.00433722	0.0408711	-2.34693	F
HNRNPUL1	-0.236618	11.2727	-4.83755	0.00436717	0.0410814	-2.3548	F
VDR	0.20969	8.8358	4.83217	0.00438831	0.0412323	-2.36033	F
MGAT5	-0.226663	13.2309	-4.81735	0.00444727	0.0415687	-2.37559	F
LYST	-0.239963	11.5643	-4.80756	0.00448669	0.0418163	-2.38568	F
EPS15	0.217991	11.3084	4.80403	0.00450102	0.0418774	-2.38933	F
SEC16A	0.21195	11.1609	4.79809	0.0045252	0.0420298	-2.39546	F
SNAP29	-0.22842	9.48404	-4.79475	0.00453889	0.0420813	-2.39891	F
SP1	-0.253914	11.4677	-4.79371	0.00454315	0.0420813	-2.39998	F
KLHL17	-0.262529	8.44706	-4.79216	0.00454955	0.0420866	-2.40159	F
POLR1B	-0.251883	9.81506	-4.78897	0.0045627	0.0421181	-2.40489	F
RIPK1	0.220156	9.99435	4.7889	0.00456296	0.0421181	-2.40496	F
HIF1A	0.191847	11.4367	4.78787	0.00456724	0.0421186	-2.40603	F
NUBP1	0.241523	9.10756	4.78149	0.0045937	0.0422644	-2.41263	F
THAP6	-0.193097	10.4495	-4.78119	0.00459492	0.0422644	-2.41294	F
PIGT	0.228358	10.363	4.77517	0.00462007	0.0423751	-2.41918	F
ZFR2	-0.204746	10.0244	-4.77441	0.00462326	0.0423803	-2.41997	F
SERINC3	0.233778	11.7225	4.7737	0.00462624	0.0423836	-2.4207	F
MRPL33	0.223426	8.37788	4.76938	0.00464439	0.0424776	-2.42518	F
GRB10	0.196788	10.2786	4.76567	0.00466007	0.0425606	-2.42903	F
OLFM2	-0.200855	8.90598	-4.76474	0.00466399	0.0425606	-2.42999	F
PINLYP	-0.226089	9.91989	-4.76202	0.00467552	0.0426294	-2.43282	F
ITSN2	-0.216437	9.79519	-4.75262	0.00471565	0.0428097	-2.44259	F
CTSA	-0.209519	11.2859	-4.75198	0.00471839	0.0428097	-2.44325	F
NT5C1B	-0.222484	10.0388	-4.74588	0.00474465	0.0429413	-2.44959	F
LOC426193	0.232491	9.63851	4.73939	0.0047728	0.0431144	-2.45636	F
GALNT1	-0.222983	11.6765	-4.73879	0.00477537	0.0431144	-2.45697	F
TAF1A	-0.197408	7.92589	-4.73472	0.00479312	0.0432264	-2.46121	F
STAG1	-0.198106	10.02	-4.72646	0.00482941	0.0434566	-2.46983	F
MAP2K5	-0.204584	9.76929	-4.71391	0.00488508	0.0437626	-2.48293	F
TPX2	-0.187545	11.7765	-4.70594	0.00492087	0.0438907	-2.49127	F
MBD5	0.204984	9.58047	4.70589	0.0049211	0.0438907	-2.49133	F
POLR2L	-0.259763	9.24712	-4.70492	0.00492546	0.0439054	-2.49234	F
CCDC191	0.213859	6.87975	4.69794	0.00495707	0.044014	-2.49965	F
VLDLR	-0.230526	9.60119	-4.67764	0.00505029	0.0446001	-2.52094	F
NASP	-0.213755	10.4698	-4.67718	0.00505244	0.0446001	-2.52142	F
SEC11C	0.209548	9.89188	4.67685	0.00505397	0.0446001	-2.52177	F
ADAM23	-0.223831	10.1547	-4.67277	0.005073	0.0446218	-2.52606	F
DOCK4	-0.206443	9.51217	-4.66328	0.00511748	0.0448822	-2.53603	F
EOGT	-0.215996	9.03472	-4.66293	0.00511916	0.0448822	-2.53641	F
ZDHHC12	0.230142	8.49573	4.66088	0.00512884	0.0449253	-2.53857	F
KAT14	-0.198611	9.93317	-4.65384	0.00516222	0.0451146	-2.54598	F
ZNF687	0.218332	9.65672	4.65221	0.00516999	0.0451146	-2.54769	F
CCDC50	-0.25064	12.0929	-4.64982	0.0051814	0.0451654	-2.55021	F
AGO2	0.25937	9.62279	4.64097	0.00522392	0.0453753	-2.55955	F
SELENOW	-0.237823	10.7428	-4.63801	0.00523826	0.0454404	-2.56268	F
AHSA2	-0.245805	9.18985	-4.63057	0.00527442	0.0455992	-2.57053	F
AAR2	-0.216469	10.5067	-4.63037	0.0052754	0.0455992	-2.57075	F
ETV5	-0.207794	9.65097	-4.62557	0.0052989	0.04577	-2.57582	F
GPN2	-0.213261	9.4635	-4.61945	0.00532906	0.0459616	-2.5823	F
PEX26	0.255871	9.65875	4.61906	0.00533099	0.0459616	-2.58272	F
SPAG1	0.246088	8.89918	4.61634	0.00534443	0.0459746	-2.58559	F
GALNT2	0.23273	9.39339	4.61342	0.00535895	0.0459746	-2.58869	F
DCBLD2	-0.201721	8.53867	-4.60839	0.00538403	0.0461599	-2.59402	F
GSN	-0.181599	10.4643	-4.60574	0.00539731	0.0462492	-2.59683	F
RNF20	-0.234616	11.5819	-4.60282	0.00541196	0.046301	-2.59993	F
UBA52	0.213442	11.245	4.59943	0.00542906	0.0463737	-2.60353	F
TMEM35A	0.263013	8.33834	4.59245	0.0054644	0.0466206	-2.61094	F
PEPD	-0.179941	11.131	-4.58528	0.00550104	0.0467907	-2.61857	F
BYSL	-0.234871	10.0157	-4.58201	0.00551783	0.0468394	-2.62204	F
PTBP1	-0.17904	12.6933	-4.58191	0.00551836	0.0468394	-2.62215	F
MYBL2	-0.177444	10.222	-4.56688	0.00559631	0.0472035	-2.63817	F
SENP5	0.235253	10.5287	4.56088	0.00562778	0.0472532	-2.64456	F
LUC7L	0.216773	9.71083	4.56042	0.00563019	0.0472532	-2.64505	F
OGT	-0.181547	11.7585	-4.55089	0.00568063	0.0474701	-2.65523	F
NUSAP1	-0.235581	10.1445	-4.54732	0.00569963	0.0475783	-2.65904	F
PPP1R36	0.206158	9.32971	4.54672	0.00570284	0.0475806	-2.65969	F
TRIAP1	-0.249465	9.41289	-4.53493	0.00576625	0.0477889	-2.6723	F
[truncated: 14,163 more rows]

## Sheet: LPS CTR
Limma resutls for LPS/CTR
Transcript	logFC	AveExpr	t	P.Value	adj.P.Val	B	Diff
C1QB	-4.31727	9.06884	-73.1509	5.21485e-09	4.73476e-05	10.6721	T
IL13RA2	5.91471	8.0797	66.3839	8.61768e-09	4.73476e-05	10.4272	T
IL8L2	4.60766	10.0295	63.8948	1.05018e-08	4.73476e-05	10.3231	T
C1QC	-4.18028	9.0572	-62.5547	1.1719e-08	4.73476e-05	10.2634	T
K123	4.28288	8.02966	51.7937	3.11118e-08	8.47237e-05	9.67112	T
A4GALT	3.72166	7.67673	51.684	3.14549e-08	8.47237e-05	9.66385	T
IL8L1	4.48578	9.08202	48.627	4.3111e-08	8.62754e-05	9.449	T
LOC112532538	-3.50692	1.75346	-47.9295	4.6454e-08	8.62754e-05	9.39646	T
NOS2	3.4926	9.62749	47.6181	4.80465e-08	8.62754e-05	9.37255	T
CD274	3.67819	9.28024	46.0511	5.71179e-08	9.23083e-05	9.24788	T
SNX10	2.63958	10.5963	44.7537	6.62092e-08	9.72733e-05	9.13882	T
LECT2	2.93216	14.7136	41.8992	9.30714e-08	0.00010388	8.87847	T
MRGPRH	2.99902	11.6751	40.9933	1.04197e-07	0.00010388	8.78947	T
IL1B	5.18248	10.9338	40.3523	1.13035e-07	0.00010388	8.72448	T
ENKUR	2.0445	6.94641	40.2008	1.15252e-07	0.00010388	8.70888	T
LOC395551	3.63586	9.44457	39.6166	1.24305e-07	0.00010388	8.64778	T
CD72L1	2.20207	9.85408	39.3357	1.28958e-07	0.00010388	8.61788	T
CSMD1	2.33541	9.55066	39.3153	1.29303e-07	0.00010388	8.6157	T
HEPHL1	2.65408	8.60188	39.1546	1.32068e-07	0.00010388	8.59842	T
UNC13D	2.14534	8.91102	38.8426	1.37639e-07	0.00010388	8.56454	T
SEMA6C	1.95101	7.88451	38.245	1.49112e-07	0.00010388	8.49841	T
CAPN14	2.47335	9.36227	38.0715	1.52655e-07	0.00010388	8.4789	T
CSF1R	-2.75786	10.8405	-38.0426	1.53254e-07	0.00010388	8.47564	T
AVD	6.45723	9.42518	37.7979	1.58447e-07	0.00010388	8.44785	T
LOC107055195	3.01128	6.85499	37.6949	1.60695e-07	0.00010388	8.43606	T
BTG2	2.28029	9.10352	36.69	1.8475e-07	0.000112488	8.31837	T
PMEPA1	-2.12211	9.02668	-36.5688	1.87932e-07	0.000112488	8.30384	T
BIRC2	1.95249	10.5493	36.1682	1.9893e-07	0.000114818	8.25524	T
NFKBIZ	1.87104	9.82258	35.3735	2.231e-07	0.000122619	8.15634	T
WDFY4	2.36543	9.57995	35.178	2.29574e-07	0.000122619	8.13148	T
LYZ	2.83568	13.1962	34.6697	2.47483e-07	0.000122619	8.06585	T
NINJ1	2.26607	10.0045	34.49	2.54208e-07	0.000122619	8.0423	T
PTGS2	3.71358	7.02737	34.3979	2.57741e-07	0.000122619	8.03016	T
MMR1L4	-1.95872	11.0215	-34.3919	2.5797e-07	0.000122619	8.02937	T
DNASE2B	-2.42993	8.09011	-33.599	2.90962e-07	0.000131757	7.92274	T
LOC121113402	1.9777	7.09105	33.5425	2.935e-07	0.000131757	7.91499	T
BATF3	2.9136	8.52982	33.1805	3.10396e-07	0.000135576	7.86493	T
S100A12	4.17878	4.98556	32.8614	3.26263e-07	0.000135846	7.82011	T
FBXL21	2.06641	10.8078	32.8309	3.27826e-07	0.000135846	7.8158	T
PI3	5.86045	6.70472	32.5806	3.41029e-07	0.000135902	7.78014	T
ACTA2	2.03665	13.0941	32.4924	3.45827e-07	0.000135902	7.76748	T
LOC419276	2.81613	10.2391	32.36	3.53188e-07	0.000135902	7.74838	T
TGM4	5.08984	6.75032	32.0293	3.72405e-07	0.000139964	7.70017	T
SLC7A3	2.07111	11.8792	31.8123	3.85688e-07	0.000141662	7.66815	T
LOC107052519	-2.36792	8.40465	-31.5841	4.00279e-07	0.000143753	7.63412	T
IL1R2	2.88691	8.08105	31.2499	4.22843e-07	0.000146715	7.58365	T
LOC101750112	3.28585	8.48925	31.1952	4.26682e-07	0.000146715	7.57531	T
CDH23	-2.87174	7.49987	-30.989	4.41523e-07	0.000148655	7.54369	T
MMP23A	3.16009	8.74503	30.3035	4.95489e-07	0.00016342	7.43639	T
IL4I1	4.40375	5.1333	29.9466	5.26685e-07	0.000170235	7.37916	T
LOC121113374	1.51942	0.759712	29.7763	5.42397e-07	0.000171876	7.3515	T
NFKBIA	1.73769	11.0434	29.4539	5.73693e-07	0.000175668	7.29854	T
KCTD12B	-2.28809	4.77179	-29.43	5.76102e-07	0.000175668	7.29457	T
WBSCR17	2.37786	7.55573	29.0708	6.13735e-07	0.000183677	7.23453	T
KLF5	1.45374	10.3074	28.7935	6.44803e-07	0.000184542	7.18747	T
UGT2A1	1.83934	11.101	28.7584	6.4886e-07	0.000184542	7.18148	T
TUBD1	1.42882	10.8881	28.6939	6.56413e-07	0.000184542	7.17042	T
CMBL	5.19222	7.26554	28.6337	6.63549e-07	0.000184542	7.16007	T
TRAF2	1.50206	11.029	28.5493	6.73718e-07	0.000184542	7.14551	T
FLRT2	2.44858	7.83166	28.1893	7.19226e-07	0.000193724	7.08274	T
LOC417973	1.74658	8.53825	27.7848	7.74812e-07	0.000198482	7.01087	T
PIGR	6.75119	4.23934	27.7431	7.80822e-07	0.000198482	7.00339	T
C1QA	-3.75523	9.48305	-27.7373	7.81661e-07	0.000198482	7.00235	T
GALNT6	1.37127	11.2956	27.7074	7.86019e-07	0.000198482	6.99697	T
SLC23A2	1.43686	10.3468	27.5676	8.06756e-07	0.00020003	6.97171	T
SH3RF3	2.46755	8.26022	27.5008	8.16903e-07	0.00020003	6.95957	T
P2RY6	-2.53727	8.64541	-27.3758	8.36293e-07	0.000201721	6.93676	T
PEBP4	2.23722	4.93824	26.8785	9.19066e-07	0.000218427	6.8446	T
TTC19	1.8373	9.61082	26.7866	9.35409e-07	0.000219089	6.82733	T
PDE4B	1.36801	9.94455	26.6203	9.65883e-07	0.000222995	6.79585	T
CD83	2.06457	8.13471	26.4099	1.00614e-06	0.000229018	6.75565	T
LOC776507	2.09108	9.69145	26.2794	1.03212e-06	0.000231669	6.7305	T
CHKA	1.66466	11.2157	26.1521	1.05825e-06	0.000234278	6.70581	T
EHD3	1.39626	12.4908	25.9036	1.11153e-06	0.00024275	6.65715	T
VSIR	-2.4981	9.91911	-25.7969	1.13539e-06	0.000244654	6.63607	T
MPEG1	-1.59443	12.1843	-25.4017	1.22925e-06	0.000261393	6.55697	T
MYOF	1.86319	11.7743	25.1953	1.28193e-06	0.000269056	6.51501	T
CCL5	6.51364	5.89205	25.0057	1.3327e-06	0.000275458	6.47609	T
INPP1	2.31004	10.4093	24.9556	1.34652e-06	0.000275458	6.46573	T
RSFR	-1.61228	13.0197	-24.7878	1.39407e-06	0.000281619	6.43086	T
NFKBIE	1.22314	11.2604	24.5268	1.47204e-06	0.000291483	6.37602	T
G0S2	3.5981	8.87943	24.5044	1.47897e-06	0.000291483	6.37128	T
PTPN2	1.40492	11.0698	24.4093	1.50882e-06	0.000293784	6.35109	T
RGCCL	3.87492	4.66557	24.2515	1.56e-06	0.000300132	6.31734	T
PROK2	2.79046	7.88416	23.9675	1.65737e-06	0.000315114	6.25592	T
SLCO4C1	1.84124	12.2613	23.844	1.70195e-06	0.000319829	6.22893	T
EXFABP	3.8135	1.90675	23.667	1.76838e-06	0.000328492	6.18992	T
ACSL1	2.0284	10.1678	23.5258	1.82359e-06	0.000334898	6.15854	T
LOC416169	2.07672	9.93615	23.4659	1.84762e-06	0.000335499	6.14516	T
LOC100858973	1.12723	11.1023	23.2997	1.91635e-06	0.000344112	6.10779	T
IRF8	-1.43473	12.5667	-23.1661	1.9738e-06	0.000345511	6.07751	T
MEF2C	-2.09201	8.17761	-23.1374	1.9864e-06	0.000345511	6.07097	T
NREP	-1.77552	7.44719	-23.1332	1.98827e-06	0.000345511	6.07001	T
DPEP2	-2.63336	9.30118	-22.9307	2.0801e-06	0.000354693	6.02361	T
TMEM123	1.44413	12.3481	22.9202	2.08501e-06	0.000354693	6.02119	T
LOC107052672	-1.92843	7.6743	-22.6743	2.2038e-06	0.000370995	5.9641	T
NTNG2	1.46168	9.18734	22.5426	2.27071e-06	0.000378319	5.93321	T
SRD5A2	1.93311	6.08309	22.4365	2.32637e-06	0.000378432	5.90817	T
HOXD9	1.48456	9.06971	22.4297	2.32998e-06	0.000378432	5.90656	T
UPP1	1.5635	10.4994	22.4079	2.34164e-06	0.000378432	5.9014	T
CMPK2	-1.75778	7.77121	-22.253	2.42655e-06	0.000385057	5.8645	T
RNF19B	1.56833	8.05334	22.2463	2.43028e-06	0.000385057	5.8629	T
LIPG	5.57683	6.89686	22.1986	2.4572e-06	0.000385542	5.85148	T
ATF3	1.26897	9.39835	21.8876	2.64174e-06	0.000410511	5.77622	T
ADA	-1.21519	9.37671	-21.4492	2.93074e-06	0.000451083	5.66786	T
INPP5D	-1.16167	11.393	-21.3455	3.00448e-06	0.00045807	5.64185	T
SEC61A2	1.14909	10.7047	21.2454	3.07782e-06	0.000464866	5.61657	T
PDCD4	-1.11842	13.1108	-21.1283	3.16632e-06	0.000473805	5.58682	T
GLUD2	-1.13008	12.3904	-21.0492	3.22778e-06	0.000478571	5.56663	T
NRK	-1.20318	11.8571	-20.9935	3.27195e-06	0.000480575	5.55234	T
ETS2	1.36722	10.0905	20.9576	3.30077e-06	0.000480575	5.54312	T
MGAT5B	-1.51505	8.87959	-20.7459	3.47712e-06	0.00050173	5.48831	T
CARHSP1	1.30669	9.44834	20.6441	3.5659e-06	0.000509988	5.46171	T
GPR65	-2.13286	5.48886	-20.571	3.63135e-06	0.000514194	5.4425	T
TNFAIP3	1.53645	10.615	20.4968	3.69922e-06	0.000514194	5.42294	T
ECM1	1.36827	11.3728	20.4651	3.72871e-06	0.000514194	5.41454	T
KDELC2	-1.30894	9.78645	-20.4274	3.76411e-06	0.000514194	5.40455	T
IRAK2	1.13437	12.1951	20.392	3.79774e-06	0.000514194	5.39513	T
CYP26B1	2.15713	4.90334	20.3919	3.79778e-06	0.000514194	5.39512	T
LOC427029	2.47475	8.34383	20.357	3.83131e-06	0.000514194	5.38582	T
IFIT5	-2.89734	5.58583	-20.3054	3.88147e-06	0.000514194	5.37204	T
PRKAR2B	1.05896	10.9129	20.3052	3.88167e-06	0.000514194	5.37199	T
PIK3R5	1.3086	11.6965	20.2507	3.93544e-06	0.000515751	5.35741	T
EMB	-1.10421	12.2441	-20.2289	3.95725e-06	0.000515751	5.35155	T
ZC3H12D	-1.72982	5.63476	-20.1772	4.00949e-06	0.000518379	5.33765	T
CHST13	1.34059	12.5363	20.1214	4.06681e-06	0.000521617	5.32258	T
CPEB2	-1.41959	8.20161	-20.0665	4.12414e-06	0.000524805	5.30772	T
GCH1	1.67811	8.90565	20.0293	4.16348e-06	0.000525672	5.29764	T
ABCC4	1.02847	11.3409	19.952	4.24676e-06	0.00053203	5.27659	T
LOC101751171	1.30423	11.9095	19.8416	4.36922e-06	0.000542158	5.24635	T
LOC101751026	3.67586	4.95585	19.8191	4.3947e-06	0.000542158	5.24016	T
GCNT4	1.14333	11.6805	19.7883	4.42976e-06	0.000542344	5.23169	T
SLC6A4	-1.07787	10.2707	-19.5565	4.70529e-06	0.000571746	5.16735	T
LOC107053298	-1.50263	9.47518	-19.5239	4.74567e-06	0.000572349	5.15823	T
DTX2	2.13796	9.83931	19.3755	4.93466e-06	0.000589112	5.11649	T
C9ORF58	-1.37893	10.0532	-19.358	4.95757e-06	0.000589112	5.11153	T
PANK3	1.15368	13.4133	19.255	5.09482e-06	0.000596289	5.0823	T
SLC26A2	1.20803	10.6723	19.2423	5.11203e-06	0.000596289	5.07869	T
FAM169B	1.5336	9.15823	19.2085	5.1582e-06	0.000596289	5.06906	T
SLC2A6	1.21606	9.54935	19.1947	5.17724e-06	0.000596289	5.06511	T
ZNF503	1.80764	7.3261	19.1765	5.20245e-06	0.000596289	5.05991	T
NCF1C	1.34167	10.4189	19.0698	5.35314e-06	0.000607907	5.02929	T
CCL4	2.95025	8.40459	19.0518	5.37904e-06	0.000607907	5.02411	T
B3GNT2	0.983438	10.9667	18.9934	5.46425e-06	0.000613249	5.00724	T
MCAT	1.23313	10.3223	18.8505	5.67939e-06	0.000632997	4.96575	T
TBXAS1	-1.48186	9.28821	-18.7475	5.8408e-06	0.000646529	4.9356	T
LOC429518	-0.984573	10.5141	-18.7153	5.89252e-06	0.000647816	4.92611	T
DENND2C	-1.17713	8.17837	-18.6462	6.00492e-06	0.000655713	4.90576	T
XDH	-2.85901	6.70904	-18.5114	6.232e-06	0.000675942	4.86574	T
LOC428421	-1.15772	10.1453	-18.4494	6.33982e-06	0.000683052	4.84723	T
TSKU	0.899912	8.9779	18.4165	6.39784e-06	0.000684739	4.83739	T
TNIP2	1.25436	9.51556	18.3704	6.48042e-06	0.000686184	4.82354	T
AvBD3	1.45312	7.71643	18.3616	6.49627e-06	0.000686184	4.8209	T
THRB	1.39965	10.1436	18.3253	6.56233e-06	0.000688662	4.80997	T
MLKL	2.99854	6.98723	18.2854	6.63587e-06	0.000691886	4.79792	T
CD44	1.40184	11.0524	18.1685	6.85701e-06	0.00071036	4.76246	T
MXRA8	-1.55246	7.5524	-18.1175	6.95619e-06	0.000714126	4.74691	T
TRPC4	-1.54316	8.35172	-18.1045	6.98174e-06	0.000714126	4.74294	T
GGT2	1.97411	6.85434	18.0501	7.08988e-06	0.000716324	4.72629	T
TTYH3	-1.0495	9.34509	-18.0491	7.09187e-06	0.000716324	4.72598	T
ANXA2	0.912174	12.8764	17.9493	7.29577e-06	0.000731165	4.69525	T
LOC121110176	-3.4634	1.7317	-17.9332	7.32929e-06	0.000731165	4.69028	T
GBP	-1.08204	7.57129	-17.8634	7.47666e-06	0.00074129	4.66868	T
KCNQ2	-2.26503	4.0693	-17.8324	7.54339e-06	0.000743346	4.65903	T
CDH13	-1.92684	0.963419	-17.7682	7.68363e-06	0.000752576	4.63902	T
SLC22A16	-2.35626	2.69755	-17.6935	7.85065e-06	0.000757054	4.61565	T
FAM107B	1.08168	11.7157	17.6898	7.85909e-06	0.000757054	4.61448	T
SLC9A7	1.0048	10.2072	17.6851	7.86988e-06	0.000757054	4.61299	T
CSF2RA	-1.29368	9.40904	-17.6363	7.9816e-06	0.000762253	4.59766	T
COCH	-1.06538	13.9334	-17.6205	8.01825e-06	0.000762253	4.59267	T
PAG1	-0.968605	10.4498	-17.5485	8.18771e-06	0.00077381	4.56991	T
ADAMTS9	1.90019	7.64953	17.5165	8.26435e-06	0.000776512	4.55976	T
LAMP5	1.16466	9.97551	17.4839	8.34333e-06	0.000779402	4.5494	T
LOC121109031	2.16639	8.00415	17.4554	8.41307e-06	0.000780453	4.54033	T
CTSZ	-1.21456	10.5556	-17.4216	8.49675e-06	0.000780453	4.52955	T
FAM110A	0.87565	9.35032	17.4205	8.49946e-06	0.000780453	4.5292	T
MEF2D	-1.29915	11.0713	-17.379	8.60347e-06	0.000782715	4.51594	T
LOC769512	4.03956	2.01978	17.3721	8.62095e-06	0.000782715	4.51372	T
LFNG	-1.11319	10.7535	-17.3071	8.78742e-06	0.000793372	4.49286	T
LOC107053353	-1.09953	10.7272	-17.2716	8.88017e-06	0.000797291	4.4814	T
TF	-0.896995	11.911	-17.214	9.0327e-06	0.000806505	4.46281	T
GAB2	1.07273	8.72441	17.1914	9.09358e-06	0.00080748	4.45547	T
ADAMDEC1	-1.75185	7.11045	-17.1404	9.23249e-06	0.000815335	4.43891	T
C1S	1.37808	9.37491	17.0677	9.43483e-06	0.000826732	4.41521	T
FRMD4A	1.91836	6.99308	17.0574	9.46386e-06	0.000826732	4.41185	T
VIPR1	-0.938332	8.10757	-16.9449	9.78888e-06	0.000847545	4.3749	T
HPGDS	0.958659	8.56301	16.9387	9.807e-06	0.000847545	4.37287	T
OASL	-1.88158	8.51287	-16.8718	1.00069e-05	0.000855941	4.35077	T
CYP3A5	0.88024	12.6101	16.8708	1.00101e-05	0.000855941	4.35042	T
ABCA1	-1.08015	10.1522	-16.8005	1.02255e-05	0.000864861	4.32709	T
TPM1	1.29844	11.2044	16.795	1.02425e-05	0.000864861	4.32527	T
LOC417937	1.01429	7.59644	16.7815	1.02848e-05	0.000864861	4.32075	T
DNAJC5	1.21199	9.56364	16.7528	1.03747e-05	0.000864861	4.31121	T
NDRG1	-1.97966	6.81285	-16.7505	1.0382e-05	0.000864861	4.31044	T
BHLHE41	-1.20562	5.93356	-16.6584	1.06781e-05	0.000884635	4.27958	T
TNC	-1.87503	8.6066	-16.6429	1.07288e-05	0.000884635	4.27438	T
FKBP5	-1.65966	11.4869	-16.6258	1.07852e-05	0.000884773	4.26862	T
PAK3	0.827681	11.3106	16.5878	1.09116e-05	0.000890619	4.25583	T
SLC11A1	-0.993303	12.5496	-16.4804	1.1279e-05	0.000915978	4.21945	T
CST7	0.936115	8.47924	16.4419	1.14142e-05	0.000922222	4.20634	T
ACSS3	-1.58139	6.34768	-16.4116	1.1522e-05	0.000922222	4.19601	T
RNASE6	-1.68608	9.28222	-16.4102	1.15271e-05	0.000922222	4.19552	T
AOAH	-0.79487	8.62176	-16.3484	1.17508e-05	0.000931211	4.17437	T
CCR2	-1.57189	8.37701	-16.3473	1.17547e-05	0.000931211	4.17401	T
TM4SF19	2.27825	7.88526	16.3074	1.19019e-05	0.000938274	4.16031	T
TG	-1.76379	5.21028	-16.2411	1.21517e-05	0.000952235	4.13743	T
PIM3	1.27433	10.5618	16.2293	1.21968e-05	0.000952235	4.13335	T
DNASE1L3	-2.76027	6.12579	-16.1715	1.24203e-05	0.000965022	4.11334	T
C3AR1L	0.943195	8.76285	16.0657	1.28427e-05	0.000993066	4.07646	T
CD63	1.18514	12.6731	15.9688	1.32441e-05	0.00101923	4.04249	T
DUSP10	1.13179	10.256	15.8958	1.35568e-05	0.00103834	4.01672	T
LOC107054876	1.50429	2.41209	15.8603	1.3712e-05	0.00104528	4.00413	T
BCO1	-2.20398	6.85897	-15.8417	1.3794e-05	0.0010466	3.99755	T
CREB1	0.866955	11.0738	15.8149	1.39133e-05	0.00105072	3.98802	T
CEBPB	0.91148	13.7612	15.7513	1.42016e-05	0.00106264	3.96535	T
DUSP16	0.933758	8.95903	15.7406	1.42509e-05	0.00106264	3.96151	T
KLF4	-1.5058	8.97259	-15.7354	1.42747e-05	0.00106264	3.95967	T
CAPNS2	1.13981	6.75193	15.7104	1.43906e-05	0.00106264	3.95072	T
MSC	1.18248	9.10499	15.7084	1.44e-05	0.00106264	3.94999	T
JUN	1.05059	9.67664	15.6898	1.4487e-05	0.0010642	3.94333	T
FOXN3	-0.853802	10.8073	-15.6483	1.46837e-05	0.00107377	3.9284	T
TULP1	-2.12772	4.77492	-15.6011	1.4911e-05	0.00108548	3.91139	T
LACC1	1.21923	9.394	15.553	1.51471e-05	0.00109665	3.89398	T
LOC107050103	0.892497	11.8494	15.5423	1.52002e-05	0.00109665	3.89011	T
ST6GAL2	0.823799	10.8422	15.5186	1.53183e-05	0.00109707	3.88153	T
GDF11	2.04392	5.76119	15.514	1.53417e-05	0.00109707	3.87984	T
LOC422929	-2.78057	6.0351	-15.4463	1.56865e-05	0.00111679	3.85519	T
LOC124418343	1.70862	5.64519	15.4318	1.57617e-05	0.00111722	3.84989	T
CTSC	-1.02051	11.2077	-15.3964	1.59467e-05	0.00112539	3.83695	T
KIAA1549L	-1.68059	5.9668	-15.355	1.61665e-05	0.00113594	3.82176	T
CSGALNACT1	1.05089	9.7432	15.3335	1.62823e-05	0.00113912	3.81384	T
BTBD11	0.88761	10.9414	15.3053	1.64352e-05	0.00114486	3.80346	T
DPYSL4	0.90351	7.31156	15.1251	1.7455e-05	0.00121068	3.73658	T
LOC124416954	1.4297	10.296	15.0833	1.77018e-05	0.00122256	3.72096	T
ADIPOQ	1.56015	6.15525	15.0657	1.78074e-05	0.00122462	3.71434	T
MPZL1	-1.11498	9.18162	-15.0505	1.78987e-05	0.00122568	3.70866	T
LOC121107144	1.46703	7.0288	15.0225	1.80691e-05	0.00122698	3.69811	T
CDK8	0.808713	10.5774	15.0047	1.81784e-05	0.00122698	3.6914	T
QPCT	-0.835647	10.6324	-14.9997	1.82088e-05	0.00122698	3.68954	T
CD1C	-1.37871	8.4341	-14.9977	1.82214e-05	0.00122698	3.68877	T
FTH1	1.15991	15.2638	14.9641	1.84301e-05	0.00123589	3.67609	T
ARHGEF7L	-1.6304	4.39525	-14.9265	1.86669e-05	0.00124659	3.66188	T
LOC112533164	-3.14371	1.57186	-14.8548	1.91287e-05	0.00127164	3.63466	T
NRCAM	-0.949526	6.96614	-14.8441	1.91993e-05	0.00127164	3.63055	T
ACOD1	2.27711	4.48778	14.8312	1.92837e-05	0.00127202	3.62566	T
IFFO2	0.839777	9.55377	14.7887	1.95672e-05	0.00128547	3.60939	T
DAP	-0.851712	11.2773	-14.7665	1.97167e-05	0.00129	3.60091	T
NT5C2	0.768371	10.8002	14.7549	1.97958e-05	0.00129	3.59644	T
MAP2K6	-1.79025	8.28566	-14.6876	2.02605e-05	0.00131068	3.57056	T
LAMP1	-0.772636	13.6363	-14.679	2.03208e-05	0.00131068	3.56724	T
ZC3H12A	0.896262	13.0762	14.6739	2.03564e-05	0.00131068	3.56529	T
SNX22	-1.88454	6.65814	-14.6185	2.07507e-05	0.00133076	3.54388	T
AKR1B10	-0.963679	9.72218	-14.5924	2.09402e-05	0.00133761	3.53373	T
PLACL2	-1.612	9.28923	-14.5412	2.13166e-05	0.00134734	3.51384	T
TNIP1	0.963249	11.8198	14.5401	2.13245e-05	0.00134734	3.51342	T
RIPK3	1.17897	8.25325	14.5267	2.14248e-05	0.00134734	3.50818	T
PSTPIP1	-0.916565	11.1025	-14.5265	2.1426e-05	0.00134734	3.50812	T
CHST7	0.744505	10.9346	14.4032	2.23733e-05	0.00139671	3.45977	T
LAPTM5	-0.810991	12.2869	-14.393	2.24535e-05	0.00139671	3.45577	T
DUSP4	-0.786403	12.3272	-14.3908	2.24705e-05	0.00139671	3.45492	T
ALAS1	0.962247	9.13387	14.3588	2.27256e-05	0.00140716	3.44229	T
SDC2	2.32404	6.99097	14.3364	2.29062e-05	0.00140736	3.43344	T
STT3B	-0.74436	12.6124	-14.3242	2.30057e-05	0.00140736	3.42859	T
NT5E	0.860601	10.9254	14.3236	2.30104e-05	0.00140736	3.42836	T
CPAMD8	-1.56787	5.92433	-14.3154	2.30772e-05	0.00140736	3.42512	T
NHSL2	-0.830942	10.9629	-14.2862	2.33176e-05	0.00141496	3.41352	T
IKBKE	0.722758	11.0924	14.2703	2.34492e-05	0.00141496	3.40722	T
CD40	0.755436	11.0835	14.2586	2.35471e-05	0.00141496	3.40256	T
PLSCR1	0.877367	12.3422	14.2515	2.36069e-05	0.00141496	3.39972	T
CREB5	2.12194	4.96319	14.2444	2.36664e-05	0.00141496	3.3969	T
RXRA	-1.01486	8.1882	-14.2372	2.37271e-05	0.00141496	3.39403	T
NLRC5	0.781939	11.2163	14.2238	2.38407e-05	0.00141651	3.38869	T
TBX1	0.905303	8.77164	14.1645	2.43505e-05	0.00144149	3.36499	T
DEFB4A	1.25546	14.2806	14.1291	2.46614e-05	0.00145457	3.35078	T
PSD3	-0.898049	12.9126	-14.1033	2.48906e-05	0.00146275	3.34041	T
WNT4	-3.1791	2.86106	-14.0645	2.52408e-05	0.00147437	3.32475	T
LOC112531107	1.43219	4.33251	14.0588	2.52927e-05	0.00147437	3.32245	T
EPB41	-0.935754	9.30889	-14.0512	2.5362e-05	0.00147437	3.31938	T
HECTD2	0.89503	9.19394	14.022	2.56308e-05	0.00148466	3.30756	T
PDGFRB	-1.96026	6.03183	-14.002	2.58164e-05	0.00148638	3.29947	T
PSEN1	0.766088	9.40412	13.9979	2.58549e-05	0.00148638	3.2978	T
MMP27	4.57249	6.51975	13.983	2.5995e-05	0.00148638	3.29174	T
TXNRD1	-0.666086	10.3153	-13.9603	2.62099e-05	0.00148638	3.2825	T
EAF2	0.801244	7.20227	13.9575	2.62364e-05	0.00148638	3.28137	T
LOC428417	0.880819	9.95562	13.9477	2.63299e-05	0.00148638	3.27738	T
LOC124417780	1.24093	6.54132	13.9465	2.63412e-05	0.00148638	3.27689	T
MGAT3	-1.07526	10.3858	-13.9407	2.63964e-05	0.00148638	3.27455	T
NFKB1	0.730381	10.913	13.8944	2.68448e-05	0.00150638	3.25564	T
CNTF	0.96076	6.56087	13.8715	2.70704e-05	0.00151379	3.24625	T
CRIP1	-1.42389	11.9548	-13.8484	2.72995e-05	0.00151778	3.23678	T
PIK3AP1	0.759329	12.453	13.8438	2.73451e-05	0.00151778	3.23491	T
RNF223	1.12205	5.89634	13.8274	2.75102e-05	0.00151778	3.22815	T
CXorf21	1.10312	6.60789	13.8267	2.75174e-05	0.00151778	3.22786	T
LOC100858919	1.42664	10.3208	13.7897	2.78923e-05	0.00153131	3.21266	T
MME	1.04629	10.7848	13.7782	2.8011e-05	0.00153131	3.20789	T
HPD	0.916684	7.44234	13.7747	2.8047e-05	0.00153131	3.20645	T
ADM	4.36384	6.04342	13.7541	2.82596e-05	0.00153772	3.19797	T
LOC101749173	1.29601	6.78854	13.727	2.85438e-05	0.00154185	3.18672	T
EPHA2	0.717145	8.88744	13.7184	2.86337e-05	0.00154185	3.18319	T
LZTS3	1.24529	9.46787	13.7152	2.86677e-05	0.00154185	3.18185	T
DTNB	1.04735	8.76276	13.6928	2.89062e-05	0.00154185	3.17254	T
RIPK4	0.774008	8.95982	13.6857	2.89815e-05	0.00154185	3.16962	T
ICOSLG	1.52253	9.378	13.6845	2.89952e-05	0.00154185	3.16908	T
STX11	1.66904	7.95069	13.6837	2.90032e-05	0.00154185	3.16878	T
AvBD5	1.51826	10.388	13.6633	2.92237e-05	0.00154847	3.16026	T
NUMB	0.717964	10.973	13.6432	2.94412e-05	0.00155271	3.15193	T
MDFIC	-0.88193	11.7392	-13.6382	2.94958e-05	0.00155271	3.14984	T
LOC396098	-3.47886	2.78609	-13.5367	3.06316e-05	0.00160563	3.10734	T
RASSF10	3.14164	1.73749	13.5308	3.06999e-05	0.00160563	3.10483	T
LOC121110552	5.88403	3.43312	13.5194	3.08302e-05	0.00160693	3.10007	T
TLR2A	-1.39079	8.8854	-13.5036	3.1013e-05	0.00160693	3.09341	T
KLF2	-1.29156	9.18124	-13.5028	3.10229e-05	0.00160693	3.09305	T
NCOA4	-0.858558	10.7708	-13.4328	3.18493e-05	0.00163924	3.06345	T
F3	3.82606	1.91303	13.4327	3.18496e-05	0.00163924	3.06344	T
SELPLG	-0.899308	10.0026	-13.3867	3.24069e-05	0.00165654	3.04391	T
RUNX1	0.660105	12.8721	13.3856	3.24205e-05	0.00165654	3.04343	T
LOC121107627	0.892062	10.6058	13.3709	3.26011e-05	0.00165654	3.03718	T
LOC430422	-0.984019	6.76821	-13.3663	3.26576e-05	0.00165654	3.03523	T
CD86	1.31636	5.54253	13.363	3.26983e-05	0.00165654	3.03382	T
TPMT	0.749814	8.36255	13.3473	3.2893e-05	0.0016612	3.02713	T
LITAF	0.810353	8.79848	13.3339	3.30602e-05	0.00166444	3.02142	T
FOXK1	0.892898	10.7608	13.3209	3.32242e-05	0.0016675	3.01584	T
IL2RA	3.09035	6.33655	13.2768	3.37859e-05	0.00169045	2.99695	T
LOC101750889	-1.46475	4.87871	-13.2358	3.43177e-05	0.0017109	2.97934	T
TRAF7	0.650608	10.9978	13.229	3.44064e-05	0.0017109	2.97643	T
GPR158	1.19045	8.05121	13.1988	3.48057e-05	0.00172212	2.96341	T
DMBT1	-0.936945	12.0592	-13.1959	3.48453e-05	0.00172212	2.96213	T
LOC770612	-1.10951	11.5743	-13.1871	3.49629e-05	0.00172267	2.95833	T
NCF4	0.786303	9.57634	13.173	3.51512e-05	0.00172668	2.95227	T
LOC112532525	3.33174	1.66587	13.1475	3.54979e-05	0.00173843	2.9412	T
LOC121106534	1.11012	6.28481	13.128	3.57648e-05	0.00174621	2.93274	T
POLA1	-0.790517	10.7718	-13.0848	3.6364e-05	0.00177012	2.91399	T
IER5L	-1.0718	10.2933	-13.0519	3.68299e-05	0.00178741	2.89962	T
ALDH1A2	1.32852	8.13674	13.0071	3.74741e-05	0.00181323	2.88004	T
MAP4K4	0.820506	9.64287	12.9837	3.78169e-05	0.00181989	2.86975	T
TAAR1	3.68663	2.09332	12.9823	3.78369e-05	0.00181989	2.86916	T
FYB1	-0.855713	8.5477	-12.9367	3.85153e-05	0.00184702	2.84908	T
HMCN1	-0.87801	8.32402	-12.9138	3.88608e-05	0.00185681	2.83899	T
ZC3H7B	-0.755417	11.5607	-12.908	3.89492e-05	0.00185681	2.83642	T
PARVG	-1.0888	9.13857	-12.8946	3.91538e-05	0.00186107	2.8305	T
NTN4L	1.51197	8.64956	12.8712	3.95143e-05	0.00186605	2.82014	T
WIPF3	-0.694647	5.7032	-12.8696	3.9538e-05	0.00186605	2.81946	T
LOC422513	-1.18257	9.12565	-12.8514	3.98227e-05	0.00186605	2.81135	T
C19orf35	-1.53317	7.16268	-12.8445	3.99294e-05	0.00186605	2.80833	T
DPY19L1	-0.99192	9.5189	-12.8437	3.99422e-05	0.00186605	2.80796	T
IFITM5	-1.57485	5.1415	-12.8431	3.99513e-05	0.00186605	2.80771	T
TACC1	-0.7426	13.9334	-12.8353	4.0074e-05	0.00186638	2.80424	T
PRNP	0.686149	10.9944	12.8139	4.04132e-05	0.00187678	2.79471	T
UNC13B	1.13008	7.83376	12.7901	4.07946e-05	0.00188906	2.78409	T
LIMD2	-1.02535	8.86328	-12.7719	4.10872e-05	0.00189717	2.776	T
MAP2K3	0.761024	11.1164	12.7615	4.12574e-05	0.0018996	2.77133	T
DOK2	-0.84039	8.58791	-12.7386	4.16314e-05	0.00191138	2.76112	T
LYG2	2.01734	7.6786	12.7123	4.20674e-05	0.00192189	2.74933	T
NOCT	-0.712605	9.97943	-12.7019	4.22419e-05	0.00192189	2.74464	T
P2RY12	-0.999323	8.3633	-12.7015	4.22493e-05	0.00192189	2.74445	T
CALM1	0.706653	14.2358	12.6921	4.24065e-05	0.00192189	2.74024	T
NELFCD	-0.697291	11.996	-12.6878	4.24793e-05	0.00192189	2.7383	T
FERMT1	1.11424	8.05091	12.6822	4.25739e-05	0.00192189	2.73578	T
SESN1	-0.856689	10.5353	-12.6742	4.27102e-05	0.00192267	2.73216	T
LOC112531816	-1.84267	4.60624	-12.6503	4.31184e-05	0.00193566	2.7214	T
PLXNA1	0.693003	11.3105	12.6416	4.32671e-05	0.00193695	2.7175	T
EPSTI1	-0.643576	8.41057	-12.61	4.38166e-05	0.00195613	2.70321	T
SESN3	0.756308	9.78665	12.5662	4.45921e-05	0.00198397	2.68334	T
SHTN1	-2.54611	6.17283	-12.5609	4.46858e-05	0.00198397	2.68097	T
PLPP1	-0.813738	7.94104	-12.5523	4.48415e-05	0.00198543	2.67702	T
YPEL2	0.792474	8.75494	12.5332	4.51861e-05	0.00199522	2.66835	T
ELF3	2.98406	1.99203	12.5219	4.53924e-05	0.00199887	2.66319	T
LOC121107946	0.677026	9.43612	12.5101	4.56076e-05	0.00200289	2.65783	T
LOC426820	-0.851283	13.1664	-12.4965	4.58583e-05	0.00200776	2.65162	T
TNFRSF4	-0.925159	7.23922	-12.4906	4.5967e-05	0.00200776	2.64894	T
LY86	-0.953871	14.3003	-12.4576	4.65846e-05	0.00202926	2.63381	T
OAT	0.702579	11.1755	12.415	4.73953e-05	0.00205902	2.61425	T
BMPR2	-0.744288	9.84489	-12.3985	4.77132e-05	0.00206728	2.60667	T
PSMG2	1.1133	9.09395	12.3836	4.80029e-05	0.00207427	2.59981	T
SGPP1	0.808508	10.1233	12.3569	4.85269e-05	0.00208877	2.5875	T
TSPAN18	0.893137	8.40949	12.3505	4.86541e-05	0.00208877	2.58453	T
ADAM15	-1.4019	4.04377	-12.3387	4.88876e-05	0.00208877	2.5791	T
LIPA	-0.721649	10.7904	-12.3364	4.89347e-05	0.00208877	2.57801	T
SPATA5L1	0.781858	10.3483	12.3339	4.89849e-05	0.00208877	2.57684	T
CATHB1	2.79973	5.79809	12.3227	4.92085e-05	0.00209278	2.57168	T
SLC9A3R1	0.955106	12.6173	12.3014	4.96379e-05	0.002101	2.56182	T
BIK	1.37543	7.0651	12.3003	4.96616e-05	0.002101	2.56128	T
IL18BP	4.04684	3.4931	12.2842	4.99899e-05	0.00210937	2.5538	T
PLEKHA2	-0.61632	10.3166	-12.2655	5.03736e-05	0.00211614	2.54513	T
PLEKHA7	-0.862995	9.54681	-12.2636	5.04124e-05	0.00211614	2.54425	T
AEBP2	0.800518	9.97166	12.2552	5.05872e-05	0.00211771	2.54032	T
DENND4A	1.09028	10.5799	12.2462	5.0774e-05	0.00211771	2.53614	T
MAP6	-0.814497	7.59327	-12.2375	5.09561e-05	0.00211771	2.53208	T
TUBB1	-1.07471	7.57698	-12.2367	5.09738e-05	0.00211771	2.53168	T
MEIS1	1.06616	7.8337	12.2215	5.12935e-05	0.00212346	2.52458	T
INHBB	1.24571	6.37829	12.2106	5.15228e-05	0.00212346	2.51952	T
PPFIA4	-0.877183	5.93217	-12.2084	5.15698e-05	0.00212346	2.51849	T
EDNRB	-0.920637	9.51042	-12.2052	5.16379e-05	0.00212346	2.51699	T
LOC121111413	0.715599	5.98626	12.1733	5.23217e-05	0.00214612	2.50205	T
USP41	-0.758819	11.0587	-12.1591	5.26304e-05	0.00215217	2.49537	T
NT5DC2	-0.775241	10.9152	-12.1496	5.28368e-05	0.00215217	2.49093	T
PPP1R7	0.76358	10.841	12.1477	5.28784e-05	0.00215217	2.49003	T
SOCS2	0.821709	10.1049	12.1421	5.30019e-05	0.00215217	2.48738	T
CMTM3	-0.756912	9.86169	-12.1296	5.32764e-05	0.0021579	2.48152	T
LBH	1.73435	6.89453	12.1055	5.38122e-05	0.00217085	2.47015	T
DTL	-0.718812	8.75805	-12.1032	5.3865e-05	0.00217085	2.46904	T
RADIL	-0.997785	5.2831	-12.0697	5.46208e-05	0.00219584	2.45321	T
TAGLN2	0.875892	12.2665	12.0606	5.48265e-05	0.00219864	2.44894	T
MAP3K8	1.06368	8.29953	12.0523	5.50169e-05	0.00219932	2.445	T
GPR141	-1.86275	6.48549	-12.048	5.51156e-05	0.00219932	2.44296	T
FAM46C	-1.08422	9.3263	-12.0406	5.52855e-05	0.00220066	2.43946	T
VCL	0.66816	10.2834	12.0207	5.5749e-05	0.00221366	2.42998	T
SPTBN5	-3.01192	3.74246	-12.0136	5.5914e-05	0.00221477	2.42661	T
MAP3K14	0.779296	11.8272	11.9944	5.63652e-05	0.00222718	2.41748	T
RIN2	-0.715058	11.1214	-11.9628	5.71172e-05	0.00225139	2.40241	T
PIEZO1	0.625022	12.6845	11.9321	5.78587e-05	0.00227507	2.38775	T
RAD51B	0.861279	8.46714	11.9007	5.86295e-05	0.00229979	2.3727	T
RFX2	-1.27092	7.55745	-11.8669	5.94722e-05	0.00232282	2.35646	T
LOC101752273	-2.1345	1.06725	-11.8657	5.95043e-05	0.00232282	2.35585	T
ITGB5	-0.90617	10.2083	-11.8577	5.9705e-05	0.00232504	2.35202	T
TMEM268	-1.3334	7.09853	-11.84	6.01535e-05	0.00233631	2.34351	T
ARID5A	1.30092	8.69457	11.8323	6.03504e-05	0.00233631	2.33979	T
LOC121109170	1.64302	6.68718	11.8293	6.0428e-05	0.00233631	2.33832	T
LOC101751866	1.14375	7.65909	11.8177	6.0726e-05	0.00233722	2.33273	T
SH3KBP1	-0.653755	12.2266	-11.8117	6.08824e-05	0.00233722	2.3298	T
LTA4H	-0.681748	12.1788	-11.8061	6.10274e-05	0.00233722	2.32709	T
TRAF3	0.96694	11.0113	11.806	6.10301e-05	0.00233722	2.32704	T
KIF24	-0.58541	8.37826	-11.7899	6.14493e-05	0.00234771	2.31925	T
CARD11	-1.29434	7.24628	-11.7775	6.17728e-05	0.00235137	2.31328	T
LOC124417086	1.07929	7.33183	11.7751	6.18361e-05	0.00235137	2.31211	T
LOC420965	-1.03194	6.19626	-11.7655	6.20904e-05	0.0023555	2.30744	T
CNOT6	-0.605598	10.0412	-11.7549	6.23735e-05	0.0023607	2.30226	T
EXD2	0.730237	8.68366	11.7476	6.25679e-05	0.00236252	2.29872	T
ASS1	-0.821289	11.8837	-11.742	6.27171e-05	0.00236264	2.29601	T
RCSD1	-0.613231	10.0542	-11.7298	6.30457e-05	0.002364	2.29006	T
PTCHD3	0.937151	8.82873	11.7298	6.30458e-05	0.002364	2.29006	T
GK2	0.751873	9.64919	11.7016	6.38112e-05	0.00238561	2.27632	T
LOC107050168	-2.1104	5.46974	-11.6977	6.39173e-05	0.00238561	2.27443	T
ATP6V1G3	-0.824827	10.9874	-11.6833	6.43129e-05	0.00238948	2.2674	T
TRAF1	1.47269	7.9974	11.6832	6.43168e-05	0.00238948	2.26733	T
IFNGR2	0.829335	9.89225	11.6699	6.46848e-05	0.00239764	2.26083	T
TGM6	1.22718	7.03767	11.6631	6.48752e-05	0.0023992	2.25749	T
MAOA	-1.22002	6.0637	-11.6541	6.51254e-05	0.00240275	2.2531	T
LOC107052314	0.920889	5.40294	11.649	6.52688e-05	0.00240275	2.2506	T
TOMM7	0.723658	9.27633	11.6381	6.55779e-05	0.00240865	2.24522	T
LAMB3	3.19663	3.55443	11.6191	6.61168e-05	0.0024209	2.23589	T
PDE7A	-0.617699	10.4832	-11.602	6.66049e-05	0.0024209	2.22751	T
CMKLR1	-0.623864	9.62247	-11.5931	6.68621e-05	0.0024209	2.22312	T
BHLHE40	0.972499	11.5441	11.5916	6.69056e-05	0.0024209	2.22238	T
P2RY2	-0.732829	8.57237	-11.5901	6.69508e-05	0.0024209	2.22161	T
PDE4C	1.1428	8.39088	11.5873	6.703e-05	0.0024209	2.22026	T
LPCAT2	0.76789	9.98904	11.5838	6.71313e-05	0.0024209	2.21854	T
ATP8B4	-0.700391	9.14013	-11.5815	6.72002e-05	0.0024209	2.21737	T
TM4SF1a	1.59249	3.95404	11.57	6.75364e-05	0.0024209	2.21169	T
PELI2	1.07008	8.45376	11.5697	6.75423e-05	0.0024209	2.21159	T
SIPA1L2	-1.15496	7.60783	-11.5692	6.75594e-05	0.0024209	2.2113	T
SNTB1	0.649819	9.95892	11.5394	6.84379e-05	0.00244696	2.19657	T
GVINP1	-2.05749	7.42291	-11.5106	6.9299e-05	0.0024707	2.18232	T
BCL11A	-0.614354	8.27689	-11.5027	6.95387e-05	0.0024707	2.17839	T
NGEF	0.948442	7.21018	11.502	6.95606e-05	0.0024707	2.17803	T
MAFK	0.646917	11.3994	11.4703	7.05294e-05	0.00249935	2.16226	T
PROX2	-0.944082	5.33343	-11.4655	7.06765e-05	0.00249935	2.15988	T
PRDX1	0.678721	13.5497	11.4514	7.11146e-05	0.00250663	2.15284	T
UNC93B1	-1.08884	9.21625	-11.4489	7.11927e-05	0.00250663	2.15159	T
LOC107049021	-1.7904	2.56668	-11.3993	7.27571e-05	0.00255615	2.1268	T
CTSH	-0.771352	12.1775	-11.3808	7.33519e-05	0.00257145	2.11751	T
LRP1	-1.11909	14.9769	-11.3596	7.40396e-05	0.00258293	2.10686	T
BAIAP2L1	0.659204	8.3825	11.3588	7.40657e-05	0.00258293	2.10646	T
FGFR3	-1.1231	9.46938	-11.3528	7.42602e-05	0.00258293	2.10347	T
ST8SIA4	-0.711597	9.97221	-11.3511	7.43187e-05	0.00258293	2.10257	T
LOC121107460	2.34065	3.68725	11.3458	7.44905e-05	0.00258335	2.09993	T
MECR	-1.04019	9.51468	-11.3354	7.48333e-05	0.00258524	2.0947	T
KCNAB1	3.78892	5.34579	11.3345	7.48649e-05	0.00258524	2.09421	T
LOC121110452	1.46259	7.20422	11.3253	7.51676e-05	0.00259016	2.08961	T
FYN	0.592549	10.889	11.3011	7.59783e-05	0.00261252	2.07737	T
TMPO	-0.686174	12.15	-11.295	7.61824e-05	0.00261398	2.07431	T
ATP6V0D2	-1.86992	6.44295	-11.2893	7.63764e-05	0.00261508	2.0714	T
MYO1F	-0.895255	10.152	-11.2782	7.67529e-05	0.00261892	2.06579	T
LOC121113271	3.42185	5.29968	11.2765	7.68125e-05	0.00261892	2.06491	T
LOC124417150	-3.35072	1.94161	-11.219	7.88018e-05	0.00267916	2.03572	T
RPS6KB1	0.637875	10.8487	11.2159	7.8911e-05	0.00267916	2.03413	T
VASH1	-0.611918	12.7303	-11.1977	7.95548e-05	0.00268674	2.02486	T
CRY2	0.55304	9.54463	11.1963	7.96028e-05	0.00268674	2.02417	T
CEP76	0.696312	8.156	11.1955	7.96329e-05	0.00268674	2.02374	T
LOC422214	0.577998	10.2657	11.1786	8.02348e-05	0.00269859	2.01514	T
LOC121107290	-0.688643	8.45724	-11.1763	8.03182e-05	0.00269859	2.01395	T
MED27	0.678258	9.57218	11.1639	8.0765e-05	0.00270402	2.00762	T
FAM65B	-1.19362	7.52685	-11.1574	8.10015e-05	0.00270402	2.00428	T
GDI1	-0.578003	12.4715	-11.1542	8.11175e-05	0.00270402	2.00264	T
FMNL1	0.556925	11.636	11.1533	8.1149e-05	0.00270402	2.0022	T
NEK6	0.612082	11.4966	11.127	8.21141e-05	0.00273055	1.98869	T
C10H15ORF48	0.883219	9.49869	11.1178	8.24558e-05	0.00273628	1.98395	T
CA12	1.20266	8.53651	11.1107	8.27197e-05	0.00273941	1.9803	T
HOXD3	0.729937	7.74275	11.0998	8.31267e-05	0.00274726	1.97469	T
PPM1L	-0.654802	8.17253	-11.0925	8.33984e-05	0.00275008	1.97096	T
LOC769329	0.807554	9.88786	11.0865	8.36248e-05	0.00275008	1.96787	T
LOC421285	2.01767	5.72202	11.0759	8.40246e-05	0.00275008	1.96242	T
PAPLN	0.769055	9.05826	11.0759	8.40276e-05	0.00275008	1.96238	T
TRPM2	0.907552	11.147	11.0749	8.40629e-05	0.00275008	1.9619	T
ADORA2B	0.663254	12.903	11.0691	8.42838e-05	0.00275174	1.9589	T
CFD	5.04056	3.39769	11.03	8.579e-05	0.00278967	1.93865	T
TIMD4	-0.833485	6.84947	-11.0299	8.5791e-05	0.00278967	1.93864	T
FNBP1	-0.544835	11.502	-11.0166	8.63114e-05	0.00280096	1.93173	T
GJC3	0.746679	11.2977	11.0039	8.68087e-05	0.00280834	1.92516	T
LAMB2	-0.723842	12.226	-11.002	8.68863e-05	0.00280834	1.92414	T
SPI1	0.63929	12.7333	10.9909	8.73247e-05	0.00281687	1.91839	T
DPYSL2	-0.711316	9.62973	-10.9734	8.80223e-05	0.00283172	1.90929	T
LCLAT1	0.636356	10.982	10.9687	8.82112e-05	0.00283172	1.90684	T
RALGPS2	0.54841	9.34239	10.9624	8.84646e-05	0.00283172	1.90356	T
BNIP3	-0.568986	10.05	-10.9619	8.84858e-05	0.00283172	1.90329	T
ACVR2A	0.692088	9.41573	10.9566	8.86976e-05	0.00283289	1.90055	T
PDLIM5	0.6813	11.2123	10.9476	8.90636e-05	0.00283754	1.89584	T
HMGB1	-0.84234	13.2322	-10.9444	8.91943e-05	0.00283754	1.89417	T
C26H6ORF222	-1.00963	4.93906	-10.9386	8.94306e-05	0.00283947	1.89114	T
DOCK11	0.557739	11.826	10.9317	8.97133e-05	0.00284286	1.88753	T
ENTPD2	-0.639417	10.9941	-10.9273	8.98922e-05	0.00284295	1.88526	T
MMP1	4.52579	5.26682	10.9112	9.05547e-05	0.00285716	1.87686	T
LCP1	0.642791	13.026	10.9079	9.06951e-05	0.00285716	1.87509	T
MPP1	-0.771462	10.975	-10.8975	9.11271e-05	0.00286519	1.86965	T
TPD52L2	0.627573	10.8547	10.8895	9.14598e-05	0.00287006	1.86548	T
SUCNR1	-1.09849	10.92	-10.8835	9.17119e-05	0.0028724	1.86233	T
UBASH3B	-0.726155	10.2951	-10.8648	9.25052e-05	0.00289164	1.85248	T
IDH1	-0.605691	9.71666	-10.8581	9.27884e-05	0.00289489	1.84899	T
AP2A2	-0.621984	11.0218	-10.8534	9.29915e-05	0.00289496	1.84648	T
DCTD	-0.835441	8.03674	-10.8496	9.31527e-05	0.00289496	1.8445	T
TREM2	-3.37625	6.60612	-10.8455	9.33279e-05	0.00289496	1.84235	T
ELMO1	-0.708273	11.1302	-10.8329	9.38714e-05	0.00290624	1.83571	T
LOC121110905	3.16507	1.7492	10.8135	9.47135e-05	0.0029267	1.82549	T
GADD45G	-0.972037	9.06039	-10.7977	9.54087e-05	0.00294256	1.81712	T
FAM187A	3.40839	1.70419	10.7793	9.62254e-05	0.00296209	1.80737	T
LOC124417568	0.916834	9.98033	10.7703	9.6627e-05	0.0029688	1.8026	T
LOC121107141	1.51242	10.9206	10.7594	9.71159e-05	0.00297816	1.79683	T
ATP2C2	-1.03773	6.93246	-10.7515	9.74692e-05	0.00298333	1.79267	T
ARFGEF3	-1.07075	10.3342	-10.7453	9.77529e-05	0.00298636	1.78935	T
VAV2	0.696577	8.68503	10.7403	9.79798e-05	0.00298723	1.78669	T
RGS3	0.70741	8.49305	10.7365	9.8151e-05	0.00298723	1.78469	T
GAA2	0.653491	12.1258	10.7139	9.91895e-05	0.00301022	1.77264	T
CMPK1	0.529116	11.716	10.7095	9.93942e-05	0.00301022	1.77028	T
C12orf75	1.2872	8.7969	10.7069	9.95151e-05	0.00301022	1.76889	T
CTNND1	0.636568	10.7635	10.7015	9.97624e-05	0.00301022	1.76605	T
HSF2BP	-0.742097	6.68352	-10.6999	9.98379e-05	0.00301022	1.76519	T
SCAF8	-0.563859	10.543	-10.6752	0.000100996	0.00303947	1.75198	T
F5	-1.51322	10.3312	-10.6553	0.000101938	0.0030621	1.74136	T
STEAP3	0.76769	9.09749	10.6448	0.00010244	0.0030715	1.73572	T
PLCB2	-1.27544	8.0803	-10.6391	0.000102716	0.00307405	1.73265	T
LMNB1	-0.571595	11.0305	-10.6323	0.000103041	0.00307809	1.72902	T
MCF2L	-1.87116	5.37661	-10.6155	0.000103861	0.00309685	1.71995	T
FCMAR	5.85173	4.81567	10.6079	0.000104229	0.0031021	1.7159	T
SHH	2.39459	2.75816	10.5856	0.00010533	0.00312596	1.70386	T
ALOX5AP	1.21074	9.71172	10.5838	0.000105417	0.00312596	1.70291	T
ARHGAP24	1.87983	4.31149	10.5715	0.000106031	0.00313114	1.69626	T
ACSS2	-0.654298	11.4539	-10.5714	0.000106033	0.00313114	1.69624	T
STAT1	-0.748772	10.0234	-10.5686	0.000106173	0.00313114	1.69473	T
CCLL4	2.26576	5.92585	10.5569	0.000106764	0.00314282	1.68837	T
PCBP3	-0.632751	5.37151	-10.5404	0.000107595	0.00316154	1.67948	T
KANK4	-0.544575	9.11732	-10.5282	0.000108221	0.00317414	1.67284	T
CEBPA	0.876347	10.5718	10.5158	0.000108855	0.00318696	1.66615	T
STAB1	-0.863915	10.3021	-10.4993	0.00010971	0.00319669	1.65718	T
VMP1	0.654604	12.128	10.4987	0.000109744	0.00319669	1.65682	T
MTSS1	-0.615213	9.79558	-10.498	0.000109781	0.00319669	1.65644	T
HMGN4	-0.637615	12.258	-10.474	0.000111037	0.00322746	1.6434	T
B4GALNT3	-4.85853	2.94343	-10.4492	0.000112357	0.00325997	1.62985	T
TPST2	-1.13072	9.08185	-10.4303	0.000113372	0.00326724	1.61955	T
LOC121108850	1.19214	6.93689	10.4303	0.000113372	0.00326724	1.61954	T
GSL	0.723207	10.9537	10.4265	0.000113576	0.00326724	1.61749	T
CAV2	-0.657392	9.44925	-10.4239	0.00011372	0.00326724	1.61603	T
ITM2A	-0.606632	12.964	-10.4191	0.000113982	0.00326724	1.6134	T
CYBB	0.646159	13.1496	10.4169	0.000114098	0.00326724	1.61223	T
CD180	-1.66849	7.21585	-10.4139	0.000114263	0.00326724	1.61058	T
FOXC1	1.08119	8.30177	10.411	0.000114424	0.00326724	1.60896	T
ZSWIM7	1.18384	10.312	10.4109	0.000114427	0.00326724	1.60893	T
GPER1	-0.871053	7.84527	-10.3884	0.000115668	0.00329344	1.59656	T
ANXA1	-1.18557	6.22896	-10.3868	0.000115752	0.00329344	1.59572	T
EDA	2.64	5.75186	10.3806	0.0001161	0.00329752	1.59229	T
CYBC1	0.541657	11.4138	10.3704	0.000116668	0.00330783	1.58669	T
UVRAG	-0.622711	10.4357	-10.3561	0.000117473	0.00332482	1.57881	T
CD36	-0.720337	6.45405	-10.3456	0.000118065	0.00333575	1.57304	T
ARHGEF39	-0.727051	8.88274	-10.3305	0.000118925	0.00335419	1.56471	T
SLC1A6	-0.993864	6.62253	-10.3189	0.000119595	0.00336719	1.55827	T
TMEM204	0.976237	2.29799	10.3127	0.000119948	0.00337128	1.55489	T
FLI1	-0.52234	11	-10.2978	0.000120815	0.00338974	1.54663	T
MN1	-0.901313	9.78395	-10.2913	0.000121197	0.0033922	1.54301	T
LOC107052289	-0.934848	6.06071	-10.2891	0.000121323	0.0033922	1.54182	T
LOC101750640	-3.14543	1.83896	-10.2822	0.00012173	0.00339772	1.53797	T
SCD	0.551301	11.7253	10.2719	0.000122336	0.00340876	1.53227	T
ENDOUL	3.84976	4.7939	10.2663	0.000122668	0.00341213	1.52916	T
SPNS3	-0.781391	8.9088	-10.2553	0.000123323	0.00342444	1.52306	T
ITSN1	-0.818981	9.71699	-10.25	0.000123642	0.00342742	1.52009	T
RAB7B	0.594019	6.5513	10.2457	0.000123902	0.00342874	1.51768	T
B3GNT4	-1.24978	6.5012	-10.2257	0.000125106	0.00345614	1.50659	T
ECT2	-0.52459	9.55356	-10.2189	0.000125521	0.00346168	1.50279	T
LOC124416941	-0.558337	11.8543	-10.2047	0.000126392	0.0034716	1.49485	T
CYB5R1	0.848244	9.96825	10.201	0.000126621	0.0034716	1.49278	T
TMEM171	0.799989	9.04107	10.1998	0.000126695	0.0034716	1.49211	T
C14orf159	0.861127	7.48679	10.1977	0.000126824	0.0034716	1.49094	T
ENTPD1	-0.944067	7.93297	-10.1954	0.000126966	0.0034716	1.48965	T
CCNDBP1	0.833556	10.8139	10.1921	0.00012717	0.0034716	1.48781	T
CADPS	0.624001	11.855	10.1868	0.000127503	0.00347482	1.48481	T
RNF130	0.618907	13.3113	10.1776	0.000128076	0.003484	1.47966	T
NABP1	-0.844691	9.01742	-10.1745	0.000128271	0.003484	1.47792	T
CDKN2A	-0.564045	11.4884	-10.1599	0.000129189	0.00350305	1.46973	T
AMOTL1	0.887054	8.67434	10.1438	0.000130207	0.00352474	1.46072	T
SH3TC2	-0.574815	10.756	-10.1327	0.000130918	0.00353164	1.45447	T
KLHL14	0.700749	8.65944	10.1318	0.000130973	0.00353164	1.45399	T
GRK4	-0.657322	12.5099	-10.1296	0.000131117	0.00353164	1.45273	T
MARCO	-1.1851	6.10978	-10.1227	0.000131561	0.00353769	1.44885	T
MATK	-0.934944	9.12517	-10.1162	0.000131983	0.00354298	1.44516	T
BORCS6	1.0424	9.46781	10.1129	0.000132196	0.00354298	1.44332	T
TRIM25	-0.736307	9.59331	-10.1091	0.000132444	0.00354377	1.44116	T
SPNS2	-1.08482	5.71823	-10.1054	0.00013268	0.00354421	1.43912	T
SOCS3	0.937126	9.86225	10.1008	0.000132984	0.00354646	1.43649	T
UGP2	0.651746	12.3597	10.0873	0.000133867	0.00356412	1.4289	T
HPGD	-2.62992	1.58121	-10.0803	0.000134327	0.0035705	1.42496	T
ADAM23	-0.524036	10.099	-10.0638	0.000135424	0.0035932	1.41562	T
HIVEP3	-0.695637	9.9355	-10.0608	0.000135626	0.0035932	1.41391	T
GPRIN3	-0.793447	10.2149	-10.0443	0.000136737	0.0036167	1.40454	T
KMT5B	1.07039	9.45408	10.0275	0.000137874	0.00363806	1.39503	T
HIST1H4D	1.62766	2.85927	10.0243	0.000138094	0.00363806	1.39319	T
TMEM119	-0.904672	8.28845	-10.0225	0.00013822	0.00363806	1.39215	T
HOXD10	1.51232	8.94966	10.0172	0.000138583	0.0036417	1.38913	T
PRSS23	0.959731	8.63689	10.0011	0.000139693	0.0036649	1.37997	T
SAMD9L	-2.27767	6.92372	-9.99648	0.000140012	0.00366732	1.37735	T
C10orf128	-1.10196	7.26968	-9.97786	0.000141312	0.0036927	1.36673	T
PECAM1	-1.4322	10.5722	-9.97607	0.000141438	0.0036927	1.36571	T
SUSD6	0.531368	11.8008	9.96632	0.000142126	0.00370466	1.36014	T
GDPD5	-0.921142	8.382	-9.95692	0.000142792	0.00371604	1.35477	T
TPPP	1.78198	5.2423	9.95132	0.000143191	0.00372043	1.35156	T
NRTN	1.3889	6.92904	9.93402	0.000144431	0.00374253	1.34165	T
LOC107053571	1.7225	5.80092	9.93249	0.000144542	0.00374253	1.34077	T
KAT2B	0.722716	10.0028	9.92841	0.000144836	0.00374253	1.33844	T
TTC28	0.639615	11.8506	9.92659	0.000144968	0.00374253	1.33739	T
SLC17A9	0.660641	9.61919	9.92269	0.000145251	0.00374385	1.33515	T
CALM2	-0.52017	13.2503	-9.91074	0.00014612	0.00374962	1.3283	T
TCN2	-0.476165	8.39931	-9.91022	0.000146159	0.00374962	1.32799	T
SELENOP1	-1.38571	5.76166	-9.91005	0.000146171	0.00374962	1.3279	T
MMP10	3.00838	1.50419	9.90171	0.000146782	0.00375106	1.3231	T
LOC124417891	3.58511	5.32832	9.90071	0.000146856	0.00375106	1.32252	T
ABCC5	0.546039	11.0976	9.89979	0.000146923	0.00375106	1.322	T
ANGPT1	-2.2066	4.76418	-9.89553	0.000147237	0.00375147	1.31955	T
ORAI3	0.721904	9.48961	9.89323	0.000147407	0.00375147	1.31822	T
CDX4	-1.85975	0.929877	-9.88853	0.000147754	0.00375147	1.31552	T
NPL	-1.25587	6.20833	-9.887	0.000147867	0.00375147	1.31464	T
LOC121109707	-1.41436	3.72208	-9.86526	0.000149489	0.00378666	1.3021	T
PSD	0.941193	8.31863	9.85281	0.000150426	0.00380445	1.29492	T
UPRT	0.658561	10.244	9.84509	0.000151012	0.00380466	1.29045	T
LOC107052067	-1.71483	2.6967	-9.84354	0.000151129	0.00380466	1.28956	T
PELI3	0.539563	9.45805	9.84339	0.000151141	0.00380466	1.28947	T
LOC101751974	0.955073	8.11036	9.83385	0.000151869	0.00381703	1.28395	T
GALM	-0.746825	8.84761	-9.8226	0.000152732	0.00383278	1.27743	T
FARP1	-0.652265	9.32826	-9.81423	0.000153378	0.00383872	1.27258	T
JUND	0.880683	11.563	9.80969	0.00015373	0.00383872	1.26995	T
HOXD8	0.810647	9.91622	9.80829	0.000153838	0.00383872	1.26914	T
COL27A1	-1.49002	5.69654	-9.80644	0.000153982	0.00383872	1.26806	T
MYCT1	-1.0667	7.15611	-9.8042	0.000154157	0.00383872	1.26676	T
C11orf87	0.760442	10.4991	9.79489	0.000154883	0.00385087	1.26135	T
CDKN2C	-0.81248	10.1405	-9.78896	0.000155349	0.00385651	1.2579	T
FAM20C	0.669651	9.74199	9.77388	0.000156538	0.0038651	1.24913	T
GPR27	0.727567	10.0881	9.77272	0.00015663	0.0038651	1.24846	T
IL12B	0.55356	7.22402	9.76895	0.00015693	0.0038651	1.24626	T
CCDC146	-3.65079	2.09164	-9.76521	0.000157227	0.0038651	1.24408	T
EPB41L3	-0.971995	8.29594	-9.76276	0.000157423	0.0038651	1.24265	T
AHDC1	0.643874	9.39254	9.76118	0.000157549	0.0038651	1.24173	T
PTMS	-0.684409	11.3738	-9.75576	0.000157983	0.0038651	1.23857	T
SYNGAP1	0.940474	10.8816	9.75525	0.000158024	0.0038651	1.23827	T
LOC107054808	0.792929	8.24886	9.75493	0.000158049	0.0038651	1.23809	T
WHRN	3.05308	1.6932	9.75262	0.000158234	0.0038651	1.23674	T
MAPKAPK2	0.50237	11.1111	9.75149	0.000158325	0.0038651	1.23608	T
IL1RL2	0.612587	8.91266	9.74444	0.000158893	0.00387311	1.23197	T
MANBA	-0.8007	8.82342	-9.73945	0.000159296	0.00387709	1.22905	T
ATP10D	-0.728562	8.29669	-9.73453	0.000159695	0.00388095	1.22618	T
LOC101751615	-0.869892	8.28944	-9.71334	0.000161426	0.00391713	1.21378	T
CAMK2G	0.503542	11.4968	9.70168	0.000162388	0.00392174	1.20695	T
LOC107053124	1.3252	6.49376	9.69659	0.00016281	0.00392174	1.20396	T
PXN	0.664879	10.7714	9.68685	0.000163622	0.00392174	1.19824	T
LOC430700	-1.80892	0.904459	-9.68554	0.000163731	0.00392174	1.19747	T
LOC101748673	2.89106	3.65756	9.68529	0.000163752	0.00392174	1.19732	T
ATP1B1	-0.721658	9.61405	-9.6852	0.000163759	0.00392174	1.19727	T
SENP5	0.488586	10.5705	9.68385	0.000163873	0.00392174	1.19648	T
LOC121111415	-1.63399	7.45081	-9.68232	0.000164001	0.00392174	1.19558	T
SAMD4A	0.843733	8.03441	9.68011	0.000164186	0.00392174	1.19428	T
QRSL1	0.730567	7.28184	9.67968	0.000164222	0.00392174	1.19403	T
ZNF385B	-1.39354	6.47403	-9.67892	0.000164286	0.00392174	1.19358	T
TFRC	0.59026	10.6835	9.67601	0.00016453	0.00392178	1.19187	T
KCNMA1	-1.0064	8.07496	-9.6666	0.000165323	0.00393213	1.18634	T
TMEM140	-1.29972	7.44608	-9.6651	0.000165451	0.00393213	1.18545	T
MGST1	0.690599	12.1066	9.66109	0.00016579	0.0039329	1.1831	T
ADD3	0.605435	10.572	9.65898	0.00016597	0.0039329	1.18185	T
SEPTIN14	0.91921	9.45714	9.64982	0.00016675	0.00394561	1.17645	T
FGFR2	0.747391	7.18177	9.63798	0.000167765	0.00396382	1.16947	T
CREM	0.959727	8.07716	9.62564	0.000168832	0.00398319	1.16219	T
TMEM132D	-0.614428	9.46555	-9.61681	0.000169599	0.00399547	1.15697	T
SLCO4A1	0.499217	11.206	9.60341	0.000170771	0.00401179	1.14904	T
CKB	0.735211	12.1235	9.60171	0.000170921	0.00401179	1.14803	T
SCNN1D	0.64193	8.96328	9.6004	0.000171037	0.00401179	1.14726	T
TEX2	0.699433	10.4895	9.59106	0.000171861	0.00402529	1.14172	T
LOC121108053	3.59205	2.34477	9.57546	0.000173249	0.00405192	1.13247	T
ZHX2	0.563048	8.29019	9.56792	0.000173924	0.00406183	1.12799	T
SH2B1	-1.05261	7.96628	-9.56473	0.000174211	0.00406267	1.1261	T
PTPN13	-0.840961	8.60042	-9.55231	0.000175333	0.00408294	1.11871	T
ENPP2	2.38253	5.69914	9.54948	0.00017559	0.00408303	1.11703	T
FAM20B	0.786196	11.0298	9.54636	0.000175873	0.00408375	1.11517	T
UAP1L1	-0.458991	11.4525	-9.5434	0.000176143	0.00408415	1.1134	T
LOC770026	4.79746	3.01247	9.53723	0.000176707	0.00408855	1.10973	T
PKN2	-0.659093	10.6499	-9.53578	0.000176839	0.00408855	1.10887	T
GRIA1	-1.26787	6.05372	-9.52837	0.00017752	0.00409594	1.10445	T
BTK	-0.674975	9.85605	-9.52678	0.000177666	0.00409594	1.1035	T
CIB2	0.691985	8.32629	9.51355	0.00017889	0.00411828	1.0956	T
TGFBI	0.563994	11.5009	9.49924	0.000180224	0.00414077	1.08705	T
LOC124417349	1.20589	6.66812	9.49758	0.000180379	0.00414077	1.08606	T
ACTN1	0.563561	12.7527	9.48356	0.0001817	0.00416518	1.07766	T
RRM2	-0.536242	11.9205	-9.47323	0.000182679	0.0041799	1.07147	T
INIP	-0.544004	9.93494	-9.47134	0.000182859	0.0041799	1.07034	T
GDF15	0.924174	8.53427	9.46465	0.000183499	0.00418767	1.06632	T
CEP83	-0.677511	8.2056	-9.46236	0.000183718	0.00418767	1.06494	T
ATP11A	0.90813	11.1066	9.45364	0.000184556	0.00420085	1.0597	T
SLC39A13	0.689824	9.72573	9.42011	0.000187819	0.00426611	1.03952	T
RAB21	0.510071	11.7456	9.41878	0.000187951	0.00426611	1.03872	T
CNKSR2	-2.87918	1.97209	-9.41184	0.000188635	0.00427563	1.03454	T
FKBP7	0.658764	7.06625	9.40897	0.000188919	0.00427608	1.0328	T
LOC419404	-0.59981	10.6244	-9.39976	0.000189834	0.00428934	1.02724	T
SGPL1	0.900379	9.24998	9.39773	0.000190036	0.00428934	1.02602	T
ZBTB7B	0.587154	9.13581	9.37446	0.000192374	0.00433607	1.01193	T
ABCC3	0.664312	9.39232	9.36373	0.000193463	0.00435453	1.00543	T
LOC121111657	0.903702	7.29408	9.35775	0.000194073	0.0043622	1.00181	T
ASPG	0.513351	8.67577	9.35025	0.000194842	0.00436714	0.997253	T
MCM3	-0.476956	11.4459	-9.34711	0.000195165	0.00436714	0.995347	T
ID2	-0.805352	9.84962	-9.3462	0.000195259	0.00436714	0.994793	T
PKIG	0.636207	9.14256	9.34508	0.000195374	0.00436714	0.994113	T
DUSP5	0.649626	9.43428	9.33935	0.000195966	0.00437431	0.990631	T
LOC101748546	-0.793238	9.28803	-9.33554	0.00019636	0.00437707	0.988316	T
PALM	0.549865	10.6273	9.32769	0.000197176	0.0043892	0.983541	T
SPATA13	0.665234	9.01916	9.32308	0.000197657	0.00439386	0.980732	T
STMN1	-0.794485	9.50786	-9.3199	0.00019799	0.0043952	0.978797	T
C23H1ORF109	0.681475	8.28324	9.31093	0.000198931	0.00440944	0.973331	T
LOC121106795	0.962686	6.15447	9.3086	0.000199176	0.00440944	0.971913	T
PNRC2	-0.564216	11.3329	-9.30484	0.000199573	0.00441218	0.969621	T
E2F8	-0.498153	10.4248	-9.29323	0.000200805	0.00443334	0.962535	T
ANKRD10	-0.963522	8.53432	-9.28452	0.000201735	0.004444	0.957213	T
SRGAP2	-0.708237	11.386	-9.28356	0.000201838	0.004444	0.956624	T
NFIB	-1.17512	7.03374	-9.27232	0.000203046	0.00445833	0.94975	T
MMP2	-1.48185	7.26442	-9.26995	0.000203302	0.00445833	0.948298	T
LOC121111987	0.598148	3.90907	9.26982	0.000203316	0.00445833	0.948218	T
ARL8B	-0.455613	11.7713	-9.2549	0.000204935	0.00448775	0.93908	T
FUCA2	-0.799847	8.65289	-9.24482	0.000206038	0.00450344	0.932895	T
LOC107049468	2.69258	6.40095	9.24326	0.000206209	0.00450344	0.931941	T
LOC112530576	-0.835625	4.73042	-9.22959	0.000207717	0.00453025	0.923547	T
ENC1	1.77508	3.41994	9.21843	0.000208958	0.00454603	0.916682	T
SEC14L5	0.519468	9.88135	9.21458	0.000209389	0.00454603	0.91431	T
TROJANZ	-0.983481	8.73702	-9.21332	0.00020953	0.00454603	0.913535	T
ATF1	0.580324	11.4428	9.21299	0.000209566	0.00454603	0.913337	T
NRBP1	0.484344	10.3165	9.20738	0.000210195	0.00455357	0.90988	T
OVOL3	-0.557014	7.76205	-9.19122	0.000212021	0.00458698	0.899914	T
GSTA3	-0.938145	9.12159	-9.18337	0.000212914	0.00460014	0.895071	T
CCSAP	-0.653703	6.91503	-9.1785	0.000213471	0.00460601	0.892062	T
WDR54	0.554659	9.26927	9.17025	0.000214417	0.00462021	0.886967	T
TRAPPC9	0.538719	10.4087	9.16712	0.000214778	0.00462021	0.885029	T
LOC121107882	0.530811	7.76144	9.16531	0.000214986	0.00462021	0.883909	T
RAP1A	0.574731	11.2039	9.15937	0.000215673	0.00462881	0.880233	T
SLC2A14	0.457557	11.5688	9.15338	0.000216369	0.00463758	0.876522	T
SHC4	-0.553374	9.1953	-9.14853	0.000216933	0.00464352	0.873521	T
TBX21	1.08075	5.95241	9.14068	0.000217851	0.00465699	0.868656	T
PGAM1	-0.517783	14.6669	-9.13693	0.000218292	0.00466026	0.866324	T
LOC112533186	1.44136	7.76383	9.13165	0.000218913	0.00466735	0.863051	T
PRELID3A	0.97061	8.12227	9.12533	0.00021966	0.0046771	0.859125	T
ADORA2A	-0.89791	6.17274	-9.12266	0.000219976	0.00467767	0.857468	T
LOC121108042	0.970449	5.78107	9.11868	0.000220448	0.00468155	0.854996	T
PNRC1	0.543981	10.3011	9.10421	0.000222177	0.00471071	0.845991	T
CD1B	-0.971712	8.78329	-9.10232	0.000222404	0.00471071	0.844813	T
FAM102B	0.547167	10.6324	9.09407	0.000223397	0.00471907	0.839679	T
PSMD3	0.546215	12.7845	9.09204	0.000223643	0.00471907	0.838411	T
LPAR6	-1.63654	5.17485	-9.09177	0.000223675	0.00471907	0.838247	T
MGAT5	-0.502696	13.1522	-9.08425	0.000224587	0.00473213	0.833556	T
CYLD	0.565098	10.2809	9.07928	0.000225192	0.00473871	0.830452	T
NEURL1B	0.499867	9.12846	9.07536	0.000225671	0.00474261	0.828004	T
FKBP1A	-0.763276	12.0196	-9.06986	0.000226344	0.00475057	0.824573	T
BCR	-0.574901	10.4317	-9.06582	0.00022684	0.00475403	0.822049	T
TP53I11	0.759194	9.32199	9.06373	0.000227097	0.00475403	0.820743	T
LOC124417504	2.32138	1.82736	9.05969	0.000227595	0.0047583	0.818215	T
PTPRE	-0.586392	8.8862	-9.05569	0.00022809	0.0047622	0.815713	T
LOC107055361	-1.06245	9.00746	-9.05256	0.000228478	0.0047622	0.813754	T
PAK5	0.669256	9.47953	9.05104	0.000228666	0.0047622	0.812806	T
CCR5	-2.15412	6.01344	-9.04511	0.000229403	0.00477141	0.809094	T
SLC26A5	0.463813	11.3302	9.03408	0.000230783	0.00479395	0.802178	T
PLCG1	-0.646943	8.99119	-9.01925	0.000232654	0.00481832	0.792873	T
GRASP	1.61583	7.96928	9.01562	0.000233114	0.00481832	0.790595	T
TNFRSF18	-0.759449	8.2052	-9.01522	0.000233164	0.00481832	0.790346	T
CREG1	-0.489933	12.1461	-9.01463	0.000233239	0.00481832	0.789975	T
KIAA0930	0.490392	10.4917	9.01299	0.000233447	0.00481832	0.788945	T
SYNGR3	0.540694	11.1809	8.9924	0.000236085	0.00486653	0.775993	T
LOC107051471	0.633538	10.9152	8.98076	0.000237591	0.00488896	0.768657	T
PFKL	0.552517	9.67292	8.97933	0.000237778	0.00488896	0.767753	T
PIWIL1	-1.23736	8.05218	-8.96646	0.000239457	0.00491723	0.759637	T
C9orf72	-0.83742	7.77067	-8.96311	0.000239897	0.00492003	0.757518	T
CXCL13L2	5.17658	3.56592	8.95513	0.000240948	0.00492528	0.75248	T
FHIP1A	-0.620648	9.66082	-8.95493	0.000240974	0.00492528	0.752352	T
SFPQ	-0.474409	12.4163	-8.95212	0.000241347	0.00492528	0.750572	T
SNTA1	-0.562988	10.0598	-8.95192	0.000241372	0.00492528	0.750449	T
DOP1B	0.464945	9.87809	8.93499	0.000243625	0.00495899	0.739736	T
FBXL14	0.511435	11.143	8.93331	0.00024385	0.00495899	0.738669	T
LOC100859691	-1.01444	6.46599	-8.9326	0.000243945	0.00495899	0.73822	T
CRYBB1	-1.05878	7.54309	-8.92638	0.00024478	0.00496972	0.734279	T
IL18	0.645704	8.77404	8.90552	0.000247606	0.00501568	0.721039	T
HMGCR	0.498966	12.2732	8.90509	0.000247665	0.00501568	0.720766	T
LOC107054677	0.989411	6.20768	8.88876	0.000249905	0.00505471	0.71038	T
HRAS	0.9754	10.6625	8.87964	0.000251167	0.00507388	0.704571	T
EMP1	-2.96507	5.13615	-8.86594	0.000253076	0.00510606	0.695837	T
UGT8L	1.61528	6.72533	8.85297	0.000254898	0.00512218	0.687559	T
EVA1A	0.578783	7.07686	8.85251	0.000254963	0.00512218	0.687265	T
ALPK2	-0.878626	6.2886	-8.85126	0.00025514	0.00512218	0.686464	T
CDCA7	-0.630847	11.1523	-8.85124	0.000255142	0.00512218	0.686455	T
DNAH17	1.12948	12.4788	8.84304	0.000256305	0.00513914	0.68121	T
SKAP2	0.582249	9.92549	8.83281	0.000257763	0.00516196	0.674667	T
ZNF185	0.644336	7.31161	8.82683	0.00025862	0.00517271	0.670838	T
RNF157	0.700525	11.0861	8.81713	0.000260018	0.00519011	0.664618	T
LOC425462	-0.89256	8.66355	-8.81634	0.000260132	0.00519011	0.664112	T
PRPSAP2	-0.482685	9.23812	-8.80357	0.000261986	0.00522065	0.655919	T
NMI	0.596991	10.6554	8.79973	0.000262546	0.00522537	0.653454	T
CDC42EP2	0.680738	8.18873	8.79429	0.000263343	0.0052348	0.649955	T
SYNE3	-0.562373	10.5172	-8.77401	0.000266338	0.00528782	0.636907	T
TP53INP2	0.589144	9.39171	8.76726	0.000267344	0.00529694	0.632558	T
SELP	-0.89533	8.32706	-8.76653	0.000267453	0.00529694	0.632088	T
SPHK1	0.681006	11.901	8.76302	0.000267978	0.00530084	0.629825	T
CXorf57	-0.622237	12.012	-8.74833	0.000270188	0.00533249	0.620344	T
PCSK5	-0.772324	8.50887	-8.74801	0.000270237	0.00533249	0.620134	T
CKAP2	-0.659173	8.84839	-8.74321	0.000270964	0.0053403	0.617037	T
LOC107052456	0.751892	5.60212	8.73778	0.00027179	0.00534472	0.613524	T
CMTR1	-0.492188	9.53091	-8.73739	0.000271849	0.00534472	0.613272	T
OSTM1	0.533465	11.0182	8.73494	0.000272222	0.00534554	0.611691	T
SLA	-2.31619	6.24176	-8.7283	0.000273237	0.00535896	0.607396	T
KCTD12	-0.507247	10.7674	-8.72117	0.000274333	0.00536971	0.602777	T
DOT1L	0.803741	12.0814	8.72041	0.00027445	0.00536971	0.602286	T
TBX2	0.963161	6.96439	8.70457	0.000276903	0.00541116	0.592015	T
LRFN5	-0.81669	7.79755	-8.69963	0.000277673	0.00541707	0.588808	T
SOCS1L	0.943947	6.68658	8.69619	0.000278212	0.00541707	0.586573	T
LOC424919	0.686347	7.63204	8.69487	0.000278418	0.00541707	0.585719	T
MERTK	-1.05263	6.8975	-8.69405	0.000278546	0.00541707	0.585185	T
IRF5	-0.552392	9.76163	-8.68281	0.000280315	0.0054416	0.577879	T
NACC2	-0.574365	9.24282	-8.68176	0.000280481	0.0054416	0.577196	T
PLEKHG3	0.558509	9.46582	8.67876	0.000280955	0.00544426	0.575247	T
TOR3A	0.599003	8.14603	8.67008	0.000282333	0.00546039	0.569599	T
GPR37L1	3.88092	2.68628	8.66927	0.000282463	0.00546039	0.569068	T
DACH1	1.02566	6.77023	8.65938	0.000284045	0.00548441	0.562621	T
LOC107054325	-1.76809	4.88093	-8.65025	0.000285514	0.00550211	0.556667	T
LOC121106732	1.63666	5.61207	8.64945	0.000285643	0.00550211	0.556147	T
BRAF	0.492503	10.7887	8.64538	0.000286301	0.00550822	0.553492	T
FAM189A2	-0.538521	8.93845	-8.64204	0.000286842	0.00551207	0.551311	T
LOC121113484	-0.872585	7.3266	-8.63903	0.000287331	0.00551332	0.549343	T
TRPC6	1.50475	6.82005	8.63745	0.000287589	0.00551332	0.548309	T
DLGAP5	-0.494459	10.2456	-8.63409	0.000288136	0.00551726	0.546115	T
SLC7A1	3.26573	4.09562	8.6308	0.000288674	0.00552102	0.543961	T
LOC419409	-0.694037	7.08641	-8.61979	0.00029048	0.005549	0.536761	T
LOC101748992	1.04759	6.76942	8.61333	0.000291547	0.0055628	0.532528	T
SHC2	0.894273	8.15542	8.60869	0.000292316	0.0055709	0.529488	T
LOC430433	1.19161	5.78351	8.60471	0.000292977	0.00557691	0.526882	T
GABRA4	1.02854	6.17435	8.60213	0.000293407	0.00557853	0.525187	T
TNFRSF10B	0.531784	11.171	8.58984	0.000295464	0.00561104	0.517121	T
PPIP5K2	-0.685256	9.93871	-8.58755	0.000295849	0.00561175	0.515619	T
GLCCI1	-0.525883	9.40197	-8.58249	0.000296702	0.00562133	0.512295	T
KLHL5	0.456436	10.312	8.54931	0.000302369	0.005722	0.490448	T
NUP37	-0.5051	9.50188	-8.54572	0.000302991	0.00572601	0.488077	T
NUP133	-0.413732	11.5733	-8.544	0.00030329	0.00572601	0.486939	T
LOC121108149	0.789556	5.04697	8.53597	0.000304684	0.00574563	0.481642	T
HMGN2P46	-0.72227	8.51317	-8.51954	0.000307565	0.00579319	0.470775	T
TPX2	-0.404722	11.7252	-8.51264	0.000308783	0.00580307	0.466212	T
TBC1D7	0.60153	8.71138	8.51102	0.00030907	0.00580307	0.465137	T
GOLIM4	-0.585636	12.0621	-8.51048	0.000309167	0.00580307	0.464777	T
CIITA	1.12791	8.27774	8.50064	0.000310917	0.00582601	0.458259	T
LOC121107814	1.02513	6.95523	8.49956	0.00031111	0.00582601	0.457542	T
SESN2	0.716827	9.01257	8.48521	0.000313686	0.00586216	0.448018	T
MAP3K5	0.471798	10.6269	8.48425	0.000313858	0.00586216	0.447386	T
AvBD4	0.8442	11.9923	8.48276	0.000314129	0.00586216	0.44639	T
RNF13	0.451129	11.6084	8.46788	0.000316829	0.00590574	0.436504	T
HSP90AB1	0.530245	11.9356	8.4482	0.000320446	0.00596628	0.423394	T
KRT10	-1.2212	5.76723	-8.44371	0.000321278	0.00597489	0.420399	T
TBC1D16	-0.749418	8.7495	-8.42729	0.000324342	0.00602156	0.409438	T
PIK3IP1	0.62234	10.1923	8.42628	0.000324533	0.00602156	0.408757	T
ATP2A3	-0.48812	11.0844	-8.42196	0.000325344	0.00602862	0.405873	T
PINLYP	-0.640239	9.9174	-8.42029	0.00032566	0.00602862	0.404754	T
BHLHE23	-0.758617	9.25798	-8.41091	0.000327433	0.00605357	0.398481	T
LOC771422	-0.978913	5.33976	-8.40921	0.000327756	0.00605357	0.397341	T
ITPR2	-0.744951	11.573	-8.4057	0.000328424	0.00605897	0.394991	T
RGL4	-0.428136	12.1873	-8.39806	0.000329882	0.00607893	0.389874	T
SLC25A25	0.511038	9.9753	8.39578	0.000330319	0.00608005	0.388344	T
PTK6	-1.1176	6.43207	-8.39374	0.00033071	0.00608033	0.386977	T
MLLT6	0.545232	8.82867	8.38757	0.000331898	0.00609523	0.382837	T
LOC107054982	0.500318	11.0654	8.37895	0.000333566	0.00611891	0.377045	T
RND3	0.958769	6.68969	8.37691	0.000333961	0.00611921	0.375678	T
CENPP	0.403745	10.34	8.36455	0.000336372	0.00615641	0.367368	T
CTDSPL	-0.406711	9.92524	-8.35646	0.000337961	0.00617152	0.361924	T
TKTL1	0.433312	12.6195	8.35646	0.000337962	0.00617152	0.361922	T
HCN4	-2.27691	4.90161	-8.3484	0.000339554	0.00619361	0.35649	T
SPP1	-0.968459	7.53703	-8.34513	0.000340202	0.00619843	0.354288	T
PPP1R3G	0.477813	9.48061	8.33629	0.000341963	0.00620829	0.348324	T
MED12L	-0.657937	9.52069	-8.33572	0.000342076	0.00620829	0.347943	T
LOC107054937	-2.10206	1.31728	-8.33463	0.000342295	0.00620829	0.347203	T
TEF	-0.514014	11.0826	-8.33335	0.000342551	0.00620829	0.34634	T
IL13RA1	1.75357	5.10579	8.33278	0.000342664	0.00620829	0.345958	T
GBE	1.78563	3.25382	8.32428	0.000344372	0.00622788	0.340215	T
OSBPL8	-0.454179	12.0086	-8.32357	0.000344516	0.00622788	0.339731	T
IGSF11	-2.18941	2.14136	-8.32039	0.000345157	0.00623249	0.337585	T
GLRX	0.730443	7.40609	8.31396	0.000346457	0.00624899	0.333239	T
SLC13A2	1.33663	4.28873	8.30031	0.000349239	0.00629214	0.323999	T
CYP4V2	-0.763674	7.38226	-8.28987	0.000351386	0.00632378	0.316918	T
DNAAF9	0.620396	11.6134	8.28469	0.000352456	0.00633597	0.313407	T
HIVEP2	0.644628	10.1607	8.28171	0.000353073	0.00634002	0.311384	T
DOCK8	-0.623921	11.1958	-8.27697	0.000354059	0.00634794	0.308163	T
POLK	-0.534002	8.28313	-8.27581	0.0003543	0.00634794	0.307376	T
IKZF1	0.506148	10.0706	8.27303	0.000354881	0.0063513	0.305484	T
CXCR1	-1.1486	7.58711	-8.27006	0.000355501	0.00635536	0.303467	T
STARD8	0.551946	8.59668	8.2673	0.000356078	0.00635865	0.301591	T
AvBD7	0.721591	12.3759	8.26113	0.000357374	0.00637263	0.297394	T
DLG3	0.45204	8.44316	8.25982	0.000357649	0.00637263	0.296504	T
TMEM189	0.716901	10.1224	8.23954	0.00036195	0.00644215	0.282692	T
CRIM1	-0.460814	10.984	-8.23166	0.000363639	0.0064651	0.277311	T
LOC107052984	0.571851	12.3779	8.20025	0.00037046	0.00657913	0.255836	T
CSF1	0.54567	13.0447	8.18608	0.000373587	0.00662737	0.246123	T
VTCN1	-0.826687	4.84506	-8.17322	0.00037645	0.00667084	0.237299	T
TNFRSF1B	-0.601671	11.3852	-8.17032	0.000377101	0.00667505	0.235304	T
CAND2	0.619526	9.78845	8.16577	0.000378122	0.00668581	0.232177	T
COL5A2	-0.429764	10.2043	-8.16314	0.000378714	0.00668896	0.23037	T
IGBP1	0.597196	9.47163	8.15635	0.000380248	0.00670871	0.225699	T
MAP3K6	0.582617	9.80887	8.15152	0.000381343	0.0067207	0.222374	T
SPIN1	-0.523221	9.756	-8.14686	0.000382404	0.00673205	0.219164	T
GREB1L	0.794045	6.68948	8.14464	0.000382911	0.00673365	0.217631	T
SDF2L1	0.507031	10.0338	8.13128	0.000385974	0.00678014	0.208422	T
LOC121109619	2.2942	1.31377	8.11318	0.000390171	0.00684643	0.19592	T
LOC101748913	-1.38154	6.64356	-8.10949	0.000391035	0.00685414	0.193365	T
TRERF1	-0.422865	9.44606	-8.10278	0.000392608	0.006873	0.188724	T
BST1	0.716607	11.7817	8.10128	0.000392961	0.006873	0.187684	T
PLPP7	-1.45069	4.4471	-8.08046	0.000397899	0.00695183	0.17325	T
RNF166	0.495715	10.7605	8.07863	0.000398335	0.00695194	0.171984	T
RAB11FIP5	-0.507405	10.6689	-8.06493	0.00040163	0.00700188	0.162462	T
SLC2A13	0.572815	10.5938	8.05543	0.00040393	0.00703189	0.155861	T
CSF3	4.10579	5.31596	8.05423	0.000404222	0.00703189	0.155025	T
ARHGAP15	-0.741228	10.2721	-8.05105	0.000404997	0.0070319	0.152809	T
TIFA	1.23325	5.20692	8.05066	0.000405092	0.0070319	0.152538	T
STAG3	0.547355	10.5713	8.0453	0.000406403	0.00704709	0.148803	T
CH25H	0.912757	7.30814	8.04302	0.000406962	0.00704921	0.147215	T
DSE	-3.12371	1.82811	-8.03713	0.000408409	0.00706671	0.143111	T
SLC29A3	-0.408881	8.01401	-8.02149	0.000412284	0.00712613	0.132194	T
EPS8	-0.75668	9.27511	-8.01725	0.000413343	0.00713678	0.12923	T
FIGNL1	0.76791	8.95597	8.00876	0.000415469	0.00715816	0.123297	T
SLC35B2	-0.594476	8.9995	-8.00663	0.000416004	0.00715816	0.121809	T
CPS1	-0.845578	7.25666	-8.00551	0.000416288	0.00715816	0.121021	T
HCLS1	-0.455256	12.6447	-8.00088	0.000417455	0.00715816	0.117784	T
TSPAN7	-1.06657	6.08167	-8.00048	0.000417557	0.00715816	0.117503	T
NDC80	-0.539566	10.0733	-7.99948	0.00041781	0.00715816	0.116802	T
SLC13A5	1.89424	4.44552	7.99944	0.000417819	0.00715816	0.116776	T
EPB42	1.13339	5.88544	7.99824	0.000418124	0.00715816	0.115932	T
HHLA2	0.986795	8.33407	7.98839	0.000420627	0.00719338	0.109034	T
TESK1	0.666331	8.49154	7.9836	0.00042185	0.00720399	0.105675	T
TNFRSF9	0.76538	7.7568	7.98061	0.000422618	0.00720399	0.103572	T
YWHAZ	0.432162	13.1741	7.97767	0.000423372	0.00720399	0.101512	T
ANKH	-0.541967	9.2888	-7.97758	0.000423395	0.00720399	0.101448	T
GNG2	-0.573281	9.99485	-7.97727	0.000423476	0.00720399	0.101229	T
SH2D4A	0.990227	6.98671	7.97304	0.000424565	0.00721492	0.0982585	T
DHRS7	-0.685342	9.80739	-7.96667	0.000426211	0.00722199	0.0937847	T
MCM5	-0.428627	12.1509	-7.96652	0.000426249	0.00722199	0.0936805	T
AKR1B1	-0.578958	10.6862	-7.96624	0.000426321	0.00722199	0.0934852	T
B4GALNT4	-0.900063	7.34373	-7.96079	0.000427736	0.00723828	0.0896551	T
ANXA5	-0.486938	10.2018	-7.95892	0.000428223	0.00723828	0.0883385	T
ZBTB42	1.39191	6.69016	7.95738	0.000428626	0.00723828	0.0872506	T
LOC107057564	0.534984	9.81933	7.95563	0.000429082	0.00723841	0.0860213	T
CNDP1	-3.02986	1.78118	-7.94652	0.000431468	0.00726125	0.0796111	T
ZMAT3	0.487283	9.23839	7.94408	0.00043211	0.00726125	0.0778918	T
PPDPF	-0.787176	11.437	-7.94329	0.000432317	0.00726125	0.0773359	T
IFT81	-0.794814	7.95617	-7.94238	0.000432557	0.00726125	0.0766954	T
SIRT5	0.595393	9.39374	7.94119	0.000432871	0.00726125	0.0758566	T
OSBPL3	0.665702	10.6756	7.9402	0.000433132	0.00726125	0.0751594	T
TLE4	0.489532	7.51998	7.93717	0.000433933	0.00726714	0.0730232	T
TMEM50B	0.586466	9.75721	7.9311	0.000435543	0.00728655	0.0687416	T
MAP2	0.58523	8.15387	7.92704	0.000436623	0.00729707	0.0658759	T
ARAP3	-1.13788	8.29213	-7.91873	0.000438845	0.00732662	0.0600083	T
LOC112531880	-0.505591	10.378	-7.91637	0.000439478	0.00732962	0.058341	T
DHTKD1	0.446516	9.15755	7.91097	0.000440931	0.00734628	0.0545229	T
ATP6AP2	-0.410853	13.0265	-7.90699	0.000442006	0.0073566	0.0517082	T
COL5A1	-2.17564	4.52661	-7.90461	0.000442651	0.00735976	0.0500207	T
GALC	0.558106	9.04261	7.89273	0.000445884	0.00740248	0.0416076	T
RUBCN	-0.592257	9.06658	-7.8918	0.000446137	0.00740248	0.0409517	T
AvBD14	0.954878	3.31438	7.87938	0.00044955	0.00745146	0.0321392	T
LOC121107698	1.88292	1.35813	7.87143	0.000451748	0.00748022	0.0264976	T
DNAJC9	-0.513384	8.94364	-7.85306	0.000456879	0.00755745	0.0134354	T
EEPD1	0.455036	10.255	7.84146	0.000460155	0.00760386	0.0051726	T
LOC124417381	-0.65945	3.67254	-7.83892	0.000460874	0.00760752	0.00336695	T
FAM78A	-0.68893	8.27104	-7.83736	0.000461319	0.00760752	0.00225274	T
GRTP1	0.746515	7.61828	7.83506	0.000461974	0.00760809	0.000609935	T
KLF7	0.647212	7.98503	7.83393	0.000462295	0.00760809	-0.000191214	T
JUP	0.572816	9.75815	7.82736	0.000464174	0.00763125	-0.00488419	T
MGME1	-0.684239	8.05406	-7.81787	0.0004669	0.00766261	-0.0116562	T
INA	1.73437	6.44533	7.81743	0.00046703	0.00766261	-0.0119765	T
LOC112533456	1.21331	5.88237	7.81126	0.000468813	0.00768406	-0.0163839	T
ASPH	0.901243	10.4933	7.80914	0.000469428	0.00768635	-0.0179003	T
RGS10	0.457055	12.1353	7.80527	0.000470555	0.007697	-0.0206728	T
B4GALT6	-0.56696	7.88505	-7.80292	0.000471239	0.00769968	-0.0223536	T
SLC38A2	-0.455209	11.9057	-7.80143	0.000471672	0.00769968	-0.0234152	T
SLC2A9	-0.973216	7.60209	-7.78249	0.00047724	0.00778272	-0.0369894	T
ZC3HAV1	-0.475293	9.82954	-7.77913	0.000478237	0.00779112	-0.039403	T
PIKFYVE	-0.452283	10.654	-7.77474	0.000479543	0.00780452	-0.0425562	T
LOC112530174	0.868609	6.31276	7.76925	0.000481179	0.00782327	-0.0464957	T
SLC45A4	-0.406598	9.42363	-7.76107	0.000483633	0.00785527	-0.0523798	T
MCL1	0.518527	11.9349	7.75932	0.000484157	0.00785588	-0.053632	T
RAB3C	1.80197	6.70547	7.75675	0.000484932	0.00786057	-0.0554827	T
AHR1A	2.03011	5.39908	7.72162	0.000495666	0.00801868	-0.0808076	T
LY6E	-0.858228	11.1085	-7.72147	0.000495714	0.00801868	-0.0809193	T
DCSTAMP	-2.59915	3.53449	-7.71998	0.000496174	0.00801868	-0.0819927	T
PIK3C2G	-0.905277	5.49087	-7.71837	0.000496676	0.00801875	-0.0831602	T
LOC107050775	0.618475	8.77466	7.71166	0.000498762	0.00804441	-0.0880105	T
IRF4	1.54148	6.01784	7.70441	0.000501028	0.00806849	-0.0932531	T
MFSD12	0.416914	10.1074	7.70369	0.000501254	0.00806849	-0.093774	T
SIRPA	-0.716119	9.70915	-7.69842	0.000502912	0.00808712	-0.0975932	T
SEC23A	0.395339	8.73826	7.68355	0.00050762	0.00815472	-0.108373	T
CHADL	-0.613673	7.14093	-7.68105	0.000508416	0.0081594	-0.110186	T
PDXK	0.401257	11.9256	7.67581	0.000510092	0.00816459	-0.113992	T
SUSD1	0.480929	10.0503	7.67396	0.000510684	0.00816459	-0.115334	T
PRIM2	-0.474769	8.88135	-7.67374	0.000510754	0.00816459	-0.115493	T
SURF4	0.45871	12.3164	7.67372	0.000510761	0.00816459	-0.115508	T
TFAP2C	0.544552	8.23088	7.66653	0.000513072	0.00819343	-0.120731	T
SPECC1	-0.786052	7.76741	-7.66456	0.000513707	0.00819548	-0.122163	T
ST8SIA1	1.70633	6.49699	7.65898	0.000515514	0.00821619	-0.126223	T
TMEM41B	0.397448	10.4465	7.65663	0.000516274	0.0082202	-0.127928	T
TRIM59	-0.458838	10.9972	-7.6412	0.000521316	0.00828416	-0.139172	T
POMGNT1	0.380329	8.97688	7.63962	0.000521834	0.00828416	-0.14032	T
ZFP36L1	0.419567	13.0445	7.63898	0.000522047	0.00828416	-0.140792	T
LSP1P1	-0.572301	10.0663	-7.63808	0.000522342	0.00828416	-0.141445	T
UNG	-0.714097	9.27416	-7.63647	0.000522871	0.00828444	-0.142617	T
HTR2A	0.540574	8.89815	7.633	0.000524017	0.0082866	-0.145149	T
SLC4A8	-0.763425	8.33922	-7.63295	0.000524033	0.0082866	-0.145185	T
MYO3AL	-0.780861	9.2394	-7.62771	0.000525771	0.00830595	-0.149015	T
LOC121107421	1.52056	0.926948	7.61935	0.000528552	0.00834173	-0.155119	T
PTPN6	-0.398913	11.9135	-7.61327	0.000530586	0.00835901	-0.159561	T
RASSF6	-0.877697	7.44587	-7.61299	0.000530681	0.00835901	-0.15977	T
SMARCE1	-0.383008	10.8328	-7.61021	0.000531614	0.00836554	-0.1618	T
CD200R1A	-2.48242	6.49006	-7.60588	0.000533073	0.00838034	-0.164971	T
ASTE1	0.530863	8.57505	7.59747	0.000535918	0.00841687	-0.171129	T
LOC121108358	-2.09734	2.32018	-7.59546	0.0005366	0.00841941	-0.1726	T
LOC107052596	-0.818401	4.97435	-7.59022	0.000538386	0.00843923	-0.176444	T
MCM10	-0.540307	9.24448	-7.58728	0.000539391	0.0084468	-0.178602	T
KCNK13	-1.15734	6.32655	-7.58229	0.000541099	0.00846535	-0.182261	T
LOC121107918	-0.442552	8.58614	-7.57986	0.000541935	0.00846627	-0.184046	T
CYP2W2	-0.893692	5.50251	-7.57907	0.000542206	0.00846627	-0.184625	T
RASA3	-0.410875	10.6196	-7.57486	0.000543658	0.00848075	-0.187719	T
COA4	0.435228	6.81266	7.57242	0.000544498	0.00848567	-0.189506	T
CASP18	-0.420446	9.31288	-7.56585	0.000546777	0.00850093	-0.194337	T
CBLB	-0.47649	9.27702	-7.56506	0.000547053	0.00850093	-0.194922	T
GGA1	0.424975	11.1583	7.56505	0.000547056	0.00850093	-0.194927	T
LOC107053675	0.638996	7.0924	7.5598	0.000548884	0.00852114	-0.198786	T
LOC101751794	-0.760506	7.89459	-7.54687	0.00055342	0.00858024	-0.208309	T
LOC121109988	-0.952596	6.10858	-7.54372	0.000554532	0.00858024	-0.210631	T
NBEAL2	-0.607373	10.4554	-7.54243	0.000554987	0.00858024	-0.21158	T
LOC121107379	-2.52471	1.26235	-7.54174	0.00055523	0.00858024	-0.212087	T
LOC112532338	0.737739	8.16003	7.54142	0.000555345	0.00858024	-0.212327	T
AP2M1	-0.396382	11.8322	-7.53443	0.000557824	0.00860457	-0.21748	T
CD164	-0.37824	13.2413	-7.53398	0.000557985	0.00860457	-0.217813	T
YARS	0.356949	10.7219	7.52794	0.00056014	0.00862823	-0.222274	T
IL16	0.81844	10.0323	7.52621	0.000560758	0.00862823	-0.223549	T
LOC121108570	-0.434993	8.10821	-7.5252	0.00056112	0.00862823	-0.224297	T
DUSP6	-0.701625	9.69824	-7.51598	0.000564437	0.00866922	-0.231115	T
CSRP1	0.427675	9.43399	7.51481	0.000564859	0.00866922	-0.231981	T
TESC	0.861228	5.96109	7.51242	0.000565721	0.0086742	-0.233744	T
CSF3R	-0.441844	13.8831	-7.50513	0.000568365	0.0087061	-0.239139	T
TIMM10B	0.368791	8.5826	7.50372	0.000568878	0.0087061	-0.240184	T
PCNA	-0.459429	12.1436	-7.49473	0.000572163	0.00874676	-0.246845	T
PGAP1	-0.590905	8.3858	-7.49349	0.000572618	0.00874676	-0.247765	T
TGIF1	0.477363	10.236	7.48249	0.000576672	0.00877662	-0.255929	T
MDM4	0.440953	11.7357	7.48105	0.000577205	0.00877662	-0.256997	T
ALDH4A1	-0.421071	9.21619	-7.47994	0.000577617	0.00877662	-0.257822	T
RUSC2	1.23753	7.39003	7.47898	0.000577973	0.00877662	-0.258537	T
PLA2G15	-0.515931	8.06066	-7.47766	0.000578462	0.00877662	-0.259515	T
PATJ	0.403594	6.95957	7.47737	0.000578571	0.00877662	-0.259732	T
LOC121109849	1.17262	1.25297	7.47706	0.000578686	0.00877662	-0.259962	T
ACSBG2	0.644817	11.9289	7.47644	0.000578917	0.00877662	-0.260424	T
DUSP8	2.07658	6.30777	7.47417	0.000579761	0.00878117	-0.262109	T
MAP7D2	1.68556	5.85131	7.46619	0.00058274	0.00881803	-0.26804	T
G2E3	-0.531684	9.82777	-7.46325	0.000583842	0.00882645	-0.270226	T
CAMK1D	-0.744705	8.65899	-7.46108	0.000584657	0.00883019	-0.27184	T
CYTIP	-1.26035	5.79509	-7.45969	0.000585182	0.00883019	-0.27288	T
RASSF2	-0.625935	9.94357	-7.45693	0.00058622	0.00883108	-0.274929	T
MCTP1	-1.14643	5.35126	-7.45663	0.000586334	0.00883108	-0.275155	T
LOC124416955	1.08876	8.18362	7.45313	0.000587656	0.00884274	-0.27776	T
LOC101748339	0.617728	9.75744	7.44521	0.000590663	0.00887972	-0.283666	T
EOGT	-0.538084	9.00806	-7.44097	0.000592278	0.0088882	-0.286826	T
SYK	-0.45895	9.05617	-7.44048	0.000592464	0.0088882	-0.287189	T
MIS18BP1	-0.445602	9.90364	-7.4394	0.000592877	0.0088882	-0.287995	T
SLC24A3	0.555756	10.1409	7.43388	0.000594991	0.00891163	-0.292114	T
ST3GAL6	0.810505	7.89571	7.42509	0.000598377	0.00895404	-0.29868	T
GMDS	0.415897	10.4183	7.41706	0.000601491	0.00899056	-0.304687	T
MYO5A	0.598865	10.5697	7.41593	0.00060193	0.00899056	-0.305531	T
FNDC3A	0.458839	11.1775	7.40665	0.000605556	0.00903637	-0.312481	T
CBX7	-0.518797	10.3379	-7.39933	0.000608433	0.00906597	-0.317965	T
IL4R	0.660871	9.43269	7.39875	0.000608662	0.00906597	-0.3184	T
TCEANC2	0.76023	7.04589	7.38693	0.00061334	0.00912725	-0.327261	T
GALNT14	0.930991	6.50907	7.37604	0.000617694	0.00918358	-0.335446	T
TRA2A	-0.355386	11.2357	-7.36647	0.000621547	0.00923237	-0.342642	T
SCN1A	-2.40003	3.28446	-7.35796	0.000624998	0.0092686	-0.34905	T
TMEM184A	0.63392	7.19593	7.35677	0.000625483	0.0092686	-0.349947	T
LOC121108366	1.45053	5.65931	7.35542	0.000626032	0.0092686	-0.350963	T
ZNF326	-0.407256	10.0568	-7.35313	0.000626966	0.0092686	-0.352687	T
DAB2	1.55929	6.45636	7.35262	0.000627175	0.0092686	-0.353073	T
TMTC2	0.477269	9.42739	7.352	0.000627427	0.0092686	-0.353538	T
APP	-0.438684	10.8792	-7.34054	0.00063213	0.0093152	-0.36218	T
RAP2C	0.38865	12.0503	7.33968	0.000632486	0.0093152	-0.362832	T
LOC121110431	1.08417	7.77721	7.33962	0.000632512	0.0093152	-0.362879	T
LOC107055388	0.466867	10.1641	7.33871	0.000632887	0.0093152	-0.363565	T
CDK18	-0.780993	8.96017	-7.32571	0.000638278	0.00938597	-0.373381	T
LOC121108367	2.77601	3.34948	7.32433	0.000638857	0.00938597	-0.37443	T
TSPOAP1	2.50905	2.62303	7.32262	0.000639571	0.00938609	-0.375722	T
LOC424109	0.486158	8.36941	7.32096	0.000640264	0.00938609	-0.376975	T
SRF	0.565043	10.2931	7.32014	0.000640607	0.00938609	-0.377596	T
KIAA1524	-0.78418	8.95886	-7.31425	0.000643081	0.00940965	-0.382057	T
AGPAT4	-0.505314	10.8522	-7.312	0.000644029	0.00940965	-0.383762	T
LOC771545	-0.524337	9.40626	-7.31193	0.000644056	0.00940965	-0.38381	T
DLGAP4	-0.44292	10.1369	-7.31004	0.000644853	0.00940965	-0.385241	T
CHCHD2	0.576146	12.1837	7.30939	0.000645126	0.00940965	-0.385731	T
SQSTM1	0.365603	9.69079	7.30341	0.00064766	0.009431	-0.390266	T
ADCY7	-0.422677	9.09256	-7.30269	0.000647966	0.009431	-0.390814	T
SGMS2	-0.457817	11.1278	-7.3018	0.000648341	0.009431	-0.391484	T
PPARA	0.599836	9.83599	7.29318	0.000652016	0.00947593	-0.398025	T
ACSL3	-0.429268	10.6909	-7.29162	0.000652685	0.00947713	-0.399211	T
GRB10	0.462768	10.307	7.28407	0.000655927	0.00951565	-0.404945	T
KLHL9	-0.416197	9.97974	-7.28196	0.000656833	0.00951728	-0.406543	T
GNB4	0.454676	11.3329	7.28059	0.000657425	0.00951728	-0.407585	T
ANLN	-0.461137	10.7175	-7.27941	0.000657937	0.00951728	-0.408487	T
ZNF462	-0.841529	8.49953	-7.27835	0.000658395	0.00951728	-0.409291	T
LOC121107830	-0.970054	7.12272	-7.2765	0.000659194	0.00952032	-0.410696	T
WNK2	0.568465	8.6813	7.27124	0.000661478	0.00954477	-0.414698	T
BUB1	-0.462834	10.1349	-7.26787	0.000662946	0.00955742	-0.417263	T
KIF20A	-0.497889	10.5571	-7.26543	0.000664011	0.00956425	-0.419122	T
ADGRL2	0.726223	9.08086	7.25966	0.000666537	0.00959208	-0.423515	T
DISP3	-0.683804	9.33412	-7.25795	0.000667288	0.00959435	-0.42482	T
OGT	-0.376981	11.6931	-7.24429	0.00067332	0.0096639	-0.435233	T
FADS6	1.9399	5.78401	7.24429	0.000673321	0.0096639	-0.435236	T
RHOBTB2	0.43505	9.52278	7.24194	0.000674365	0.00966539	-0.437027	T
LOC121108155	0.625906	4.4031	7.24136	0.000674622	0.00966539	-0.437469	T
TRIM24	-0.621076	9.64037	-7.23828	0.000675996	0.00967651	-0.439824	T
LOC121110639	-1.88645	0.943224	-7.23609	0.000676973	0.00968191	-0.441495	T
OSBPL1A	-0.447895	8.61546	-7.22647	0.00068129	0.00973504	-0.448853	T
TGS1	0.474694	9.75753	7.22025	0.000684097	0.00976651	-0.45361	T
POLD4	0.570945	8.23588	7.21784	0.000685188	0.00977346	-0.455455	T
LOC121110471	-3.04624	1.78937	-7.21485	0.000686546	0.00978418	-0.457745	T
PPP1R14D	-1.55303	4.0806	-7.20405	0.000691474	0.00984279	-0.466023	T
NR1D2	-0.395997	8.89698	-7.20275	0.00069207	0.00984279	-0.467021	T
ZNF365	0.447615	10.0219	7.20184	0.000692485	0.00984279	-0.467715	T
FDPS	0.440861	10.9017	7.1928	0.000696652	0.00989332	-0.474658	T
ATP6V1D	0.497523	11.227	7.18902	0.000698399	0.00990942	-0.477557	T
MLEC	0.410505	12.3767	7.18017	0.000702517	0.0099591	-0.484361	T
PRKCH	1.93461	4.49282	7.17617	0.00070439	0.0099769	-0.487442	T
NUF2	-0.466158	9.50616	-7.16298	0.000710597	0.0100489	-0.497595	T
CX3CL1	2.57655	3.27966	7.16273	0.000710716	0.0100489	-0.497791	T
FOXL2	0.449212	8.401	7.15626	0.000713784	0.0100834	-0.502775	T
CNDP2	-0.553681	9.4676	-7.15042	0.000716571	0.0100991	-0.507285	T
GAS2L3	-0.491676	9.51459	-7.14947	0.000717023	0.0100991	-0.508016	T
UBE2M	0.531667	8.58839	7.14914	0.00071718	0.0100991	-0.508269	T
FAM114A1	-1.22765	7.11948	-7.14791	0.000717767	0.0100991	-0.509216	T
IFNAR1	-0.45318	8.0507	-7.14739	0.000718017	0.0100991	-0.509618	T
PLK3	0.717699	8.01032	7.14491	0.000719207	0.0101071	-0.511536	T
MYH7B	2.94651	2.89796	7.12633	0.000728189	0.0102145	-0.525899	T
SRSF2	-0.370444	12.6678	-7.12521	0.000728735	0.0102145	-0.526767	T
LOC107051965	-0.79929	5.9014	-7.12517	0.000728753	0.0102145	-0.526796	T
NCEH1	-0.496767	9.75183	-7.10306	0.000739624	0.0103579	-0.543934	T
OSBPL9	-0.380794	10.0676	-7.0994	0.000741441	0.0103684	-0.546772	T
EML4	0.548076	9.1266	7.09897	0.000741656	0.0103684	-0.547108	T
LOC121108011	0.491854	9.3882	7.08769	0.000747297	0.0104383	-0.555878	T
GALNT11	0.521407	9.02681	7.0804	0.000750965	0.0104804	-0.561546	T
ITGB6	1.66139	6.95616	7.07866	0.000751842	0.0104831	-0.562896	T
FNDC5	1.46607	6.08001	7.07673	0.000752821	0.0104831	-0.564402	T
SAMD12	-0.445966	11.2745	-7.07604	0.00075317	0.0104831	-0.564939	T
LOC421268	3.05376	4.45687	7.07489	0.000753751	0.0104831	-0.565832	T
DUSP19	-0.557643	8.29527	-7.07207	0.000755183	0.010494	-0.568028	T
SNX30	-0.475523	9.12247	-7.06548	0.000758541	0.0105287	-0.573163	T
MAFF	0.981934	9.04499	7.06414	0.00075923	0.0105287	-0.574214	T
LOC107050995	0.412178	8.90809	7.06334	0.000759637	0.0105287	-0.574835	T
MARCKSL1	1.04638	8.89045	7.0574	0.000762683	0.0105619	-0.579466	T
LOC112532479	1.53081	4.95172	7.05514	0.000763848	0.0105628	-0.581232	T
RRP7A	0.461502	8.9131	7.05474	0.000764055	0.0105628	-0.581546	T
LOC107053557	1.19525	7.94233	7.05035	0.000766318	0.0105798	-0.58497	T
HOXA1	0.646165	7.51501	7.04981	0.000766598	0.0105798	-0.585392	T
MAPKAPK5	0.499364	5.96089	7.04599	0.000768578	0.0105981	-0.588377	T
WASHC1	0.336643	9.53752	7.03945	0.000771983	0.010636	-0.593494	T
NCAPG2	-0.589441	9.46926	-7.03271	0.000775508	0.0106735	-0.598767	T
FOXM1	-0.506426	9.79102	-7.03172	0.000776028	0.0106735	-0.599542	T
IQGAP2	-1.03201	11.1097	-7.02456	0.000779792	0.0107162	-0.605143	T
ARHGAP36	1.78385	4.84932	7.02108	0.000781631	0.0107296	-0.607868	T
LOC121113105	-1.48654	2.5668	-7.01959	0.000782424	0.0107296	-0.609043	T
KIF20AL	-0.625589	8.48222	-7.01896	0.000782757	0.0107296	-0.609536	T
NSMF	0.689562	7.56484	7.01492	0.000784904	0.0107499	-0.612705	T
LOC107051582	-0.926269	4.66989	-7.00753	0.000788844	0.0107838	-0.618501	T
FUT7	-0.715974	8.20501	-7.00752	0.000788848	0.0107838	-0.618506	T
SCN9A	-1.35968	5.42538	-7.00652	0.000789386	0.0107838	-0.619296	T
LBP	0.420942	12.1086	6.99916	0.000793337	0.0108221	-0.625074	T
LOC100858386	0.524685	8.46914	6.99881	0.000793528	0.0108221	-0.625352	T
FGD4	-0.687306	8.42451	-6.99729	0.000794347	0.0108241	-0.626546	T
ENTPD4	0.455873	9.35503	6.99096	0.000797768	0.0108557	-0.63152	T
DCST2	1.4195	5.54924	6.99052	0.000798007	0.0108557	-0.631868	T
GMPS	0.347759	11.074	6.98773	0.000799524	0.0108584	-0.634065	T
ZYX	0.4268	11.355	6.98672	0.000800071	0.0108584	-0.634858	T
SEPTIN11	-0.658119	9.57474	-6.98644	0.000800221	0.0108584	-0.635075	T
SMARCB1	0.390056	9.72111	6.98049	0.000803465	0.0108836	-0.639757	T
PRKCB	-0.514834	9.82065	-6.9781	0.000804778	0.0108836	-0.641647	T
KCNMB1	0.521047	6.77217	6.97728	0.000805228	0.0108836	-0.642293	T
SERPINB6	-0.449519	9.30614	-6.97699	0.000805386	0.0108836	-0.642521	T
C1H3ORF52	1.53648	6.5276	6.97688	0.000805443	0.0108836	-0.642603	T
GLIS3	1.22742	3.86584	6.96906	0.000809746	0.010925	-0.64877	T
TBX3	-1.39427	4.22899	-6.96833	0.000810147	0.010925	-0.649343	T
MAPK4	0.391881	13.1809	6.96738	0.000810673	0.010925	-0.650094	T
ARHGAP25	-0.751717	8.91365	-6.9664	0.000811212	0.010925	-0.650863	T
CECR2	0.536813	10.9576	6.96025	0.000814624	0.0109618	-0.655721	T
GINM1	-0.473302	10.9178	-6.95611	0.000816926	0.0109836	-0.658987	T
CLSTN1	0.451057	10.6719	6.95283	0.000818758	0.0109991	-0.661579	T
LOC418222	4.92001	3.85518	6.94826	0.000821316	0.0110243	-0.66519	T
LOC424014	-2.66201	4.49524	-6.94083	0.0008255	0.0110713	-0.671071	T
TBC1D2	0.657088	8.35615	6.93666	0.000827857	0.0110912	-0.674371	T
SLC6A6	0.361986	12.016	6.93546	0.000828536	0.0110912	-0.675321	T
PTCH1	-0.405905	7.94487	-6.93457	0.000829043	0.0110912	-0.676028	T
BCL2A1	-0.929149	6.94881	-6.93058	0.00083131	0.0111123	-0.679189	T
PLCG2	-0.637745	9.61509	-6.9261	0.000833858	0.0111313	-0.682732	T
INPPL1	0.618837	7.54856	6.92567	0.000834109	0.0111313	-0.683079	T
NT5C3A	-0.497621	8.53992	-6.91693	0.000839117	0.0111889	-0.690007	T
SSH3	0.480238	9.192	6.91498	0.000840242	0.0111947	-0.691559	T
GTSE1	-0.38402	9.78434	-6.90827	0.000844118	0.0112371	-0.696885	T
ANKRD22	-0.966373	6.65783	-6.90374	0.000846748	0.01126	-0.700486	T
MMP9	3.15019	2.27217	6.90291	0.000847232	0.01126	-0.701148	T
NUP155	-0.362415	11.5108	-6.90128	0.000848178	0.0112633	-0.70244	T
TGFB1	0.651122	12.0349	6.89673	0.000850836	0.0112853	-0.70606	T
CBL	-0.44485	11.7565	-6.89605	0.000851234	0.0112853	-0.706601	T
TLCD2	-0.460736	6.76397	-6.89461	0.000852075	0.0112872	-0.707745	T
CYP1A1	2.44787	2.5437	6.88611	0.000857074	0.0113441	-0.714515	T
PMP22	-1.36039	7.3355	-6.88455	0.000857995	0.0113466	-0.715758	T
TMPPE	0.628457	8.71104	6.88341	0.000858666	0.0113466	-0.716663	T
HCK	-1.08537	6.97879	-6.88096	0.000860113	0.0113564	-0.718612	T
LOC100859492	1.04847	6.12053	6.87572	0.000863227	0.0113883	-0.722795	T
PTPN14	-0.796216	9.12032	-6.8704	0.000866397	0.0114208	-0.727037	T
ZNF423	-0.956261	4.64506	-6.86553	0.000869315	0.0114499	-0.730929	T
NFE2L2	0.370675	11.6688	6.86401	0.000870227	0.0114526	-0.732142	T
CCDC6	-0.344386	10.6073	-6.86165	0.000871641	0.0114618	-0.734021	T
ABCG4	-1.37462	2.52659	-6.85347	0.000876582	0.0115174	-0.740564	T
TFDP3	-0.355352	11.8078	-6.84781	0.00088002	0.0115471	-0.745094	T
ZSWIM5	0.59356	8.01369	6.8474	0.000880268	0.0115471	-0.745421	T
PRC1	-0.416119	10.3899	-6.84543	0.000881463	0.0115534	-0.746991	T
PACSIN2	0.655823	12.635	6.84369	0.00088253	0.011558	-0.748391	T
FBP1	-0.782692	8.79916	-6.83758	0.000886268	0.0115975	-0.753282	T
ADGRD2	-0.689763	7.29141	-6.83504	0.000887827	0.0116086	-0.755317	T
SRC	-0.351026	9.42005	-6.8322	0.000889575	0.011622	-0.757593	T
OGDH	0.39955	11.4369	6.82818	0.000892057	0.0116448	-0.760817	T
TLR5	-2.36881	3.33194	-6.82704	0.000892763	0.0116448	-0.761733	T
FUT10	-0.728077	6.79533	-6.82516	0.000893929	0.0116483	-0.763244	T
SEC24A	0.377958	10.1119	6.82428	0.000894472	0.0116483	-0.763947	T
ZFPM1	0.350958	8.91103	6.8181	0.000898314	0.0116776	-0.768908	T
TEX11	0.5006	9.36839	6.81761	0.000898618	0.0116776	-0.769299	T
TRIB1	0.424914	8.8187	6.81718	0.00089889	0.0116776	-0.769649	T
CILP	-1.62991	1.34746	-6.81125	0.000902598	0.0117164	-0.774414	T
LOC107049269	0.652009	8.1277	6.80659	0.000905523	0.0117449	-0.778159	T
TOM1L2	0.348917	7.87671	6.80397	0.000907174	0.0117569	-0.780267	T
LOC107056139	3.02814	4.72202	6.80151	0.000908725	0.0117594	-0.782244	T
ADRA1B	0.547644	8.12627	6.80135	0.000908824	0.0117594	-0.78237	T
OTUD7A	0.555722	8.48924	6.80001	0.000909673	0.011761	-0.783451	T
LOC101751416	-1.00668	7.06613	-6.79647	0.000911915	0.0117805	-0.7863	T
CYFIP1	0.48395	10.8017	6.78699	0.000917952	0.0118346	-0.793937	T
MYO6	0.429627	8.51125	6.78694	0.000917987	0.0118346	-0.793981	T
SMOC1	0.362685	7.41479	6.78639	0.000918339	0.0118346	-0.794425	T
LRSAM1	0.371938	8.43246	6.78531	0.000919028	0.0118346	-0.795293	T
RFTN2	0.391429	11.1061	6.78087	0.000921879	0.0118619	-0.798877	T
ZDHHC17	-0.534123	9.88404	-6.77186	0.000927689	0.0119158	-0.806149	T
PRTFDC1	0.479873	9.53636	6.77088	0.000928324	0.0119158	-0.806941	T
FAM83D	-0.341282	9.95498	-6.77	0.000928892	0.0119158	-0.807649	T
SLC36A1	-0.410587	9.32472	-6.76981	0.000929017	0.0119158	-0.807805	T
TCF12	-0.360471	12.5162	-6.76088	0.000934825	0.0119719	-0.815018	T
ADGRA3	-0.490348	8.27738	-6.76007	0.000935357	0.0119719	-0.815675	T
LOC101748060	-0.767882	5.33552	-6.75967	0.000935618	0.0119719	-0.815999	T
CCDC57	0.975117	6.0312	6.75645	0.000937727	0.0119894	-0.818605	T
GSG2	-0.388468	8.77188	-6.75401	0.000939326	0.0120004	-0.820577	T
F13A1	-0.396977	12.3312	-6.75085	0.000941409	0.0120175	-0.823141	T
PHACTR4	-0.540804	8.19868	-6.74962	0.000942214	0.0120183	-0.82413	T
JAG2	0.575443	9.36238	6.74607	0.000944561	0.0120387	-0.827009	T
NEFL	-1.19454	6.11514	-6.74115	0.000947823	0.0120684	-0.830999	T
LOC107056693	-0.564366	10.2715	-6.7392	0.000949118	0.0120684	-0.832579	T
BRMS1L	-0.471434	10.2268	-6.73918	0.000949131	0.0120684	-0.832595	T
LPAR5	-1.35896	4.24297	-6.73621	0.000951107	0.0120773	-0.835002	T
LOC107049264	0.817588	10.1943	6.73588	0.000951325	0.0120773	-0.835267	T
COL15A1	-0.55713	9.59756	-6.73304	0.000953223	0.0120919	-0.837573	T
PROM1	-0.722017	8.40302	-6.73129	0.000954396	0.0120973	-0.838997	T
AQP11	-1.42663	3.65432	-6.72953	0.000955576	0.0121027	-0.840427	T
FRMD6	0.811558	7.94123	6.72736	0.00095703	0.0121116	-0.842187	T
HOXA4	0.719766	5.78696	6.71743	0.000963721	0.0121868	-0.85025	T
ARHGEF3	0.657241	8.1176	6.71585	0.000964792	0.0121908	-0.851536	T
INF2	-0.49308	9.45991	-6.70548	0.000971856	0.0122612	-0.859978	T
CHST15	-0.541267	8.31519	-6.7053	0.000971974	0.0122612	-0.860119	T
MIR3064	-0.436269	9.3395	-6.70396	0.000972896	0.0122612	-0.861216	T
RFC2	-0.400589	9.52771	-6.70262	0.00097381	0.0122612	-0.862303	T
MCM2	-0.342267	11.8921	-6.70211	0.00097416	0.0122612	-0.862719	T
HS2ST1	-0.371463	10.5564	-6.6933	0.000980225	0.0123254	-0.869902	T
EDN3	0.334524	9.48071	6.69234	0.00098089	0.0123254	-0.870687	T
PLEKHA3	0.444937	9.96819	6.69069	0.000982027	0.0123254	-0.872027	T
GGCT	-0.67822	7.26477	-6.69022	0.000982355	0.0123254	-0.872414	T
STK40	0.53985	9.49662	6.68918	0.000983077	0.0123254	-0.873264	T
GRK3	-0.393231	12.7131	-6.68665	0.00098483	0.0123286	-0.875326	T
WDR90	-0.483414	9.36544	-6.686	0.000985279	0.0123286	-0.875854	T
PTGFRN	0.465724	10.5059	6.68474	0.000986159	0.0123286	-0.876887	T
CCDC50	-0.403831	11.9701	-6.68433	0.000986438	0.0123286	-0.877215	T
ZNF706	0.393014	12.2492	6.68324	0.000987202	0.0123286	-0.87811	T
LOC121109863	0.62559	8.64115	6.68223	0.000987903	0.0123286	-0.878932	T
RELL1	0.402731	9.56623	6.67936	0.000989904	0.012344	-0.881273	T
UBXN2A	-0.348749	9.27346	-6.67726	0.000991372	0.0123468	-0.882989	T
LOC121107815	-1.90478	0.952392	-6.67686	0.000991654	0.0123468	-0.883318	T
HK2	0.46595	11.1595	6.67066	0.000996008	0.0123914	-0.888388	T
E2F3	0.386847	9.14087	6.66553	0.000999624	0.0124269	-0.892583	T
SBF2	0.510579	10.0604	6.66133	0.0010026	0.0124542	-0.896017	T
DHFR	-0.611004	8.57339	-6.65953	0.00100387	0.0124605	-0.89749	T
PARP14	-0.442739	10.9274	-6.65153	0.00100958	0.0125217	-0.90405	T
LOC107052071	-2.59039	2.89387	-6.64991	0.00101073	0.0125264	-0.905374	T
TMEM63A	0.3466	10.3647	6.64614	0.00101344	0.0125504	-0.908469	T
CENPT	-0.373362	9.33478	-6.64417	0.00101486	0.0125533	-0.910087	T
TSPEAR	0.411157	8.86233	6.64262	0.00101597	0.0125533	-0.911355	T
SKA2P1	-0.552071	7.34646	-6.64257	0.00101601	0.0125533	-0.911396	T
GPR155	0.696583	9.38845	6.64083	0.00101726	0.0125592	-0.912824	T
ANK3	-1.1049	7.66869	-6.63964	0.00101812	0.0125602	-0.913797	T
ID3	-0.9272	6.83053	-6.6376	0.00101959	0.0125688	-0.915475	T
COL11A1	-0.483801	8.41401	-6.63203	0.00102363	0.012609	-0.920051	T
TUBA8A	-1.89718	3.48603	-6.62937	0.00102557	0.0126231	-0.922234	T
AKAP12	1.02056	1.17695	6.62407	0.00102944	0.0126611	-0.926592	T
HTR4	0.666723	7.21992	6.61694	0.00103467	0.0127158	-0.932461	T
ARHGEF18	-0.4497	10.1073	-6.60999	0.00103979	0.0127662	-0.938177	T
UCKL1	0.61193	9.21026	6.60925	0.00104035	0.0127662	-0.938792	T
SPOCK2	0.953788	4.08498	6.6075	0.00104164	0.0127669	-0.94023	T
MAST3	-0.63431	8.35988	-6.60704	0.00104198	0.0127669	-0.940613	T
ELL	0.39895	9.64973	6.60084	0.0010466	0.0128137	-0.945724	T
RNF144A	0.742791	9.13552	6.59901	0.00104796	0.012817	-0.947232	T
MYO3B	0.699635	10.0195	6.59762	0.001049	0.012817	-0.94838	T
FOXP4	0.43765	9.90243	6.59729	0.00104925	0.012817	-0.948651	T
EZH2	-0.600686	10.1242	-6.5949	0.00105104	0.0128232	-0.950625	T
BCL2L13	-0.356648	11.8085	-6.59449	0.00105135	0.0128232	-0.950963	T
MOB4	0.446626	9.70239	6.59129	0.00105374	0.0128428	-0.953599	T
LOC430746	0.652604	8.14691	6.58608	0.00105767	0.012881	-0.957908	T
RALGPS1	-0.367693	9.07484	-6.58135	0.00106125	0.0129108	-0.961812	T
COL4A5	-0.860954	7.08894	-6.58073	0.00106172	0.0129108	-0.962326	T
HRC8L	-2.60352	1.83426	-6.57448	0.00106648	0.0129589	-0.9675	T
RRAS	0.33414	8.32855	6.56957	0.00107022	0.0129947	-0.971559	T
PHF21A	0.470066	9.83811	6.56226	0.00107584	0.0130531	-0.97762	T
CA5A	-0.380945	11.771	-6.55886	0.00107846	0.013075	-0.980432	T
ZBTB46	0.385465	10.7835	6.55053	0.00108492	0.0131404	-0.98734	T
MCM4	-0.364185	11.5518	-6.54981	0.00108548	0.0131404	-0.987937	T
PIK3CB	0.348853	10.7859	6.54778	0.00108706	0.013143	-0.989623	T
MICALL2	0.362776	8.80466	6.54745	0.00108732	0.013143	-0.989903	T
CAP1	-0.361745	13.0361	-6.54195	0.00109162	0.0131852	-0.99447	T
MFSD2A	-0.58412	10.0491	-6.53792	0.00109478	0.0132134	-0.997813	T
TINAGL1	0.657892	6.63039	6.53035	0.00110076	0.013271	-1.00411	T
RAPH1	0.54865	9.36517	6.52905	0.00110179	0.013271	-1.00519	T
GALNT1	-0.379472	11.513	-6.52876	0.00110202	0.013271	-1.00543	T
LOC101752158	1.15312	6.29023	6.52368	0.00110605	0.0133067	-1.00966	T
LOC112531607	-1.61538	5.54135	-6.52296	0.00110663	0.0133067	-1.01027	T
SYT11	-0.423922	9.9022	-6.51737	0.00111109	0.0133504	-1.01492	T
LOC101750621	-0.827855	7.0812	-6.51397	0.00111381	0.0133732	-1.01776	T
LOC100857512	0.541896	9.16735	6.51161	0.0011157	0.013386	-1.01972	T
ABCC1	0.383856	11.7868	6.50736	0.00111913	0.0134171	-1.02327	T
LOC418108	-0.3785	9.27877	-6.50567	0.00112049	0.0134235	-1.02468	T
PPAT	-0.551287	8.29667	-6.50018	0.00112494	0.0134668	-1.02926	T
PLA2G4A	0.44786	11.015	6.49768	0.00112697	0.0134811	-1.03134	T
GADL1	-0.563424	7.83957	-6.49624	0.00112815	0.0134818	-1.03255	T
DUT	-0.479009	10.4954	-6.49557	0.00112869	0.0134818	-1.03311	T
SNX25	-0.334163	9.87293	-6.48973	0.00113346	0.0135287	-1.03799	T
TAF5L	-0.381254	11.6753	-6.48613	0.00113642	0.0135376	-1.041	T
CREB3L1	-0.540108	8.9372	-6.48589	0.00113661	0.0135376	-1.0412	T
LOC124417693	1.00134	4.74191	6.48575	0.00113672	0.0135376	-1.04131	T
LOC107054880	-1.69259	1.11254	-6.48468	0.00113761	0.0135382	-1.04221	T
SPEF2	-0.902162	5.03927	-6.47584	0.00114491	0.013615	-1.04962	T
RAC1	-0.327811	10.8961	-6.46885	0.00115072	0.0136685	-1.05547	T
ASAP1	-0.442513	9.46703	-6.46839	0.0011511	0.0136685	-1.05586	T
IGSF3	0.335901	10.9934	6.4663	0.00115284	0.0136792	-1.05761	T
KLHL3	0.415546	7.74702	6.46456	0.0011543	0.0136865	-1.05907	T
FAM181B	0.823861	8.19724	6.45818	0.00115965	0.0137337	-1.06442	T
PPP1R1A	0.443856	9.13178	6.45779	0.00115998	0.0137337	-1.06475	T
THEMIS2	0.556365	8.07735	6.45661	0.00116097	0.0137354	-1.06574	T
PPP1R1B	2.08822	1.34286	6.45492	0.00116239	0.0137421	-1.06715	T
LOC101748065	0.729321	6.6499	6.45206	0.00116481	0.013751	-1.06956	T
LOC107050229	-0.473537	8.34581	-6.45202	0.00116485	0.013751	-1.06959	T
LOC124417805	-0.880353	4.38059	-6.44747	0.0011687	0.0137864	-1.07342	T
FAM35A	-1.06412	9.64737	-6.44439	0.00117132	0.0138072	-1.07601	T
LOC107053603	-1.66059	1.09654	-6.43918	0.00117576	0.0138356	-1.08039	T
BRE	-0.370353	11.157	-6.43899	0.00117592	0.0138356	-1.08054	T
LIG4	-0.559217	5.93365	-6.43646	0.0011781	0.0138356	-1.08268	T
PIAS1	-0.442946	9.89638	-6.43636	0.00117818	0.0138356	-1.08276	T
GABPA	-0.409329	10.6575	-6.43592	0.00117855	0.0138356	-1.08313	T
AFF4	0.406606	11.2802	6.43556	0.00117886	0.0138356	-1.08343	T
IL6ST	-0.393329	10.0386	-6.4332	0.00118089	0.0138494	-1.08542	T
FLVCR2	-0.475585	10.4107	-6.42963	0.00118397	0.0138717	-1.08843	T
NT5M	-0.562967	10.1697	-6.42899	0.00118452	0.0138717	-1.08897	T
MACROD2	-0.378354	9.35299	-6.42274	0.00118993	0.013925	-1.09424	T
LOC112533197	-1.60282	5.19617	-6.41927	0.00119293	0.0139398	-1.09716	T
NSUN3	-0.638918	7.36871	-6.41914	0.00119304	0.0139398	-1.09727	T
DERA	-0.494153	7.95882	-6.4183	0.00119378	0.0139398	-1.09798	T
INSIG2	-0.547197	8.65397	-6.41647	0.00119537	0.0139483	-1.09952	T
LOC121107309	-1.17993	4.10439	-6.41392	0.0011976	0.0139505	-1.10168	T
TMEM139	-0.997813	2.01833	-6.41288	0.00119851	0.0139505	-1.10256	T
MCM6	-0.378679	10.9496	-6.41269	0.00119868	0.0139505	-1.10272	T
ITGB1	-0.345796	12.9398	-6.4123	0.00119901	0.0139505	-1.10304	T
PRCP	-0.453206	11.9298	-6.40621	0.00120435	0.0140026	-1.10818	T
LOC121106882	-0.36351	9.00356	-6.40255	0.00120758	0.01403	-1.11128	T
NRBP2	-0.600347	8.84247	-6.39961	0.00121018	0.0140501	-1.11377	T
GK5	0.45589	8.12829	6.39834	0.0012113	0.014053	-1.11484	T
DUSP7	0.434762	10.3899	6.39718	0.00121233	0.0140549	-1.11582	T
E2F7	-0.523488	9.18656	-6.39463	0.00121459	0.0140709	-1.11798	T
KIAA0513	-0.741488	7.47652	-6.39147	0.0012174	0.0140935	-1.12065	T
P2RY14	-1.02392	8.29265	-6.38564	0.00122261	0.0141436	-1.12559	T
EPHX1L	-0.658592	7.52512	-6.38465	0.00122349	0.0141437	-1.12643	T
ATG10	-0.446629	8.16327	-6.38173	0.00122611	0.0141554	-1.1289	T
FAM72A	-0.395924	9.39199	-6.3813	0.0012265	0.0141554	-1.12927	T
ZCCHC8	-0.34877	9.64826	-6.37936	0.00122824	0.0141554	-1.13091	T
HNRNPUL1	-0.318555	11.0979	-6.37914	0.00122845	0.0141554	-1.1311	T
LOC124417794	-1.86864	3.76085	-6.37844	0.00122907	0.0141554	-1.13169	T
LDHA	-0.483366	15.3071	-6.37767	0.00122977	0.0141554	-1.13234	T
ITFG2	0.407656	8.68708	6.37451	0.00123262	0.0141781	-1.13502	T
PPM1D	0.512403	9.35229	6.37142	0.00123541	0.0142002	-1.13764	T
HPSE	-0.405857	8.98125	-6.37005	0.00123665	0.0142036	-1.13881	T
NFU1	0.367358	9.10595	6.36837	0.00123818	0.0142036	-1.14023	T
EPHX1	0.556633	7.94547	6.36819	0.00123835	0.0142036	-1.14039	T
PQLC2	-0.446869	9.29485	-6.36696	0.00123946	0.0142063	-1.14143	T
RNF11	0.436698	10.9342	6.36587	0.00124046	0.0142077	-1.14236	T
ACAP3	0.361215	8.72551	6.36468	0.00124154	0.01421	-1.14337	T
HPS6	0.340809	10.3629	6.36125	0.00124467	0.0142357	-1.14628	T
CDCA2	-0.517004	9.12544	-6.35943	0.00124634	0.0142447	-1.14783	T
ELL2	0.458092	8.22839	6.35054	0.00125451	0.014328	-1.15539	T
IL31RA	-0.705437	9.25616	-6.34371	0.00126082	0.0143899	-1.16119	T
CCL26	-0.665058	9.8706	-6.34043	0.00126387	0.014409	-1.16399	T
ALS2L	-0.675889	6.52783	-6.34	0.00126427	0.014409	-1.16436	T
THBS2	-1.18469	4.95232	-6.33732	0.00126677	0.0144213	-1.16665	T
GSTZ1	-1.29641	5.21893	-6.33679	0.00126726	0.0144213	-1.16709	T
BCORL1	0.560622	9.7151	6.33597	0.00126803	0.0144213	-1.1678	T
TSPO	0.487842	11.3622	6.33113	0.00127256	0.0144548	-1.17192	T
PDXP	0.43977	9.96394	6.33091	0.00127276	0.0144548	-1.1721	T
KDM2B	0.34083	10.5915	6.32644	0.00127697	0.0144901	-1.17592	T
LOC121107995	2.28876	2.24923	6.32538	0.00127797	0.0144901	-1.17683	T
GATD3A	-0.54106	9.75386	-6.32475	0.00127857	0.0144901	-1.17736	T
DSCC1	0.405196	9.04504	6.32271	0.00128049	0.0144996	-1.1791	T
PDCD1	-0.761671	7.4589	-6.32196	0.0012812	0.0144996	-1.17974	T
PPA2	-0.484338	11.0273	-6.32079	0.00128231	0.014502	-1.18075	T
FHOD1	0.371147	9.46702	6.31944	0.00128358	0.0145063	-1.1819	T
MTIF2	-0.416884	8.56763	-6.31749	0.00128543	0.014517	-1.18356	T
EFR3B	-1.28284	7.11693	-6.31386	0.00128889	0.0145459	-1.18666	T
NCAPD2	-0.359194	11.0491	-6.31252	0.00129016	0.0145501	-1.18781	T
SULF2	-0.345779	11.2526	-6.30934	0.0012932	0.0145742	-1.19053	T
DOK1	-0.431485	9.41352	-6.30612	0.00129628	0.0145988	-1.19329	T
PRKACB	-0.399614	11.2702	-6.30481	0.00129754	0.0146027	-1.1944	T
TIPARP	0.454718	8.73152	6.30321	0.00129907	0.0146098	-1.19577	T
E2F5	0.493274	9.65094	6.29942	0.00130273	0.0146407	-1.19902	T
LOC772071	-0.301868	11.548	-6.29779	0.0013043	0.0146482	-1.20041	T
LOC429682	-1.29186	7.24359	-6.29627	0.00130577	0.0146545	-1.20172	T
DAPK1	0.462641	10.0191	6.29446	0.00130751	0.0146593	-1.20326	T
FERMT2	0.383908	10.5082	6.29395	0.00130801	0.0146593	-1.2037	T
IGSF1	-0.611142	7.68581	-6.29209	0.00130981	0.0146693	-1.20529	T
LOC101747302	-0.764208	7.20115	-6.28865	0.00131316	0.0146963	-1.20825	T
SULT1E1	0.41604	9.11846	6.28775	0.00131404	0.0146963	-1.20902	T
SLC10A7	0.36535	11.5835	6.28605	0.00131569	0.0147046	-1.21047	T
NKD1	0.83292	5.61871	6.28387	0.00131782	0.0147183	-1.21235	T
MTHFS	-1.0426	5.77797	-6.28071	0.00132091	0.0147426	-1.21505	T
CAPN11	0.406017	11.8868	6.27639	0.00132516	0.0147699	-1.21877	T
LOC124417348	1.79134	2.79214	6.27636	0.00132519	0.0147699	-1.21879	T
COL13A1	1.21268	6.83139	6.27087	0.00133059	0.0148199	-1.2235	T
LOC107049145	2.04193	2.47394	6.26464	0.00133677	0.0148785	-1.22887	T
CKAP4	-0.316808	11.6846	-6.26311	0.00133829	0.0148813	-1.23018	T
STK38L	-0.523324	10.0769	-6.26253	0.00133887	0.0148813	-1.23068	T
EPB41L1	-0.429125	10.6264	-6.25994	0.00134146	0.0148904	-1.23291	T
NEFM	-1.04483	6.04383	-6.25962	0.00134177	0.0148904	-1.23318	T
VDR	0.630526	8.81364	6.25894	0.00134245	0.0148904	-1.23377	T
ABHD17C	0.514462	9.6541	6.25485	0.00134655	0.014905	-1.23729	T
RNF213	-0.594649	11.4646	-6.25358	0.00134781	0.014905	-1.23838	T
MST1	0.68405	7.22404	6.25332	0.00134808	0.014905	-1.23861	T
NOD1	-0.431134	9.80634	-6.25304	0.00134836	0.014905	-1.23884	T
PRKCDBP	-3.10204	2.90021	-6.25303	0.00134837	0.014905	-1.23886	T
HEBP1	-0.481238	10.1624	-6.24989	0.00135152	0.0149296	-1.24156	T
NRP2	0.436704	12.156	6.24877	0.00135266	0.0149319	-1.24253	T
MTA1	0.31028	11.0863	6.24535	0.00135611	0.0149598	-1.24548	T
AvBD1	0.647145	13.4466	6.24434	0.00135713	0.0149608	-1.24634	T
FOXK2	0.447309	10.2621	6.24089	0.00136062	0.0149891	-1.24931	T
GPD1L	-0.316405	12.1513	-6.23887	0.00136267	0.0150015	-1.25106	T
INPP4A	-0.41262	10.2519	-6.23609	0.00136551	0.0150224	-1.25346	T
IPCEF1	-0.531833	7.3527	-6.22741	0.00137438	0.0151098	-1.26096	T
FAM46D	1.75084	1.42417	6.22157	0.0013804	0.0151613	-1.26601	T
LOC101749531	-0.542628	10.7242	-6.22103	0.00138095	0.0151613	-1.26647	T
ORAI1	0.431329	9.266	6.21745	0.00138466	0.0151917	-1.26957	T
C18orf32	0.342337	10.2026	6.2159	0.00138626	0.015199	-1.27091	T
CMIP	-0.370822	10.4647	-6.21163	0.00139069	0.0152373	-1.2746	T
BBS2	0.346086	8.68137	6.20844	0.00139402	0.0152634	-1.27737	T
LOC121108806	0.601956	6.79468	6.20553	0.00139706	0.0152864	-1.27989	T
UNC119B	0.405738	10.6623	6.19923	0.00140367	0.0153483	-1.28535	T
AMPD3	0.387816	10.0489	6.19751	0.00140548	0.0153577	-1.28684	T
LOC416197	0.78287	7.29522	6.19397	0.00140922	0.0153881	-1.28991	T
TAF9	0.66718	9.08988	6.19239	0.00141089	0.0153959	-1.29128	T
B3GALNT1	-0.529727	8.1154	-6.18879	0.00141471	0.0154272	-1.2944	T
PGM3	0.367698	9.78719	6.18522	0.00141851	0.0154582	-1.29751	T
C3H8ORF80	-0.426252	10.3786	-6.18275	0.00142114	0.0154765	-1.29965	T
JAK3	1.19182	6.22715	6.18132	0.00142267	0.0154776	-1.3009	T
HELLS	-0.467547	10.4539	-6.18086	0.00142316	0.0154776	-1.3013	T
MCC	-0.524537	10.1276	-6.1792	0.00142494	0.0154865	-1.30274	T
ABLIM3	-1.53426	3.45525	-6.17813	0.00142609	0.0154886	-1.30367	T
SMAD3	-0.637044	7.45225	-6.17658	0.00142775	0.0154962	-1.30502	T
ANKRD28	-0.313324	9.68372	-6.17452	0.00142997	0.0154988	-1.30681	T
FBXL5	0.423251	10.4427	6.17371	0.00143084	0.0154988	-1.30752	T
BCAS1	-1.85672	1.19461	-6.17368	0.00143087	0.0154988	-1.30754	T
ZFAND3	0.350801	9.58084	6.17162	0.00143309	0.0155036	-1.30933	T
IGSF9	0.335209	9.01973	6.17111	0.00143364	0.0155036	-1.30978	T
RABL2A	0.471397	7.67914	6.17055	0.00143424	0.0155036	-1.31026	T
ANKRD29	1.77887	3.92301	6.16971	0.00143514	0.0155036	-1.31099	T
MAF	-1.45018	5.97452	-6.16792	0.00143708	0.0155141	-1.31255	T
CCDC173	-0.504078	12.3626	-6.16449	0.0014408	0.0155439	-1.31554	T
TMEM222	0.448376	9.55166	6.15711	0.00144883	0.0156116	-1.32197	T
LOC107054921	-0.969388	6.33159	-6.15588	0.00145017	0.0156116	-1.32304	T
LOC112531224	-2.43239	1.99661	-6.15553	0.00145057	0.0156116	-1.32335	T
FAM8A1	0.451072	8.89911	6.15518	0.00145094	0.0156116	-1.32365	T
SREK1	-0.47517	10.8643	-6.1508	0.00145575	0.0156529	-1.32748	T
LOC107056253	0.939447	6.33529	6.14902	0.0014577	0.0156635	-1.32903	T
PLCH2	-0.577039	5.16722	-6.14741	0.00145947	0.0156721	-1.33043	T
AKIRIN2	0.299786	11.4114	6.14643	0.00146056	0.0156733	-1.33129	T
HIP1	-0.45933	9.18734	-6.14159	0.0014659	0.0157129	-1.33551	T
SCIN	0.363752	10.9905	6.13876	0.00146904	0.0157129	-1.33799	T
SLC52A3	0.349848	9.37319	6.13848	0.00146934	0.0157129	-1.33823	T
CNN2	0.346715	9.86561	6.13798	0.0014699	0.0157129	-1.33867	T
SARAF	-0.317586	11.4438	-6.13735	0.0014706	0.0157129	-1.33922	T
NR3C2	-0.554983	9.20446	-6.13697	0.00147103	0.0157129	-1.33956	T
LOC101751855	1.98184	4.56594	6.13648	0.00147157	0.0157129	-1.33998	T
LOC107050638	0.791919	6.60314	6.13608	0.00147202	0.0157129	-1.34033	T
SELENOI	0.390174	10.1687	6.13403	0.0014743	0.0157268	-1.34212	T
HJURP	-0.603419	8.81785	-6.13162	0.00147699	0.0157452	-1.34423	T
TRIM28	0.3376	9.13213	6.12593	0.00148336	0.0157933	-1.34921	T
SLC46A3	-0.639401	6.41189	-6.12584	0.00148346	0.0157933	-1.34929	T
IQSEC3	0.574612	6.17022	6.12302	0.00148664	0.0158167	-1.35176	T
ITGAD	0.669787	9.1208	6.12022	0.00148979	0.0158398	-1.35421	T
HAUS6	-0.396828	10.3272	-6.11758	0.00149277	0.0158559	-1.35652	T
LOC121108712	1.58928	1.04464	6.11715	0.00149326	0.0158559	-1.3569	T
SREBF1	0.417062	10.5632	6.11253	0.0014985	0.0158936	-1.36095	T
LPAR2	0.548133	8.94512	6.11228	0.00149878	0.0158936	-1.36117	T
PYGL	-0.359727	10.6944	-6.1098	0.0015016	0.0159016	-1.36334	T
LOC107054851	-0.660179	5.06987	-6.10854	0.00150303	0.0159016	-1.36444	T
LOC100859898	-1.17819	3.60821	-6.10741	0.00150432	0.0159016	-1.36543	T
LOC112532054	2.26638	4.54864	6.10693	0.00150488	0.0159016	-1.36586	T
PPARGC1B	0.576061	8.4625	6.10675	0.00150508	0.0159016	-1.36602	T
AURKB	-0.375935	10.3343	-6.10643	0.00150544	0.0159016	-1.36629	T
PTP4A3	0.356083	8.81959	6.10493	0.00150717	0.0159094	-1.36762	T
SCFD1	-0.429994	9.64753	-6.09673	0.00151657	0.0159802	-1.37481	T
HSPD1	0.375512	11.7883	6.09653	0.00151681	0.0159802	-1.37499	T
PTBP1	-0.353603	12.6274	-6.0958	0.00151765	0.0159802	-1.37564	T
SLK	-0.639243	12.3231	-6.09564	0.00151783	0.0159802	-1.37577	T
EMILIN1	0.408205	10.3582	6.09159	0.00152251	0.016019	-1.37933	T
HMGB2	-0.342705	11.2149	-6.08994	0.00152443	0.0160288	-1.38078	T
DMBX1	-0.471891	7.25234	-6.08408	0.00153124	0.0160899	-1.38594	T
TARP	0.505957	9.76578	6.08313	0.00153234	0.0160911	-1.38677	T
OPTN	0.316444	11.266	6.08117	0.00153463	0.0161044	-1.3885	T
LOC124417718	-2.62317	1.57784	-6.08033	0.00153561	0.0161044	-1.38924	T
BACH1	-0.473497	10.1337	-6.07777	0.00153861	0.0161255	-1.39149	T
VGLL4	0.386501	10.9462	6.07394	0.0015431	0.0161621	-1.39486	T
PYGB	-0.378271	9.17893	-6.06931	0.00154855	0.0162086	-1.39894	T
KIAA1671	0.501254	8.93266	6.06752	0.00155067	0.0162203	-1.40052	T
CTSB	-0.691114	10.8422	-6.06509	0.00155355	0.0162399	-1.40267	T
MMR1L3	-2.84056	2.17763	-6.0642	0.0015546	0.0162404	-1.40345	T
RFLNB	0.368288	7.24041	6.05811	0.00156185	0.0163056	-1.40883	T
MEF2A	0.402871	9.73052	6.05518	0.00156534	0.0163243	-1.41141	T
TACC3	-0.527211	10.9682	-6.05492	0.00156566	0.0163243	-1.41165	T
RASGEF1A	0.322199	12.3578	6.05112	0.00157021	0.0163612	-1.415	T
LOC121106551	-1.49957	2.58906	-6.04716	0.00157497	0.0164002	-1.4185	T
TPM4	0.440131	9.79699	6.04572	0.00157671	0.0164077	-1.41977	T
LOC422320	-1.43335	3.507	-6.04473	0.0015779	0.0164095	-1.42065	T
PARPBP	-0.391906	7.80095	-6.04349	0.0015794	0.0164145	-1.42174	T
LOC107050163	0.474067	8.85255	6.04098	0.00158243	0.0164355	-1.42396	T
EIF4E3	0.457459	8.26182	6.03914	0.00158466	0.0164451	-1.42559	T
CSGALNACT2	0.3599	10.1837	6.03854	0.00158539	0.0164451	-1.42613	T
HNRNPLL	-0.417193	9.58136	-6.03637	0.00158803	0.0164619	-1.42805	T
PPP1R12B	0.44991	9.08057	6.03337	0.00159168	0.0164892	-1.4307	T
SMIM18	-0.746945	8.22235	-6.02948	0.00159643	0.0165278	-1.43415	T
FANCL	-0.428704	9.15362	-6.02673	0.0015998	0.0165521	-1.43659	T
LOC100859549	1.88813	5.34071	6.02554	0.00160126	0.0165566	-1.43764	T
CDC20	0.346159	9.96274	6.01858	0.00160983	0.0166346	-1.44381	T
RIN3	-0.520892	8.99968	-6.01437	0.00161504	0.0166678	-1.44755	T
LOC107050335	0.724911	6.60787	6.01432	0.00161511	0.0166678	-1.4476	T
RGS19	-0.384657	10.5025	-6.01005	0.00162041	0.0167118	-1.45138	T
RNH1	0.330151	12.3365	6.00389	0.00162811	0.0167805	-1.45686	T
MTMR9LP	0.46134	8.61248	6.0023	0.0016301	0.0167903	-1.45827	T
FDX1	0.358179	8.76663	5.99418	0.00164032	0.0168817	-1.4655	T
ENAH	0.396143	9.51595	5.99359	0.00164106	0.0168817	-1.46602	T
PDP2	0.311668	9.79699	5.99253	0.0016424	0.0168848	-1.46697	T
FAM126A	-0.353446	10.752	-5.99164	0.00164352	0.0168856	-1.46776	T
SCNM1	0.444772	9.75009	5.98429	0.00165286	0.0169617	-1.4743	T
CD74	0.473352	14.3134	5.98416	0.00165303	0.0169617	-1.47442	T
SYBU	-0.457788	6.074	-5.98153	0.00165639	0.0169854	-1.47677	T
TBX6	-0.759992	8.1204	-5.97118	0.00166967	0.0171083	-1.486	T
LOC121110509	1.42262	1.12797	5.97054	0.0016705	0.0171083	-1.48658	T
GYPC	-0.419662	11.4418	-5.96384	0.00167916	0.0171854	-1.49255	T
CTBS	-0.343201	9.13501	-5.96308	0.00168015	0.0171854	-1.49324	T
LOC107056277	-0.736639	4.70574	-5.9575	0.00168742	0.0172489	-1.49823	T
LOC101748113	2.06825	1.20079	5.95465	0.00169114	0.0172582	-1.50077	T
EDEM2	-0.315758	8.70173	-5.95341	0.00169276	0.0172582	-1.50188	T
SP5	0.77477	8.46258	5.95282	0.00169354	0.0172582	-1.50241	T
TSPAN14	0.432039	9.66331	5.9528	0.00169356	0.0172582	-1.50243	T
LOC124418405	-0.504206	6.01098	-5.95272	0.00169368	0.0172582	-1.50251	T
LOC107053397	1.27151	0.635756	5.95087	0.00169611	0.017271	-1.50416	T
SNX5	-0.544545	7.93233	-5.95013	0.00169707	0.017271	-1.50482	T
LOC416147	-0.320502	10.1894	-5.93781	0.00171336	0.0174258	-1.51586	T
FAM53A	0.416407	9.26838	5.93695	0.0017145	0.0174264	-1.51663	T
GNAI3	-0.346372	11.9528	-5.93034	0.00172331	0.017505	-1.52256	T
AP1S2	-0.317562	11.6123	-5.92866	0.00172557	0.0175169	-1.52407	T
CCNJL	0.315747	10.1258	5.92441	0.00173128	0.0175557	-1.52788	T
PISD	0.365776	9.79796	5.92419	0.00173157	0.0175557	-1.52808	T
ALMS1	-0.43002	10.8551	-5.9186	0.00173911	0.0176212	-1.5331	T
TATDN3	0.347067	9.5945	5.91399	0.00174536	0.0176612	-1.53725	T
ST6GAL1	0.309031	13.0305	5.91328	0.00174632	0.0176612	-1.53788	T
ALDH6A1	-0.400419	8.07926	-5.91327	0.00174634	0.0176612	-1.5379	T
CXCL13L3	4.34701	2.9975	5.91246	0.00174744	0.0176612	-1.53862	T
RNF150	0.533258	7.78348	5.91155	0.00174868	0.0176627	-1.53944	T
MED12	0.324864	10.965	5.90992	0.00175089	0.0176741	-1.5409	T
LURAP1	0.632842	6.56118	5.90899	0.00175217	0.0176759	-1.54175	T
LOC100857333	-1.19578	6.6358	-5.90814	0.00175332	0.0176765	-1.54251	T
CHD1L	-0.377956	9.02064	-5.90533	0.00175717	0.0177	-1.54504	T
SPOPL	0.395498	10.4709	5.90484	0.00175784	0.0177	-1.54548	T
SYTL2	-1.64183	5.09167	-5.90233	0.00176128	0.0177236	-1.54774	T
LOC101750701	0.463028	8.53636	5.90145	0.00176249	0.0177247	-1.54853	T
MTPN	-0.328026	13.2731	-5.89937	0.00176535	0.0177385	-1.55041	T
LOC121109679	-1.78895	1.16073	-5.89886	0.00176606	0.0177385	-1.55087	T
LOC107053801	-3.55439	2.29136	-5.8975	0.00176792	0.0177462	-1.55209	T
RAD51AP1	-0.895729	6.83327	-5.89536	0.00177087	0.0177648	-1.55402	T
ANKFY1	-0.370396	10.3556	-5.89311	0.00177399	0.0177814	-1.55605	T
SLC38A6	-0.436847	8.31776	-5.89257	0.00177473	0.0177814	-1.55654	T
MNS1	0.676468	7.11151	5.88845	0.00178045	0.0178085	-1.56025	T
LOC107050955	0.587608	13.1791	5.88751	0.00178176	0.0178085	-1.5611	T
NDEL1	0.464305	8.39033	5.8875	0.00178177	0.0178085	-1.56111	T
LOC101747295	-0.459007	4.82027	-5.88724	0.00178214	0.0178085	-1.56135	T
CASP3	-0.331159	9.44826	-5.88646	0.00178323	0.0178085	-1.56205	T
CA13	0.741109	7.45795	5.88587	0.00178405	0.0178085	-1.56258	T
SLC45A3	-0.312898	10.999	-5.88444	0.00178603	0.0178173	-1.56387	T
FAM136A	-0.614283	8.03992	-5.8788	0.00179393	0.0178851	-1.56897	T
PRDM15	0.509406	10.5667	5.87207	0.0018034	0.0179684	-1.57505	T
LOC416530	-0.298937	8.82429	-5.87072	0.0018053	0.0179762	-1.57627	T
MTURN	0.419906	10.1201	5.86921	0.00180744	0.0179846	-1.57764	T
FAM188B	-0.662094	6.78093	-5.86856	0.00180836	0.0179846	-1.57823	T
VHL	0.406781	10.739	5.86741	0.00180998	0.0179896	-1.57926	T
TMEM255A	-0.400927	10.7054	-5.86652	0.00181124	0.0179896	-1.58007	T
NPEPPS	0.548715	11.2047	5.86584	0.0018122	0.0179896	-1.58068	T
CYLY	-2.16166	1.08083	-5.86226	0.0018173	0.0180291	-1.58393	T
TP53	0.600921	8.60551	5.85976	0.00182087	0.018049	-1.58619	T
DBF4B	-0.459538	7.5798	-5.85929	0.00182154	0.018049	-1.58662	T
CAT	-0.582334	8.74745	-5.85792	0.00182349	0.0180518	-1.58785	T
RAD51	-0.37915	9.84917	-5.85752	0.00182406	0.0180518	-1.58822	T
GIT1	0.324644	10.3272	5.85542	0.00182706	0.0180611	-1.59012	T
COLEC12	-2.55298	1.54274	-5.85496	0.00182773	0.0180611	-1.59054	T
PTGR2	-0.296474	9.21245	-5.85453	0.00182835	0.0180611	-1.59093	T
DGAT2	0.487416	9.66777	5.84841	0.00183714	0.0181369	-1.59647	T
LOC121108002	1.87775	4.46818	5.84617	0.00184037	0.0181577	-1.59851	T
LOC101751536	-2.3815	3.33025	-5.84458	0.00184268	0.0181693	-1.59995	T
SEPTIN12	-0.363312	9.59954	-5.83929	0.00185036	0.0182339	-1.60476	T
ZC2HC1A	-0.326366	7.77234	-5.83628	0.00185473	0.0182659	-1.60748	T
FUT4	0.516955	9.35773	5.8345	0.00185734	0.0182804	-1.60911	T
WDSUB1	0.353199	9.5078	5.82836	0.00186633	0.0183526	-1.61469	T
TRAPPC4	0.513177	9.12039	5.82794	0.00186694	0.0183526	-1.61507	T
ETV6	0.673951	9.57239	5.82525	0.0018709	0.0183803	-1.61751	T
CAV1	-1.0877	5.45235	-5.8215	0.00187643	0.0184234	-1.62092	T
PDHX	0.38789	9.501	5.818	0.00188161	0.0184463	-1.62411	T
FZD7	0.371445	8.63988	5.8176	0.00188221	0.0184463	-1.62448	T
ZNF800	0.494272	9.98751	5.81758	0.00188223	0.0184463	-1.62449	T
HIST1H101	0.409867	7.86855	5.81685	0.00188332	0.0184463	-1.62516	T
GIMAP1-GIMAP5	-0.506297	8.96429	-5.81325	0.00188868	0.0184728	-1.62844	T
NPAS2	-0.958097	6.19697	-5.81315	0.00188883	0.0184728	-1.62853	T
LOC121108025	-0.444115	10.9266	-5.81272	0.00188946	0.0184728	-1.62892	T
LOC121107447	0.290997	11.4892	5.81021	0.00189321	0.0184982	-1.63121	T
P2RY13	-1.26178	6.8192	-5.80887	0.00189521	0.0185066	-1.63243	T
TFG	0.342278	10.2712	5.80673	0.00189842	0.0185268	-1.63438	T
KCNG3	-1.93241	2.26078	-5.80373	0.00190292	0.0185579	-1.63712	T
RAB43	0.361028	9.76586	5.80307	0.0019039	0.0185579	-1.63772	T
CHST3	-0.924274	4.7384	-5.79875	0.00191042	0.0186102	-1.64167	T
SLC24A2	-0.679472	6.86868	-5.79791	0.00191168	0.0186113	-1.64243	T
SMAGP	0.708077	7.158	5.79147	0.00192145	0.0186951	-1.64832	T
WDFY3	-0.455787	11.9502	-5.79033	0.00192318	0.0187007	-1.64936	T
BEST4	0.865953	4.04793	5.78185	0.00193613	0.0188153	-1.65711	T
DAZAP2	0.567502	8.88687	5.78087	0.00193764	0.0188186	-1.65801	T
LYPD1	0.626949	6.45222	5.76538	0.00196157	0.0190321	-1.67219	T
GJA3	-1.63938	4.22966	-5.76489	0.00196233	0.0190321	-1.67264	T
DGKH	0.468813	10.0833	5.76308	0.00196516	0.0190321	-1.67431	T
TWSG1	-0.331966	8.84656	-5.76291	0.00196542	0.0190321	-1.67446	T
ZNF516	-0.406884	9.86282	-5.76286	0.00196551	0.0190321	-1.67451	T
BEND6	0.479285	7.84746	5.75977	0.00197032	0.0190603	-1.67733	T
BUB1B	-0.389419	10.1241	-5.75896	0.00197159	0.0190603	-1.67808	T
LRRC18	2.16309	1.69529	5.75873	0.00197196	0.0190603	-1.67829	T
TMEM245	0.300397	10.3244	5.75427	0.00197896	0.0191166	-1.68239	T
LOC112531329	-1.77369	2.71038	-5.7509	0.00198426	0.0191563	-1.68548	T
GALNT16	0.449261	7.84112	5.74553	0.00199276	0.0192268	-1.69041	T
RAB3IL1	-0.386815	11.3367	-5.74459	0.00199426	0.0192299	-1.69128	T
ARHGAP26	-0.349993	10.3624	-5.74368	0.00199569	0.0192322	-1.69211	T
ALOX5	-0.519493	10.8251	-5.74073	0.00200038	0.0192659	-1.69482	T
SSU72	0.42614	9.65877	5.7388	0.00200346	0.0192753	-1.6966	T
MCF2L2	-0.706361	4.58637	-5.73822	0.0020044	0.0192753	-1.69714	T
CDK17	-0.318309	10.0138	-5.73724	0.00200596	0.0192753	-1.69804	T
LOC107051583	0.388435	7.94485	5.73714	0.00200613	0.0192753	-1.69814	T
MYBL2	-0.346125	10.1576	-5.73494	0.00200964	0.0192926	-1.70016	T
KIF2C	-0.408489	9.66089	-5.73452	0.00201031	0.0192926	-1.70054	T
ATP6V1E1	-0.272721	10.9688	-5.73162	0.00201497	0.0193258	-1.70322	T
LDHB	-0.403426	11.8974	-5.72997	0.00201762	0.0193397	-1.70473	T
RSPO1	-0.597878	6.73657	-5.72316	0.00202862	0.0194336	-1.71101	T
UBR7	-0.337665	11.302	-5.72094	0.0020322	0.0194564	-1.71305	T
LACTB	0.308039	9.768	5.71745	0.00203787	0.0194832	-1.71627	T
SLC9A9	-1.09445	5.33425	-5.71734	0.00203806	0.0194832	-1.71637	T
ABCB1LA	-1.98599	0.992996	-5.717	0.00203862	0.0194832	-1.71669	T
FNTA	-0.361345	8.8633	-5.71483	0.00204215	0.0195054	-1.71869	T
SLC38A1	-0.346297	12.1759	-5.71037	0.00204944	0.0195635	-1.7228	T
DUS2	-0.344895	8.69358	-5.70887	0.00205189	0.0195754	-1.72419	T
NPC2	-0.390094	11.0451	-5.70743	0.00205426	0.0195863	-1.72552	T
MTHFD2	0.391329	9.36772	5.70619	0.0020563	0.019591	-1.72667	T
KCNQ5	1.10746	5.77773	5.70545	0.00205752	0.019591	-1.72735	T
LOC107057318	0.365604	9.69809	5.70493	0.00205838	0.019591	-1.72783	T
ANP32A	0.311882	10.5147	5.70092	0.002065	0.0196424	-1.73154	T
LOC124417256	-1.4633	3.58527	-5.69929	0.00206769	0.0196454	-1.73305	T
TM4SF1	-0.394449	5.53292	-5.69926	0.00206775	0.0196454	-1.73308	T
GPATCH1	-0.41084	8.50912	-5.69849	0.00206902	0.019646	-1.73379	T
MTR	-0.373644	9.7331	-5.69669	0.00207201	0.0196617	-1.73545	T
VTCN1L	-0.46308	6.20579	-5.6959	0.00207331	0.0196617	-1.73618	T
FAM196A	-0.538346	5.27157	-5.69529	0.00207433	0.0196617	-1.73675	T
BHLHE22	0.502652	9.36483	5.69329	0.00207764	0.0196816	-1.73859	T
DHRS7B	0.401445	9.37238	5.69212	0.0020796	0.0196886	-1.73968	T
ARHGAP11B	-0.35141	10.1201	-5.68763	0.0020871	0.019748	-1.74384	T
LMF2	-0.35528	12.8968	-5.68415	0.00209294	0.0197826	-1.74706	T
MITD1	-0.356783	8.49896	-5.68399	0.0020932	0.0197826	-1.74721	T
ALOX15B	3.22509	2.8459	5.6771	0.00210482	0.0198808	-1.7536	T
HES1	-0.540277	7.19875	-5.67366	0.00211063	0.019924	-1.75678	T
TRUB1	0.53844	8.32839	5.67214	0.00211323	0.0199288	-1.7582	T
BAZ2A	0.454982	12.0902	5.67192	0.0021136	0.0199288	-1.75841	T
GIN1	-0.635384	6.61186	-5.66982	0.00211716	0.0199507	-1.76035	T
ASB5	0.51304	7.50536	5.66601	0.00212366	0.0200003	-1.76389	T
UBTF	0.362245	11.2592	5.66476	0.0021258	0.0200087	-1.76505	T
CD226	-0.640433	6.69648	-5.6612	0.00213189	0.0200486	-1.76836	T
LMOD1	2.11706	1.80435	5.66079	0.0021326	0.0200486	-1.76874	T
LOC107049469	1.22868	4.94352	5.66012	0.00213375	0.0200486	-1.76936	T
LOC124417204	-1.51295	1.28897	-5.65698	0.00213915	0.0200876	-1.77228	T
TUBA5	-0.363708	10.7543	-5.65388	0.00214449	0.0201261	-1.77516	T
EGLN3	0.531039	9.58123	5.65308	0.00214588	0.0201274	-1.77591	T
TLR3	-1.83292	5.5034	-5.64984	0.00215148	0.0201683	-1.77892	T
ATP6V1H	0.297765	9.93768	5.64808	0.00215455	0.0201853	-1.78057	T
SEC11C	0.417473	9.95221	5.64733	0.00215584	0.0201857	-1.78126	T
LOC121107943	0.845002	7.57653	5.64538	0.00215923	0.0202017	-1.78307	T
VWA5B1	-0.69042	5.85834	-5.64491	0.00216005	0.0202017	-1.78351	T
CCR4	-0.869881	3.13788	-5.63903	0.00217034	0.020286	-1.789	T
LOC422150	-0.640291	5.26303	-5.63832	0.00217157	0.020286	-1.78965	T
APH1A	0.336812	8.35921	5.63468	0.00217797	0.0203325	-1.79305	T
JARID2	0.45875	8.52005	5.63406	0.00217906	0.0203325	-1.79363	T
ATP6V1C2	-0.663632	8.31867	-5.63258	0.00218167	0.0203357	-1.79501	T
APAF1	-0.344763	8.43525	-5.63243	0.00218192	0.0203357	-1.79514	T
LOC417067	1.26942	0.884712	5.62818	0.00218945	0.0203781	-1.79912	T
NEIL3	-0.363469	7.60616	-5.62777	0.00219016	0.0203781	-1.79949	T
EFHD1	-0.338407	10.6932	-5.62772	0.00219026	0.0203781	-1.79955	T
LOC112533465	0.499495	4.33731	5.62466	0.00219567	0.0204167	-1.8024	T
MCTP2	0.688187	8.26737	5.62293	0.00219876	0.0204318	-1.80402	T
TNFRSF1A	-0.835766	7.26912	-5.62233	0.00219982	0.0204318	-1.80457	T
FYTTD1L	1.42145	5.74825	5.60812	0.00222528	0.0206486	-1.81786	T
SLF2	-0.348882	9.47038	-5.60788	0.00222572	0.0206486	-1.81809	T
LOC121107292	-0.904632	5.56302	-5.60626	0.00222864	0.0206638	-1.8196	T
CHPT1	-0.269609	10.7435	-5.5969	0.00224563	0.0207996	-1.82837	T
TESPA1	0.490631	10.8714	5.59677	0.00224586	0.0207996	-1.82849	T
CARF	0.363774	8.94489	5.5937	0.00225147	0.0208397	-1.83137	T
MAST2	-0.350806	9.66784	-5.58888	0.00226031	0.0209095	-1.83589	T
PARP9	-0.356978	8.61196	-5.58573	0.0022661	0.020951	-1.83884	T
LRRC75A	-0.700873	7.46982	-5.58492	0.0022676	0.0209529	-1.83961	T
MZT1	-0.506126	7.91616	-5.58212	0.00227276	0.0209822	-1.84223	T
FAM210B	0.40039	9.49837	5.5818	0.00227336	0.0209822	-1.84254	T
SMAD7	0.392677	9.31162	5.57654	0.00228311	0.021057	-1.84748	T
AvBD8	2.14119	4.35585	5.57602	0.00228407	0.021057	-1.84796	T
NUCB2	-0.351918	12.6983	-5.57483	0.00228629	0.0210601	-1.84908	T
TRIM41	0.387385	9.64032	5.57444	0.00228702	0.0210601	-1.84945	T
POU4F2	1.39123	5.33625	5.57087	0.00229367	0.0211093	-1.8528	T
LOC121106674	0.639872	7.95508	5.56939	0.00229645	0.0211229	-1.8542	T
BCO2	2.52574	1.42954	5.56553	0.00230369	0.0211774	-1.85783	T
MAP3K1	-0.29249	10.0179	-5.56257	0.00230925	0.0212045	-1.86062	T
SH3BP5	0.713503	7.30534	5.56257	0.00230925	0.0212045	-1.86062	T
LOC101749719	-0.446111	7.43064	-5.56138	0.00231149	0.0212129	-1.86174	T
COL6A3	-0.681599	10.6025	-5.55962	0.00231481	0.0212245	-1.86339	T
KCNH4	0.488915	7.05068	5.55932	0.00231537	0.0212245	-1.86368	T
TAF15	-0.344787	9.20396	-5.55668	0.00232038	0.0212496	-1.86617	T
MARVELD1	0.431993	9.33066	5.55642	0.00232088	0.0212496	-1.86642	T
RBM38	0.655884	7.91319	5.55579	0.00232206	0.0212496	-1.86701	T
LOC107049819	1.35019	4.90967	5.55357	0.00232628	0.0212762	-1.8691	T
MIF	-0.528963	11.5846	-5.55263	0.00232806	0.0212764	-1.86998	T
PHKG1	0.351587	10.0796	5.55217	0.00232894	0.0212764	-1.87042	T
FNIP1	0.295759	12.1551	5.55052	0.00233207	0.021293	-1.87197	T
HK1	-0.308249	11.777	-5.54588	0.00234094	0.0213542	-1.87635	T
DMRT2	-0.460443	8.40955	-5.545	0.00234262	0.0213542	-1.87718	T
ATP6V0C	-0.454296	11.5476	-5.54494	0.00234274	0.0213542	-1.87724	T
CKAP2L	-0.47981	9.25677	-5.54021	0.00235182	0.0214249	-1.8817	T
LOC121107607	1.98067	4.85367	5.5376	0.00235685	0.0214586	-1.88417	T
ITPK1	0.417131	9.99516	5.53317	0.0023654	0.0215244	-1.88835	T
C2H9ORF30	-0.482041	7.91122	-5.53066	0.00237028	0.0215566	-1.89073	T
MTHFD1	-0.591089	9.88153	-5.5263	0.00237876	0.0216216	-1.89485	T
AATK	0.399924	9.52807	5.52132	0.00238849	0.0216978	-1.89956	T
LOC107049770	0.533662	6.3611	5.5163	0.00239835	0.0217751	-1.90431	T
SNX19	0.43327	8.31476	5.51522	0.00240048	0.0217811	-1.90534	T
WBP2	0.504982	8.2265	5.5146	0.00240171	0.0217811	-1.90593	T
RABGAP1L	-0.398484	9.95788	-5.51316	0.00240454	0.0217917	-1.90729	T
SDC4	0.524393	8.02605	5.51264	0.00240557	0.0217917	-1.90778	T
MSL2	-0.32068	9.68067	-5.51103	0.00240875	0.0218083	-1.90931	T
HAUS1	-0.421455	7.89877	-5.50776	0.00241523	0.0218547	-1.9124	T
MSH6	-0.327865	10.2042	-5.50454	0.00242163	0.0219003	-1.91546	T
USP1	-0.362275	11.1228	-5.50215	0.0024264	0.0219313	-1.91773	T
CDCA3	-0.508063	9.24687	-5.50018	0.00243034	0.0219546	-1.9196	T
P2RY8	-2.29987	3.53553	-5.49848	0.00243374	0.021973	-1.92122	T
RFC5	-0.373121	10.4022	-5.49757	0.00243555	0.0219771	-1.92208	T
SPHKAP	0.69544	8.79329	5.49242	0.0024459	0.0220489	-1.92697	T
METTL10	-0.58733	6.16818	-5.49226	0.00244624	0.0220489	-1.92713	T
SCML2	-0.667912	7.35138	-5.49024	0.0024503	0.0220731	-1.92904	T
GNL2	-0.364223	10.8591	-5.48853	0.00245376	0.022092	-1.93067	T
CLEC5A	0.919336	7.52447	5.48616	0.00245856	0.0221229	-1.93292	T
PIH1D3	0.484573	8.67168	5.48522	0.00246047	0.0221278	-1.93382	T
LOC112530829	1.83758	3.29984	5.48317	0.00246463	0.0221529	-1.93577	T
UBE2V1	-0.280941	10.1577	-5.4822	0.00246659	0.0221582	-1.93669	T
CD72L2	1.32345	4.60221	5.47916	0.00247278	0.0222014	-1.93958	T
LOC121110557	1.25	2.38989	5.47608	0.00247908	0.0222457	-1.94252	T
PLBD2	-0.376033	10.8667	-5.46057	0.00251106	0.0225201	-1.9573	T
LOC107055327	-1.56537	3.80675	-5.45674	0.00251902	0.022579	-1.96096	T
GRAMD1B	0.534813	9.2637	5.45185	0.00252923	0.0226579	-1.96562	T
LOC422276	-0.466125	8.36996	-5.4507	0.00253165	0.022667	-1.96672	T
GATAD2A	-0.373011	10.2659	-5.4493	0.00253458	0.0226807	-1.96806	T
CDK6	-0.549895	12.2993	-5.448	0.00253731	0.0226925	-1.9693	T
METTL18	0.289944	8.53541	5.44733	0.00253873	0.0226927	-1.96995	T
LOC124417205	0.629819	5.43675	5.44647	0.00254054	0.0226963	-1.97077	T
RCBTB1	-0.358015	9.94291	-5.44276	0.00254835	0.0227482	-1.97431	T
TMEM192	-0.417165	7.62914	-5.44238	0.00254916	0.0227482	-1.97467	T
WWP1	-0.711058	8.2182	-5.43799	0.00255845	0.022806	-1.97887	T
ZDHHC20	0.319629	9.75276	5.43799	0.00255846	0.022806	-1.97888	T
ECD	0.348785	9.42852	5.43246	0.00257024	0.0228832	-1.98417	T
GNS	-0.287985	13.229	-5.4323	0.00257057	0.0228832	-1.98432	T
R3HDM1	-0.38623	11.3525	-5.43187	0.0025715	0.0228832	-1.98474	T
CARD19	0.295926	10.7795	5.43127	0.00257278	0.0228832	-1.98531	T
CDH11	-0.357023	7.95308	-5.42997	0.00257556	0.0228953	-1.98656	T
LOC112532897	-1.69837	1.38168	-5.4286	0.00257849	0.0229084	-1.98787	T
NUP50	-0.342653	11.7965	-5.42795	0.00257987	0.0229084	-1.98849	T
ABCB10	-0.313457	9.96579	-5.42723	0.00258142	0.0229095	-1.98918	T
BF2	-0.277266	14.8881	-5.42279	0.00259097	0.0229817	-1.99344	T
LOC107055472	-0.72123	6.62105	-5.41636	0.00260486	0.0230828	-1.99961	T
TPH2	1.36053	4.62204	5.41619	0.00260522	0.0230828	-1.99977	T
STRADB	0.345222	9.26366	5.4093	0.0026202	0.0231988	-2.00638	T
PRPH	0.437109	7.69664	5.40886	0.00262118	0.0231988	-2.00681	T
LOC121109804	2.56603	2.40684	5.40754	0.00262406	0.0232005	-2.00808	T
NANP	0.307048	9.36924	5.40745	0.00262425	0.0232005	-2.00816	T
ZXDC	-0.284049	8.81708	-5.40589	0.00262767	0.023218	-2.00966	T
ACOT9	-0.279435	9.67324	-5.40072	0.00263901	0.0233055	-2.01463	T
LOC121106754	1.99735	4.45492	5.39554	0.00265045	0.0233938	-2.01962	T
MAPKAPK3	-0.679138	6.77326	-5.3909	0.00266073	0.0234603	-2.02409	T
KIAA1143	-0.298116	9.21435	-5.39082	0.0026609	0.0234603	-2.02416	T
LOC112530078	0.879785	2.88941	5.38997	0.0026628	0.0234642	-2.02498	T
TOR4A	0.390945	8.93317	5.38833	0.00266645	0.0234837	-2.02656	T
MBOAT1	-0.49392	8.42746	-5.38633	0.0026709	0.02351	-2.02848	T
GARS	-0.329366	10.5536	-5.38044	0.00268409	0.0236133	-2.03416	T
RFC3	-0.426861	9.28788	-5.37961	0.00268595	0.0236156	-2.03497	T
IQSEC1	0.508943	10.7655	5.37889	0.00268758	0.0236156	-2.03566	T
ZNF395	-0.556023	7.92382	-5.37816	0.0026892	0.0236156	-2.03636	T
ATG14	-0.40178	7.99754	-5.37772	0.0026902	0.0236156	-2.03679	T
GAB3	0.28542	11.9228	5.37601	0.00269406	0.0236285	-2.03844	T
LOC124417961	-2.51101	1.76966	-5.37577	0.00269459	0.0236285	-2.03867	T
TRHDE	0.54994	6.70503	5.37439	0.0026977	0.0236331	-2.04	T
USP6NL	-0.376172	7.43329	-5.3732	0.0027004	0.0236331	-2.04115	T
LOC112533400	1.27056	1.05195	5.37314	0.00270053	0.0236331	-2.04121	T
EVL	-0.323972	10.8121	-5.37295	0.00270097	0.0236331	-2.04139	T
TBC1D15	0.422789	11.0623	5.37226	0.00270253	0.023634	-2.04206	T
LOC124417607	-0.660593	6.24598	-5.36983	0.00270802	0.0236692	-2.0444	T
BCAR1	0.552368	8.2841	5.36902	0.00270987	0.0236725	-2.04519	T
LOC100857210	-0.589852	3.16337	-5.36456	0.00272001	0.0237275	-2.04949	T
ARL5A	-0.308729	10.5781	-5.36387	0.00272158	0.0237275	-2.05016	T
PHEX	-0.686047	7.12262	-5.36385	0.00272163	0.0237275	-2.05018	T
LOC420486	3.37222	5.9482	5.36368	0.00272203	0.0237275	-2.05035	T
LOC112532884	0.651965	5.2191	5.36239	0.00272496	0.0237288	-2.05159	T
NEU4	2.88999	2.03518	5.36201	0.00272582	0.0237288	-2.05196	T
NCAPH2	-0.410759	10.0455	-5.3616	0.00272677	0.0237288	-2.05236	T
SPINK2	-0.427409	13.7886	-5.36068	0.00272888	0.0237288	-2.05325	T
GPAT3	0.294019	10.0785	5.3604	0.00272952	0.0237288	-2.05352	T
MIR458	1.90933	0.954667	5.3586	0.00273363	0.0237435	-2.05526	T
FGL2	-2.23823	2.55843	-5.35837	0.00273416	0.0237435	-2.05548	T
ZEB2	-0.336387	11.3342	-5.35763	0.00273585	0.0237455	-2.05619	T
CCDC177	0.673175	6.50537	5.35385	0.00274456	0.0238083	-2.05986	T
WTAP	-0.304853	11.0746	-5.35217	0.00274844	0.0238291	-2.06148	T
EXPH5	-1.09084	6.12775	-5.34701	0.00276037	0.0239198	-2.06648	T
WRAP73	0.356632	8.92894	5.34476	0.00276558	0.0239332	-2.06866	T
PASD1	-0.505171	7.42517	-5.34457	0.00276604	0.0239332	-2.06884	T
KIF23	-0.377518	10.7919	-5.34443	0.00276636	0.0239332	-2.06898	T
ARHGAP33	-0.541374	8.69332	-5.34127	0.0027737	0.0239839	-2.07204	T
STXBP1	0.295242	9.70028	5.33438	0.00278984	0.0241105	-2.07872	T
FAM21C	-0.341244	10.99	-5.33085	0.00279813	0.0241692	-2.08215	T
GBP1	-0.320017	10.5343	-5.32881	0.00280294	0.024184	-2.08413	T
ARHGAP45	-0.397327	11.6117	-5.32875	0.0028031	0.024184	-2.08419	T
C2CD4C	3.49599	2.45515	5.32822	0.00280434	0.024184	-2.0847	T
DOK4	0.409194	8.15533	5.32545	0.00281089	0.0242277	-2.08739	T
PAK1	0.314236	9.06048	5.32345	0.00281564	0.0242431	-2.08933	T
RCL1	0.395708	9.28445	5.32343	0.00281569	0.0242431	-2.08936	T
SOAT1	0.309263	12.3295	5.32072	0.00282211	0.0242855	-2.09198	T
NEK2	-0.482869	8.55241	-5.31806	0.00282847	0.0243254	-2.09458	T
HACD2	-0.356886	9.87596	-5.31752	0.00282976	0.0243254	-2.0951	T
SYT14	-0.648576	7.58994	-5.31289	0.00284083	0.0244075	-2.0996	T
C5orf24	-0.291557	11.316	-5.31085	0.00284572	0.0244326	-2.10159	T
LOC121107558	-1.52764	4.5578	-5.31029	0.00284707	0.0244326	-2.10213	T
RBFA	-0.368646	7.18293	-5.30959	0.00284875	0.0244326	-2.10281	T
LOC121106447	0.367132	11.3318	5.30916	0.00284978	0.0244326	-2.10323	T
LRP5	0.298007	10.1131	5.308	0.00285257	0.0244435	-2.10436	T
LOC112530674	-0.444889	10.4954	-5.30669	0.00285575	0.0244457	-2.10564	T
PARG	-0.278124	10.7733	-5.30649	0.00285623	0.0244457	-2.10584	T
NUSAP1	-0.452486	10.0448	-5.30509	0.00285961	0.0244457	-2.1072	T
ABCE1	-0.323647	10.5832	-5.30412	0.00286196	0.0244457	-2.10815	T
MAML2	-0.543302	8.4749	-5.30396	0.00286233	0.0244457	-2.10829	T
FAM3C	0.30593	11.4371	5.30373	0.0028629	0.0244457	-2.10853	T
PTGES3	-0.287261	11.029	-5.30351	0.00286342	0.0244457	-2.10873	T
LOC428335	0.360241	10.8723	5.30277	0.00286521	0.0244481	-2.10946	T
PDGFB	-2.82745	1.67998	-5.30029	0.00287122	0.0244636	-2.11187	T
LOC121109239	0.773659	6.3983	5.30004	0.00287184	0.0244636	-2.11212	T
GSN	-0.333485	10.3876	-5.29997	0.002872	0.0244636	-2.11219	T
LOC107049793	1.06442	5.33642	5.29953	0.00287309	0.0244636	-2.11262	T
LOC100857850	0.639298	6.83217	5.29875	0.00287498	0.0244668	-2.11338	T
ACTR1A	0.419621	10.425	5.29701	0.0028792	0.024483	-2.11507	T
LOC107051698	-1.95498	2.42411	-5.29616	0.00288127	0.024483	-2.1159	T
LOC121106612	0.270783	10.2173	5.2961	0.00288142	0.024483	-2.11596	T
GINS1	-0.413269	8.37668	-5.29448	0.00288538	0.0244886	-2.11754	T
GALK1	0.459501	8.0641	5.29409	0.00288633	0.0244886	-2.11792	T
TRRAP	-0.401279	12.1358	-5.29397	0.00288663	0.0244886	-2.11804	T
WDHD1	-0.544086	8.20595	-5.29047	0.00289518	0.0245483	-2.12145	T
CCNL1	0.306346	9.97364	5.28985	0.00289671	0.0245484	-2.12206	T
GRK6	0.333151	10.4854	5.28846	0.00290012	0.0245544	-2.12341	T
PNPLA3	-0.282489	9.68407	-5.28738	0.00290277	0.0245544	-2.12447	T
CAPN7	0.366781	9.34459	5.2873	0.00290297	0.0245544	-2.12455	T
ELOVL6	-0.304114	9.53997	-5.28605	0.00290605	0.0245544	-2.12577	T
LOC112531787	-1.43359	2.55608	-5.28588	0.00290646	0.0245544	-2.12593	T
IL10	0.775703	6.49249	5.28528	0.00290793	0.0245544	-2.12652	T
SLC16A3	0.42432	11.5685	5.28523	0.00290806	0.0245544	-2.12657	T
MYBL1	-0.467069	8.96787	-5.28202	0.00291598	0.0246008	-2.1297	T
PLK4	-0.374576	9.51083	-5.28177	0.0029166	0.0246008	-2.12994	T
HN1	0.385009	12.0112	5.28046	0.00291986	0.0246154	-2.13123	T
LOC107053352	-0.880691	5.789	-5.27784	0.00292635	0.0246543	-2.13379	T
ADNP2	-0.291334	9.76918	-5.27685	0.00292881	0.0246543	-2.13476	T
SPTY2D1	0.385324	9.7017	5.27467	0.00293423	0.0246851	-2.13689	T
DDX5	-0.317349	14.0281	-5.27362	0.00293684	0.0246942	-2.13792	T
CYBRD1	-0.416447	8.68414	-5.27137	0.00294244	0.0247285	-2.14011	T
TLCD1	-0.341453	10.1007	-5.27009	0.00294565	0.0247426	-2.14137	T
PRICKLE2	-0.496608	5.74368	-5.26821	0.00295037	0.0247516	-2.14321	T
KAT14	-0.282419	9.79549	-5.26815	0.0029505	0.0247516	-2.14327	T
PBK	-0.506034	9.95906	-5.26782	0.00295133	0.0247516	-2.14359	T
ULK2	-0.413601	9.90276	-5.26636	0.00295499	0.0247695	-2.14502	T
LGALS1A	-0.514368	9.47793	-5.26196	0.00296607	0.0248254	-2.14933	T
PRLHR	-0.552927	5.81208	-5.26185	0.00296635	0.0248254	-2.14944	T
TMEM127	0.446747	8.92245	5.2613	0.00296773	0.0248254	-2.14998	T
SDR42E2	-2.40383	2.20718	-5.26082	0.00296895	0.0248254	-2.15045	T
SLC44A5	-1.06529	5.67018	-5.26066	0.00296934	0.0248254	-2.1506	T
LIMS1	-0.372658	9.5614	-5.25927	0.00297287	0.0248264	-2.15197	T
DTNA	0.406491	8.21219	5.25892	0.00297375	0.0248264	-2.15231	T
FGB	-2.42867	2.2196	-5.25879	0.00297407	0.0248264	-2.15244	T
SMAD6	0.452684	7.33303	5.2561	0.00298089	0.0248705	-2.15507	T
C1orf74	0.516196	7.36988	5.25543	0.0029826	0.0248719	-2.15574	T
GPR132	-0.361639	9.5838	-5.25399	0.00298624	0.0248894	-2.15714	T
CENPO	-0.342064	8.34393	-5.24691	0.0030043	0.0250157	-2.16409	T
IL17RD	-0.555616	5.45201	-5.24684	0.00300448	0.0250157	-2.16416	T
MIER3	-0.46643	8.18427	-5.2444	0.00301075	0.0250457	-2.16656	T
SMARCA5	-0.390763	11.7005	-5.24422	0.00301119	0.0250457	-2.16673	T
ARHGAP20B	-0.624095	7.73714	-5.24279	0.00301488	0.0250515	-2.16814	T
LOC121113288	1.26206	4.46539	5.2422	0.00301638	0.0250515	-2.16871	T
DIP2C	0.470795	8.21869	5.24214	0.00301653	0.0250515	-2.16877	T
VCAN	-1.2575	6.33727	-5.23851	0.00302588	0.0251162	-2.17234	T
CCNG1	-0.292328	10.9432	-5.23321	0.00303959	0.0252023	-2.17755	T
LOC107049033	1.32495	4.56953	5.23288	0.00304047	0.0252023	-2.17788	T
PCGF5	-0.307799	11.3248	-5.2327	0.00304093	0.0252023	-2.17806	T
BEAN1	-0.443677	8.22672	-5.23161	0.00304376	0.0252128	-2.17912	T
STAG1	-0.321977	9.90491	-5.22631	0.00305757	0.0252865	-2.18434	T
VAMP2	0.384725	8.75286	5.22577	0.00305898	0.0252865	-2.18487	T
FES	-0.407701	10.2208	-5.22524	0.00306037	0.0252865	-2.1854	T
SKOR1	0.376085	9.63007	5.22524	0.00306038	0.0252865	-2.1854	T
SLC18A1	0.807053	4.01994	5.2252	0.00306048	0.0252865	-2.18544	T
TTLL12	-0.287604	11.0904	-5.22427	0.00306289	0.0252876	-2.18635	T
LOC112531510	2.08899	2.3805	5.2234	0.00306519	0.0252876	-2.18721	T
FAM65C	0.366095	10.0027	5.22329	0.00306546	0.0252876	-2.18731	T
LOC107053293	-2.39844	1.19922	-5.22253	0.00306746	0.0252876	-2.18806	T
SYPL1	0.521521	7.49054	5.22216	0.00306843	0.0252876	-2.18843	T
CACNB4	0.27072	9.01247	5.21926	0.00307605	0.0253175	-2.19129	T
M1AP	-0.313775	6.57461	-5.21917	0.00307627	0.0253175	-2.19137	T
TBC1D4	-0.432712	9.60686	-5.21859	0.0030778	0.0253175	-2.19194	T
SLC39A6	0.322546	10.2808	5.21804	0.00307925	0.0253175	-2.19248	T
CAMKMT	-0.472126	8.17632	-5.2178	0.0030799	0.0253175	-2.19273	T
PAM	0.329868	13.4578	5.21624	0.00308402	0.0253385	-2.19426	T
APLP2	0.306995	11.7138	5.21545	0.0030861	0.0253427	-2.19504	T
EEF2K	-0.445574	8.20871	-5.21415	0.00308953	0.025358	-2.19632	T
RHNO1	-0.303944	6.0357	-5.21127	0.00309715	0.0254076	-2.19916	T
MIR1624	-1.03985	0.519925	-5.20933	0.00310229	0.0254369	-2.20107	T
METAP1	0.282784	10.2657	5.20707	0.00310832	0.0254613	-2.20331	T
LOC101747367	-1.38169	4.13773	-5.20667	0.00310939	0.0254613	-2.2037	T
TUBGCP5	0.36436	9.47995	5.2062	0.00311062	0.0254613	-2.20416	T
DGCR14	0.404351	8.50094	5.20559	0.00311226	0.0254613	-2.20477	T
MKX	-2.35895	3.31898	-5.20525	0.00311315	0.0254613	-2.2051	T
VRK1	-0.303333	9.4058	-5.20467	0.00311472	0.0254613	-2.20568	T
FICD	0.448881	7.90894	5.20378	0.00311709	0.0254678	-2.20655	T
WDFY2	-0.533564	8.03837	-5.20182	0.00312231	0.0254976	-2.20848	T
FH	0.342021	10.2858	5.19939	0.00312885	0.0255285	-2.21089	T
CACUL1	-0.619756	9.62554	-5.19891	0.00313013	0.0255285	-2.21136	T
FAM110B	-0.543037	7.51899	-5.19865	0.00313083	0.0255285	-2.21162	T
SLC7A7	-0.638108	3.84694	-5.19547	0.00313937	0.0255851	-2.21476	T
EXOC3L	3.3773	4.4641	5.19467	0.00314153	0.0255898	-2.21555	T
GFRA1	0.52842	9.79925	5.19006	0.00315398	0.0256671	-2.22011	T
PPT2	0.758974	7.20654	5.18998	0.00315419	0.0256671	-2.22019	T
TMCO4	-0.317943	6.6111	-5.18542	0.00316658	0.025742	-2.2247	T
LOC415661	-2.93961	2.40227	-5.18461	0.00316878	0.025747	-2.2255	T
RASA2	-0.476138	10.2903	-5.18167	0.0031768	0.0257991	-2.22841	T
URB2	-0.270334	11.1015	-5.17993	0.00318156	0.0258248	-2.23014	T
KCTD15	-0.592488	6.83167	-5.17685	0.00319001	0.0258804	-2.23319	T
HMMR	-0.897073	8.48284	-5.1744	0.00319675	0.025922	-2.23562	T
CEP295	-0.655234	8.75306	-5.17203	0.00320327	0.0259619	-2.23797	T
DCLK3	-0.424338	8.87301	-5.17057	0.0032073	0.0259642	-2.23942	T
LOC416755	0.325397	9.83305	5.17023	0.00320823	0.0259642	-2.23975	T
TSPAN17	-0.292382	10.732	-5.17018	0.00320837	0.0259642	-2.2398	T
DRCC1	0.371704	9.06091	5.16898	0.00321168	0.0259779	-2.24099	T
LDB1	-0.329774	11.2794	-5.16807	0.00321419	0.0259853	-2.24189	T
C1QBP	0.470702	11.8501	5.16638	0.00321888	0.0260102	-2.24357	T
[truncated: 14,163 more rows]

## Sheet: SeMC+LPS CTR
Limma resutls for SeMC+LPS/CTR
Transcript	logFC	AveExpr	t	P.Value	adj.P.Val	B	Diff
IL13RA2	5.07352	7.65911	56.7463	1.98152e-08	0.000203554	9.24583	T
IL8L2	3.83897	9.64513	54.1692	2.51908e-08	0.000203554	9.13703	T
CILP	-2.16241	1.08121	-48.0727	4.66623e-08	0.000226255	8.82837	T
K123	3.44782	7.61213	46.0554	5.82185e-08	0.000226255	8.70708	T
CD274	2.90726	8.89478	42.4369	8.88052e-08	0.000226255	8.46002	T
LOC121108265	5.37528	2.68764	41.8039	9.59641e-08	0.000226255	8.41243	T
NOS2	2.75945	9.26091	40.7517	1.09451e-07	0.000226255	8.33012	T
A4GALT	2.89111	7.26146	40.5701	1.12001e-07	0.000226255	8.3155	T
IL8L1	3.71109	8.69467	37.8513	1.60168e-07	0.000265227	8.08066	T
AVD	5.62888	9.01101	37.2811	1.73206e-07	0.000265227	8.02734	T
SNX10	1.94429	10.2487	36.9829	1.80527e-07	0.000265227	7.99886	T
IL1B	4.37565	10.5304	32.396	3.5717e-07	0.000442381	7.50214	T
LECT2	2.35768	14.4264	31.695	3.99755e-07	0.000442381	7.41531	T
MRGPRH	2.2863	11.3187	31.3695	4.21577e-07	0.000442381	7.37388	T
CD72L1	1.61389	9.55999	31.0215	4.46499e-07	0.000442381	7.32878	T
NFKB2	1.77141	11.7311	30.3588	4.98998e-07	0.000442381	7.24053	T
CAPN14	1.80435	9.02777	30.3383	5.00737e-07	0.000442381	7.23775	T
LOC395551	2.86655	9.05992	30.0994	5.21528e-07	0.000442381	7.20512	T
CSMD1	1.6365	9.2012	29.8391	5.45367e-07	0.000442381	7.16908	T
LYZ	2.16595	12.8613	29.4989	5.7852e-07	0.000442381	7.12119	T
SEMA6C	1.3685	7.59326	29.469	5.81547e-07	0.000442381	7.11694	T
LOC107055195	2.10649	6.4026	29.2696	6.02214e-07	0.000442381	7.08842	T
MMP23A	2.42138	8.37568	27.7642	7.90147e-07	0.000502663	6.86253	T
PTGS2	2.89054	6.61585	27.7137	7.97582e-07	0.000502663	6.85462	T
LOC101747613	2.98834	3.05503	27.6458	8.07707e-07	0.000502663	6.84394	T
PI3	4.9693	6.25914	27.4778	8.33418e-07	0.000502663	6.81736	T
S100A12	3.33826	4.56529	27.3291	8.57001e-07	0.000502663	6.79361	T
WDFY4	1.72234	9.25841	27.075	8.9916e-07	0.000502663	6.75257	T
BIRC2	1.31458	10.2303	27.0584	9.02e-07	0.000502663	6.74987	T
SLC7A3	1.4457	11.5665	26.362	1.03136e-06	0.000509185	6.63417	T
NFKBIZ	1.26307	9.51859	26.306	1.04268e-06	0.000509185	6.62467	T
IL4I1	3.61832	4.74059	26.2132	1.0618e-06	0.000509185	6.60884	T
LOC121107122	2.62403	3.68032	26.1747	1.06985e-06	0.000509185	6.60225	T
UNC13D	1.51482	8.59576	26.1016	1.08533e-06	0.000509185	6.5897	T
BTG2	1.65125	8.789	26.0037	1.1065e-06	0.000509185	6.5728	T
LOC107054937	-2.36831	1.18415	-25.8741	1.13525e-06	0.000509185	6.55031	T
ACTA2	1.42849	12.79	25.7409	1.16576e-06	0.000509185	6.52699	T
TGM4	4.18345	6.29713	25.469	1.23112e-06	0.000523583	6.47883	T
HEPHL1	1.85694	8.20331	25.0386	1.34374e-06	0.000525696	6.40101	T
ENKUR	1.21583	6.53207	25.0218	1.34839e-06	0.000525696	6.39793	T
IL1R2	2.2434	7.7593	24.9955	1.3557e-06	0.000525696	6.39309	T
NINJ1	1.59374	9.66833	24.9579	1.3662e-06	0.000525696	6.3862	T
FBXL21	1.46374	10.5064	24.8055	1.40987e-06	0.000529881	6.35802	T
LOC101750112	2.49093	8.09179	24.409	1.53146e-06	0.000562498	6.28353	T
LOC419276	2.09623	9.8791	24.1857	1.60544e-06	0.000574295	6.2408	T
CMBL	4.30614	6.82251	24.1009	1.63465e-06	0.000574295	6.22441	T
BATF3	2.14557	8.1458	23.9482	1.68884e-06	0.000580709	6.19471	T
KLF5	1.01637	10.0887	23.2881	1.94929e-06	0.000654636	6.06306	T
PIGR	5.80434	3.76591	23.2062	1.98485e-06	0.000654636	6.04635	T
C1QA	-1.03022	10.8456	-23.0436	2.05772e-06	0.000665098	6.01294	T
RNF19B	1.28864	7.9135	22.5172	2.3166e-06	0.000734088	5.90243	T
LOC121109965	1.93593	5.57474	22.2635	2.45514e-06	0.000762458	5.84786	T
SLCO4C1	1.27379	11.9775	22.1842	2.50048e-06	0.000762458	5.83062	T
WIPF3	-1.14603	5.47751	-21.7065	2.79559e-06	0.000836658	5.72495	T
C1QB	-1.03406	10.7104	-21.1645	3.18214e-06	0.000910727	5.60114	T
CCL5	5.58688	5.42868	21.1533	3.19081e-06	0.000910727	5.59852	T
PDE4B	0.902472	9.71178	21.1258	3.21214e-06	0.000910727	5.59212	T
[truncated: 16,104 more rows]

## Sheet: SeMC CTR
Limma resutls for SeMC/CTR
[truncated: 16,162 more rows]
